# Supplementary material for: Myofibroblast senescence promotes arrhythmogenic remodeling in the aged infarcted rabbit heart
Source: eLife. 2023 May 19;12:e84088. doi: 10.7554/eLife.84088 (PMC10259375; doi:10.7554/eLife.84088)
Supplement: Figure 1—source data 1. [file elife-84088-fig1-data1.xlsx]

## Sheet: Raw Records
		Rabbit mastersheet
Rabbit ID	DOB	DOD	Sex	Age Group	Phenotype	Study Type	Study Date	Age at Surgery (Days)	Age at Surgery (Years)	Days post-MI	Weeks post-MI	Comment	VT/VF during surgery?	Cardioverted?	Reached Endpoint? (1=Yes)	Procedural Death: VT/VF	Procedural Death: non-VT/VF	Survival: VT/VF	Survival: no VT/VF	Survival: no ECG data	Acute SCD	Chronic SCD	Include In Mortality Analysis?	Amio treatment	PVC	Vfib	Defib?	Amio Treatment (vfib doc)	Notes (vfib doc)	Notes
S-1170	2014-08-22	2019-10-23	F	Aged	RBSN	MI	2019-10-22	1887	5.16986	1	0.142857	Found dead next day of MI	Can't tell		0	0	0	0	0	1	1	0	Yes	Pump						Died next day
R597	2010-06-06	2015-10-08	F	Aged	RBSN	MI	2015-10-06	1948	5.33699	2	0.285714	Died in cage after failed MI, multiple causes	Can't tell		0	0	0	0	0	1	1	0	Yes
B-1381	2015-10-25	2019-11-18	F	Aged	RBSN	MI	2019-10-29	1465	4.0137	20	2.85714	BHH (3 weeks post-MI, Brett)	Can't tell		1	0	0	0	0	1	0	0	Yes	Pump						0
F366	2012-09-01	2017-07-05	F	Aged	RBSN	MI	2017-06-14	1747	4.7863	21	3	Dmitry used for cell, Sac'd for cells	Can't tell		1	0	0	0	0	1	0	0	Yes							0
F-924	2014-08-24	2019-12-09	F	Aged	RBSN	MI	2019-11-18	1912	5.23836	21	3	BHH for Histochemistry (Brett)	Can't tell		1	0	0	0	0	1	0	0	Yes
R245	2009-03-01	2014-08-26	F	Aged	RBSN	MI	2014-08-05	1983	5.43288	21	3	Histology	Can't tell		1	0	0	0	0	1	0	0	Yes
F991	2014-08-31	2019-07-09	F	Aged	RBSN	MI	2019-04-17	1690	4.63014	83	11.8571	Sacarificed for optical mapping	Can't tell		1	0	0	0	0	1	0	0	Yes
1151	2014-12-26	2019-04-09	F	Aged	RBSN	MI	2019-04-09	1565	4.28767	0	0	Euthanized after surgery, probable neurologic problem	No		0	0	1	0	0	0	0	0	Yes	Pump	Yes	No		Pump (Died)	Euthanize	Euthanized after surgery since probably neurologic damage on the brain.
F277	2013-02-01	2017-08-22	F	Aged	RBSN	MI	2017-08-22	1663	4.55616	0	0	Died same day.	No		0	0	1	0	0	0	0	0	Yes	Oral	No	No		Oral Ami (Died)		0
F758	2012-03-12	2016-06-07	F	Aged	RBSN	MI	2016-06-07	1548	4.2411	0	0	Died 3 hours post MI presumably VT/VF	No		0	0	1	0	0	0	0	0	Yes
R172	2009-03-01	2014-07-16	F	Aged	RBSN	MI	2014-07-16	1963	5.37808	0	0	intestinal parasites, died during procedure	No		0	0	1	0	0	0	0	0	Yes
R192	2009-12-01	2015-03-19	F	Aged	RBSN	old MI	2015-03-19	1934	5.29863	0	0	found dead POD 1	No		0	0	1	0	0	0	0	0	Yes
R3725	2009-12-01	2015-03-24	F	Aged	RBSN	old MI	2015-03-24	1939	5.31233	0	0	found dead 4.5 hours post coil	No		0	0	1	0	0	0	0	0	Yes
R861	2010-06-01	2015-10-13	F	Aged	RBSN	MI	2015-10-13	1960	5.36986	0	0	Died during procedure	No		0	0	1	0	0	0	0	0	Yes
S2924	2014-07-01	2018-09-18	F	Aged	RBSN	MI	2018-09-18	1540	4.21918	0	0	ECHO (9/07/2018), died 1 hour later	No		0	0	1	0	0	0	0	0	Yes	Pump	No	No		Pump (Died)	Dead before the pump started	0
1121	2014-11-05	2019-10-30	F	Aged	RBSN	MI	2019-10-30	1820	4.9863	0	0	The rabbit died during the surgery	Yes	No	0	1	0	0	0	0	0	0	Yes							Died before coil placement
F1127	2012-04-12	2016-06-28	F	Aged	RBSN	MI	2016-06-28	1538	4.2137	0	0	Died in cage 48-72 hrs post MI	Yes	No	0	1	0	0	0	0	0	0	Yes
B297	2014-06-01	2018-08-15	F	Aged	RBSN	MI	2018-08-15	1536	4.20822	0	0	She died during the surgery.	Yes	No	0	1	0	0	0	0	0	0	Yes							0
B428	2012-03-19	2016-06-13	F	Aged	RBSN	MI	2016-06-13	1547	4.23836	0	0	Died from VT after contrast injection	Yes	No	0	1	0	0	0	0	0	0	Yes
F62	2011-08-02	2016-03-14	F	Aged	RBSN	MI	2016-03-14	1686	4.61918	0	0	VT/VF on Table	Yes	No	0	1	0	0	0	0	0	0	Yes
F829	2012-05-10	2018-01-03	F	Aged	RBSN	MI	2018-01-03	2064	5.65479	0	0	Died during the surgery because of VF after coil placement.	Yes	No	0	1	0	0	0	0	0	0	Yes							0
F18	2011-11-06	2016-11-28	F	Aged	RBSN	MRI 11/15	2016-11-28	1849	5.06575	0	0	Dead during the procedure	Yes	No	0	1	0	0	0	0	0	0	Yes
F334	2012-04-09	2018-02-07	0	Aged	RBSN	MI	2018-02-07	2130	5.83562	0	0	Died druring the surgery after coil deployed	Yes	No	0	1	0	0	0	0	0	0	Yes							0
F897	2011-05-11	2015-08-18	F	Aged	RBSN	MI	2015-08-18	1560	4.27397	0	0	Died during surgery	Yes	No	0	1	0	0	0	0	0	0	Yes
F624	2013-10-01	2018-09-11	F	Aged	RBSN	MI	2018-09-11	1806	4.94795	0	0	Died during the surgery	Yes	No	0	1	0	0	0	0	0	0	Yes							0
F648	2012-10-26	2018-07-02	F	Aged	RBSN	MI	2018-07-02	2075	5.68493	0	0	Died during the surgery of MI	Yes	No	0	1	0	0	0	0	0	0	Yes							0
F732	2012-09-01	2017-05-17	F	Aged	RBSN	MI	2017-05-17	1719	4.70959	0	0	Died during the surgery	Yes	No	0	1	0	0	0	0	0	0	Yes							0
F734	2011-08-01	2017-09-05	F	Aged	RBSN	MI	2017-09-05	2227	6.10137	0	0	Died during the surgery	Yes	No	0	1	0	0	0	0	0	0	Yes							0
F74	2011-03-11	2016-03-21	F	Aged	RBSN	MI	2016-03-21	1837	5.03288	0	0	VT/VF on Table	Yes	No	0	1	0	0	0	0	0	0	Yes
F801	2012-03-10	2016-06-20	F	Aged	RBSN	MI	2016-06-20	1563	4.28219	0	0	VT/VF on Table	Yes	No	0	1	0	0	0	0	0	0	Yes
MH112	2008-12-01	2013-06-26	F	Aged	RBSN	MI	2013-06-26	1668	4.56986	0	0	died ventricular arrhythmia p coil	Yes	No	0	1	0	0	0	0	0	0	Yes
R067	2009-12-01	2015-06-09	F	Aged	RBSN	MI	2015-06-09	2016	5.52329	0	0	VT/VF 19 min p coil	Yes	No	0	1	0	0	0	0	0	0	Yes
F884	2012-05-10	2018-02-12	F	Aged	RBSN	MI	2018-02-12	2104	5.76438	0	0	Died during the surgery because of VF after coil placement.	Yes	No	0	1	0	0	0	0	0	0	Yes							0
R097	2009-12-01	2014-03-04	F	Aged	RBSN	MI	2014-03-04	1554	4.25753	0	0	died ventricular arrhythmia p coil	Yes	No	0	1	0	0	0	0	0	0	Yes
H596	2012-01-05	2016-10-20	F	Aged	RBSN	MI	2016-10-20	1750	4.79452	0	0	Dead during the procedure	Yes	No	0	1	0	0	0	0	0	0	Yes
R405	2009-07-20	2014-12-08	F	Aged	RBSN	MI	2014-12-08	1967	5.38904	0	0	0	Yes	No	0	1	0	0	0	0	0	0	Yes
R466	2009-12-01	2015-05-26	F	Aged	RBSN	MI	2015-05-26	2002	5.48493	0	0	VT/VF 15 min p coil	Yes	No	0	1	0	0	0	0	0	0	Yes
R566	2009-05-01	2013-11-05	F	Aged	RBSN	MI	2013-11-05	1649	4.51781	0	0	died at MI, VT/VF after coil placement	Yes	No	0	1	0	0	0	0	0	0	Yes
S723	2008-12-01	2013-06-18	F	Aged	RBSN	MI	2013-06-18	1660	4.54795	0	0	0	Yes	No	0	1	0	0	0	0	0	0	Yes
X218	2010-09-05	2014-12-22	F	Aged	RBSN	MI	2014-12-22	1569	4.29863	0	0	Previously Tagged CH185	Yes	No	0	1	0	0	0	0	0	0	Yes
X224	2009-12-01	2015-02-26	F	Aged	RBSN	old MI	2015-02-26	1913	5.2411	0	0	formerly tagged 297 (duplicate number), VT @ MI	Yes	No	0	1	0	0	0	0	0	0	Yes							Died before coil placement
S341	2012-05-19	2018-02-13	0	Aged	RBSN	MI	2018-02-13	2096	5.74247	0	0	Died during the surgery	Yes	No	0	1	0	0	0	0	0	0	Yes							0
XX0203	2009-03-05	2013-10-03	F	Aged	RBSN	MI	2013-10-03	1673	4.58356	0	0	did not survive MI procedure	Yes	No	0	1	0	0	0	0	0	0	Yes
CH56	2012-08-01	2017-06-01	F	Aged	RBSN	MI	2017-05-31	1764	4.83288	1	0.142857	Found dead next dayof MI	No		0	0	0	0	1	0	1	0	Yes							0
F1000	2014-01-01	2018-09-05	F	Aged	RBSN	MI	2018-09-04	1707	4.67671	1	0.142857	Found dead next day of MI	No		0	0	0	0	1	0	1	0	Yes	None	Yes	No		No treatment (Died)		0
F24	2014-12-26	2019-03-06	F	Aged	RBSN	MI	2019-03-05	1530	4.19178	1	0.142857	Found dead next day	No		0	0	0	0	1	0	1	0	Yes	Pump	No	No		Pump (Died)		0
F307	2012-03-11	2016-10-05	F	Aged	RBSN	MI	2016-10-04	1668	4.56986	1	0.142857	Found dead next day after MI	No		0	0	0	0	1	0	1	0	Yes
F939	2012-10-01	2017-07-13	F	Aged	RBSN	MI	2017-07-12	1745	4.78082	1	0.142857	Found dead next day of MI	No		0	0	0	0	1	0	1	0	Yes	Oral	Yes	No		Oral Ami(Died)		0
R218	2010-06-06	2016-03-19	F	Aged	RBSN	MI	2016-03-18	2112	5.7863	1	0.142857	Found dead in cage 25 hours Post Op. SCD	No		0	0	0	0	1	0	1	0	Yes
R328	2010-06-05	2015-07-29	F	Aged	RBSN	MI	2015-07-28	1879	5.14795	1	0.142857	Died after MI, used for histology	No		0	0	0	0	1	0	1	0	Yes
S333	2011-05-11	2015-09-23	F	Aged	RBSN	MI	2015-09-22	1595	4.36986	1	0.142857	Found dead POD 1	No		0	0	0	0	1	0	1	0	Yes
CH111	2010-08-16	2014-11-19	F	Aged	RBSN	MI	2014-11-18	1555	4.26027	1	0.142857	OM	No		1	0	0	0	1	0	0	0	Yes
CH173	2010-09-12	2014-11-25	F	Aged	RBSN	MI	2014-11-24	1534	4.20274	1	0.142857	OM	No		1	0	0	0	1	0	0	0	Yes
F862	2012-05-01	2017-09-13	F	Aged	RBSN	MI	2017-09-12	1960	5.36986	1	0.142857	Found dead next day	Yes	Yes	0	0	0	1	0	0	1	0	Yes	Oral	Yes	No		Oral Ami (Died)		0
F706	2012-05-02	2018-04-12	F	Aged	RBSN	MI	2018-04-10	2169	5.94247	2	0.285714	Found dead 2 days after MI surgery.	Yes		0	0	0				0	0	No	Amiodarone SR	No	Yes	No	SR-Ami (Died)		0
F1047	2013-05-20	2018-06-29	F	Aged	RBSN	MI	2018-06-27	1864	5.10685	2	0.285714	Found dead 2 days after MI surgery	No		0	0	0				0	0	No	Amiodarone SR	No	No		SR-Ami (Died)		0
F359	2012-09-02	2018-06-21	F	Aged	RBSN	MI	2018-06-21	2118	5.80274	0	0	Found dead same day of MI	No		0	0	0				0	0	No	Amiodarone SR	Yes	No		SR-Ami (Died)		0
F841	2012-05-12	2018-02-08	0	Aged	RBSN	MI	2018-02-06	2096	5.74247	2	0.285714	Found dead 2 days after surgery	Can't tell		0	0	0				0	0	No	Amiodarone SR						0
F891	2012-05-01	2017-02-15	F	Aged	RBSN	MI	2017-02-08	1744	4.77808	7	1	Rabbit died just before coming down for sac. Vet tech witness. We took the heart immediately for Histology (Kevin)	No		0	0	0				0	0	No	Amiodarone SR	No	No		SR-Ami (Died)		0
H68	2009-01-01	2013-03-20	F	Aged	RBSN	MI	2013-03-20	1539	4.21644	0	0	no coil deployment, but EKG evidence of injury, died 7 hours post MI	Can't tell		0	0	0				0	0	No
R458	2009-12-01	2014-03-13	F	Aged	RBSN	MI	2014-03-12	1562	4.27945	1	0.142857	Died 9 hrs after MI due to VT/VF	Yes	Yes	0	0	0	1	0	0	1	0	Yes
R610	2008-04-12	2013-09-24	F	Aged	RBSN	MI	2013-09-23	1990	5.45205	1	0.142857	MI;Rabbit died after 4hrs due to ventricular arrhythmia	Yes	Yes	0	0	0	1	0	0	1	0	Yes
R612	2008-04-12	2013-11-06	F	Aged	RBSN	MI	2013-10-10	2007	5.49863	27	3.85714	no coil deployed but ischemia V456, no infarct	Can't tell		0	0	0				0	0	No
F824	2012-03-19	2016-12-29	F	Aged	RBSN	MI	2016-12-27	1744	4.77808	2	0.285714	Found dead 4 days later MI	No		0	0	0	0	1	0	1	0	Yes
S2480	2011-08-11	2016-01-15	F	Aged	RBSN	MI	2016-01-13	1616	4.4274	2	0.285714	Found dead in cage POD2, Presumed SCD	No		0	0	0	0	1	0	1	0	Yes
R230	2009-12-01	2014-03-28	F	Aged	RBSN	MI	2014-03-25	1575	4.31507	3	0.428571	SCD during handling, died from SCD 71hrs post-procedure from vet abdominal palpation and handling	Yes	Yes	0	0	0	1	0	0	1	0	Yes
R1954	2011-01-11	2016-03-01	F	Aged	RBSN	MI	2016-02-24	1870	5.12329	6	0.857143	Found dead in cage. Suspected Heart Failure.	No		0	0	0	0	1	0	0	1	Yes
CH233	2012-03-21	2016-06-22	F	Aged	RBSN	MI	2016-06-14	1546	4.23562	8	1.14286	Sac'd for 7 day histology	No		1	0	0	0	1	0	0	0	Yes
CH331	2011-12-25	2016-06-15	F	Aged	RBSN	MI	2016-06-06	1625	4.45205	9	1.28571	0	Yes	Yes	1	0	0	1	0	0	0	0	Yes
F949	2011-09-30	2016-09-26	F	Aged	RBSN	MI	2016-09-13	1810	4.9589	13	1.85714	BHH for Kevin	Yes	Yes	1	0	0	1	0	0	0	0	Yes
H962	2012-09-01	2017-02-07	F	Aged	RBSN	MI	2017-01-24	1606	4.4	14	2	Sac. For Kevin	No		1	0	0	0	1	0	0	0	Yes							0
F322	2011-03-25	2016-09-15	F	Aged	RBSN	MI	2016-09-01	1987	5.44384	14	2	BHH for Kevin	Yes	Yes	1	0	0	1	0	0	0	0	Yes
S1474	2014-09-15	2019-03-28	F	Aged	RBSN	MI	2019-03-13	1640	4.49315	15	2.14286	Found dead 15 days after MI	No		0	0	0	0	1	0	0	1	Yes	Pump	Yes	No		Pump		Dead 15thdays later
F184	2012-04-24	2016-12-07	F	Aged	RBSN	MRI(11/08 and 12/06)	2016-11-21	1672	4.58082	16	2.28571	Sacr. For Kevin	Yes	Yes	1	0	0	1	0	0	0	0	Yes
R095	2009-03-01	2014-07-02	F	Aged	RBSN	MI	2014-06-12	1929	5.28493	20	2.85714	Biochemistry	No		1	0	0	0	1	0	0	0	Yes
F1198	2011-12-02	2016-05-09	F	Aged	RBSN	MI	2016-04-18	1599	4.38082	21	3	Sac'd for Optical Mapping	No		1	0	0	0	1	0	0	0	Yes
F761	2012-01-01	2017-03-29	F	Aged	RBSN	MI	2017-03-08	1893	5.1863	21	3	1stMRI 03/02 MI 3/8 2ndMRI 3/21; Sac'd for cells	No		1	0	0	0	1	0	0	0	Yes							0
F846	2012-05-04	2017-09-20	F	Aged	RBSN	MI	2017-08-30	1944	5.32603	21	3	Sac. For the cells	No		1	0	0	0	1	0	0	0	Yes	Oral	No	No		Oral Ami		0
F851	2012-05-01	2017-03-22	F	Aged	RBSN	MI	2017-03-01	1765	4.83562	21	3	03/016/2017 POSTMI-MRI; Sac'd for cells	No		1	0	0	0	1	0	0	0	Yes							0
R053	2009-12-01	2015-07-07	F	Aged	RBSN	MI	2015-06-16	2023	5.54247	21	3	2 coils same vessel/ sac'd for histology	No		1	0	0	0	1	0	0	0	Yes
R126	2009-03-01	2014-09-25	F	Aged	RBSN	MI	2014-09-04	2013	5.51507	21	3	Histology, atria to Choi	No		1	0	0	0	1	0	0	0	Yes
R163	2009-12-01	2014-04-08	F	Aged	RBSN	MI	2014-03-18	1568	4.29589	21	3	Histology	No		1	0	0	0	1	0	0	0	Yes
R4304	2010-06-07	2015-08-25	F	Aged	RBSN	MI	2015-08-04	1884	5.16164	21	3	histology	No		1	0	0	0	1	0	0	0	Yes
R485	2009-03-01	2014-08-12	F	Aged	RBSN	MI	2014-07-22	1969	5.39452	21	3	For Histology	No		1	0	0	0	1	0	0	0	Yes
X179	2011-01-01	2016-01-28	F	Aged	RBSN	MI	2016-01-07	1832	5.01918	21	3	Sac'd for Histology	No		1	0	0	0	1	0	0	0	Yes
R419	2009-12-01	2014-03-18	F	Aged	RBSN	MI	2014-02-25	1547	4.23836	21	3	For Histology, septal MI	Yes	Yes	1	0	0	1	0	0	0	0	Yes
CH256	2010-09-19	2015-01-30	F	Aged	RBSN	MI	2015-01-08	1572	4.30685	22	3.14286	biochemistry	No		1	0	0	0	1	0	0	0	Yes
CH303	2011-09-11	2016-02-09	F	Aged	RBSN	MI	2016-01-18	1590	4.35616	22	3.14286	0	No		1	0	0	0	1	0	0	0	Yes
CH374	2011-12-12	2016-02-17	F	Aged	RBSN	MI	2016-01-26	1506	4.12603	22	3.14286	Sac'd for biochemistry	No		1	0	0	0	1	0	0	0	Yes
F427	2011-04-28	2016-01-28	F	Aged	RBSN	MI	2016-01-06	1714	4.69589	22	3.14286	Sac'd for Histology	No		1	0	0	0	1	0	0	0	Yes
R498	2010-06-01	2015-08-12	F	Aged	RBSN	MI	2015-07-21	1876	5.13973	22	3.14286	Sac'd for histology	No		1	0	0	0	1	0	0	0	Yes
S2827	2012-03-19	2016-07-21	F	Aged	RBSN	MI	2016-06-29	1563	4.28219	22	3.14286	0	No		1	0	0	0	1	0	0	0	Yes
X180	2011-08-25	2016-02-10	F	Aged	RBSN	MI	2016-01-19	1608	4.40548	22	3.14286	Sac'd for Biochemistry	No		1	0	0	0	1	0	0	0	Yes
X216	2009-09-28	2015-01-09	F	Aged	RBSN	MI	2014-12-18	1907	5.22466	22	3.14286	Previously Tagged CR818	No		1	0	0	0	1	0	0	0	Yes
X227	2011-05-11	2015-08-05	F	Aged	RBSN	MI	2015-07-14	1525	4.17808	22	3.14286	Histology (had ventricular anyreusim)	No		1	0	0	0	1	0	0	0	Yes
F894	2012-05-12	2018-05-09	F	Aged	RBSN	MI	2018-02-14	2104	5.76438	84	12	BHH for histochemistry (Brett)	No		1	0	0				0	0	No	Amiodarone SR	No	No		SR-Ami		0
XX0176	2009-06-01	2014-06-04	F	Aged	RBSN	MI	2014-05-13	1807	4.95068	22	3.14286	Histology	Yes	Yes	1	0	0	1	0	0	0	0	Yes
S700	2010-07-19	2015-01-07	F	Aged	RBSN	MI	2014-12-15	1610	4.41096	23	3.28571	biochemistry	No		1	0	0	0	1	0	0	0	Yes
X181	2011-05-11	2016-02-03	F	Aged	RBSN	MI	2016-01-11	1706	4.67397	23	3.28571	Formerly X178, retagged X181	No		1	0	0	0	1	0	0	0	Yes
AG0175	2008-08-01	2013-01-04	F	Aged	RBSN	MI	2012-12-12	1594	4.36712	23	3.28571	(Robinson) H154, true MI	Yes	Yes	1	0	0	1	0	0	0	0	Yes
S662	2009-01-01	2013-05-03	F	Aged	RBSN	MI	2013-04-09	1559	4.27123	24	3.42857	OM	No		1	0	0	0	1	0	0	0	Yes
S686	2009-01-01	2013-05-02	F	Aged	RBSN	MI	2013-04-08	1558	4.26849	24	3.42857	OM	Yes	Yes	1	0	0	1	0	0	0	0	Yes
S611	2009-01-01	2013-04-12	F	Aged	RBSN	MI	2013-03-18	1537	4.21096	25	3.57143	OM	No		1	0	0	0	1	0	0	0	Yes
R297	2009-05-01	2013-12-03	F	Aged	RBSN	MI	2013-11-07	1651	4.52329	26	3.71429	subendocardial MI? OM	No		1	0	0	0	1	0	0	0	Yes
S1119	2014-01-11	2019-05-06	F	Aged	RBSN	MI	2019-03-12	1886	5.16712	55	7.85714	Sac. For Optical mapping	No		1	0	0	0	1	0	0	0	Yes	Pump	No	No		Pump		0
F985	2014-07-01	2018-12-18	F	Aged	RBSN	MI	2018-09-25	1547	4.23836	84	12	BHH 12/18/18 (Brett)	No		1	0	0	0	1	0	0	0	Yes	Pump	Yes	No		Pump		0
S1165	2014-06-01	2018-11-15	F	Aged	RBSN	MI	2018-08-22	1543	4.2274	85	12.1429	8/08/2018 ECHO practice, 12weeks BHH (11/15/2018)	Yes	Yes	1	0	0	1	0	0	0	0	Yes	None	Yes	Yes	No	No treatment		0
B1149	2012-04-02	2018-09-06	F	Aged	RBSN	MI	2018-06-12	2262	6.19726	86	12.2857	12 weeks BHH (9/6/2018; Brett)	No		1	0	0	0	1	0	0	0	Yes	None	Yes	No		No treatment		0
3700	2012-12-18	2014-09-11	F	Exclude	LMC1	MI	2014-09-10	631	1.72877	1	0.142857	Coil in pelvis. Had infarct anyway. SCD, VF.	Can't tell		0	0	0				0	0	No
0516	2006-04-08	2008-05-04	M	Exclude	LMC	MI/true	2008-04-30	753	2.06301	4	0.571429	VF22 found dead in cage..brady	Can't tell		0	0	0				0	0	No
0538	2006-04-17	2007-11-29	M	Exclude	LMC	MI/true	2007-11-29	591	1.61918	0	0	VF13 died after induced MI	Yes		0	0	0				0	0	No
0546	2006-05-12	2007-10-03	F	Exclude	LMC	MI/true	2007-10-03	509	1.39452	0	0	Ohad VF7	Yes		0	0	0				0	0	No
0573	2006-08-21	2007-10-04	F	Exclude	LMC	MI/true	2007-10-04	409	1.12055	0	0	Ohad VF8	Yes		0	0	0				0	0	No
X156	2016-01-10	2017-10-18	F	Exclude	RBSN	MI	2017-10-17	646	1.76986	1	0.142857	Found dead next day	No		0	0	0				0	0	No	0	Yes	No		Oral Ami (Died)		0
0867	2007-03-23	2008-04-17	M	Exclude	LMC	MI/true	2008-04-17	391	1.07123	0	0	VF 21 died during coil infarct study	Yes		0	0	0				0	0	No
X162	2017-07-02	2018-07-31	F	Exclude	RBSN	MI	2018-07-31	394	1.07945	0	0	Died during the surgery of MI	Can't tell		0	0	0				0	0	No	0						0
X160	2017-07-02	2018-07-04	F	Exclude	RBSN	MI	2018-07-03	366	1.00274	1	0.142857	Found dead next day of MI	Yes		0	0	0				0	0	No	Amiodarone SR	Yes	Yes	Yes	SR-Ami (Died)		0
X163	2017-07-02	2018-08-02	F	Exclude	RBSN	MI	2018-08-02	396	1.08493	0	0	Died POD1	Yes		0	0	0				0	0	No	Amiodarone SR	No	Yes	No	SR-Ami (Died)		0
X117	2016-07-01	2017-08-16	F	Exclude	RBSN	MI	2017-07-25	389	1.06575	22	3.14286	Post-op 3w	Yes		1	0	0				0	0	No	0	No	Yes	Yes	Oral Ami		0
X142	2016-07-01	2017-08-16	F	Exclude	RBSN	MI	2017-07-26	390	1.06849	21	3	BHH	Yes		1	0	0				0	0	No	0	No	Yes	Yes	Oral Ami		0
X154	2016-01-12	2017-10-12	F	Exclude	RBSN	MI	2017-10-03	630	1.72603	9	1.28571	Sac. For cell	Yes		1	0	0				0	0	No	0	Yes	Yes	Yes	Oral Ami		0
X155	2016-01-12	2017-10-17	F	Exclude	RBSN	MI	2017-10-10	637	1.74521	7	1	BHH on POD7	Yes		1	0	0				0	0	No	0	Yes	Yes	Yes	Oral Ami		0
2793	2010-02-22	2011-08-18	M	Exclude	LMC	MI/true	2011-07-28	521	1.4274	21	3	TICM/DMT/GX	Can't tell		1	0	0				0	0	No
3736	2013-04-19	2014-06-11	F	Exclude	LMC1	MI	2014-05-20	396	1.08493	22	3.14286	histology	No		1	0	0				0	0	No
4591	2016-01-05	2017-05-02	F	Exclude	LMC2	Kevin	2017-04-18	469	1.28493	14	2	Transfer to 5013-17 MI Sac. For Kevin	Can't tell		1	0	0				0	0	No	0						0
4594	2016-01-04	2017-05-02	F	Exclude	LMC2	MI	2017-04-25	477	1.30685	7	1	Transfer to 5013-17 1 week POSTMI Sac. For Kevin	Can't tell		1	0	0				0	0	No	0						0
X152	2016-01-12	2017-10-04	F	Exclude	RBSN	MI	2017-09-13	610	1.67123	21	3	Sac'd for cells	No		1	0	0				0	0	No	0	No	No		Oral Ami		0
X153	2016-01-12	2017-11-08	F	Exclude	RBSN	No-MI	2017-09-27	624	1.70959	42	6	Coil replacment could have been done, because of very small OM1. Sac'd for frozen heart	Can't tell		1	0	0				0	0	No
X164	2017-07-02	2018-11-06	F	Exclude	RBSN	MI	2018-08-14	408	1.11781	84	12	8/08/2018 ECHO practice, 12weeks BHH (11/6)	Can't tell		1	0	0				0	0	No	0						0
X233	2015-03-05	2015-12-13	F	Young	RBSN	MI	2015-12-07	277	0.758904	6	0.857143	Rabbit had no coil placed. But apparent MI in CX. Unkown cause	No		0	0	0	0	1	0	0	1	Yes
X112	2016-09-01	2017-05-10	F	Young	RBSN	MI	2017-05-03	244	0.668493	7	1	Die one week later	No		0	0	0	0	1	0	0	1	Yes	0						0
X116	2016-07-01	2017-06-22	F	Young	RBSN	MI	2017-06-21	355	0.972603	1	0.142857	Found dead next day of MI	No		0	0	0	0	1	0	1	0	Yes	0						0
X151	2017-01-01	2017-08-30	F	Young	RBSN	MI	2017-08-29	240	0.657534	1	0.142857	Found dead next day	No		0	0	0	0	1	0	1	0	Yes	Oral	No	No		Oral Ami (Died)		0
X185	2016-06-16	2017-03-30	F	Young	RBSN	MI	2017-03-29	286	0.783562	1	0.142857	Two coil deployed, next day found dead.	No		0	0	0	0	1	0	1	0	Yes	0						0
X201	2018-01-22	2018-08-24	F	Young	RBSN	MI	2018-08-23	213	0.583562	1	0.142857	8/08/2018 ECHO practice, Found dead POD1.	No		0	0	0	0	1	0	1	0	Yes	None	No	No		No treatment (Died)		0
X236	2015-05-06	2016-02-12	F	Young	RBSN	MI	2016-02-11	281	0.769863	1	0.142857	Coil in CX. Rabbit died of SCD <24 hrs postop	No		0	0	0	0	1	0	1	0	Yes
X242	2016-06-16	2017-01-26	F	Young	RBSN	MI	2017-01-25	223	0.610959	1	0.142857	Found dead next day of MI	No		0	0	0	0	1	0	1	0	Yes	0						0
X177	2016-06-16	2017-04-06	F	Young	RBSN	MI	2017-04-04	292	0.8	2	0.285714	Found Dead 2days after MI	No		0	0	0	0	1	0	1	0	Yes	0						0
X182	2016-06-16	2017-03-24	F	Young	RBSN	MI	2017-03-22	279	0.764384	2	0.285714	Eutha. Because of paralysis	No		0	0	0	0	1	0	1	0	Yes
X109	2015-10-17	2016-05-31	F	Young	RBSN	MI	2016-05-31	227	0.621918	0	0	Coil too high. Falling ET C02 Bradycardic death.	No		0	0	1	0	0	0	0	0	Yes
X113	2016-09-01	2017-05-09	F	Young	RBSN	MI	2017-05-09	250	0.684932	0	0	Died 2 hours after MI	No		0	0	1	0	0	0	0	0	Yes	0						0
X212	2014-05-05	2014-12-11	F	Young	RBSN	young MI	2014-12-11	220	0.60274	0	0	died, Big MI, hypotension, then 2:1, then EMD	No		0	0	1	0	0	0	0	0	Yes	0						0
X214	2014-05-05	2014-12-02	F	Young	RBSN	young MI	2014-12-02	211	0.578082	0	0	died, hypotension p coil, poor perf, ,then brady	No		0	0	1	0	0	0	0	0	Yes
X229	2015-03-05	2015-10-20	F	Young	RBSN	MI	2015-10-20	229	0.627397	0	0	0	No		0	0	1	0	0	0	0	0	Yes	Pump						Died 1 hour after MI
X211	2014-05-05	2015-02-10	F	Young	RBSN	young MI	2015-02-10	281	0.769863	0	0	falling CO2, VT/VF	No		0	0	1	0	0	0	0	0	Yes	Pump	Yes	No		Pump (Died)		Rabbit died before the pump started work.
D216	2016-02-14	2016-12-11	F	Young	RBSN	MRI 10/06	2016-12-05	295	0.808219	6	0.857143	0	No		1	0	0	0	1	0	0	0	Yes
C599	2016-07-05	2017-04-18	F	Young	LMC1	MI	2017-04-11	280	0.767123	7	1	Transferd from 0188-14 Kevin Biochemistry	No		1	0	0	0	1	0	0	0	Yes	0						0
D212	2016-02-14	2016-10-18	F	Young	RBSN	MI	2016-10-11	240	0.657534	7	1	BHH for Kevin	No		1	0	0	0	1	0	0	0	Yes
X143	2016-09-01	2017-08-08	F	Young	RBSN	No MI	2017-08-01	334	0.915068	7	1	Dissection happened at the beginnig of the surgery. It was closed. Turn to the cage. Sac'd for cells	No		1	0	0	0	1	0	0	0	Yes	0						0
5001	2016-01-04	2016-07-27	F	Young	LMC2	MI	2016-07-19	197	0.539726	8	1.14286	0	No		1	0	0	0	1	0	0	0	Yes
C567	2015-12-06	2016-08-03	F	Young	*LMC2/5	MI-Procedure	2016-07-26	233	0.638356	8	1.14286	0	No		1	0	0	0	1	0	0	0	Yes
X240	2015-05-16	2016-03-08	F	Young	RBSN	MI	2016-02-29	289	0.791781	8	1.14286	0	No		1	0	0	0	1	0	0	0	Yes
X245	2016-06-16	2017-02-14	F	Young	RBSN	MI	2017-02-01	230	0.630137	13	1.85714	Histology exp. For Kevin	No		1	0	0	0	1	0	0	0	Yes	0						0
D218	2016-02-14	2016-09-26	F	Young	RBSN	MI	2016-09-12	211	0.578082	14	2	BHH for Kevin	No		1	0	0	0	1	0	0	0	Yes
D219	2016-02-14	2016-09-21	F	Young	RBSN	MI	2016-09-07	206	0.564384	14	2	BHH for Kevin	No		1	0	0	0	1	0	0	0	Yes
X161	2017-07-02	2018-02-13	F	Young	RBSN	MI	2018-01-30	212	0.580822	14	2	Postop 3 week	No		1	0	0	0	1	0	0	0	Yes	Oral	Yes	No		Oral Ami		0
5043	2016-04-30	2017-02-01	F	Young	LMC2	MI(Kevin)	2017-01-17	262	0.717808	15	2.14286	Transfer to 56-14 from 203-14, Sac. 2week for Kevin	No		1	0	0	0	1	0	0	0	Yes	0						0
1579	2007-10-01	2008-06-03	M	Young	LMC	MI/true	2008-06-02	245	0.671233	1	0.142857	VF26 Had to sac after MI due to blood loss	Can't tell		0	0	0				0	0	No
X247	2016-06-16	2017-02-22	F	Young	RBSN	MI	2017-02-07	236	0.646575	15	2.14286	Sac. For Kevin	No		1	0	0	0	1	0	0	0	Yes	0						EUT
X115	2016-07-01	2017-07-07	F	Young	RBSN	MI	2017-06-20	354	0.969863	17	2.42857	Sac. For Kevin	No		1	0	0	0	1	0	0	0	Yes	0						0
X225	2014-11-05	2015-06-02	F	Young	CHRV	MI	2015-05-13	189	0.517808	20	2.85714	formerlly CR 3703, sacrificed for histochemistry	No		1	0	0	0	1	0	0	0	Yes
3837	2013-09-01	2014-07-29	F	Young	LMC2	MI	2014-07-08	310	0.849315	21	3	biochemistry	No		1	0	0	0	1	0	0	0	Yes
4348	2013-12-14	2014-07-31	F	Young	LMC2G	MI	2014-07-10	208	0.569863	21	3	biochemistry	No		1	0	0	0	1	0	0	0	Yes
D215	2016-02-14	2017-01-25	F	Young	RBSN	MRI 12/13 and 01/18	2017-01-04	325	0.890411	21	3	Sac'd for optical mapping	No		1	0	0	0	1	0	0	0	Yes	0						0
X106	2015-10-17	2016-06-08	F	Young	RBSN	MI	2016-05-18	214	0.586301	21	3	0	No		1	0	0	0	1	0	0	0	Yes
VF0029	2007-11-15	2008-06-18	M	Young	LMC	MI/true	2008-06-18	216	0.591781	0	0	died at infarct	Can't tell		0	0	0				0	0	No
VF0033	2008-01-15	2008-08-30	M	Young	LMC	MI/true	2008-08-27	225	0.616438	3	0.428571	VF33died 3 days post coil infarct	Can't tell		0	0	0				0	0	No
X105	2015-10-17	2016-05-11	F	Young	RBSN	MI	2016-05-11	207	0.567123	0	0	Died during extubation. Koren advises exclude from study because unwitnessed death	Can't tell		0	0	0				0	0	No
X114	2016-09-01	2017-05-31	F	Young	RBSN	MI	2017-05-10	251	0.687671	21	3	Sac'd for cells	No		1	0	0	0	1	0	0	0	Yes	0						0
X219	2014-04-11	2015-02-03	F	Young	MLBK	MI	2015-01-13	277	0.758904	21	3	histology	No		1	0	0	0	1	0	0	0	Yes
X157	2017-01-01	2017-10-24	F	Young	RBSN	No-MI	2017-10-24	296	0.810959	0	0	Died during the surgery because of spasm	Can't tell		0	0	0				0	0	No	0						0
X221	2014-04-15	2015-02-19	F	Young	MLBK	MI	2015-01-29	289	0.791781	21	3	histology	No		1	0	0	0	1	0	0	0	Yes
X235	2015-05-06	2016-03-08	F	Young	RBSN	MI	2016-02-16	286	0.783562	21	3	practice ECHO 1/4/16	No		1	0	0	0	1	0	0	0	Yes
X241	2015-05-09	2016-03-15	F	Young	RBSN	MI	2016-02-23	290	0.794521	21	3	Optical Mapping	No		1	0	0	0	1	0	0	0	Yes
3871	2013-08-30	2014-06-25	F	Young	LMC2G	MI	2014-06-03	277	0.758904	22	3.14286	histology	No		1	0	0	0	1	0	0	0	Yes
3890	2013-12-16	2014-08-29	F	Young	LMC1	MI	2014-08-07	234	0.641096	22	3.14286	histology	No		1	0	0	0	1	0	0	0	Yes
1578	2007-10-01	2008-04-30	M	Young	LMC	MI/true	2008-04-30	212	0.580822	0	0	VF23 Died during MI study	Yes		0	0	0				0	0	No
1586	2007-10-01	2008-05-28	M	Young	LMC	MI/true	2008-05-28	240	0.657534	0	0	VF25 died after MI/ got thrombin	Yes		0	0	0				0	0	No
1718	2008-02-09	2008-11-24	M	Young	LMC	MI/true	2008-11-24	289	0.791781	0	0	VF45Died from Lido dose pre-infarct	Yes		0	0	0				0	0	No
5067	2016-05-01	2017-01-10	F	Young	LMC2	MI(Kevin)	2016-12-19	232	0.635616	22	3.14286	Transfer to 56-14 from 203-14	No		1	0	0	0	1	0	0	0	Yes
2031	2008-09-06	2009-04-22	M	Young	LMC	MI/true	2009-04-22	228	0.624658	0	0	Ohad/VF59died during MI procedure	Yes		0	0	0				0	0	No
0844	2007-02-17	2007-11-05	M	Young	LMC	MI/true	2007-11-05	261	0.715068	0	0	died: infarcted, VF, death=VF11	Yes		0	0	0				0	0	No
0854	2007-02-18	2007-11-26	M	Young	LMC	MI/true	2007-11-26	281	0.769863	0	0	VF12 died after induced MI	Yes		0	0	0				0	0	No
0879	2007-03-24	2007-10-18	F	Young	LMC	MI/true	2007-10-18	208	0.569863	0	0	Ohad VF 10	Yes		0	0	0				0	0	No
1585	2007-10-01	2008-06-30	M	Young	LMC	MI/true	2008-06-04	247	0.676712	26	3.71429	VF27 Chronic infarct	Can't tell		1	0	0				0	0	No
1705	2008-02-08	2008-10-03	M	Young	LMC	MI/true	2008-09-10	215	0.589041	23	3.28571	VF36 coil infarct	Can't tell		1	0	0				0	0	No
1716	2008-02-09	2008-10-30	M	Young	LMC	MI/true	2008-09-25	229	0.627397	35	5	VF37 coil infarct	Can't tell		1	0	0				0	0	No
1814	2008-05-15	2008-12-12	M	Young	LMC	MI/true	2008-11-20	189	0.517808	22	3.14286	VF44 chronic infarct	Can't tell		1	0	0				0	0	No
2002	2008-09-06	2009-08-21	M	Young	LMC	MI/true	2009-07-29	326	0.893151	23	3.28571	TSM only; Ohad/VF69	Can't tell		1	0	0				0	0	No
2066	2008-09-05	2009-07-28	M	Young	LMC	MI/true	2009-07-02	300	0.821918	26	3.71429	Ohad/VF65	Can't tell		1	0	0				0	0	No
2067	2008-09-05	2009-08-14	M	Young	LMC	MI/true	2009-07-22	320	0.876712	23	3.28571	Ohad/VF67	Can't tell		1	0	0				0	0	No
2107	2008-12-22	2009-12-04	M	Young	LMC	MI/true	2009-11-09	322	0.882192	25	3.57143	Ohad/VF78	Can't tell		1	0	0				0	0	No
2570	2009-07-12	2010-01-22	M	Young	LMC	MI/true	2009-12-31	172	0.471233	22	3.14286	Ohad VF82 MI	Can't tell		1	0	0				0	0	No
2590	2009-11-06	2010-07-22	M	Young	LMC	MI/true	2010-06-23	229	0.627397	29	4.14286	TSM only; OZ/VFB VF94 MI	Can't tell		1	0	0				0	0	No
2591	2009-11-06	2010-07-30	M	Young	LMC	MI/true	2010-06-24	230	0.630137	36	5.14286	TSM only; OZ/VFB VF95 MI	Can't tell		1	0	0				0	0	No
D214	2016-02-14	2017-01-11	F	Young	RBSN	MRI 12/06	2016-12-20	310	0.849315	22	3.14286	Sac'd for optical mapping	No		1	0	0	0	1	0	0	0	Yes
X220	2014-04-15	2015-02-06	F	Young	MLBK	MI	2015-01-15	275	0.753425	22	3.14286	histology	No		1	0	0	0	1	0	0	0	Yes
X228	2015-03-05	2015-11-18	F	Young	RBSN	MI	2015-10-27	236	0.646575	22	3.14286	Histology	No		1	0	0	0	1	0	0	0	Yes
X234	2015-05-16	2016-03-29	F	Young	RBSN	MI	2016-03-07	296	0.810959	22	3.14286	Optical Mapping	No		1	0	0	0	1	0	0	0	Yes
X104	2015-10-17	2016-06-08	F	Young	RBSN	MI	2016-05-16	212	0.580822	23	3.28571	0	No		1	0	0	0	1	0	0	0	Yes
X107	2015-10-17	2016-06-15	F	Young	RBSN	MI	2016-05-23	219	0.6	23	3.28571	0	No		1	0	0	0	1	0	0	0	Yes
X230	2015-03-05	2015-12-10	F	Young	RBSN	MI	2015-11-17	257	0.70411	23	3.28571	Histology	No		1	0	0	0	1	0	0	0	Yes	Pump						0
X248	2016-06-16	2017-02-06	F	Young	RBSN	MI	2017-01-11	209	0.572603	26	3.71429	To lab for optical mapping	No		1	0	0	0	1	0	0	0	Yes	0						0
3707	2012-12-20	2013-11-27	F	Young	LMC2	MI	2013-10-29	313	0.857534	29	4.14286	practice MI for cell isolation	No		1	0	0	0	1	0	0	0	Yes
C598	2016-07-05	2017-01-10	F	Young	LMC1	MI	2016-12-12	160	0.438356	29	4.14286	Transferd from 0188-14 Sac'd for tissue	No		1	0	0	0	1	0	0	0	Yes
X146	2017-07-02	2018-02-13	F	Young	RBSN	MI	2018-01-09	191	0.523288	35	5	Postop 5week	No		1	0	0	0	1	0	0	0	Yes	Oral	No	No		Oral Ami		0
X203	2018-01-22	2019-01-02	F	Young	RBSN	MI	2018-10-09	260	0.712329	85	12.1429	ECHO (9/07/2018), BHH 12 Weeks (Brett)	No		1	0	0	0	1	0	0	0	Yes	Pump	No	No		Pump		0
X205	2018-01-22	2018-12-06	F	Young	RBSN	MI	2018-09-12	233	0.638356	85	12.1429	BHH 12 Weeks POST-MI (Brett)	No		1	0	0	0	1	0	0	0	Yes	Pump	Yes	No		Pump		0
X226	2014-11-05	2015-05-20	F	Young	CHRV	MI	2015-05-19	195	0.534247	1	0.142857	formerly CR 3702, found dead 5/20, prob arrhythmia	Yes	Yes	0	0	0	1	0	0	1	0	Yes	Pump	Yes	Yes	No	Pump	This week animal	0
2597	2009-11-06	2010-05-26	M	Young	LMC	MI/true	2010-05-26	201	0.550685	0	0	VF90 MI acute/TTC	Yes		1	0	0				0	0	No
D217	2016-02-14	2016-09-28	F	Young	RBSN	MI	2016-09-27	226	0.619178	1	0.142857	MI, Rabbit was found dies next morning.	Yes	Yes	0	0	0	1	0	0	1	0	Yes
X238	2015-05-02	2016-02-04	F	Young	RBSN	MI	2016-02-02	276	0.756164	2	0.285714	Died from VT 36 hours after MI	Yes	Yes	0	0	0	1	0	0	1	0	Yes
X110	2015-10-17	2016-06-01	F	Young	RBSN	MI	2016-06-01	228	0.624658	0	0	Coil too high. VF after 10 minutes.	Yes	No	0	1	0	0	0	0	0	0	Yes
X166	2017-07-02	2018-01-10	F	Young	RBSN	MI	2018-01-10	192	0.526027	0	0	Died during the surgery, VF.	Yes	No	0	1	0	0	0	0	0	0	Yes	0						0
X204	2018-01-22	2018-09-05	F	Young	RBSN	MI	2018-09-05	226	0.619178	0	0	Died during the surgery	Yes	No	0	1	0	0	0	0	0	0	Yes	0						0
X239	2015-05-16	2016-02-09	F	Young	RBSN	MI	2016-02-09	269	0.736986	0	0	Left Main Spasm During MI. Died due to VF	Yes	No	0	1	0	0	0	0	0	0	Yes
2701	2009-11-06	2010-05-25	M	Young	LMC	MI/true	2010-05-25	200	0.547945	0	0	VF89 MI acute/TTC	Yes		1	0	0				0	0	No
3892	2013-12-16	2014-08-19	F	Young	LMC1	MI	2014-08-19	246	0.673973	0	0	died, VT after coil	Yes	No	0	1	0	0	0	0	0	0	Yes
D213	2016-02-14	2016-11-29	F	Young	RBSN	MRI 11/01	2016-11-29	289	0.791781	0	0	Dead during the surgery	Yes	No	0	1	0	0	0	0	0	0	Yes
X215	2014-05-05	2015-02-23	F	Young	RBSN	young MI	2015-02-23	294	0.805479	0	0	VT/VF @ MI	Yes	No	0	1	0	0	0	0	0	0	Yes
X237	2015-05-02	2016-02-01	F	Young	RBSN	MI	2016-02-01	275	0.753425	0	0	Died from VT 5 minutes after coil	Yes	No	0	1	0	0	0	0	0	0	Yes
X103	2015-12-06	2016-08-03	F	Young	*LMC2/5	MI-procedure	2016-07-27	234	0.641096	7	1	Formerly C575, ear tag fell off	Yes	Yes	1	0	0	1	0	0	0	0	Yes
X111	2015-10-17	2016-06-22	F	Young	RBSN	MI	2016-06-01	228	0.624658	21	3	Sac'd for 21 day Biochemistry	Yes	Yes	1	0	0	1	0	0	0	0	Yes
VF0030	2007-11-15	2008-08-01	M	Young	LMC	MI/true	2008-07-09	237	0.649315	23	3.28571	0	Can't tell		1	0	0				0	0	No
VF0032	2007-12-15	2008-08-13	M	Young	LMC	MI/true	2008-08-04	233	0.638356	9	1.28571	Ziv/VF32 Coil Infarct	Can't tell		1	0	0				0	0	No
VF0038	2008-01-20	2009-01-20	M	Young	LMC	MI/true	2008-12-17	332	0.909589	34	4.85714	Ziv/VF38 MI	Can't tell		1	0	0				0	0	No
VF0039	2008-01-20	2009-01-16	M	Young	LMC	MI/true	2008-12-15	330	0.90411	32	4.57143	Ziv/VF39 MI	Can't tell		1	0	0				0	0	No
X108	2015-10-17	2016-06-15	F	Young	RBSN	MI	2016-05-24	220	0.60274	22	3.14286	0	Yes	Yes	1	0	0	1	0	0	0	0	Yes
X210	2018-01-22	2018-10-25	F	Young	RBSN	MI	2018-10-24	275	0.753425	1	0.142857	The pump could not placement because the issue of entubation. Foun dead next day	Yes	Yes	0	0	0	1	0	0	1	0	Yes	None	Yes	Yes	No	No treatment (Died)	(no pump) The pump could not place respiratory problem	0
91442	2018-01-22	2019-02-04	F	Young	RBSN	MI	2018-11-14	296	0.810959	82	11.7143	BHH for Brett	Yes	Yes	1	0	0	1	0	0	0	0	Yes	Pump	No	Yes	Yes	Pump		0
X209	2018-01-22	2019-01-02	F	Young	RBSN	MI	2018-10-10	261	0.715068	84	12	BHH 12 Weeks (Brett)	Yes	Yes	1	0	0	1	0	0	0	0	Yes	Pump	No	Yes	No	Pump		0
1576	2007-10-01	2008-03-10	M	Young	LMC	MI/true	2008-02-13	135	0.369863	26	3.71429	VF17 inf coil	Can't tell			0	0				0	0	No
F911	#N/A	#N/A	#N/A	#N/A	#N/A	#N/A	#N/A	#N/A	#N/A	#N/A	#N/A	#N/A				#N/A	#N/A				#N/A	#N/A	No	Pump						0
