# Supplementary material for: Myofibroblast senescence promotes arrhythmogenic remodeling in the aged infarcted rabbit heart
Source: eLife. 2023 May 19;12:e84088. doi: 10.7554/eLife.84088 (PMC10259375; doi:10.7554/eLife.84088)
Supplement: Figure 2—source data 1. — Each tab contains raw data for the corresponding panel of Figure 2. [file elife-84088-fig2-data1.xlsx]

## Sheet: Panel A
Rabbit ID	Age Group	Weeks post-MI	Scar Area (px)	Total Heart Area (px)	Scar Area Fraction (%)
CH233	Aged	1	10097	44130	22.8801
CH311	Aged	1	10072	36904	27.2924
F981	Aged	1	63341	179120	35.3623
X020	Aged	1	80599	208209	38.7106
F184	Aged	2	49982	137843	36.2601
F322	Aged	2	17823	46035	38.7162
F949	Aged	2	51364	157479	32.6164
H962	Aged	2	35407	73221	48.3563
F427	Aged	3	24288	80108	30.3191
R126	Aged	3	24652	56558	43.5871
R4304	Aged	3	24410	88944	27.4442
R485	Aged	3	533	2636	20.22
X227	Aged	3	35541	141760	25.0712
B1149	Aged	12	11335	38703	29.2871
F894	Aged	12	20851	63555	32.8078
F985	Aged	12	38719	99606	38.8722
S1165	Aged	12	7577	13803	54.8939
5001	Young	1	27017	88675	30.4674
D212	Young	1	28733	67643	42.4774
D216	Young	1	98043	178961	54.7846
X103	Young	1	16574	36924	44.8868
5043	Young	2	27294	131807	20.7075
D218	Young	2	14002	30818	45.4345
X245	Young	2	36664	119035	30.801
X247	Young	2	15467	37233	41.5411
3871	Young	3	12992	18102	71.7711
X104	Young	3	19096	39698	48.1032
X106	Young	3	39855	99916	39.8885
X219	Young	3	23524	89594	26.2562
X225	Young	3	14679	48833	30.0596
X164	Young	12	2297	21657	10.6063
X203	Young	12	25851	60645	42.6268
X205	Young	12	31678	58345	54.2943
X209	Young	12	11424	28919	39.5034

## Sheet: Panel B
Rabbit ID	Age Group	Weeks post-MI	Slide #	Stain Type	Protrusion Length
CH233	Aged	1	10	aSMA IHC	2072.06
CH233	Aged	1	10	aSMA IHC	1162.4
CH233	Aged	1	10	aSMA IHC	1412.87
CH233	Aged	1	10	aSMA IHC	534.79
CH233	Aged	1	10	aSMA IHC	1026.12
CH233	Aged	1	10	aSMA IHC	300.67
CH233	Aged	1	10	aSMA IHC	1006.18
CH233	Aged	1	10	aSMA IHC	3969.78
CH233	Aged	1	10	aSMA IHC	931.41
CH233	Aged	1	10	aSMA IHC	1002.06
CH233	Aged	1	10	aSMA IHC	277.5
CH233	Aged	1	12	CD68 IHC	808.57
CH233	Aged	1	12	CD68 IHC	442.01
CH233	Aged	1	12	CD68 IHC	195.37
CH233	Aged	1	12	CD68 IHC	495.8
CH233	Aged	1	12	CD68 IHC	587.11
CH233	Aged	1	12	CD68 IHC	439.72
CH233	Aged	1	12	CD68 IHC	234.84
CH233	Aged	1	12	CD68 IHC	386.36
CH233	Aged	1	12	CD68 IHC	777.16
CH233	Aged	1	12	CD68 IHC	466.78
CH233	Aged	1	12	CD68 IHC	292.22
CH233	Aged	1	12	CD68 IHC	465.08
CH233	Aged	1	12	CD68 IHC	1527.24
CH233	Aged	1	12	CD68 IHC	1016.28
CH233	Aged	1	12	CD68 IHC	797.61
CH233	Aged	1	12	CD68 IHC	189.88
CH233	Aged	1	12	CD68 IHC	273.68
CH233	Aged	1	12	CD68 IHC	463.76
CH233	Aged	1	12	CD68 IHC	698.81
CH233	Aged	1	12	CD68 IHC	577.43
CH233	Aged	1	12	CD68 IHC	740.42
CH233	Aged	1	12	CD68 IHC	437.43
CH233	Aged	1	12	CD68 IHC	430.15
CH233	Aged	1	12	CD68 IHC	486.24
CH233	Aged	1	12	CD68 IHC	161.22
CH233	Aged	1	12	CD68 IHC	202.2
CH233	Aged	1	12	CD68 IHC	476.55
CH233	Aged	1	12	CD68 IHC	401.59
CH233	Aged	1	12	CD68 IHC	354.15
CH233	Aged	1	12	CD68 IHC	617.52
CH233	Aged	1	12	CD68 IHC	563.27
CH233	Aged	1	12	CD68 IHC	586.7
CH233	Aged	1	13	SABgal	787.48
CH233	Aged	1	13	SABgal	464.69
CH233	Aged	1	13	SABgal	661.85
CH233	Aged	1	13	SABgal	451.37
CH233	Aged	1	13	SABgal	229.8
CH233	Aged	1	13	SABgal	263.07
CH233	Aged	1	13	SABgal	566.31
CH233	Aged	1	13	SABgal	536.66
CH233	Aged	1	13	SABgal	243.94
CH233	Aged	1	13	SABgal	505.06
CH233	Aged	1	13	SABgal	380.4
CH233	Aged	1	13	SABgal	267.37
CH233	Aged	1	13	SABgal	111.14
CH233	Aged	1	13	SABgal	465.47
CH233	Aged	1	13	SABgal	724.4
CH233	Aged	1	13	SABgal	272.67
CH233	Aged	1	13	SABgal	265.85
CH233	Aged	1	13	SABgal	190.82
CH233	Aged	1	13	SABgal	265.21
CH233	Aged	1	13	SABgal	359.19
CH233	Aged	1	13	SABgal	94.7
CH233	Aged	1	13	SABgal	394.42
CH233	Aged	1	13	SABgal	4.11
CH233	Aged	1	13	SABgal	199.53
CH233	Aged	1	13	SABgal	444.25
CH233	Aged	1	13	SABgal	351.86
CH233	Aged	1	13	SABgal	381.72
CH233	Aged	1	13	SABgal	596.12
CH233	Aged	1	13	SABgal	624.32
CH233	Aged	1	13	SABgal	889.17
CH233	Aged	1	13	SABgal	547.86
CH233	Aged	1	13	SABgal	563.9
CH233	Aged	1	13	SABgal	1011.13
CH233	Aged	1	13	SABgal	1011.13
CH233	Aged	1	15	Trichrome	1937.64
CH233	Aged	1	15	Trichrome	621.82
CH233	Aged	1	15	Trichrome	363.51
CH233	Aged	1	15	Trichrome	963.83
CH233	Aged	1	15	Trichrome	360.38
CH233	Aged	1	15	Trichrome	617.29
CH233	Aged	1	15	Trichrome	414.42
CH233	Aged	1	15	Trichrome	217.6
CH233	Aged	1	15	Trichrome	1063.69
CH233	Aged	1	15	Trichrome	312.97
CH233	Aged	1	15	Trichrome	160.59
CH233	Aged	1	15	Trichrome	788.41
CH233	Aged	1	15	Trichrome	527.06
CH233	Aged	1	15	Trichrome	269.65
CH233	Aged	1	15	Trichrome	560.58
CH233	Aged	1	15	Trichrome	442.38
CH233	Aged	1	15	Trichrome	611.64
CH233	Aged	1	15	Trichrome	332.12
CH233	Aged	1	15	Trichrome	454.05
CH233	Aged	1	15	Trichrome	580.23
CH233	Aged	1	15	Trichrome	615.97
CH233	Aged	1	15	Trichrome	331.55
CH233	Aged	1	15	Trichrome	349.32
CH233	Aged	1	15	Trichrome	416.33
CH233	Aged	1	15	Trichrome	489.67
CH233	Aged	1	15	Trichrome	833.62
CH233	Aged	1	15	Trichrome	736.05
CH311	Aged	1	18	aSMA IHC	435.66
CH311	Aged	1	18	aSMA IHC	288.19
CH311	Aged	1	18	aSMA IHC	464.19
CH311	Aged	1	18	aSMA IHC	439.72
CH311	Aged	1	18	aSMA IHC	253.05
CH311	Aged	1	18	aSMA IHC	757.02
CH311	Aged	1	18	aSMA IHC	291.16
CH311	Aged	1	18	aSMA IHC	495.83
CH311	Aged	1	18	aSMA IHC	232.49
CH311	Aged	1	18	aSMA IHC	817.63
CH311	Aged	1	18	aSMA IHC	274.62
CH311	Aged	1	18	aSMA IHC	1318.98
CH311	Aged	1	18	aSMA IHC	472.06
CH311	Aged	1	18	aSMA IHC	1074.51
CH311	Aged	1	18	aSMA IHC	212.93
CH311	Aged	1	18	aSMA IHC	220.02
CH311	Aged	1	18	aSMA IHC	1310.52
CH311	Aged	1	18	aSMA IHC	361.71
CH311	Aged	1	18	aSMA IHC	376.73
CH311	Aged	1	18	aSMA IHC	394.48
CH311	Aged	1	18	aSMA IHC	530.7
CH311	Aged	1	18	aSMA IHC	271.47
CH311	Aged	1	18	aSMA IHC	947.07
CH311	Aged	1	18	aSMA IHC	222.18
CH311	Aged	1	18	aSMA IHC	279.46
CH311	Aged	1	18	aSMA IHC	227.11
CH311	Aged	1	18	aSMA IHC	290.84
CH311	Aged	1	18	aSMA IHC	242.85
CH311	Aged	1	18	aSMA IHC	595.47
CH311	Aged	1	18	aSMA IHC	288.06
CH311	Aged	1	18	aSMA IHC	136.91
CH311	Aged	1	18	aSMA IHC	176.42
CH311	Aged	1	18	aSMA IHC	284.9
CH311	Aged	1	18	aSMA IHC	612.69
CH311	Aged	1	18	aSMA IHC	244.96
CH311	Aged	1	18	aSMA IHC	786.62
CH311	Aged	1	18	aSMA IHC	492.74
CH311	Aged	1	18	aSMA IHC	319.3
CH311	Aged	1	18	aSMA IHC	865.91
CH311	Aged	1	18	aSMA IHC	455.38
CH311	Aged	1	18	aSMA IHC	189.08
CH311	Aged	1	18	aSMA IHC	356.7
CH311	Aged	1	18	aSMA IHC	414.42
CH311	Aged	1	18	aSMA IHC	129.45
CH311	Aged	1	18	aSMA IHC	327
CH311	Aged	1	18	aSMA IHC	457.67
CH311	Aged	1	18	aSMA IHC	376.57
CH311	Aged	1	18	aSMA IHC	293.04
CH311	Aged	1	18	aSMA IHC	321.65
CH311	Aged	1	18	aSMA IHC	713.79
CH311	Aged	1	18	aSMA IHC	646.52
CH311	Aged	1	18	aSMA IHC	75.41
CH311	Aged	1	18	aSMA IHC	114.38
CH311	Aged	1	18	aSMA IHC	432.77
CH311	Aged	1	18	aSMA IHC	807.06
CH311	Aged	1	18	aSMA IHC	138.74
CH311	Aged	1	18	aSMA IHC	290.28
CH311	Aged	1	18	aSMA IHC	573.6
CH311	Aged	1	18	aSMA IHC	241.6
CH311	Aged	1	18	aSMA IHC	241.19
CH311	Aged	1	18	aSMA IHC	441.01
CH311	Aged	1	18	aSMA IHC	163.77
CH311	Aged	1	18	aSMA IHC	136.91
CH311	Aged	1	18	aSMA IHC	450.66
CH311	Aged	1	18	aSMA IHC	333.1
CH311	Aged	1	18	aSMA IHC	360.38
CH311	Aged	1	18	aSMA IHC	170.54
CH311	Aged	1	18	aSMA IHC	640.16
CH311	Aged	1	18	aSMA IHC	296.62
CH311	Aged	1	18	aSMA IHC	336.11
CH311	Aged	1	18	aSMA IHC	423.37
CH311	Aged	1	18	aSMA IHC	597.41
CH311	Aged	1	18	aSMA IHC	1018.69
CH311	Aged	1	18	aSMA IHC	1211.92
CH311	Aged	1	18	aSMA IHC	1279.24
CH311	Aged	1	18	aSMA IHC	251.9
CH311	Aged	1	18	aSMA IHC	461.5
CH311	Aged	1	18	aSMA IHC	328.5
CH311	Aged	1	19	CD68 IHC	518.03
CH311	Aged	1	19	CD68 IHC	289.93
CH311	Aged	1	19	CD68 IHC	173.9
CH311	Aged	1	19	CD68 IHC	264.71
CH311	Aged	1	19	CD68 IHC	729.82
CH311	Aged	1	19	CD68 IHC	583.67
CH311	Aged	1	19	CD68 IHC	283.93
CH311	Aged	1	19	CD68 IHC	799.83
CH311	Aged	1	19	CD68 IHC	590.31
CH311	Aged	1	19	CD68 IHC	1213.21
CH311	Aged	1	19	CD68 IHC	413.63
CH311	Aged	1	19	CD68 IHC	1111.56
CH311	Aged	1	19	CD68 IHC	280.4
CH311	Aged	1	19	CD68 IHC	940.04
CH311	Aged	1	19	CD68 IHC	995.36
CH311	Aged	1	19	CD68 IHC	571.78
CH311	Aged	1	19	CD68 IHC	928.3
CH311	Aged	1	19	CD68 IHC	289.37
CH311	Aged	1	19	CD68 IHC	336.11
CH311	Aged	1	19	CD68 IHC	431.32
CH311	Aged	1	19	CD68 IHC	375.43
CH311	Aged	1	19	CD68 IHC	544.07
CH311	Aged	1	19	CD68 IHC	467.22
CH311	Aged	1	19	CD68 IHC	395.88
CH311	Aged	1	19	CD68 IHC	466.6
CH311	Aged	1	19	CD68 IHC	660.61
CH311	Aged	1	19	CD68 IHC	562.6
CH311	Aged	1	19	CD68 IHC	427.54
CH311	Aged	1	19	CD68 IHC	756.37
CH311	Aged	1	19	CD68 IHC	504.5
CH311	Aged	1	19	CD68 IHC	361.78
CH311	Aged	1	19	CD68 IHC	293.04
CH311	Aged	1	19	CD68 IHC	332.16
CH311	Aged	1	19	CD68 IHC	282.9
CH311	Aged	1	19	CD68 IHC	506.72
CH311	Aged	1	19	CD68 IHC	359.09
CH311	Aged	1	19	CD68 IHC	574.76
CH311	Aged	1	19	CD68 IHC	271.28
CH311	Aged	1	19	CD68 IHC	531.44
CH311	Aged	1	19	CD68 IHC	584.14
CH311	Aged	1	19	CD68 IHC	192.97
CH311	Aged	1	19	CD68 IHC	377.04
CH311	Aged	1	19	CD68 IHC	224.32
CH311	Aged	1	19	CD68 IHC	1130.73
CH311	Aged	1	19	CD68 IHC	609.5
CH311	Aged	1	19	CD68 IHC	227.5
CH311	Aged	1	19	CD68 IHC	1259.19
CH311	Aged	1	19	CD68 IHC	528.21
CH311	Aged	1	19	CD68 IHC	794.7
CH311	Aged	1	19	CD68 IHC	668.16
CH311	Aged	1	19	CD68 IHC	291.83
CH311	Aged	1	19	CD68 IHC	627.66
CH311	Aged	1	19	CD68 IHC	145.55
CH311	Aged	1	19	CD68 IHC	280.63
CH311	Aged	1	19	CD68 IHC	421.02
CH311	Aged	1	19	CD68 IHC	305.11
CH311	Aged	1	19	CD68 IHC	159.96
CH311	Aged	1	19	CD68 IHC	403.34
CH311	Aged	1	19	CD68 IHC	166.74
CH311	Aged	1	19	CD68 IHC	463.67
CH311	Aged	1	19	CD68 IHC	428.01
CH311	Aged	1	19	CD68 IHC	548.21
CH311	Aged	1	19	CD68 IHC	182.59
CH311	Aged	1	19	CD68 IHC	150.31
CH311	Aged	1	19	CD68 IHC	469.53
CH311	Aged	1	19	CD68 IHC	143.64
CH311	Aged	1	20	SABgal	389.55
CH311	Aged	1	20	SABgal	126.97
CH311	Aged	1	20	SABgal	182.77
CH311	Aged	1	20	SABgal	243.8
CH311	Aged	1	20	SABgal	664.85
CH311	Aged	1	20	SABgal	650.59
CH311	Aged	1	20	SABgal	769.89
CH311	Aged	1	20	SABgal	1403.6
CH311	Aged	1	20	SABgal	348.72
CH311	Aged	1	20	SABgal	877.49
CH311	Aged	1	20	SABgal	207.9
CH311	Aged	1	20	SABgal	1516.34
CH311	Aged	1	20	SABgal	1033.61
CH311	Aged	1	20	SABgal	337.8
CH311	Aged	1	20	SABgal	1480.44
CH311	Aged	1	20	SABgal	258.18
CH311	Aged	1	20	SABgal	738.04
CH311	Aged	1	20	SABgal	1120.72
CH311	Aged	1	20	SABgal	427.89
CH311	Aged	1	20	SABgal	444.06
CH311	Aged	1	20	SABgal	390.13
CH311	Aged	1	20	SABgal	985.89
CH311	Aged	1	20	SABgal	498.22
CH311	Aged	1	20	SABgal	843.87
CH311	Aged	1	20	SABgal	233.69
CH311	Aged	1	20	SABgal	437.97
CH311	Aged	1	20	SABgal	469.87
CH311	Aged	1	20	SABgal	378.13
CH311	Aged	1	20	SABgal	1206.42
CH311	Aged	1	20	SABgal	627.07
CH311	Aged	1	20	SABgal	321.71
CH311	Aged	1	20	SABgal	275.62
CH311	Aged	1	20	SABgal	591.21
CH311	Aged	1	20	SABgal	456.19
CH311	Aged	1	20	SABgal	234.56
CH311	Aged	1	20	SABgal	468.26
CH311	Aged	1	20	SABgal	692.87
CH311	Aged	1	20	SABgal	629.49
CH311	Aged	1	20	SABgal	184.25
CH311	Aged	1	20	SABgal	196.78
CH311	Aged	1	20	SABgal	260.33
CH311	Aged	1	20	SABgal	266.38
CH311	Aged	1	20	SABgal	153.28
CH311	Aged	1	20	SABgal	158.4
CH311	Aged	1	20	SABgal	277.83
CH311	Aged	1	20	SABgal	537.36
CH311	Aged	1	20	SABgal	573.96
CH311	Aged	1	20	SABgal	529.77
CH311	Aged	1	20	SABgal	297.48
CH311	Aged	1	20	SABgal	709.2
CH311	Aged	1	20	SABgal	416
CH311	Aged	1	20	SABgal	871.94
CH311	Aged	1	20	SABgal	765.47
CH311	Aged	1	20	SABgal	1079.67
CH311	Aged	1	20	SABgal	477
CH311	Aged	1	20	SABgal	454.68
CH311	Aged	1	20	SABgal	454.68
CH311	Aged	1	14	Trichrome	580.17
CH311	Aged	1	14	Trichrome	183.68
CH311	Aged	1	14	Trichrome	707.42
CH311	Aged	1	14	Trichrome	210.73
CH311	Aged	1	14	Trichrome	318.86
CH311	Aged	1	14	Trichrome	1273.92
CH311	Aged	1	14	Trichrome	302.46
CH311	Aged	1	14	Trichrome	291.83
CH311	Aged	1	14	Trichrome	605.03
CH311	Aged	1	14	Trichrome	698.31
CH311	Aged	1	14	Trichrome	334.72
CH311	Aged	1	14	Trichrome	366.2
CH311	Aged	1	14	Trichrome	713.14
CH311	Aged	1	14	Trichrome	761.41
CH311	Aged	1	14	Trichrome	351.16
CH311	Aged	1	14	Trichrome	553.69
CH311	Aged	1	14	Trichrome	669.44
CH311	Aged	1	14	Trichrome	488.82
CH311	Aged	1	14	Trichrome	417.63
CH311	Aged	1	14	Trichrome	716.6
CH311	Aged	1	14	Trichrome	1339.31
CH311	Aged	1	14	Trichrome	644
CH311	Aged	1	14	Trichrome	480.31
CH311	Aged	1	14	Trichrome	414.51
CH311	Aged	1	14	Trichrome	779.82
CH311	Aged	1	14	Trichrome	683.72
CH311	Aged	1	14	Trichrome	1037.38
CH311	Aged	1	14	Trichrome	856.91
CH311	Aged	1	14	Trichrome	543.03
CH311	Aged	1	14	Trichrome	454.5
CH311	Aged	1	14	Trichrome	338.2
CH311	Aged	1	14	Trichrome	484.58
CH311	Aged	1	14	Trichrome	311.15
CH311	Aged	1	14	Trichrome	204.74
CH311	Aged	1	14	Trichrome	334.31
CH311	Aged	1	14	Trichrome	264
CH311	Aged	1	14	Trichrome	181.69
CH311	Aged	1	14	Trichrome	121.42
CH311	Aged	1	14	Trichrome	556.21
CH311	Aged	1	14	Trichrome	396.64
CH311	Aged	1	14	Trichrome	396.87
CH311	Aged	1	14	Trichrome	724.89
CH311	Aged	1	14	Trichrome	467.03
F981	Aged	1	43	aSMA IHC	358.67
F981	Aged	1	43	aSMA IHC	427.1
F981	Aged	1	43	aSMA IHC	626.52
F981	Aged	1	43	aSMA IHC	1099.13
F981	Aged	1	43	aSMA IHC	466.68
F981	Aged	1	43	aSMA IHC	494.02
F981	Aged	1	43	aSMA IHC	845.03
F981	Aged	1	43	aSMA IHC	850.55
F981	Aged	1	43	aSMA IHC	721.76
F981	Aged	1	43	aSMA IHC	764.87
F981	Aged	1	43	aSMA IHC	681.95
F981	Aged	1	43	aSMA IHC	1773.85
F981	Aged	1	43	aSMA IHC	541.22
F981	Aged	1	43	aSMA IHC	468
F981	Aged	1	43	aSMA IHC	270.12
F981	Aged	1	43	aSMA IHC	226.61
F981	Aged	1	43	aSMA IHC	241.03
F981	Aged	1	43	aSMA IHC	327.31
F981	Aged	1	41	CD68 IHC	237.93
F981	Aged	1	41	CD68 IHC	309.86
F981	Aged	1	41	CD68 IHC	197.23
F981	Aged	1	41	CD68 IHC	279.19
F981	Aged	1	41	CD68 IHC	309.41
F981	Aged	1	41	CD68 IHC	190.67
F981	Aged	1	41	CD68 IHC	886.19
F981	Aged	1	41	CD68 IHC	1220.45
F981	Aged	1	41	CD68 IHC	455.46
F981	Aged	1	41	CD68 IHC	515.28
F981	Aged	1	41	CD68 IHC	773.21
F981	Aged	1	41	CD68 IHC	509.59
F981	Aged	1	41	CD68 IHC	496.61
F981	Aged	1	41	CD68 IHC	463.21
F981	Aged	1	41	CD68 IHC	908.57
F981	Aged	1	41	CD68 IHC	802.43
F981	Aged	1	41	CD68 IHC	315.31
F981	Aged	1	41	CD68 IHC	187.46
F981	Aged	1	41	CD68 IHC	647.06
F981	Aged	1	41	CD68 IHC	422.23
F981	Aged	1	41	CD68 IHC	500.81
F981	Aged	1	41	CD68 IHC	275.47
F981	Aged	1	41	CD68 IHC	275.93
F981	Aged	1	41	CD68 IHC	101.57
F981	Aged	1	41	CD68 IHC	433.04
F981	Aged	1	41	CD68 IHC	194.79
F981	Aged	1	41	CD68 IHC	387.63
F981	Aged	1	41	CD68 IHC	271.28
F981	Aged	1	41	CD68 IHC	274.42
F981	Aged	1	41	CD68 IHC	144.42
F981	Aged	1		SABgal	277.02
F981	Aged	1		SABgal	383.23
F981	Aged	1		SABgal	235.36
F981	Aged	1		SABgal	277.18
F981	Aged	1		SABgal	226.16
F981	Aged	1		SABgal	212.76
F981	Aged	1		SABgal	357.24
F981	Aged	1		SABgal	464.08
F981	Aged	1		SABgal	272.28
F981	Aged	1		SABgal	833.95
F981	Aged	1		SABgal	792.7
F981	Aged	1		SABgal	542.67
F981	Aged	1		SABgal	700.79
F981	Aged	1		SABgal	991.06
F981	Aged	1		SABgal	806.87
F981	Aged	1	12	Trichrome	795.63
F981	Aged	1	12	Trichrome	512.05
F981	Aged	1	12	Trichrome	808.71
F981	Aged	1	12	Trichrome	281.34
F981	Aged	1	12	Trichrome	153.54
F981	Aged	1	12	Trichrome	512.52
F981	Aged	1	12	Trichrome	374.32
F981	Aged	1	12	Trichrome	355.15
F981	Aged	1	12	Trichrome	201.2
F981	Aged	1	12	Trichrome	431.64
F981	Aged	1	12	Trichrome	150.56
F981	Aged	1	12	Trichrome	231.61
F981	Aged	1	12	Trichrome	233.61
F981	Aged	1	12	Trichrome	195.17
F981	Aged	1	12	Trichrome	514.28
F981	Aged	1	12	Trichrome	700.32
F981	Aged	1	12	Trichrome	741.03
F981	Aged	1	12	Trichrome	1254.04
F981	Aged	1	12	Trichrome	767.46
X020	Aged	1	11	CD68 IHC	492.92
X020	Aged	1	11	CD68 IHC	837.73
X020	Aged	1	11	CD68 IHC	2055.07
X020	Aged	1	11	CD68 IHC	595.22
X020	Aged	1	11	CD68 IHC	808.81
X020	Aged	1	11	CD68 IHC	1889.65
X020	Aged	1	11	CD68 IHC	190.67
X020	Aged	1	11	CD68 IHC	672.61
X020	Aged	1	11	CD68 IHC	818.76
X020	Aged	1	11	CD68 IHC	652.56
X020	Aged	1	11	CD68 IHC	892.93
X020	Aged	1	11	CD68 IHC	607.95
X020	Aged	1	11	CD68 IHC	652.08
X020	Aged	1	11	CD68 IHC	189.08
X020	Aged	1	11	CD68 IHC	658.15
X020	Aged	1	11	CD68 IHC	872.16
X020	Aged	1	11	CD68 IHC	903.16
X020	Aged	1	11	CD68 IHC	341.12
X020	Aged	1	11	CD68 IHC	270.12
X020	Aged	1	11	CD68 IHC	749.72
X020	Aged	1	11	CD68 IHC	546.84
X020	Aged	1	11	CD68 IHC	669.16
X020	Aged	1	11	CD68 IHC	1635.49
X020	Aged	1	11	CD68 IHC	1503.84
X020	Aged	1	11	CD68 IHC	1797.64
X020	Aged	1	11	CD68 IHC	417.26
X020	Aged	1	11	CD68 IHC	1704.22
X020	Aged	1	11	CD68 IHC	817.24
X020	Aged	1	11	CD68 IHC	445.63
X020	Aged	1	11	CD68 IHC	754.8
X020	Aged	1	11	CD68 IHC	590.12
X020	Aged	1	11	CD68 IHC	498.43
X020	Aged	1	11	CD68 IHC	322.43
X020	Aged	1	11	CD68 IHC	422.36
X020	Aged	1	11	CD68 IHC	118.38
X020	Aged	1	11	CD68 IHC	914.52
X020	Aged	1	11	CD68 IHC	583.86
X020	Aged	1	11	CD68 IHC	520.31
X020	Aged	1	11	CD68 IHC	434.8
X020	Aged	1	11	CD68 IHC	481.64
X020	Aged	1	11	CD68 IHC	947.33
X020	Aged	1	11	CD68 IHC	507.68
X020	Aged	1	13	SABgal	988.25
X020	Aged	1	13	SABgal	1029.23
X020	Aged	1	13	SABgal	379.3
X020	Aged	1	13	SABgal	1317.26
X020	Aged	1	13	SABgal	345.22
X020	Aged	1	13	SABgal	630.02
X020	Aged	1	13	SABgal	404.26
X020	Aged	1	13	SABgal	724.32
X020	Aged	1	13	SABgal	232.3
X020	Aged	1	13	SABgal	1533.93
X020	Aged	1	13	SABgal	1806.07
X020	Aged	1	13	SABgal	1315.81
X020	Aged	1	13	SABgal	897.21
X020	Aged	1	13	SABgal	611.42
X020	Aged	1	13	SABgal	740.34
X020	Aged	1	13	SABgal	900.03
X020	Aged	1	13	SABgal	648.97
X020	Aged	1	13	SABgal	774.76
X020	Aged	1	13	SABgal	579.4
X020	Aged	1	13	SABgal	497.29
X020	Aged	1	13	SABgal	1102.61
X020	Aged	1	13	SABgal	1115.05
X020	Aged	1	13	SABgal	634.62
X020	Aged	1	13	SABgal	382.81
X020	Aged	1	13	SABgal	1347.52
X020	Aged	1	13	SABgal	467.13
X020	Aged	1	13	SABgal	732.67
X020	Aged	1	13	SABgal	1130.19
X020	Aged	1	13	SABgal	433.73
X020	Aged	1	13	SABgal	1572.96
X020	Aged	1	13	SABgal	276.54
X020	Aged	1	13	SABgal	209.17
X020	Aged	1	13	SABgal	379.3
X020	Aged	1	13	SABgal	836.37
X020	Aged	1	13	SABgal	387.06
X020	Aged	1	13	SABgal	300.45
X020	Aged	1	13	SABgal	1115.56
X020	Aged	1	13	SABgal	864.12
X020	Aged	1	13	SABgal	1341.03
X020	Aged	1	13	SABgal	244.02
X020	Aged	1	13	SABgal	162.24
X020	Aged	1	10	Trichrome	623.16
X020	Aged	1	10	Trichrome	635.79
X020	Aged	1	10	Trichrome	636.26
X020	Aged	1	10	Trichrome	515.16
X020	Aged	1	10	Trichrome	396.77
X020	Aged	1	10	Trichrome	125.4
X020	Aged	1	10	Trichrome	235.97
X020	Aged	1	10	Trichrome	267.55
X020	Aged	1	10	Trichrome	412.08
X020	Aged	1	10	Trichrome	675.24
X020	Aged	1	10	Trichrome	331.4
X020	Aged	1	10	Trichrome	895.3
X020	Aged	1	10	Trichrome	949.71
X020	Aged	1	10	Trichrome	568.6
X020	Aged	1	10	Trichrome	287.49
X020	Aged	1	10	Trichrome	764.75
X020	Aged	1	10	Trichrome	448.22
X020	Aged	1	10	Trichrome	636.56
X020	Aged	1	10	Trichrome	304
X020	Aged	1	10	Trichrome	585.41
X020	Aged	1	10	Trichrome	397.88
X020	Aged	1	10	Trichrome	641.81
X020	Aged	1	10	Trichrome	332.5
X020	Aged	1	10	Trichrome	704.6
X020	Aged	1	10	Trichrome	1280.46
X020	Aged	1	10	Trichrome	2013.22
X020	Aged	1	10	Trichrome	582.31
X020	Aged	1	10	Trichrome	459.86
X020	Aged	1	10	Trichrome	463.67
X020	Aged	1	10	Trichrome	391.28
5001	Young	1	33	aSMA IHC	382.24
5001	Young	1	33	aSMA IHC	775.57
5001	Young	1	33	aSMA IHC	250.85
5001	Young	1	33	aSMA IHC	1031.12
5001	Young	1	33	aSMA IHC	474.21
5001	Young	1	33	aSMA IHC	244.18
5001	Young	1	33	aSMA IHC	499.94
5001	Young	1	33	aSMA IHC	361.27
5001	Young	1	33	aSMA IHC	801.7
5001	Young	1	33	aSMA IHC	661.37
5001	Young	1	33	aSMA IHC	522.73
5001	Young	1	33	aSMA IHC	304.28
5001	Young	1	33	aSMA IHC	770.9
5001	Young	1	33	aSMA IHC	729.29
5001	Young	1	33	aSMA IHC	939.86
5001	Young	1	33	aSMA IHC	516.63
5001	Young	1	33	aSMA IHC	730.72
5001	Young	1	33	aSMA IHC	513.49
5001	Young	1	33	aSMA IHC	280.64
5001	Young	1	33	aSMA IHC	1057.89
5001	Young	1	33	aSMA IHC	447.25
5001	Young	1	33	aSMA IHC	768.8
5001	Young	1	33	aSMA IHC	418.69
5001	Young	1	33	aSMA IHC	456.79
5001	Young	1	33	aSMA IHC	142.5
5001	Young	1	33	aSMA IHC	78.95
5001	Young	1	33	aSMA IHC	653.77
5001	Young	1	26	CD68 IHC	430.73
5001	Young	1	26	CD68 IHC	224.49
5001	Young	1	26	CD68 IHC	478.31
5001	Young	1	26	CD68 IHC	845.8
5001	Young	1	26	CD68 IHC	730.98
5001	Young	1	26	CD68 IHC	1086.35
5001	Young	1	26	CD68 IHC	663.06
5001	Young	1	26	CD68 IHC	626.88
5001	Young	1	26	CD68 IHC	107.97
5001	Young	1	26	CD68 IHC	548.02
5001	Young	1	26	CD68 IHC	149.04
5001	Young	1	26	CD68 IHC	395.18
5001	Young	1	26	CD68 IHC	657.97
5001	Young	1	26	CD68 IHC	592.64
5001	Young	1	26	CD68 IHC	302.87
5001	Young	1	26	CD68 IHC	576.06
5001	Young	1	26	CD68 IHC	873.34
5001	Young	1	26	CD68 IHC	739.75
5001	Young	1	26	CD68 IHC	949.15
5001	Young	1	26	CD68 IHC	270.99
5001	Young	1	36	SABgal	487.48
5001	Young	1	36	SABgal	166.13
5001	Young	1	36	SABgal	441.52
5001	Young	1	36	SABgal	754.64
5001	Young	1	36	SABgal	169.73
5001	Young	1	36	SABgal	741.03
5001	Young	1	36	SABgal	322.67
5001	Young	1	36	SABgal	450.91
5001	Young	1	36	SABgal	305.98
5001	Young	1	36	SABgal	227.11
5001	Young	1	36	SABgal	564.87
5001	Young	1	36	SABgal	676.29
5001	Young	1	36	SABgal	907.62
5001	Young	1	36	SABgal	814.46
5001	Young	1	36	SABgal	691.86
5001	Young	1	36	SABgal	801.09
5001	Young	1	36	SABgal	717.78
5001	Young	1	36	SABgal	285.96
5001	Young	1	36	SABgal	1077.59
5001	Young	1	36	SABgal	244.91
5001	Young	1	36	SABgal	716.31
5001	Young	1	36	SABgal	135.06
5001	Young	1	36	SABgal	542.56
5001	Young	1	36	SABgal	635.79
5001	Young	1	36	SABgal	661.85
5001	Young	1	36	SABgal	306.26
5001	Young	1	30	Trichrome	253.77
5001	Young	1	30	Trichrome	284.46
5001	Young	1	30	Trichrome	310.27
5001	Young	1	30	Trichrome	616.52
5001	Young	1	30	Trichrome	620.3
5001	Young	1	30	Trichrome	696.66
5001	Young	1	30	Trichrome	734.77
5001	Young	1	30	Trichrome	755.92
5001	Young	1	30	Trichrome	868.8
5001	Young	1	30	Trichrome	921.57
5001	Young	1	30	Trichrome	989.3
5001	Young	1	30	Trichrome	1001.56
5001	Young	1	30	Trichrome	1014.47
5001	Young	1	30	Trichrome	1022.88
5001	Young	1	30	Trichrome	1177.55
D212	Young	1	13	aSMA IHC	270.12
D212	Young	1	13	aSMA IHC	210.73
D212	Young	1	13	aSMA IHC	471.66
D212	Young	1	13	aSMA IHC	209.53
D212	Young	1	13	aSMA IHC	295.43
D212	Young	1	13	aSMA IHC	603.44
D212	Young	1	13	aSMA IHC	1038.11
D212	Young	1	13	aSMA IHC	683.72
D212	Young	1	13	aSMA IHC	1316.64
D212	Young	1	13	aSMA IHC	837.96
D212	Young	1	13	aSMA IHC	385.42
D212	Young	1	13	aSMA IHC	308.31
D212	Young	1	13	aSMA IHC	415.63
D212	Young	1	13	aSMA IHC	916.89
D212	Young	1	13	aSMA IHC	408.27
D212	Young	1	13	aSMA IHC	266.04
D212	Young	1	13	aSMA IHC	192.97
D212	Young	1	13	aSMA IHC	135.06
D212	Young	1	13	aSMA IHC	245.17
D212	Young	1	13	aSMA IHC	570.55
D212	Young	1	13	aSMA IHC	1129.15
D212	Young	1	13	aSMA IHC	611.15
D212	Young	1	13	aSMA IHC	494.04
D212	Young	1	13	aSMA IHC	664.41
D212	Young	1	13	aSMA IHC	585.33
D212	Young	1	13	aSMA IHC	256.01
D212	Young	1	13	aSMA IHC	347.88
D212	Young	1	13	aSMA IHC	314.85
D212	Young	1	13	aSMA IHC	809.12
D212	Young	1	13	aSMA IHC	669.29
D212	Young	1	13	aSMA IHC	212.05
D212	Young	1	13	aSMA IHC	183.69
D212	Young	1	13	aSMA IHC	535.78
D212	Young	1	13	aSMA IHC	1408.3
D212	Young	1	13	aSMA IHC	784.9
D212	Young	1	13	aSMA IHC	654.72
D212	Young	1	13	aSMA IHC	818.95
D212	Young	1	13	aSMA IHC	625.75
D212	Young	1	13	aSMA IHC	402.91
D212	Young	1	13	aSMA IHC	290.43
D212	Young	1	13	aSMA IHC	248.54
D212	Young	1	13	aSMA IHC	349.89
D212	Young	1	13	aSMA IHC	1043.25
D212	Young	1	13	aSMA IHC	641.35
D212	Young	1	13	aSMA IHC	811.67
D212	Young	1	13	aSMA IHC	633.26
D212	Young	1	13	aSMA IHC	256.1
D212	Young	1	14	CD68 IHC	355.82
D212	Young	1	14	CD68 IHC	159.65
D212	Young	1	14	CD68 IHC	251.9
D212	Young	1	14	CD68 IHC	503.33
D212	Young	1	14	CD68 IHC	458.46
D212	Young	1	14	CD68 IHC	456.04
D212	Young	1	14	CD68 IHC	683.72
D212	Young	1	14	CD68 IHC	541.29
D212	Young	1	14	CD68 IHC	581.73
D212	Young	1	14	CD68 IHC	496.69
D212	Young	1	14	CD68 IHC	338.46
D212	Young	1	14	CD68 IHC	283.75
D212	Young	1	14	CD68 IHC	172.6
D212	Young	1	14	CD68 IHC	150.56
D212	Young	1	14	CD68 IHC	241.6
D212	Young	1	14	CD68 IHC	438.78
D212	Young	1	14	CD68 IHC	326.62
D212	Young	1	14	CD68 IHC	548.01
D212	Young	1	14	CD68 IHC	473.34
D212	Young	1	14	CD68 IHC	240.4
D212	Young	1	14	CD68 IHC	458.66
D212	Young	1	14	CD68 IHC	1083.92
D212	Young	1	14	CD68 IHC	554.78
D212	Young	1	14	CD68 IHC	296.79
D212	Young	1	14	CD68 IHC	193.82
D212	Young	1	14	CD68 IHC	289.8
D212	Young	1	14	CD68 IHC	260.16
D212	Young	1	14	CD68 IHC	577.89
D212	Young	1	14	CD68 IHC	277.38
D212	Young	1	14	CD68 IHC	373.69
D212	Young	1	14	CD68 IHC	198.36
D212	Young	1	14	CD68 IHC	198.36
D212	Young	1	14	CD68 IHC	199.82
D212	Young	1	14	CD68 IHC	502.55
D212	Young	1	14	CD68 IHC	342.22
D212	Young	1	14	CD68 IHC	224.52
D212	Young	1	14	CD68 IHC	314.9
D212	Young	1	14	CD68 IHC	220.86
D212	Young	1	14	CD68 IHC	577.25
D212	Young	1	14	CD68 IHC	437.25
D212	Young	1	14	CD68 IHC	673.82
D212	Young	1	14	CD68 IHC	573.4
D212	Young	1	14	CD68 IHC	1021.46
D212	Young	1	14	CD68 IHC	412.27
D212	Young	1	14	CD68 IHC	468.72
D212	Young	1	14	CD68 IHC	361.2
D212	Young	1	14	CD68 IHC	248.29
D212	Young	1	14	CD68 IHC	1575.48
D212	Young	1	14	CD68 IHC	483.06
D212	Young	1	14	CD68 IHC	494.69
D212	Young	1	14	CD68 IHC	309.95
D212	Young	1	14	CD68 IHC	153.08
D212	Young	1	15	SABgal	550.55
D212	Young	1	15	SABgal	600.57
D212	Young	1	15	SABgal	543.92
D212	Young	1	15	SABgal	1284.27
D212	Young	1	15	SABgal	274.98
D212	Young	1	15	SABgal	407.87
D212	Young	1	15	SABgal	414.31
D212	Young	1	15	SABgal	470.31
D212	Young	1	15	SABgal	342.18
D212	Young	1	15	SABgal	93.8
D212	Young	1	15	SABgal	1122.36
D212	Young	1	15	SABgal	1135.06
D212	Young	1	15	SABgal	684.18
D212	Young	1	15	SABgal	641.28
D212	Young	1	15	SABgal	1326.18
D212	Young	1	15	SABgal	1943.83
D212	Young	1	15	SABgal	815.84
D212	Young	1	15	SABgal	397
D212	Young	1	15	SABgal	662.51
D212	Young	1	15	SABgal	464.96
D212	Young	1	15	SABgal	447.55
D212	Young	1	15	SABgal	277.36
D212	Young	1	15	SABgal	468.12
D212	Young	1	15	SABgal	517.69
D212	Young	1	15	SABgal	171.34
D212	Young	1	15	SABgal	328.85
D212	Young	1	15	SABgal	470.56
D212	Young	1	15	SABgal	554.88
D212	Young	1	15	SABgal	483.21
D212	Young	1	15	SABgal	561.54
D212	Young	1	15	SABgal	742.49
D212	Young	1	15	SABgal	214.04
D212	Young	1	15	SABgal	142.71
D212	Young	1	15	SABgal	290.02
D212	Young	1	15	SABgal	379.43
D212	Young	1	15	SABgal	402.67
D212	Young	1	15	SABgal	459.63
D212	Young	1	15	SABgal	755.97
D212	Young	1	15	SABgal	808.03
D212	Young	1	15	SABgal	889.03
D212	Young	1	15	SABgal	554.84
D212	Young	1	15	SABgal	412.88
D216	Young	1	30	aSMA IHC	598.6
D216	Young	1	30	aSMA IHC	384.74
D216	Young	1	30	aSMA IHC	267.7
D216	Young	1	30	aSMA IHC	213.79
D216	Young	1	30	aSMA IHC	200.74
D216	Young	1	30	aSMA IHC	207.62
D216	Young	1	30	aSMA IHC	144.8
D216	Young	1	30	aSMA IHC	481.33
D216	Young	1	30	aSMA IHC	165.48
D216	Young	1	32	CD68 IHC	266.37
D216	Young	1	32	CD68 IHC	861.17
D216	Young	1	32	CD68 IHC	320.08
D216	Young	1	32	CD68 IHC	298.67
D216	Young	1	32	CD68 IHC	679.02
D216	Young	1	32	CD68 IHC	1428.69
D216	Young	1	32	CD68 IHC	362.73
D216	Young	1	32	CD68 IHC	256.36
D216	Young	1	32	CD68 IHC	180.72
D216	Young	1	32	CD68 IHC	207.78
D216	Young	1	24	SABgal	660.88
D216	Young	1	24	SABgal	533.44
D216	Young	1	24	SABgal	162.96
D216	Young	1	24	SABgal	133.47
D216	Young	1	24	SABgal	133.47
D216	Young	1	24	SABgal	405.1
D216	Young	1	24	SABgal	344.03
D216	Young	1	24	SABgal	145.6
X103	Young	1	11	CD68 IHC	322.43
X103	Young	1	11	CD68 IHC	586.1
X103	Young	1	11	CD68 IHC	505.62
X103	Young	1	11	CD68 IHC	953.96
X103	Young	1	11	CD68 IHC	731.25
X103	Young	1	11	CD68 IHC	397.28
X103	Young	1	11	CD68 IHC	517.45
X103	Young	1	11	CD68 IHC	1003.21
X103	Young	1	11	CD68 IHC	376.23
X103	Young	1	11	CD68 IHC	964.85
X103	Young	1	11	CD68 IHC	339.5
X103	Young	1	11	CD68 IHC	491.52
X103	Young	1	11	CD68 IHC	854.22
X103	Young	1	11	CD68 IHC	355.53
X103	Young	1	11	CD68 IHC	451.08
X103	Young	1	11	CD68 IHC	806.19
X103	Young	1	13	SABgal	445.62
X103	Young	1	13	SABgal	338.22
X103	Young	1	13	SABgal	262.73
X103	Young	1	13	SABgal	812.72
X103	Young	1	13	SABgal	516.21
X103	Young	1	13	SABgal	379.68
X103	Young	1	13	SABgal	316.36
X103	Young	1	13	SABgal	1257.58
X103	Young	1	13	SABgal	458
X103	Young	1	13	SABgal	583.03
X103	Young	1	13	SABgal	375.95
X103	Young	1	13	SABgal	223.08
X103	Young	1	13	SABgal	304.99
X103	Young	1	13	SABgal	336.58
X103	Young	1	13	SABgal	250.29
X103	Young	1	13	SABgal	236.72
X103	Young	1	13	SABgal	499.89
X103	Young	1	13	SABgal	441.51
X103	Young	1	13	SABgal	299.57
X103	Young	1	13	SABgal	210.3
X103	Young	1	13	SABgal	152.25
X103	Young	1	15	Trichrome	202.15
X103	Young	1	15	Trichrome	206.15
X103	Young	1	15	Trichrome	754.44
X103	Young	1	15	Trichrome	206.58
X103	Young	1	15	Trichrome	326.92
X103	Young	1	15	Trichrome	577.3
X103	Young	1	15	Trichrome	894.64
X103	Young	1	15	Trichrome	594.55
X103	Young	1	15	Trichrome	213.4
X103	Young	1	15	Trichrome	215.75
X103	Young	1	15	Trichrome	282.9
X103	Young	1	15	Trichrome	336.33
X103	Young	1	15	Trichrome	261.02
X103	Young	1	15	Trichrome	255.82
X103	Young	1	15	Trichrome	249.64
X103	Young	1	15	Trichrome	944.62
X103	Young	1	15	Trichrome	379.66
X103	Young	1	15	Trichrome	367.03
X103	Young	1	15	Trichrome	206.81
X103	Young	1	15	Trichrome	290.28
X103	Young	1	15	Trichrome	1302.28
X103	Young	1	15	Trichrome	601.19
X103	Young	1	15	Trichrome	394.26
X103	Young	1	15	Trichrome	356.24
X103	Young	1	15	Trichrome	715.34
X103	Young	1	15	Trichrome	1301.12
X103	Young	1	15	Trichrome	239.77
X103	Young	1	15	Trichrome	175.2
X103	Young	1	15	Trichrome	293.04
X103	Young	1	15	Trichrome	226.61
F184	Aged	2	21	aSMA IHC	793.11
F184	Aged	2	21	aSMA IHC	231.39
F184	Aged	2	21	aSMA IHC	867.22
F184	Aged	2	21	aSMA IHC	462.9
F184	Aged	2	21	aSMA IHC	469.42
F184	Aged	2	21	aSMA IHC	205.54
F184	Aged	2	21	aSMA IHC	966.94
F184	Aged	2	21	aSMA IHC	918.55
F184	Aged	2	21	aSMA IHC	1454.4
F184	Aged	2	21	aSMA IHC	1320.34
F184	Aged	2	21	aSMA IHC	876.19
F184	Aged	2	21	aSMA IHC	1190.95
F184	Aged	2	22	CD68 IHC	840.09
F184	Aged	2	22	CD68 IHC	358.88
F184	Aged	2	22	CD68 IHC	528.25
F184	Aged	2	22	CD68 IHC	823.41
F184	Aged	2	22	CD68 IHC	681.77
F184	Aged	2	22	CD68 IHC	533.16
F184	Aged	2	22	CD68 IHC	722.03
F184	Aged	2	22	CD68 IHC	207.54
F184	Aged	2	22	CD68 IHC	978.93
F184	Aged	2	22	CD68 IHC	559.94
F184	Aged	2	22	CD68 IHC	455.54
F184	Aged	2	22	CD68 IHC	219.29
F184	Aged	2	22	CD68 IHC	432.43
F184	Aged	2	22	CD68 IHC	1342.86
F184	Aged	2	22	CD68 IHC	394.98
F184	Aged	2	22	CD68 IHC	262.54
F184	Aged	2	22	CD68 IHC	357.15
F184	Aged	2	22	CD68 IHC	343.44
F184	Aged	2	22	CD68 IHC	491.27
F184	Aged	2	22	CD68 IHC	592.56
F184	Aged	2	35	SABgal	451.61
F184	Aged	2	35	SABgal	556.71
F184	Aged	2	35	SABgal	343.66
F184	Aged	2	35	SABgal	569.71
F184	Aged	2	35	SABgal	971.96
F184	Aged	2	35	SABgal	628.08
F184	Aged	2	35	SABgal	493.44
F184	Aged	2	35	SABgal	307.47
F184	Aged	2	35	SABgal	309.77
F184	Aged	2	35	SABgal	208.39
F184	Aged	2	35	SABgal	270.33
F184	Aged	2	35	SABgal	317
F184	Aged	2	35	SABgal	561.5
F184	Aged	2	35	SABgal	315.33
F184	Aged	2	35	SABgal	158.5
F184	Aged	2	35	SABgal	1116.05
F184	Aged	2	35	SABgal	299.48
F184	Aged	2	35	SABgal	350
F184	Aged	2	35	SABgal	381.94
F184	Aged	2	35	SABgal	229.7
F184	Aged	2	35	SABgal	818.76
F184	Aged	2	38	Trichrome	332.16
F184	Aged	2	38	Trichrome	210.97
F184	Aged	2	38	Trichrome	1217.24
F184	Aged	2	38	Trichrome	195.69
F184	Aged	2	38	Trichrome	584.01
F184	Aged	2	38	Trichrome	423.25
F184	Aged	2	38	Trichrome	155.58
F184	Aged	2	38	Trichrome	288.06
F184	Aged	2	38	Trichrome	313.57
F184	Aged	2	38	Trichrome	233.98
F184	Aged	2	38	Trichrome	598.25
F184	Aged	2	38	Trichrome	845.58
F184	Aged	2	38	Trichrome	267.92
F184	Aged	2	38	Trichrome	968.35
F184	Aged	2	38	Trichrome	511.66
F184	Aged	2	38	Trichrome	1149.18
F184	Aged	2	38	Trichrome	445.12
F184	Aged	2	38	Trichrome	638.01
F184	Aged	2	38	Trichrome	222.67
F184	Aged	2	38	Trichrome	125.66
F184	Aged	2	38	Trichrome	421.6
F184	Aged	2	38	Trichrome	737.39
F184	Aged	2	38	Trichrome	285.86
F184	Aged	2	38	Trichrome	270.45
F184	Aged	2	38	Trichrome	702.34
F184	Aged	2	38	Trichrome	938.17
F184	Aged	2	38	Trichrome	724.33
F184	Aged	2	38	Trichrome	611.94
F184	Aged	2	38	Trichrome	232.02
F184	Aged	2	38	Trichrome	220.41
F184	Aged	2	38	Trichrome	482.97
F184	Aged	2	38	Trichrome	518.84
F184	Aged	2	38	Trichrome	464.2
F184	Aged	2	38	Trichrome	222
F322	Aged	2	24	aSMA IHC	915.61
F322	Aged	2	24	aSMA IHC	1588.23
F322	Aged	2	24	aSMA IHC	455.46
F322	Aged	2	24	aSMA IHC	454.8
F322	Aged	2	24	aSMA IHC	585.5
F322	Aged	2	24	aSMA IHC	688.5
F322	Aged	2	24	aSMA IHC	3440.63
F322	Aged	2	24	aSMA IHC	645.33
F322	Aged	2	24	aSMA IHC	332.5
F322	Aged	2	24	aSMA IHC	483.21
F322	Aged	2	24	aSMA IHC	1933.11
F322	Aged	2	24	aSMA IHC	1790.9
F322	Aged	2	24	aSMA IHC	1369.45
F322	Aged	2	24	aSMA IHC	513.62
F322	Aged	2	24	aSMA IHC	698.44
F322	Aged	2	24	aSMA IHC	625.28
F322	Aged	2	24	aSMA IHC	179.88
F322	Aged	2	24	aSMA IHC	319.68
F322	Aged	2	24	aSMA IHC	554.02
F322	Aged	2	24	aSMA IHC	650.23
F322	Aged	2	24	aSMA IHC	790.27
F322	Aged	2	26	CD68 IHC	614.68
F322	Aged	2	26	CD68 IHC	178.87
F322	Aged	2	26	CD68 IHC	447.5
F322	Aged	2	26	CD68 IHC	146.24
F322	Aged	2	26	CD68 IHC	303.99
F322	Aged	2	26	CD68 IHC	419.27
F322	Aged	2	26	CD68 IHC	219.41
F322	Aged	2	26	CD68 IHC	1195.05
F322	Aged	2	26	CD68 IHC	355.24
F322	Aged	2	26	CD68 IHC	1552.12
F322	Aged	2	26	CD68 IHC	2190.24
F322	Aged	2	26	CD68 IHC	218.93
F322	Aged	2	26	CD68 IHC	575.35
F322	Aged	2	26	CD68 IHC	624.22
F322	Aged	2	26	CD68 IHC	382.91
F322	Aged	2	26	CD68 IHC	242.9
F322	Aged	2	26	CD68 IHC	141.47
F322	Aged	2	26	CD68 IHC	82.1
F322	Aged	2	26	CD68 IHC	248.23
F322	Aged	2	26	CD68 IHC	1405.48
F322	Aged	2	26	CD68 IHC	635.32
F322	Aged	2	26	CD68 IHC	674.36
F322	Aged	2	26	CD68 IHC	930.28
F322	Aged	2	26	CD68 IHC	349.09
F322	Aged	2	26	CD68 IHC	1310.67
F322	Aged	2	26	CD68 IHC	1200.87
F322	Aged	2	26	CD68 IHC	264.54
F322	Aged	2	26	CD68 IHC	1394.76
F322	Aged	2	26	CD68 IHC	687.13
F322	Aged	2	26	CD68 IHC	694.72
F322	Aged	2	26	CD68 IHC	181.64
F322	Aged	2	26	CD68 IHC	252.96
F322	Aged	2	26	CD68 IHC	1731.87
F322	Aged	2	25	SABgal	754.66
F322	Aged	2	25	SABgal	400.14
F322	Aged	2	25	SABgal	408.14
F322	Aged	2	25	SABgal	533.41
F322	Aged	2	25	SABgal	374.06
F322	Aged	2	25	SABgal	288.57
F322	Aged	2	25	SABgal	387.12
F322	Aged	2	25	SABgal	1196.71
F322	Aged	2	25	SABgal	322.4
F322	Aged	2	25	SABgal	537.1
F322	Aged	2	25	SABgal	292.14
F322	Aged	2	25	SABgal	1862.81
F322	Aged	2	25	SABgal	1583.84
F322	Aged	2	25	SABgal	3020.27
F322	Aged	2	13	Trichrome	513.94
F322	Aged	2	13	Trichrome	510.99
F322	Aged	2	13	Trichrome	838.45
F322	Aged	2	13	Trichrome	505.82
F322	Aged	2	13	Trichrome	402.91
F322	Aged	2	13	Trichrome	833.62
F322	Aged	2	13	Trichrome	738.97
F322	Aged	2	13	Trichrome	343.15
F322	Aged	2	13	Trichrome	606.6
F322	Aged	2	13	Trichrome	616.83
F322	Aged	2	13	Trichrome	171.21
F322	Aged	2	13	Trichrome	489.44
F322	Aged	2	13	Trichrome	312.81
F322	Aged	2	13	Trichrome	311.48
F322	Aged	2	13	Trichrome	119.23
F322	Aged	2	13	Trichrome	225.94
F322	Aged	2	13	Trichrome	545.98
F322	Aged	2	13	Trichrome	206.39
F322	Aged	2	13	Trichrome	125.7
F322	Aged	2	13	Trichrome	619.98
F322	Aged	2	13	Trichrome	263.18
F322	Aged	2	13	Trichrome	186.2
F322	Aged	2	13	Trichrome	208.09
F322	Aged	2	13	Trichrome	586.53
F322	Aged	2	13	Trichrome	480.54
F322	Aged	2	13	Trichrome	454.5
F322	Aged	2	13	Trichrome	316.68
F322	Aged	2	13	Trichrome	557.88
F322	Aged	2	13	Trichrome	986.78
F322	Aged	2	13	Trichrome	366.72
F322	Aged	2	13	Trichrome	370
F322	Aged	2	13	Trichrome	401.69
F322	Aged	2	13	Trichrome	563.87
F322	Aged	2	13	Trichrome	839.29
F322	Aged	2	13	Trichrome	793.64
F322	Aged	2	13	Trichrome	534.06
F322	Aged	2	13	Trichrome	238.3
F322	Aged	2	13	Trichrome	396.55
F322	Aged	2	13	Trichrome	565.56
F322	Aged	2	13	Trichrome	449.21
F322	Aged	2	13	Trichrome	396.39
F322	Aged	2	13	Trichrome	258.9
F322	Aged	2	13	Trichrome	514.31
F322	Aged	2	13	Trichrome	968.92
F322	Aged	2	13	Trichrome	417.53
F322	Aged	2	13	Trichrome	251
F949	Aged	2	12	aSMA IHC	557.92
F949	Aged	2	12	aSMA IHC	507.84
F949	Aged	2	12	aSMA IHC	688.5
F949	Aged	2	12	aSMA IHC	1138.16
F949	Aged	2	12	aSMA IHC	525.68
F949	Aged	2	12	aSMA IHC	179.82
F949	Aged	2	12	aSMA IHC	506.73
F949	Aged	2	12	aSMA IHC	961.87
F949	Aged	2	12	aSMA IHC	577.45
F949	Aged	2	12	aSMA IHC	659.85
F949	Aged	2	12	aSMA IHC	432.77
F949	Aged	2	12	aSMA IHC	161.76
F949	Aged	2	12	aSMA IHC	222.12
F949	Aged	2	12	aSMA IHC	236.13
F949	Aged	2	11	CD68 IHC	484.14
F949	Aged	2	11	CD68 IHC	223.7
F949	Aged	2	11	CD68 IHC	389.35
F949	Aged	2	11	CD68 IHC	531.44
F949	Aged	2	11	CD68 IHC	297.94
F949	Aged	2	11	CD68 IHC	542.86
F949	Aged	2	11	CD68 IHC	708.25
F949	Aged	2	11	CD68 IHC	345.52
F949	Aged	2	11	CD68 IHC	259.14
F949	Aged	2	11	CD68 IHC	113.72
F949	Aged	2	11	CD68 IHC	415
F949	Aged	2	11	CD68 IHC	615.17
F949	Aged	2	11	CD68 IHC	750.22
F949	Aged	2	11	CD68 IHC	398.83
F949	Aged	2	11	CD68 IHC	450.55
F949	Aged	2	11	CD68 IHC	226.22
F949	Aged	2	11	CD68 IHC	1091.43
F949	Aged	2	11	CD68 IHC	717.36
F949	Aged	2	11	CD68 IHC	1104.49
F949	Aged	2	11	CD68 IHC	501.6
F949	Aged	2	11	CD68 IHC	1210.35
F949	Aged	2	11	CD68 IHC	177.48
F949	Aged	2	11	CD68 IHC	366.58
F949	Aged	2	15	SABgal	424.01
F949	Aged	2	15	SABgal	1353.77
F949	Aged	2	15	SABgal	1762.45
F949	Aged	2	15	SABgal	748.29
F949	Aged	2	15	SABgal	254.16
F949	Aged	2	15	SABgal	896.2
F949	Aged	2	15	SABgal	357.36
F949	Aged	2	15	SABgal	490.45
F949	Aged	2	15	SABgal	279.58
F949	Aged	2	15	SABgal	186.24
F949	Aged	2	15	SABgal	313.4
F949	Aged	2	15	SABgal	213.15
F949	Aged	2	15	SABgal	678.36
F949	Aged	2	15	SABgal	275.36
F949	Aged	2	15	SABgal	713.54
F949	Aged	2	15	SABgal	382.49
F949	Aged	2	15	SABgal	282.5
F949	Aged	2	15	SABgal	202.5
F949	Aged	2	9	Trichrome	833.09
F949	Aged	2	9	Trichrome	547.3
F949	Aged	2	9	Trichrome	235.06
F949	Aged	2	9	Trichrome	404.84
F949	Aged	2	9	Trichrome	347.99
F949	Aged	2	9	Trichrome	167.04
F949	Aged	2	9	Trichrome	308.76
F949	Aged	2	9	Trichrome	480.54
F949	Aged	2	9	Trichrome	366.2
F949	Aged	2	9	Trichrome	346.69
F949	Aged	2	9	Trichrome	1086.81
F949	Aged	2	9	Trichrome	809.13
F949	Aged	2	9	Trichrome	174.12
F949	Aged	2	9	Trichrome	989.42
F949	Aged	2	9	Trichrome	551.87
F949	Aged	2	9	Trichrome	554.15
F949	Aged	2	9	Trichrome	277.47
F949	Aged	2	9	Trichrome	245.17
F949	Aged	2	9	Trichrome	449.9
F949	Aged	2	9	Trichrome	553.35
F949	Aged	2	9	Trichrome	458.68
F949	Aged	2	9	Trichrome	513.72
F949	Aged	2	9	Trichrome	420.42
H962	Aged	2	24	aSMA IHC	777.14
H962	Aged	2	24	aSMA IHC	368.22
H962	Aged	2	24	aSMA IHC	2265.73
H962	Aged	2	24	aSMA IHC	208.81
H962	Aged	2	24	aSMA IHC	584.96
H962	Aged	2	24	aSMA IHC	210.91
H962	Aged	2	24	aSMA IHC	1131.53
H962	Aged	2	24	aSMA IHC	1103.08
H962	Aged	2	24	aSMA IHC	750.21
H962	Aged	2	24	aSMA IHC	333.06
H962	Aged	2	24	aSMA IHC	273.82
H962	Aged	2	24	aSMA IHC	281.3
H962	Aged	2	24	aSMA IHC	1320.36
H962	Aged	2	24	aSMA IHC	149.64
H962	Aged	2	24	aSMA IHC	225.44
H962	Aged	2	24	aSMA IHC	341.57
H962	Aged	2	25	CD68 IHC	692.28
H962	Aged	2	25	CD68 IHC	359.2
H962	Aged	2	25	CD68 IHC	936.39
H962	Aged	2	25	CD68 IHC	571.14
H962	Aged	2	25	CD68 IHC	532.97
H962	Aged	2	25	CD68 IHC	726.9
H962	Aged	2	25	CD68 IHC	317.75
H962	Aged	2	25	CD68 IHC	997.82
H962	Aged	2	25	CD68 IHC	576.75
H962	Aged	2	25	CD68 IHC	715.6
H962	Aged	2	25	CD68 IHC	256.26
H962	Aged	2	25	CD68 IHC	965.29
H962	Aged	2	25	CD68 IHC	337.42
H962	Aged	2	25	CD68 IHC	276.02
H962	Aged	2	25	CD68 IHC	314.85
H962	Aged	2	25	CD68 IHC	306.35
H962	Aged	2	25	CD68 IHC	117.53
H962	Aged	2	25	CD68 IHC	518.98
H962	Aged	2	25	CD68 IHC	188.28
H962	Aged	2	25	CD68 IHC	271.88
H962	Aged	2	25	CD68 IHC	683.74
H962	Aged	2	23	SABgal	613.23
H962	Aged	2	23	SABgal	148.22
H962	Aged	2	23	SABgal	109.12
H962	Aged	2	23	SABgal	197.43
H962	Aged	2	23	SABgal	311.74
H962	Aged	2	23	SABgal	494.56
H962	Aged	2	23	SABgal	313
H962	Aged	2	23	SABgal	222.63
H962	Aged	2	23	SABgal	710
H962	Aged	2	23	SABgal	660.53
H962	Aged	2	23	SABgal	494.85
H962	Aged	2	23	SABgal	151.97
H962	Aged	2	23	SABgal	741.41
H962	Aged	2	23	SABgal	178.03
H962	Aged	2	23	SABgal	267.62
H962	Aged	2	23	SABgal	131.09
H962	Aged	2	23	SABgal	374.55
H962	Aged	2	23	SABgal	569.09
H962	Aged	2	23	SABgal	174.79
H962	Aged	2	23	SABgal	132.62
H962	Aged	2	27	Trichrome	701.83
H962	Aged	2	27	Trichrome	249.04
H962	Aged	2	27	Trichrome	137
H962	Aged	2	27	Trichrome	327.12
H962	Aged	2	27	Trichrome	338.16
H962	Aged	2	27	Trichrome	168.24
H962	Aged	2	27	Trichrome	588.07
H962	Aged	2	27	Trichrome	242.12
H962	Aged	2	27	Trichrome	187.41
H962	Aged	2	27	Trichrome	492
H962	Aged	2	27	Trichrome	729.82
H962	Aged	2	27	Trichrome	466.68
H962	Aged	2	27	Trichrome	714.9
H962	Aged	2	27	Trichrome	138.01
H962	Aged	2	27	Trichrome	735.85
H962	Aged	2	27	Trichrome	409.13
H962	Aged	2	27	Trichrome	423.76
H962	Aged	2	27	Trichrome	271.28
H962	Aged	2	27	Trichrome	217.08
H962	Aged	2	27	Trichrome	227.11
H962	Aged	2	27	Trichrome	687.25
H962	Aged	2	27	Trichrome	226.33
H962	Aged	2	27	Trichrome	120.8
H962	Aged	2	27	Trichrome	224.6
H962	Aged	2	27	Trichrome	117.53
H962	Aged	2	27	Trichrome	281.08
H962	Aged	2	27	Trichrome	204.92
H962	Aged	2	27	Trichrome	193.03
H962	Aged	2	27	Trichrome	206.21
H962	Aged	2	27	Trichrome	311.15
H962	Aged	2	27	Trichrome	232.37
5043	Young	2	33	aSMA IHC	693.9
5043	Young	2	33	aSMA IHC	659.95
5043	Young	2	33	aSMA IHC	139.01
5043	Young	2	33	aSMA IHC	234.12
5043	Young	2	33	aSMA IHC	116.91
5043	Young	2	33	aSMA IHC	226.07
5043	Young	2	33	aSMA IHC	343.46
5043	Young	2	33	aSMA IHC	292.36
5043	Young	2	33	aSMA IHC	400.67
5043	Young	2	33	aSMA IHC	214.16
5043	Young	2	33	aSMA IHC	107.22
5043	Young	2	34	CD68 IHC	751.01
5043	Young	2	34	CD68 IHC	422.45
5043	Young	2	34	CD68 IHC	204.74
5043	Young	2	34	CD68 IHC	449.9
5043	Young	2	34	CD68 IHC	456.87
5043	Young	2	34	CD68 IHC	149.14
5043	Young	2	34	CD68 IHC	418.26
5043	Young	2	34	CD68 IHC	312.97
5043	Young	2	34	CD68 IHC	308.6
5043	Young	2	34	CD68 IHC	239.77
5043	Young	2	30	SABgal	728.56
5043	Young	2	30	SABgal	262.85
5043	Young	2	30	SABgal	340.87
5043	Young	2	30	SABgal	260.88
5043	Young	2	30	SABgal	215.75
5043	Young	2	30	SABgal	1171.58
5043	Young	2	32	Trichrome	433.53
5043	Young	2	32	Trichrome	183.79
5043	Young	2	32	Trichrome	303.92
5043	Young	2	32	Trichrome	114.45
5043	Young	2	32	Trichrome	236.13
5043	Young	2	32	Trichrome	92.09
5043	Young	2	32	Trichrome	162.17
5043	Young	2	32	Trichrome	693.06
5043	Young	2	32	Trichrome	454.07
5043	Young	2	32	Trichrome	192.56
5043	Young	2	32	Trichrome	471.79
5043	Young	2	32	Trichrome	274.89
5043	Young	2	32	Trichrome	358.25
5043	Young	2	32	Trichrome	265.76
D218	Young	2	10	aSMA IHC	606.6
D218	Young	2	10	aSMA IHC	667.15
D218	Young	2	10	aSMA IHC	251.9
D218	Young	2	10	aSMA IHC	190.67
D218	Young	2	10	aSMA IHC	850.55
D218	Young	2	10	aSMA IHC	695.76
D218	Young	2	10	aSMA IHC	225.78
D218	Young	2	10	aSMA IHC	402.91
D218	Young	2	10	aSMA IHC	200.64
D218	Young	2	10	aSMA IHC	149.14
D218	Young	2	10	aSMA IHC	559.32
D218	Young	2	10	aSMA IHC	296.24
D218	Young	2	10	aSMA IHC	1430.44
D218	Young	2	10	aSMA IHC	803.12
D218	Young	2	10	aSMA IHC	160.04
D218	Young	2	10	aSMA IHC	195.62
D218	Young	2	10	aSMA IHC	386.36
D218	Young	2	10	aSMA IHC	694.02
D218	Young	2	10	aSMA IHC	756.15
D218	Young	2	13	CD68 IHC	178.32
D218	Young	2	13	CD68 IHC	578.47
D218	Young	2	13	CD68 IHC	257.15
D218	Young	2	13	CD68 IHC	185.55
D218	Young	2	13	CD68 IHC	189.66
D218	Young	2	13	CD68 IHC	483.78
D218	Young	2	13	CD68 IHC	298.89
D218	Young	2	13	CD68 IHC	251.41
D218	Young	2	13	CD68 IHC	132.84
D218	Young	2	13	CD68 IHC	119.74
D218	Young	2	13	CD68 IHC	243.07
D218	Young	2	13	CD68 IHC	231.01
D218	Young	2	13	CD68 IHC	272.15
D218	Young	2	13	CD68 IHC	72.99
D218	Young	2	13	CD68 IHC	225.31
D218	Young	2	13	CD68 IHC	223.4
D218	Young	2	13	CD68 IHC	165.92
D218	Young	2	13	CD68 IHC	597.42
D218	Young	2	13	CD68 IHC	323.67
D218	Young	2	13	CD68 IHC	1947.22
D218	Young	2	13	CD68 IHC	1033.13
D218	Young	2	13	CD68 IHC	490.52
D218	Young	2	13	CD68 IHC	147.66
D218	Young	2	13	CD68 IHC	271.35
D218	Young	2	13	CD68 IHC	236.64
D218	Young	2	13	CD68 IHC	1196.44
D218	Young	2	13	CD68 IHC	129.5
D218	Young	2	13	CD68 IHC	235.17
D218	Young	2	13	CD68 IHC	339.22
D218	Young	2	13	CD68 IHC	295.73
D218	Young	2	13	CD68 IHC	377.57
D218	Young	2	13	CD68 IHC	211.93
D218	Young	2	13	CD68 IHC	789.28
D218	Young	2	13	CD68 IHC	909.01
D218	Young	2	15	SABgal	1299.62
D218	Young	2	15	SABgal	1228.54
D218	Young	2	15	SABgal	630.88
D218	Young	2	15	SABgal	583.33
D218	Young	2	15	SABgal	148.5
D218	Young	2	15	SABgal	304.67
D218	Young	2	15	SABgal	715.21
D218	Young	2	15	SABgal	1220.9
D218	Young	2	15	SABgal	200.87
D218	Young	2	15	SABgal	332.99
D218	Young	2	15	SABgal	601.71
D218	Young	2	15	SABgal	562.04
D218	Young	2	15	SABgal	204.69
D218	Young	2	15	SABgal	612.12
D218	Young	2	15	SABgal	583.9
D218	Young	2	15	SABgal	180.22
D218	Young	2	15	SABgal	167.36
D218	Young	2	15	SABgal	1347.13
D218	Young	2	15	SABgal	703.9
D218	Young	2	12	Trichrome	477.18
D218	Young	2	12	Trichrome	441.66
D218	Young	2	12	Trichrome	445.27
D218	Young	2	12	Trichrome	655.26
D218	Young	2	12	Trichrome	500.12
D218	Young	2	12	Trichrome	237.08
D218	Young	2	12	Trichrome	445.63
D218	Young	2	12	Trichrome	182.59
D218	Young	2	12	Trichrome	294.41
D218	Young	2	12	Trichrome	351.16
D218	Young	2	12	Trichrome	417.32
D218	Young	2	12	Trichrome	1353.92
D218	Young	2	12	Trichrome	698.65
D218	Young	2	12	Trichrome	199.7
D218	Young	2	12	Trichrome	296.62
D218	Young	2	12	Trichrome	571.91
D218	Young	2	12	Trichrome	899.56
D218	Young	2	12	Trichrome	148.21
D218	Young	2	12	Trichrome	617.97
D218	Young	2	12	Trichrome	116.67
X115	Young	2	3	SABgal	616.99
X115	Young	2	3	SABgal	1000.9
X115	Young	2	3	SABgal	644
X115	Young	2	3	SABgal	440.5
X115	Young	2	3	SABgal	742.32
X115	Young	2	3	SABgal	505.85
X115	Young	2	3	SABgal	487.48
X115	Young	2	3	SABgal	330.68
X115	Young	2	3	SABgal	287.45
X115	Young	2	3	SABgal	197.1
X115	Young	2	3	SABgal	561.52
X115	Young	2	3	SABgal	597.24
X115	Young	2	3	SABgal	181.83
X115	Young	2	3	SABgal	258.21
X115	Young	2	3	SABgal	412.41
X115	Young	2	3	SABgal	193.03
X115	Young	2	3	SABgal	264.71
X115	Young	2	3	SABgal	181.76
X115	Young	2	3	SABgal	209.53
X115	Young	2	3	SABgal	953.37
X115	Young	2	3	SABgal	235.11
X245	Young	2	23	aSMA IHC	818.22
X245	Young	2	23	aSMA IHC	765.57
X245	Young	2	23	aSMA IHC	509.2
X245	Young	2	23	aSMA IHC	294.13
X245	Young	2	23	aSMA IHC	282.37
X245	Young	2	23	aSMA IHC	877.98
X245	Young	2	23	aSMA IHC	479.61
X245	Young	2	23	aSMA IHC	815.46
X245	Young	2	23	aSMA IHC	231.11
X245	Young	2	23	aSMA IHC	256.93
X245	Young	2	23	aSMA IHC	446.29
X245	Young	2	23	aSMA IHC	545.07
X245	Young	2	23	aSMA IHC	450.3
X245	Young	2	23	aSMA IHC	546.94
X245	Young	2	23	aSMA IHC	725.11
X245	Young	2	23	aSMA IHC	343.7
X245	Young	2	23	aSMA IHC	165.16
X245	Young	2	23	aSMA IHC	483.35
X245	Young	2	23	aSMA IHC	339.59
X245	Young	2	23	aSMA IHC	161.14
X245	Young	2	23	aSMA IHC	437.47
X245	Young	2	23	aSMA IHC	1003.51
X245	Young	2	22	CD68 IHC	257.03
X245	Young	2	22	CD68 IHC	356.09
X245	Young	2	22	CD68 IHC	393.55
X245	Young	2	22	CD68 IHC	256.69
X245	Young	2	22	CD68 IHC	442.39
X245	Young	2	22	CD68 IHC	131.61
X245	Young	2	22	CD68 IHC	248.93
X245	Young	2	22	CD68 IHC	799.11
X245	Young	2	22	CD68 IHC	628.01
X245	Young	2	22	CD68 IHC	787.06
X245	Young	2	22	CD68 IHC	491.38
X245	Young	2	22	CD68 IHC	337.09
X245	Young	2	22	CD68 IHC	184.36
X245	Young	2	22	CD68 IHC	272.41
X245	Young	2	22	CD68 IHC	796.24
X245	Young	2	22	CD68 IHC	455.79
X245	Young	2	22	CD68 IHC	770.57
X245	Young	2	22	CD68 IHC	836.95
X245	Young	2	22	CD68 IHC	356.3
X245	Young	2	22	CD68 IHC	633.67
X245	Young	2	22	CD68 IHC	345.67
X245	Young	2	22	CD68 IHC	516.45
X245	Young	2	22	CD68 IHC	692.8
X245	Young	2	22	CD68 IHC	555.16
X245	Young	2	22	CD68 IHC	204.59
X245	Young	2	22	CD68 IHC	308.63
X245	Young	2	22	CD68 IHC	361.03
X245	Young	2	24	SABgal	633.03
X245	Young	2	24	SABgal	441.28
X245	Young	2	24	SABgal	594.23
X245	Young	2	24	SABgal	468.44
X245	Young	2	24	SABgal	1340.88
X245	Young	2	24	SABgal	758.22
X245	Young	2	24	SABgal	679.21
X245	Young	2	24	SABgal	315.94
X245	Young	2	24	SABgal	505
X245	Young	2	24	SABgal	447.25
X245	Young	2	24	SABgal	492.05
X245	Young	2	24	SABgal	618.9
X245	Young	2	24	SABgal	414.63
X245	Young	2	24	SABgal	823.92
X245	Young	2	24	SABgal	335.53
X245	Young	2	24	SABgal	405.85
X245	Young	2	24	SABgal	265.41
X245	Young	2	24	SABgal	137.93
X245	Young	2	24	SABgal	230.21
X245	Young	2	24	SABgal	202.2
X245	Young	2	24	SABgal	1096.04
X245	Young	2	24	SABgal	614.76
X245	Young	2	24	SABgal	533.21
X245	Young	2	24	SABgal	415
X245	Young	2	24	SABgal	929.57
X245	Young	2	24	SABgal	287.84
X245	Young	2	27	Trichrome	376.87
X245	Young	2	27	Trichrome	181.83
X245	Young	2	27	Trichrome	236.13
X245	Young	2	27	Trichrome	629.88
X245	Young	2	27	Trichrome	388.08
X245	Young	2	27	Trichrome	361.47
X245	Young	2	27	Trichrome	677.68
X245	Young	2	27	Trichrome	244.3
X245	Young	2	27	Trichrome	200.77
X245	Young	2	27	Trichrome	293.25
X245	Young	2	27	Trichrome	637.33
X245	Young	2	27	Trichrome	879.58
X245	Young	2	27	Trichrome	880.6
X245	Young	2	27	Trichrome	997.18
X245	Young	2	27	Trichrome	587.3
X245	Young	2	27	Trichrome	793.24
X245	Young	2	27	Trichrome	201.77
X245	Young	2	27	Trichrome	373.21
X245	Young	2	27	Trichrome	498.98
X245	Young	2	27	Trichrome	331.7
X245	Young	2	27	Trichrome	343.15
X245	Young	2	27	Trichrome	591.34
X245	Young	2	27	Trichrome	947.59
X245	Young	2	27	Trichrome	1039.62
X245	Young	2	27	Trichrome	225.78
X245	Young	2	27	Trichrome	296.41
X245	Young	2	27	Trichrome	344.21
X245	Young	2	27	Trichrome	525.72
X245	Young	2	27	Trichrome	247.82
X245	Young	2	27	Trichrome	344.06
X245	Young	2	27	Trichrome	465.3
X245	Young	2	27	Trichrome	585.24
X245	Young	2	27	Trichrome	468.4
X245	Young	2	27	Trichrome	543.03
X245	Young	2	27	Trichrome	377.77
X247	Young	2	38	aSMA IHC	1230.92
X247	Young	2	38	aSMA IHC	411.59
X247	Young	2	38	aSMA IHC	713.97
X247	Young	2	38	aSMA IHC	517.13
X247	Young	2	38	aSMA IHC	672.97
X247	Young	2	38	aSMA IHC	167.64
X247	Young	2	38	aSMA IHC	436.85
X247	Young	2	38	aSMA IHC	215.45
X247	Young	2	38	aSMA IHC	991.11
X247	Young	2	38	aSMA IHC	1142.15
X247	Young	2	38	aSMA IHC	494.58
X247	Young	2	38	aSMA IHC	590.1
X247	Young	2	38	aSMA IHC	337.86
X247	Young	2	38	aSMA IHC	333.1
X247	Young	2	38	aSMA IHC	737.28
X247	Young	2	38	aSMA IHC	263.23
X247	Young	2	38	aSMA IHC	228.76
X247	Young	2	38	aSMA IHC	955.57
X247	Young	2	38	aSMA IHC	693.33
X247	Young	2	38	aSMA IHC	347.97
X247	Young	2	38	aSMA IHC	249.9
X247	Young	2	38	aSMA IHC	227.11
X247	Young	2	38	aSMA IHC	241.6
X247	Young	2	38	aSMA IHC	364.76
X247	Young	2	38	aSMA IHC	152.8
X247	Young	2	38	aSMA IHC	333.48
X247	Young	2	38	aSMA IHC	401.41
X247	Young	2	38	aSMA IHC	284.68
X247	Young	2	38	aSMA IHC	230.14
X247	Young	2	38	aSMA IHC	697.1
X247	Young	2	38	aSMA IHC	233.34
X247	Young	2	38	aSMA IHC	296.41
X247	Young	2	38	aSMA IHC	428.51
X247	Young	2	38	aSMA IHC	363.41
X247	Young	2	39	CD68 IHC	863.47
X247	Young	2	39	CD68 IHC	266.56
X247	Young	2	39	CD68 IHC	654.62
X247	Young	2	39	CD68 IHC	418.26
X247	Young	2	39	CD68 IHC	403.28
X247	Young	2	39	CD68 IHC	459.86
X247	Young	2	39	CD68 IHC	675.39
X247	Young	2	39	CD68 IHC	285.96
X247	Young	2	39	CD68 IHC	797.54
X247	Young	2	39	CD68 IHC	376.87
X247	Young	2	39	CD68 IHC	341.12
X247	Young	2	39	CD68 IHC	381.02
X247	Young	2	39	CD68 IHC	503.63
X247	Young	2	39	CD68 IHC	230.14
X247	Young	2	39	CD68 IHC	212.93
X247	Young	2	39	CD68 IHC	866.74
X247	Young	2	39	CD68 IHC	97.39
X247	Young	2	39	CD68 IHC	588.95
X247	Young	2	39	CD68 IHC	947.33
X247	Young	2	39	CD68 IHC	732.4
X247	Young	2	39	CD68 IHC	513.94
X247	Young	2	39	CD68 IHC	274.42
X247	Young	2	39	CD68 IHC	384.5
X247	Young	2	39	CD68 IHC	268.53
X247	Young	2	39	CD68 IHC	472.06
X247	Young	2	39	CD68 IHC	218.53
X247	Young	2	40	SABgal	1016.51
X247	Young	2	40	SABgal	896.27
X247	Young	2	40	SABgal	773.59
X247	Young	2	40	SABgal	1462.1
X247	Young	2	40	SABgal	1029.95
X247	Young	2	40	SABgal	548.64
X247	Young	2	40	SABgal	657.83
X247	Young	2	40	SABgal	1802.45
X247	Young	2	40	SABgal	579.56
X247	Young	2	40	SABgal	442.51
X247	Young	2	40	SABgal	273.09
X247	Young	2	40	SABgal	1127.54
X247	Young	2	40	SABgal	199.08
F427	Aged	3	21	aSMA IHC	358.48
F427	Aged	3	21	aSMA IHC	390.37
F427	Aged	3	21	aSMA IHC	391.22
F427	Aged	3	21	aSMA IHC	471
F427	Aged	3	21	aSMA IHC	477.18
F427	Aged	3	21	aSMA IHC	514.99
F427	Aged	3	21	aSMA IHC	621.08
F427	Aged	3	21	aSMA IHC	853.39
F427	Aged	3	21	aSMA IHC	889.73
F427	Aged	3	21	aSMA IHC	891.52
F427	Aged	3	21	aSMA IHC	1914.45
F427	Aged	3	22	CD68 IHC	155.92
F427	Aged	3	22	CD68 IHC	71.58
F427	Aged	3	22	CD68 IHC	408.56
F427	Aged	3	22	CD68 IHC	503.71
F427	Aged	3	22	CD68 IHC	640.02
F427	Aged	3	22	CD68 IHC	348.05
F427	Aged	3	22	CD68 IHC	156.57
F427	Aged	3	22	CD68 IHC	303.61
F427	Aged	3	22	CD68 IHC	2547.68
F427	Aged	3	22	CD68 IHC	882.52
F427	Aged	3	22	CD68 IHC	812.06
F427	Aged	3	22	CD68 IHC	329.92
F427	Aged	3	22	CD68 IHC	715.96
F427	Aged	3	22	CD68 IHC	1138.95
F427	Aged	3	22	CD68 IHC	161.41
F427	Aged	3	25	SABgal	319.23
F427	Aged	3	25	SABgal	248.09
F427	Aged	3	25	SABgal	888.79
F427	Aged	3	25	SABgal	323.75
F427	Aged	3	25	SABgal	828.33
F427	Aged	3	25	SABgal	1157.58
F427	Aged	3	25	SABgal	307.05
F427	Aged	3	25	SABgal	381.22
F427	Aged	3	25	SABgal	550.8
F427	Aged	3	25	SABgal	295.53
F427	Aged	3	25	SABgal	298.65
F427	Aged	3	25	SABgal	279.9
F427	Aged	3	25	SABgal	332.7
F427	Aged	3	25	SABgal	238.05
F427	Aged	3	25	SABgal	480.18
F427	Aged	3	13	Trichrome	185.05
F427	Aged	3	13	Trichrome	671.94
F427	Aged	3	13	Trichrome	969.11
F427	Aged	3	13	Trichrome	446.68
F427	Aged	3	13	Trichrome	319.53
F427	Aged	3	13	Trichrome	173.9
F427	Aged	3	13	Trichrome	354.44
F427	Aged	3	13	Trichrome	587.36
F427	Aged	3	13	Trichrome	351.69
F427	Aged	3	13	Trichrome	347.99
F427	Aged	3	13	Trichrome	292.48
F427	Aged	3	13	Trichrome	333.48
F427	Aged	3	13	Trichrome	1444.92
F427	Aged	3	13	Trichrome	964.13
F427	Aged	3	13	Trichrome	889.77
F427	Aged	3	13	Trichrome	999.28
F427	Aged	3	13	Trichrome	679.26
F427	Aged	3	13	Trichrome	338.16
F427	Aged	3	13	Trichrome	509.88
F427	Aged	3	13	Trichrome	312.97
F427	Aged	3	13	Trichrome	1133.66
R053	Aged	3	37	aSMA IHC	427.54
R053	Aged	3	37	aSMA IHC	660.06
R053	Aged	3	37	aSMA IHC	594.12
R053	Aged	3	37	aSMA IHC	882.87
R053	Aged	3	37	aSMA IHC	464.76
R053	Aged	3	37	aSMA IHC	156.06
R053	Aged	3	37	aSMA IHC	759.87
R053	Aged	3	37	aSMA IHC	291.88
R053	Aged	3	37	aSMA IHC	117.1
R053	Aged	3	37	aSMA IHC	450.13
R053	Aged	3	37	aSMA IHC	2252.46
R053	Aged	3	37	aSMA IHC	207.66
R053	Aged	3	37	aSMA IHC	290.8
R053	Aged	3	37	aSMA IHC	548.67
R053	Aged	3	37	aSMA IHC	708.39
R053	Aged	3	37	aSMA IHC	609.11
R053	Aged	3	37	aSMA IHC	776.83
R053	Aged	3	37	aSMA IHC	171.57
R053	Aged	3	37	aSMA IHC	680.79
R053	Aged	3	37	aSMA IHC	422.09
R053	Aged	3	37	aSMA IHC	382.04
R053	Aged	3	37	aSMA IHC	1499.88
R053	Aged	3	37	aSMA IHC	744.87
R053	Aged	3	37	aSMA IHC	234.2
R053	Aged	3	37	aSMA IHC	910.61
R053	Aged	3	37	aSMA IHC	1094.14
R053	Aged	3	37	aSMA IHC	813.15
R053	Aged	3	37	aSMA IHC	1729.25
R053	Aged	3	37	aSMA IHC	1490.7
R053	Aged	3	37	aSMA IHC	823.5
R053	Aged	3	37	aSMA IHC	500.24
R053	Aged	3	37	aSMA IHC	412.41
R053	Aged	3	37	aSMA IHC	599.01
R053	Aged	3	37	aSMA IHC	511.46
R053	Aged	3	37	aSMA IHC	422.8
R053	Aged	3	37	aSMA IHC	380.32
R053	Aged	3	37	aSMA IHC	387.82
R053	Aged	3	37	aSMA IHC	292.18
R053	Aged	3	36	CD68 IHC	669.16
R053	Aged	3	36	CD68 IHC	218.7
R053	Aged	3	36	CD68 IHC	217.31
R053	Aged	3	36	CD68 IHC	408.03
R053	Aged	3	36	CD68 IHC	250.7
R053	Aged	3	36	CD68 IHC	296.41
R053	Aged	3	36	CD68 IHC	481.77
R053	Aged	3	36	CD68 IHC	549.15
R053	Aged	3	36	CD68 IHC	481.64
R053	Aged	3	36	CD68 IHC	307.45
R053	Aged	3	36	CD68 IHC	189.88
R053	Aged	3	36	CD68 IHC	186.4
R053	Aged	3	36	CD68 IHC	390.64
R053	Aged	3	36	CD68 IHC	507.01
R053	Aged	3	36	CD68 IHC	655.43
R053	Aged	3	36	CD68 IHC	595.41
R053	Aged	3	36	CD68 IHC	774.64
R053	Aged	3	36	CD68 IHC	249.64
R053	Aged	3	36	CD68 IHC	748.39
R053	Aged	3	36	CD68 IHC	467.22
R053	Aged	3	36	CD68 IHC	516.06
R053	Aged	3	36	CD68 IHC	742.37
R053	Aged	3	36	CD68 IHC	1375.97
R053	Aged	3	36	CD68 IHC	2150.42
R053	Aged	3	36	CD68 IHC	254.68
R053	Aged	3	36	CD68 IHC	608.18
R053	Aged	3	36	CD68 IHC	1028.59
R053	Aged	3	36	CD68 IHC	1009
R053	Aged	3	36	CD68 IHC	448.93
R053	Aged	3	36	CD68 IHC	506.49
R053	Aged	3	36	CD68 IHC	1586.52
R053	Aged	3	36	CD68 IHC	1282.31
R053	Aged	3	36	CD68 IHC	453.33
R053	Aged	3	36	CD68 IHC	1376.4
R053	Aged	3	36	CD68 IHC	430.91
R053	Aged	3	36	CD68 IHC	610.16
R053	Aged	3	36	CD68 IHC	542.93
R053	Aged	3	36	CD68 IHC	681.18
R053	Aged	3	36	CD68 IHC	522.84
R053	Aged	3	36	CD68 IHC	255.77
R053	Aged	3	36	CD68 IHC	130.22
R053	Aged	3	35	SABgal	352.35
R053	Aged	3	35	SABgal	228.75
R053	Aged	3	35	SABgal	321.25
R053	Aged	3	35	SABgal	513.18
R053	Aged	3	35	SABgal	515.09
R053	Aged	3	35	SABgal	497.71
R053	Aged	3	35	SABgal	456.61
R053	Aged	3	35	SABgal	589.98
R053	Aged	3	35	SABgal	771.05
R053	Aged	3	35	SABgal	445.16
R053	Aged	3	35	SABgal	218.62
R053	Aged	3	35	SABgal	774.88
R053	Aged	3	35	SABgal	299.27
R053	Aged	3	35	SABgal	342.94
R053	Aged	3	35	SABgal	1266.55
R053	Aged	3	35	SABgal	807.51
R053	Aged	3	35	SABgal	410.58
R053	Aged	3	35	SABgal	347.67
R053	Aged	3	35	SABgal	1197.5
R053	Aged	3	35	SABgal	299.39
R053	Aged	3	35	SABgal	439.71
R053	Aged	3	35	SABgal	506.71
R053	Aged	3	35	SABgal	870.1
R053	Aged	3	35	SABgal	479.67
R053	Aged	3	35	SABgal	442.17
R053	Aged	3	35	SABgal	561.5
R053	Aged	3	35	SABgal	797.49
R053	Aged	3	35	SABgal	495.08
R053	Aged	3	35	SABgal	100.17
R053	Aged	3	35	SABgal	1879.98
R053	Aged	3	35	SABgal	462.94
R053	Aged	3	35	SABgal	777.86
R053	Aged	3	35	SABgal	174.62
R053	Aged	3	35	SABgal	224.44
R053	Aged	3	35	SABgal	160.9
R053	Aged	3	35	SABgal	270.4
R053	Aged	3	35	SABgal	448.89
R053	Aged	3	35	SABgal	466.31
R053	Aged	3	35	SABgal	503.62
R053	Aged	3	29	Trichrome	383.13
R053	Aged	3	29	Trichrome	426.83
R053	Aged	3	29	Trichrome	537.65
R053	Aged	3	29	Trichrome	652.08
R053	Aged	3	29	Trichrome	436.62
R053	Aged	3	29	Trichrome	642.07
R053	Aged	3	29	Trichrome	656.71
R053	Aged	3	29	Trichrome	322
R053	Aged	3	29	Trichrome	576.58
R053	Aged	3	29	Trichrome	1527.67
R053	Aged	3	29	Trichrome	1998.86
R053	Aged	3	29	Trichrome	2000.17
R053	Aged	3	29	Trichrome	551.14
R053	Aged	3	29	Trichrome	340.57
R053	Aged	3	29	Trichrome	380.85
R053	Aged	3	29	Trichrome	798.32
R053	Aged	3	29	Trichrome	274.23
R053	Aged	3	29	Trichrome	187.41
R053	Aged	3	29	Trichrome	233.39
R053	Aged	3	29	Trichrome	332.16
R053	Aged	3	29	Trichrome	260.16
R053	Aged	3	29	Trichrome	300.04
R053	Aged	3	29	Trichrome	165.45
R053	Aged	3	29	Trichrome	390.22
R053	Aged	3	29	Trichrome	175.2
R053	Aged	3	29	Trichrome	306.35
R053	Aged	3	29	Trichrome	566.83
R053	Aged	3	29	Trichrome	219.9
R053	Aged	3	29	Trichrome	480.41
R053	Aged	3	29	Trichrome	330.68
R053	Aged	3	29	Trichrome	550.69
R053	Aged	3	29	Trichrome	220.25
R126	Aged	3	46	CD68 IHC	397.82
R126	Aged	3	46	CD68 IHC	363.17
R126	Aged	3	46	CD68 IHC	802.95
R126	Aged	3	46	CD68 IHC	379.79
R126	Aged	3	46	CD68 IHC	659.1
R126	Aged	3	46	CD68 IHC	525.36
R126	Aged	3	46	CD68 IHC	164.31
R126	Aged	3	46	CD68 IHC	717.57
R126	Aged	3	46	CD68 IHC	275.93
R126	Aged	3	46	CD68 IHC	363.17
R126	Aged	3	46	CD68 IHC	812.44
R126	Aged	3	46	CD68 IHC	462.45
R126	Aged	3	46	CD68 IHC	226.33
R126	Aged	3	46	CD68 IHC	494.02
R126	Aged	3	46	CD68 IHC	405.18
R126	Aged	3	46	CD68 IHC	697.51
R126	Aged	3	46	CD68 IHC	477.81
R126	Aged	3	46	CD68 IHC	806.45
R126	Aged	3	45	SABgal	171.32
R126	Aged	3	45	SABgal	233.24
R126	Aged	3	45	SABgal	286.85
R126	Aged	3	45	SABgal	579.09
R126	Aged	3	45	SABgal	443.04
R126	Aged	3	45	SABgal	661.85
R126	Aged	3	45	SABgal	564.35
R126	Aged	3	45	SABgal	174.2
R126	Aged	3	45	SABgal	214.35
R126	Aged	3	45	SABgal	735.28
R126	Aged	3	45	SABgal	737.8
R126	Aged	3	45	SABgal	251.61
R126	Aged	3	45	SABgal	549.78
R126	Aged	3	45	SABgal	493.76
R126	Aged	3	45	SABgal	468.17
R245	Aged	3	2	SABgal	352.19
R245	Aged	3	2	SABgal	352.67
R245	Aged	3	2	SABgal	915.66
R4304	Aged	3	31	aSMA IHC	395.07
R4304	Aged	3	31	aSMA IHC	275.57
R4304	Aged	3	31	aSMA IHC	199.7
R4304	Aged	3	31	aSMA IHC	203.49
R4304	Aged	3	31	aSMA IHC	278.78
R4304	Aged	3	31	aSMA IHC	708.88
R4304	Aged	3	31	aSMA IHC	352.64
R4304	Aged	3	31	aSMA IHC	351.55
R4304	Aged	3	31	aSMA IHC	451.64
R4304	Aged	3	31	aSMA IHC	677.63
R4304	Aged	3	31	aSMA IHC	586.63
R4304	Aged	3	31	aSMA IHC	298
R4304	Aged	3	31	aSMA IHC	221.77
R4304	Aged	3	31	aSMA IHC	1296.11
R4304	Aged	3	31	aSMA IHC	1620.47
R4304	Aged	3	31	aSMA IHC	839.01
R4304	Aged	3	31	aSMA IHC	975.32
R4304	Aged	3	31	aSMA IHC	495.11
R4304	Aged	3	31	aSMA IHC	1213.88
R4304	Aged	3	31	aSMA IHC	307.06
R4304	Aged	3	31	aSMA IHC	490.59
R4304	Aged	3	31	aSMA IHC	153.53
R4304	Aged	3	31	aSMA IHC	915.69
R4304	Aged	3	31	aSMA IHC	264.48
R4304	Aged	3	31	aSMA IHC	436
R4304	Aged	3	29	CD68 IHC	589.16
R4304	Aged	3	29	CD68 IHC	188.88
R4304	Aged	3	29	CD68 IHC	1030.11
R4304	Aged	3	29	CD68 IHC	271.08
R4304	Aged	3	29	CD68 IHC	468.05
R4304	Aged	3	29	CD68 IHC	192.01
R4304	Aged	3	29	CD68 IHC	425.94
R4304	Aged	3	29	CD68 IHC	277.73
R4304	Aged	3	29	CD68 IHC	725.17
R4304	Aged	3	29	CD68 IHC	142.6
R4304	Aged	3	29	CD68 IHC	518.94
R4304	Aged	3	29	CD68 IHC	448.98
R4304	Aged	3	29	CD68 IHC	823.96
R4304	Aged	3	29	CD68 IHC	434.22
R4304	Aged	3	29	CD68 IHC	803.47
R4304	Aged	3	29	CD68 IHC	342.45
R4304	Aged	3	29	CD68 IHC	257.17
R4304	Aged	3	29	CD68 IHC	373.86
R4304	Aged	3	29	CD68 IHC	1222.91
R4304	Aged	3	29	CD68 IHC	1302.43
R4304	Aged	3	29	CD68 IHC	2029.73
R4304	Aged	3	29	CD68 IHC	390.26
R4304	Aged	3	29	CD68 IHC	246.02
R4304	Aged	3	29	CD68 IHC	523.75
R4304	Aged	3	29	CD68 IHC	199.72
R4304	Aged	3	29	CD68 IHC	135.08
R4304	Aged	3	35	SABgal	284.21
R4304	Aged	3	35	SABgal	344.26
R4304	Aged	3	35	SABgal	305.67
R4304	Aged	3	35	SABgal	497.65
R4304	Aged	3	35	SABgal	536.08
R4304	Aged	3	35	SABgal	561.96
R4304	Aged	3	35	SABgal	966.7
R4304	Aged	3	35	SABgal	677.56
R4304	Aged	3	35	SABgal	1073.61
R4304	Aged	3	35	SABgal	719.29
R4304	Aged	3	35	SABgal	1478.49
R4304	Aged	3	35	SABgal	479.58
R4304	Aged	3	35	SABgal	122.88
R4304	Aged	3	35	SABgal	879.43
R4304	Aged	3	35	SABgal	1207.49
R4304	Aged	3	35	SABgal	416.55
R4304	Aged	3	35	SABgal	1139.36
R4304	Aged	3	35	SABgal	1186.18
R4304	Aged	3	35	SABgal	289.67
R4304	Aged	3	35	SABgal	879.34
R4304	Aged	3	35	SABgal	463.85
R4304	Aged	3	30	Trichrome	297.77
R4304	Aged	3	30	Trichrome	259.53
R4304	Aged	3	30	Trichrome	523.13
R4304	Aged	3	30	Trichrome	805.81
R4304	Aged	3	30	Trichrome	228.76
R4304	Aged	3	30	Trichrome	376.03
R4304	Aged	3	30	Trichrome	249.04
R4304	Aged	3	30	Trichrome	1380.14
R4304	Aged	3	30	Trichrome	1750.67
R4304	Aged	3	30	Trichrome	1005.45
R4304	Aged	3	30	Trichrome	910.06
R4304	Aged	3	30	Trichrome	495.54
R4304	Aged	3	30	Trichrome	714.04
R4304	Aged	3	30	Trichrome	212.57
R4304	Aged	3	30	Trichrome	249.04
R4304	Aged	3	30	Trichrome	126.3
R4304	Aged	3	30	Trichrome	404.84
R4304	Aged	3	30	Trichrome	597.41
R4304	Aged	3	30	Trichrome	598.1
R4304	Aged	3	30	Trichrome	467.46
R4304	Aged	3	30	Trichrome	924.54
R4304	Aged	3	30	Trichrome	1095.43
R4304	Aged	3	30	Trichrome	1249.94
R4304	Aged	3	30	Trichrome	571.79
R485	Aged	3	11	aSMA IHC	307.98
R485	Aged	3	11	aSMA IHC	142.76
R485	Aged	3	11	aSMA IHC	174.99
R485	Aged	3	11	aSMA IHC	263.33
R485	Aged	3	11	aSMA IHC	239.77
R485	Aged	3	11	aSMA IHC	277.02
R485	Aged	3	11	aSMA IHC	435.24
R485	Aged	3	11	aSMA IHC	110.01
R485	Aged	3	11	aSMA IHC	168.24
R485	Aged	3	11	aSMA IHC	484.69
R485	Aged	3	11	aSMA IHC	268.86
R485	Aged	3	11	aSMA IHC	231.23
R485	Aged	3	11	aSMA IHC	439.95
R485	Aged	3	11	aSMA IHC	278.24
R485	Aged	3	5	SABgal	221.46
R485	Aged	3	5	SABgal	454.33
R485	Aged	3	5	SABgal	422.25
R485	Aged	3	5	SABgal	243.16
R485	Aged	3	5	SABgal	136.54
R485	Aged	3	5	SABgal	368.07
R485	Aged	3	5	SABgal	394.5
R485	Aged	3	5	SABgal	426.2
R485	Aged	3	5	SABgal	311.19
R485	Aged	3	5	SABgal	1243.89
R485	Aged	3	5	SABgal	1008.03
R485	Aged	3	5	SABgal	1717.29
R485	Aged	3	5	SABgal	1223.66
R485	Aged	3	5	SABgal	495.1
R485	Aged	3	5	SABgal	455.75
R485	Aged	3	5	SABgal	354.49
R485	Aged	3	5	SABgal	287.7
R485	Aged	3	8	Trichrome	455.44
R485	Aged	3	8	Trichrome	131.66
R485	Aged	3	8	Trichrome	477.18
R485	Aged	3	8	Trichrome	368.87
R485	Aged	3	8	Trichrome	545.48
R485	Aged	3	8	Trichrome	163.31
R485	Aged	3	8	Trichrome	190.87
R485	Aged	3	8	Trichrome	252.05
R485	Aged	3	8	Trichrome	289.54
R485	Aged	3	8	Trichrome	324.18
R485	Aged	3	8	Trichrome	237.67
R485	Aged	3	8	Trichrome	338.46
R485	Aged	3	8	Trichrome	221.22
R485	Aged	3	8	Trichrome	172.96
R485	Aged	3	8	Trichrome	170.54
R485	Aged	3	8	Trichrome	205.66
R485	Aged	3	8	Trichrome	372.57
R485	Aged	3	8	Trichrome	439.61
R485	Aged	3	8	Trichrome	122.15
R485	Aged	3	8	Trichrome	332.5
R485	Aged	3	8	Trichrome	299.16
R485	Aged	3	8	Trichrome	127.88
R485	Aged	3	8	Trichrome	354.15
R485	Aged	3	8	Trichrome	303.04
X176	Aged	3	26	CD68 IHC	1045.8
X176	Aged	3	26	CD68 IHC	508.57
X176	Aged	3	26	CD68 IHC	350.4
X176	Aged	3	26	CD68 IHC	402.34
X176	Aged	3	26	CD68 IHC	905.73
X176	Aged	3	26	CD68 IHC	570
X176	Aged	3	26	CD68 IHC	1341.98
X176	Aged	3	26	CD68 IHC	602.25
X176	Aged	3	26	CD68 IHC	713.14
X176	Aged	3	26	CD68 IHC	1131.89
X176	Aged	3	26	CD68 IHC	217.03
X176	Aged	3	26	CD68 IHC	536.81
X176	Aged	3	26	CD68 IHC	142.76
X176	Aged	3	26	CD68 IHC	579.97
X176	Aged	3	26	CD68 IHC	270.12
X176	Aged	3	26	CD68 IHC	343.22
X176	Aged	3	26	CD68 IHC	180.65
X176	Aged	3	26	CD68 IHC	698.58
X176	Aged	3	26	CD68 IHC	121.42
X176	Aged	3	26	CD68 IHC	579.23
X176	Aged	3	26	CD68 IHC	998.15
X176	Aged	3	26	CD68 IHC	834.62
X176	Aged	3	26	CD68 IHC	228.87
X176	Aged	3	26	CD68 IHC	717.94
X176	Aged	3	26	CD68 IHC	976.38
X176	Aged	3	26	CD68 IHC	361.71
X176	Aged	3	26	CD68 IHC	724.27
X176	Aged	3	26	CD68 IHC	302.04
X176	Aged	3	26	CD68 IHC	235.06
X176	Aged	3	26	CD68 IHC	241.6
[truncated: 998 more rows]

## Sheet: Panel C
Filename	Rabbit ID	Age Group	Weeks Post-MI	Nwp = Number of Weak Positive	Np = Number of Positive	Nsp = Number of Strong Positive	Iwp = Total Intensity of Weak Positive	Ip = Total Intensity of Positive	Isp = Total Intensity of Strong Positive	Iavg = (Iwp+Ip+Isp)/(Nwp+Np+Nsp)	Nsr = Nsp/(Nwp+Np+Nsp)	Iwavg= (Iwp+Ip)/(Nwp+Np)	Nn = Number of Negative	In = Total Intensity of Negative	NTotal = Total Number (Positive+Negative)	ATotal = Total Area (millimeter-squared)	Positivity = NPositive/NTotal	Positivity %
CH233 Trichrome Slide 15 2018_05_24	CH233	Aged	1	25772487	782201753	192932933	4696229302	106220087009	15278656291	126.08	0.19	137.28	4405457908	645711582752	5406365081	340.06	0.19	18.5135
CH311 Trichrome Slide 14 2018_08_30	CH311	Aged	1	41618224	1360295132	547797097	7610514881	180408883700	42818649003	118.4	0.28	134.12	5773550077	779467828291	7723260530	485.8	0.25	25.2447
F981 Trichrome Slide 12 2018_05_2	F981	Aged	1	2357645	346627438	647810271	428670620	42617979992	48168404599	91.51	0.65	123.35	906366944	116645092718	1903162298	119.71	0.52	52.3757
X020 Trichrome slide 10 2018_05_24	X020	Aged	1	54849219	426950862	9630880	10078127085	62941068347	792527045	150.2	0.02	151.56	3353910428	599610279990	3845341389	241.87	0.13	12.7799
5001 Slide 12 Trichrome 2020_12_10	5001	Young	1	31769704	585773814	303242988	5847939105	77806879027	23651943531	116.54	0.33	135.46	2626907333	403202767490	3547693839	223.15	0.26	25.9545
D212 Slide 2 Trichrome 2020_07_01	D212	Young	1	55638692	871304130	754700988	10302378371	114867079237	52685410308	105.76	0.45	135.04	4389600645	511699187501	6071244455	381.89	0.28	27.6985
D216 Trichrome Slide 28 2018_05_31	D216	Young	1	4782233	592944904	557967858	870649887	76029698824	39647554754	100.85	0.48	128.66	2093353681	273584579243	3249048676	204.37	0.36	35.5703
X103 LV Slide 15 Trichrome 2019_07_24	X103	Young	1	55865525	524773101	411066199	10428080735	70430355430	27753024310	109.52	0.41	139.26	3731911896	459676036341	4723616721	297.12	0.21	20.9946
F184 Trichrome 2020-10-22	F184	Aged	2	6503144	352129101	525083636	1195030547	44261487606	34631589391	90.63	0.59	126.75	3723816286	464960322989	4607532167	289.82	0.19	19.1798
F322 Slide 13 Trichrome 2019_07_23	F322	Aged	2	41288660	369259380	489578224	7717938152	49133689579	31567888371	98.23	0.54	138.48	3309368510	376660685373	4209494774	264.78	0.21	21.3832
F949 LV Trichrome 2021_04_14	F949	Aged	2	8322087	114738509	129616301	1548146827	15137404053	8684581540	100.41	0.51	135.59	674071034	75359080298	926747931	231.04	0.27	27.2649
H962 2020_11_16 Trichrome Abby	H962	Aged	2	13004849	547979431	224641681	2378182904	70876205071	18335705950	116.58	0.29	130.58	3957061139	536824961318	4742687100	298.32	0.17	16.565
5043 LV Trichrome 2021_04_14 (2)	5043	Young	2	2655287	86624356	63464719	490530659	11298580882	4635759792	107.53	0.42	132.05	1192907738	159063210725	1345652100	335.47	0.11	11.351
D218 Trichrome Slide 12 2018_05_17	D218	Young	2	10557897	1028233381	793527230	1911892458	132457197230	61316813592	106.8	0.43	129.35	1398389009	209726318114	3230707517	203.21	0.57	56.7157
X115 Slide 1 Trichrome 2020_07_01	X115	Young	2	28413049	536315016	497424481	5279904039	69751792086	36079603665	104.61	0.47	132.86	3616382672	365507160336	4678535218	294.28	0.23	22.7027
X245 Trichrome Slide 27 2018_05_24	X245	Young	2	32347435	1083101408	1216804747	5934905255	140235977559	87004310634	99.98	0.52	131.04	3557834002	476127774943	5890087592	370.49	0.4	39.5962
F427 Slide 13 Trichrome 2019-07-23	F427	Aged	3	36551578	350845972	292914015	6811678327	46727689357	20668286401	109.08	0.43	138.2	2738385225	331225130386	3418696790	215.04	0.2	19.8997
R053 Slide 29 Trichrome 2019-07-23	R053	Aged	3	68751565	428501583	178947156	12810481289	59352839369	13581879603	126.8	0.26	145.12	4417311352	598607675911	5093511656	320.39	0.13	13.2757
R4304 Trichrome Slide 30 2018_06_20	R4304	Aged	3	110392745	1049789091	380322115	20673355593	141178204504	30456880813	124.84	0.25	139.51	2750392583	431356278659	4290896534	269.9	0.36	35.9017
R485 Slide 37 Trichrome Abby 2020-12-07	R485	Aged	3	8129122	316319929	276217774	1481912787	40877223319	21243005903	105.89	0.46	130.56	4196905147	603319671386	4797571972	301.77	0.13	12.5202
X176 Trichrome Slide 28 2018_06_20	X176	Aged	3	3896803	600102996	1976804445	706048092	74547965967	106188847262	70.3	0.77	124.59	6725532275	674723738679	9306336519	585.37	0.28	27.7317
X104 Trichrome Slide 15 2018_05_31	X104	Young	3	25793428	629582028	250006195	4711715880	85210545116	17432951240	118.58	0.28	137.21	3519434754	549328655984	4424816405	278.32	0.2	20.4615
X219 Trichrome Slide 38 2020_12_10 _Scar	X219	Young	3	32378414	351745397	181370371	6008745666	46798287872	14246604148	118.58	0.32	137.47	3318270765	479004299931	3883764947	244.29	0.15	14.5605
X228 Trichrome 2020-10-22	X228	Young	3	5392695	474151263	1013862927	991221472	59084973330	67375504978	85.34	0.68	125.28	5270299426	562152218731	6763706311	425.44	0.22	22.0797
X230 Trichrome 2020-10-22	X230	Young	3	13563052	549759242	278285985	2485815958	71430131992	20702235737	112.43	0.33	131.21	3351307090	464723913846	4192915369	263.74	0.2	20.0722
B1149 LV Slide 32 Trichrome 2019_09_27	B1149	Aged	12	7739432	275379250	1461547948	1420809636	35002106627	72178164772	62.25	0.84	128.65	5319107904	376523776414	7063774534	444.32	0.25	24.6988
F894 Slide 36 Trichrome 2019-07-23	F894	Aged	12	53354294	663853956	701087213	9853110435	88054448961	45663610915	101.23	0.49	136.51	5947417338	728102056578	7365712801	463.31	0.19	19.2554
F985 LV Trichrome 2021_04_14	F985	Aged	12	3600180	97166408	218383077	666712729	12525426893	12626147353	80.9	0.68	130.92	1317272222	122191271955	1636421887	407.96	0.2	19.5029
S1165 LV Slide 2 Trichrome 2019_07_24	S1165	Aged	12	18119395	476567056	1182441706	3338604192	61246380446	67167901235	78.56	0.71	130.56	3549513351	336763686384	5226641508	328.76	0.32	32.0881
91442 Slide 1 Trichrome 2020_07_01	91442	Young	12	38859379	317980491	569631453	7325778348	42359540473	31448825235	87.57	0.61	139.24	2362195216	304774836318	3288666539	206.86	0.28	28.1716
X164 Slide 14 Trichrome 2019-07-23	X164	Young	12
X203 LV Slide 7 Trichrome 2019-07-25	X203	Young	12	5501910	106716751	525990900	1014927355	13793697471	24036036930	60.87	0.82	131.96	3429963899	233340990287	4068173460	255.89	0.16	15.6879
X205 Slide 2 Trichrome 2020_07_01	X205	Young	12	54361303	458998580	676692483	10254467020	60367897747	46093793562	98.08	0.57	137.57	3001491680	398399928018	4191544046	263.65	0.28	28.3917
X209 LV Trichrome 2021_04_14	X209	Young	12	5260658	79186808	69017089	980240600	10372510221	5063855355	106.97	0.45	134.44	1309280703	161957851005	1462745258	364.66	0.1	10.4915

## Sheet: Panel D
					Analysis Filename	Rabbit Trichrome Fibrosis Analysis v1.1 2021_02_16.0 2020_11_01	Rabbit Trichrome Myocardia Analysis v2.1 2020_12_29.0 2020_12_13
					Hue	140-190	215-255
					Saturation	0-255	0-255
					Brightness	0-200	0-255		% Fibrotic Area of Total	% Fibrotic Area of Tissue
Filename	Rabbit ID	Age Group	Weeks Post-MI	Zone	Replicate	Fibrotic Pixels	Myocyte Pixels	Total Pixels	% Fibrotic Area	% Fibrotic Area	% Missing Area	% myocyte area
CH233 Trichrome Slide 15 2018_05_24 RZ 8.tif	CH233	Aged	1	RZ	8	18635	1691169	1822392	1.02256	1.08989	6.17803	92.7994
CH233 Trichrome Slide 15 2018_05_24 RZ 10.tif	CH233	Aged	1	RZ	1	50737	1649371	1822392	2.78409	2.98434	6.71008	90.5058
CH233 Trichrome Slide 15 2018_05_24 RZ 9.tif	CH233	Aged	1	RZ	9	64157	1597170	1822392	3.52048	3.86179	8.83811	87.6414
CH233 Trichrome Slide 15 2018_05_24 RZ 4.tif	CH233	Aged	1	RZ	4	37535	1564799	1822392	2.05966	2.34252	12.0752	85.8651
CH233 Trichrome Slide 15 2018_05_24 RZ 1.tif	CH233	Aged	1	RZ	1	103337	1486133	1822392	5.6704	6.50135	12.7811	81.5485
CH233 Trichrome Slide 15 2018_05_24 RZ 6.tif	CH233	Aged	1	RZ	6	45994	1499592	1822392	2.52383	2.97583	15.1892	82.287
CH233 Trichrome Slide 15 2018_05_24 RZ 7.tif	CH233	Aged	1	RZ	7	69183	1449059	1822392	3.79627	4.55678	16.6896	79.5141
CH233 Trichrome Slide 15 2018_05_24 RZ 3.tif	CH233	Aged	1	RZ	3	66917	1412886	1822392	3.67193	4.52202	18.7989	77.5292
CH233 Trichrome Slide 15 2018_05_24 RZ 2.tif	CH233	Aged	1	RZ	2	51574	1407800	1822392	2.83002	3.53398	19.9199	77.2501
CH233 Trichrome Slide 15 2018_05_24 RZ 5.tif	CH233	Aged	1	RZ	5	67480	1369209	1822392	3.70283	4.69691	21.1647	75.1325
CH233 Trichrome Slide 15 2018_05_24 Scar 2.tif	CH233	Aged	1	Scar	2	931170	303436	1822392	51.096	75.4224	32.2535	16.6504
CH233 Trichrome Slide 15 2018_05_24 Scar 1.tif	CH233	Aged	1	Scar	1	874125	187101	1822392	47.9658	82.3694	41.7674	10.2668
CH233 Trichrome Slide 15 2018_05_24 Scar 6.tif	CH233	Aged	1	Scar	6	901123	41097	1822392	49.4473	95.6383	48.2976	2.25511
CH233 Trichrome Slide 15 2018_05_24 Scar 8.tif	CH233	Aged	1	Scar	8	827642	72958	1822392	45.4151	91.899	50.5814	4.00342
CH233 Trichrome Slide 15 2018_05_24 Scar 7.tif	CH233	Aged	1	Scar	7	848015	34562	1822392	46.5331	96.084	51.5704	1.89652
CH233 Trichrome Slide 15 2018_05_24 Scar 3.tif	CH233	Aged	1	Scar	3	776601	53286	1822392	42.6144	93.5791	54.4617	2.92396
CH233 Trichrome Slide 15 2018_05_24 Scar 5.tif	CH233	Aged	1	Scar	5	768290	52550	1822392	42.1583	93.598	54.9581	2.88357
CH233 Trichrome Slide 15 2018_05_24 Scar 9.tif	CH233	Aged	1	Scar	9	784274	29934	1822392	43.0354	96.3235	55.322	1.64257
CH233 Trichrome Slide 15 2018_05_24 Scar 4.tif	CH233	Aged	1	Scar	4	708258	98853	1822392	38.8642	87.7522	55.7114	5.42435
CH233 Trichrome Slide 15 2018_05_24 Scar 10.tif	CH233	Aged	1	Scar	1	480319	25719	1822392	26.3565	94.9176	72.2322	1.41128
CH331 Trichrome Slide 14 2018_08_30 RZ 10.tif	CH311	Aged	1	RZ	1	13743	1722369	1822392	0.754119	0.791596	4.73444	94.5114
CH331 Trichrome Slide 14 2018_08_30 RZ 7.tif	CH311	Aged	1	RZ	7	43224	1658072	1822392	2.37183	2.54065	6.64489	90.9833
CH331 Trichrome Slide 14 2018_08_30 RZ 6.tif	CH311	Aged	1	RZ	6	24752	1668368	1822392	1.35821	1.46192	7.09353	91.5483
CH331 Trichrome Slide 14 2018_08_30 RZ 8.tif	CH311	Aged	1	RZ	8	21669	1661746	1822392	1.18904	1.2872	7.62608	91.1849
CH331 Trichrome Slide 14 2018_08_30 RZ 4.tif	CH311	Aged	1	RZ	4	17160	1657398	1822392	0.94162	1.02475	8.11209	90.9463
CH331 Trichrome Slide 14 2018_08_30 RZ 2.tif	CH311	Aged	1	RZ	2	22776	1648210	1822392	1.24979	1.36303	8.30809	90.4421
CH331 Trichrome Slide 14 2018_08_30 RZ 9.tif	CH311	Aged	1	RZ	9	61955	1594863	1822392	3.39965	3.7394	9.08553	87.5148
CH331 Trichrome Slide 14 2018_08_30 RZ 3.tif	CH311	Aged	1	RZ	3	24791	1617990	1822392	1.36035	1.50909	9.85578	88.7839
CH331 Trichrome Slide 14 2018_08_30 RZ 1.tif	CH311	Aged	1	RZ	1	28485	1613449	1822392	1.56306	1.73484	9.90226	88.5347
CH331 Trichrome Slide 14 2018_08_30 RZ 5.tif	CH311	Aged	1	RZ	5	24739	1591223	1822392	1.3575	1.53091	11.3274	87.3151
CH331 Trichrome Slide 14 2018_08_30 Scar 9.tif	CH311	Aged	1	Scar	9	1278612	48826	1822392	70.1612	96.3218	27.1596	2.67923
CH331 Trichrome Slide 14 2018_08_30 Scar 4.tif	CH311	Aged	1	Scar	4	1291349	22134	1822392	70.8601	98.3149	27.9253	1.21456
CH331 Trichrome Slide 14 2018_08_30 Scar 3.tif	CH311	Aged	1	Scar	3	1177049	73974	1822392	64.5881	94.0869	31.3527	4.05917
CH331 Trichrome Slide 14 2018_08_30 Scar 6.tif	CH311	Aged	1	Scar	6	1198548	46421	1822392	65.7678	96.2713	31.6849	2.54726
CH331 Trichrome Slide 14 2018_08_30 Scar 7.tif	CH311	Aged	1	Scar	7	1205628	10168	1822392	66.1563	99.1637	33.2857	0.557948
CH331 Trichrome Slide 14 2018_08_30 Scar 2.tif	CH311	Aged	1	Scar	2	1051687	61124	1822392	57.7092	94.5072	38.9368	3.35405
CH331 Trichrome Slide 14 2018_08_30 Scar 8.tif	CH311	Aged	1	Scar	8	1053964	51990	1822392	57.8341	95.2991	39.3131	2.85284
CH331 Trichrome Slide 14 2018_08_30 Scar 1.tif	CH311	Aged	1	Scar	1	1039345	55997	1822392	57.0319	94.8877	39.8954	3.07272
CH331 Trichrome Slide 14 2018_08_30 Scar 5.tif	CH311	Aged	1	Scar	5	933512	55071	1822392	51.2245	94.4293	45.7535	3.02191
CH331 Trichrome Slide 14 2018_08_30 Scar 10.tif	CH311	Aged	1	Scar	1	787123	141903	1822392	43.1918	84.7256	49.0216	7.78663
F891 Trichrome Slide 12 2018_05_2 RZ 9.tif	F981	Aged	1	RZ	9	370790	1047932	1822392	20.3463	26.1355	22.1506	57.5031
F891 Trichrome Slide 12 2018_05_2 RZ 1.tif	F981	Aged	1	RZ	1	329819	1079844	1822392	18.0981	23.397	22.6477	59.2542
F891 Trichrome Slide 12 2018_05_2 RZ 5.tif	F981	Aged	1	RZ	5	304216	1079592	1822392	16.6932	21.984	24.0664	59.2404
F891 Trichrome Slide 12 2018_05_2 RZ 10.tif	F981	Aged	1	RZ	1	223185	1153209	1822392	12.2468	16.2152	24.4732	63.28
F891 Trichrome Slide 12 2018_05_2 RZ 8.tif	F981	Aged	1	RZ	8	252166	1122235	1822392	13.8371	18.3473	24.5826	61.5803
F891 Trichrome Slide 12 2018_05_2 RZ 4.tif	F981	Aged	1	RZ	4	239082	1117172	1822392	13.1191	17.6281	25.5784	61.3025
F891 Trichrome Slide 12 2018_05_2 RZ 6.tif	F981	Aged	1	RZ	6	225467	1098443	1822392	12.372	17.0304	27.3532	60.2748
F891 Trichrome Slide 12 2018_05_2 RZ 2.tif	F981	Aged	1	RZ	2	362894	956342	1822392	19.9131	27.5079	27.6096	52.4773
F891 Trichrome Slide 12 2018_05_2 RZ 7.tif	F981	Aged	1	RZ	7	318062	965980	1822392	17.453	24.7704	29.5408	53.0062
F891 Trichrome Slide 12 2018_05_2 RZ 3.tif	F981	Aged	1	RZ	3	271885	921749	1822392	14.9191	22.7779	34.5018	50.5791
F891 Trichrome Slide 12 2018_05_2 Scar 5.tif	F981	Aged	1	Scar	5	1560131	18763	1822392	85.609	98.8116	13.3615	1.02958
F891 Trichrome Slide 12 2018_05_2 Scar 10.tif	F981	Aged	1	Scar	1	1419067	140374	1822392	77.8684	90.9984	14.4289	7.70273
F891 Trichrome Slide 12 2018_05_2 Scar 8.tif	F981	Aged	1	Scar	8	1344066	103831	1822392	73.7528	92.8288	20.5496	5.69751
F891 Trichrome Slide 12 2018_05_2 Scar 2.tif	F981	Aged	1	Scar	2	1342019	104679	1822392	73.6405	92.7643	20.6154	5.74404
F891 Trichrome Slide 12 2018_05_2 Scar 4.tif	F981	Aged	1	Scar	4	1254459	157508	1822392	68.8358	88.8448	22.5212	8.64293
F891 Trichrome Slide 12 2018_05_2 Scar 9.tif	F981	Aged	1	Scar	9	1298105	84380	1822392	71.2308	93.8965	24.139	4.63018
F891 Trichrome Slide 12 2018_05_2 Scar 1.tif	F981	Aged	1	Scar	1	1188333	188124	1822392	65.2073	86.3327	24.4698	10.3229
F891 Trichrome Slide 12 2018_05_2 Scar 3.tif	F981	Aged	1	Scar	3	851026	334847	1822392	46.6983	71.7637	34.9277	18.374
F891 Trichrome Slide 12 2018_05_2 Scar 7.tif	F981	Aged	1	Scar	7	935270	242925	1822392	51.321	79.3816	35.349	13.33
F891 Trichrome Slide 12 2018_05_2 Scar 6.tif	F981	Aged	1	Scar	6	1006427	161351	1822392	55.2256	86.1831	35.9206	8.8538
X020 Trichrome slide 10 2018_05_24 Scar 1	X020	Aged	1	Scar	1	721575	156101	1616472	44.6389	82.2143	45.7042	9.65689
X020 Trichrome slide 10 2018_05_24 Scar 2	X020	Aged	1	Scar	2	404088	233852	1616472	24.9981	63.3426	60.535	14.4668
X020 Trichrome slide 10 2018_05_24 Scar 3	X020	Aged	1	Scar	3	891534	71064	1616472	55.1531	92.6175	40.4507	4.39624
X020 Trichrome slide 10 2018_05_24 Scar 4	X020	Aged	1	Scar	4	880467	70320	1616472	54.4684	92.604	41.1814	4.35021
X020 Trichrome slide 10 2018_05_24 Scar 5	X020	Aged	1	Scar	5	556053	100777	1616472	34.3992	84.6571	59.3664	6.23438
X020 Trichrome slide 10 2018_05_24 Scar 6	X020	Aged	1	Scar	6	983872	7249	1616472	60.8654	99.2686	38.6862	0.448446
X020 Trichrome slide 10 2018_05_24 Scar 7	X020	Aged	1	Scar	7	562102	94801	1616472	34.7734	85.5685	59.3619	5.86469
X020 Trichrome slide 10 2018_05_24 Scar 8	X020	Aged	1	Scar	8	530389	48130	1616472	32.8115	91.6805	64.211	2.97747
X020 Trichrome slide 10 2018_05_24 Scar 9	X020	Aged	1	Scar	9	533300	214698	1616472	32.9916	71.297	53.7265	13.2819
X020 Trichrome slide 10 2018_05_24 Scar 10	X020	Aged	1	Scar	10	582352	90577	1616472	36.0261	86.5399	58.3705	5.60338
X020 Trichrome slide 10 2018_05_24 RZ 1	X020	Aged	1	RZ	1	247	1414166	1616472	0.0152802	0.0174631	12.5	87.4847
X020 Trichrome slide 10 2018_05_24 RZ 2	X020	Aged	1	RZ	2	159	1485791	1616472	0.00983624	0.0107002	8.0745	91.9157
X020 Trichrome slide 10 2018_05_24 RZ 3	X020	Aged	1	RZ	3	295	1519909	1616472	0.0182496	0.0194053	5.95544	94.0263
X020 Trichrome slide 10 2018_05_24 RZ 4	X020	Aged	1	RZ	4	2647	1477230	1616472	0.163752	0.178866	8.45019	91.3861
X020 Trichrome slide 10 2018_05_24 RZ 5	X020	Aged	1	RZ	5	4547	1484468	1616472	0.281292	0.30537	7.88489	91.8338
X020 Trichrome slide 10 2018_05_24 RZ 6	X020	Aged	1	RZ	6	672	1535309	1616472	0.041572	0.0437505	4.97942	94.979
X020 Trichrome slide 10 2018_05_24 RZ 7	X020	Aged	1	RZ	7	15255	1510143	1616472	0.943722	1.00007	5.63412	93.4222
X020 Trichrome slide 10 2018_05_24 RZ 8	X020	Aged	1	RZ	8	5221	1306052	1616472	0.322987	0.398163	18.8806	80.7965
X020 Trichrome slide 10 2018_05_24 RZ 9	X020	Aged	1	RZ	9	1160	1464137	1616472	0.0717612	0.0791648	9.35216	90.5761
X020 Trichrome slide 10 2018_05_24 RZ 10	X020	Aged	1	RZ	10	824	1531732	1616472	0.0509752	0.0537664	5.19131	94.7577
F184 Trichrome 2020-10-22 RZ 9.tif	F184	Aged	2	RZ	9	10965	1769898	1822392	0.601682	0.615713	2.27882	97.1195
F184 Trichrome 2020-10-22 RZ 7.tif	F184	Aged	2	RZ	7	8607	1763581	1822392	0.472291	0.485671	2.75484	96.7729
F184 Trichrome 2020-10-22 RZ 4.tif	F184	Aged	2	RZ	4	5991	1759303	1822392	0.328744	0.339377	3.13313	96.5381
F184 Trichrome 2020-10-22 RZ 8.tif	F184	Aged	2	RZ	8	23263	1739593	1822392	1.27651	1.31962	3.26692	95.4566
F184 Trichrome 2020-10-22 RZ 6.tif	F184	Aged	2	RZ	6	50321	1700946	1822392	2.76126	2.87341	3.90284	93.3359
F184 Trichrome 2020-10-22 RZ 10.tif	F184	Aged	2	RZ	1	11475	1734621	1822392	0.629667	0.65718	4.18659	95.1837
F184 Trichrome 2020-10-22 RZ 5.tif	F184	Aged	2	RZ	5	14644	1707626	1822392	0.803559	0.850273	5.49399	93.7025
F184 Trichrome 2020-10-22 RZ 1.tif	F184	Aged	2	RZ	1	33739	1679451	1822392	1.85136	1.96937	5.99223	92.1564
F184 Trichrome 2020-10-22 RZ 3.tif	F184	Aged	2	RZ	3	59987	1618140	1822392	3.29166	3.57464	7.91624	88.7921
F184 Trichrome 2020-10-22 RZ 2.tif	F184	Aged	2	RZ	2	23018	1650401	1822392	1.26307	1.37551	8.17459	90.5623
F184 Trichrome 2020-10-22 Scar 7.tif	F184	Aged	2	Scar	7	1409117	53797	1822392	77.3224	96.3226	19.7256	2.952
F184 Trichrome 2020-10-22 Scar 6.tif	F184	Aged	2	Scar	6	1268704	69369	1822392	69.6175	94.8158	26.576	3.80648
F184 Trichrome 2020-10-22 Scar 2.tif	F184	Aged	2	Scar	2	1280190	21489	1822392	70.2478	98.3491	28.5731	1.17916
F184 Trichrome 2020-10-22 Scar 8.tif	F184	Aged	2	Scar	8	1219237	79717	1822392	66.9031	93.863	28.7226	4.37431
F184 Trichrome 2020-10-22 Scar 5.tif	F184	Aged	2	Scar	5	1243319	34174	1822392	68.2246	97.3249	29.9002	1.87523
F184 Trichrome 2020-10-22 Scar 4.tif	F184	Aged	2	Scar	4	1131974	99519	1822392	62.1147	91.9188	32.4244	5.4609
F184 Trichrome 2020-10-22 Scar 9.tif	F184	Aged	2	Scar	9	1124657	37669	1822392	61.7132	96.7592	36.2198	2.06701
F184 Trichrome 2020-10-22 Scar 3.tif	F184	Aged	2	Scar	3	1015576	109117	1822392	55.7276	90.2981	38.2848	5.98757
F184 Trichrome 2020-10-22 Scar 10.tif	F184	Aged	2	Scar	1	1051439	46716	1822392	57.6955	95.746	39.741	2.56344
F184 Trichrome 2020-10-22 Scar 1.tif	F184	Aged	2	Scar	1	953276	42753	1822392	52.3091	95.7077	45.345	2.34598
F322 Slide 13 Trichrome 2019_07_23 RZ 6.tif	F322	Aged	2	RZ	6	63490	1704261	1822392	3.48388	3.59157	2.99831	93.5178
F322 Slide 13 Trichrome 2019_07_23 RZ 4.tif	F322	Aged	2	RZ	4	69466	1691650	1822392	3.8118	3.94443	3.36239	92.8258
F322 Slide 13 Trichrome 2019_07_23 RZ 10.tif	F322	Aged	2	RZ	1	67242	1693238	1822392	3.68977	3.81953	3.39729	92.9129
F322 Slide 13 Trichrome 2019_07_23 RZ 3.tif	F322	Aged	2	RZ	3	85729	1661174	1822392	4.7042	4.90748	4.1423	91.1535
F322 Slide 13 Trichrome 2019_07_23 RZ 9.tif	F322	Aged	2	RZ	9	155720	1564424	1822392	8.54481	9.05273	5.61065	85.8445
F322 Slide 13 Trichrome 2019_07_23 RZ 5.tif	F322	Aged	2	RZ	5	67338	1645835	1822392	3.69503	3.9306	5.99317	90.3118
F322 Slide 13 Trichrome 2019_07_23 RZ 2.tif	F322	Aged	2	RZ	2	51058	1655117	1822392	2.8017	2.99254	6.37717	90.8211
F322 Slide 13 Trichrome 2019_07_23 RZ 8.tif	F322	Aged	2	RZ	8	91865	1608984	1822392	5.0409	5.40113	6.66942	88.2897
F322 Slide 13 Trichrome 2019_07_23 RZ 7.tif	F322	Aged	2	RZ	7	55177	1644256	1822392	3.02772	3.24679	6.74712	90.2252
F322 Slide 13 Trichrome 2019_07_23 RZ 1.tif	F322	Aged	2	RZ	1	67794	1542167	1822392	3.72006	4.21091	11.6567	84.6232
F322 Slide 13 Trichrome 2019_07_23 Scar 6.tif	F322	Aged	2	Scar	6	1025867	163983	1822392	56.2923	86.2182	34.7094	8.99823
F322 Slide 13 Trichrome 2019_07_23 Scar 1.tif	F322	Aged	2	Scar	1	951958	156413	1822392	52.2367	85.888	39.1804	8.58284
F322 Slide 13 Trichrome 2019_07_23 Scar 5.tif	F322	Aged	2	Scar	5	957313	150773	1822392	52.5306	86.3934	39.1961	8.27336
F322 Slide 13 Trichrome 2019_07_23 Scar 9.tif	F322	Aged	2	Scar	9	884027	182214	1822392	48.5092	82.9106	41.4922	9.99862
F322 Slide 13 Trichrome 2019_07_23 Scar 2.tif	F322	Aged	2	Scar	2	808050	257752	1822392	44.3401	75.8161	41.5163	14.1436
F322 Slide 13 Trichrome 2019_07_23 Scar 8.tif	F322	Aged	2	Scar	8	879077	181734	1822392	48.2375	82.8684	41.7902	9.97228
F322 Slide 13 Trichrome 2019_07_23 Scar 3.tif	F322	Aged	2	Scar	3	898272	148089	1822392	49.2908	85.8472	42.5831	8.12608
F322 Slide 13 Trichrome 2019_07_23 Scar 4.tif	F322	Aged	2	Scar	4	852244	192954	1822392	46.7651	81.539	42.6469	10.588
F322 Slide 13 Trichrome 2019_07_23 Scar 7.tif	F322	Aged	2	Scar	7	915832	123141	1822392	50.2544	88.1478	42.9885	6.75711
F322 Slide 13 Trichrome 2019_07_23 Scar 10.tif	F322	Aged	2	Scar	1	896649	126056	1822392	49.2018	87.6743	43.8812	6.91706
F949 LV Trichrome 2021_04_14 Scar 1	F949	Aged	2	Scar	1	746543	139994	1616472	46.1835	84.2089	45.1561	8.66047
F949 LV Trichrome 2021_04_14 Scar 2	F949	Aged	2	Scar	2	731393	153684	1616472	45.2463	82.6361	45.2464	9.50737
F949 LV Trichrome 2021_04_14 Scar 3	F949	Aged	2	Scar	3	808167	107256	1616472	49.9957	88.2834	43.3691	6.63519
F949 LV Trichrome 2021_04_14 Scar 4	F949	Aged	2	Scar	4	686218	142581	1616472	42.4516	82.7967	48.7279	8.82051
F949 LV Trichrome 2021_04_14 Scar 5	F949	Aged	2	Scar	5	919765	111193	1616472	56.8995	89.2146	36.2217	6.87875
F949 LV Trichrome 2021_04_14 Scar 6	F949	Aged	2	Scar	6	808055	119903	1616472	49.9888	87.0788	42.5936	7.41757
F949 LV Trichrome 2021_04_14 Scar 7	F949	Aged	2	Scar	7	798303	157187	1616472	49.3855	83.5491	40.8904	9.72408
F949 LV Trichrome 2021_04_14 Scar 8	F949	Aged	2	Scar	8	643091	263955	1616472	39.7836	70.8995	43.8873	16.3291
F949 LV Trichrome 2021_04_14 Scar 9	F949	Aged	2	Scar	9	780190	151224	1616472	48.265	83.764	42.3798	9.35519
F949 LV Trichrome 2021_04_14 Scar 10	F949	Aged	2	Scar	10	903359	80625	1616472	55.8846	91.8063	39.1277	4.98771
F949 LV Trichrome 2021_04_14 RZ 1	F949	Aged	2	RZ	1	112070	942198	1616472	6.933	10.6301	34.7797	58.2873
F949 LV Trichrome 2021_04_14 RZ 2	F949	Aged	2	RZ	2	130628	1044244	1616472	8.08106	11.1185	27.3188	64.6002
F949 LV Trichrome 2021_04_14 RZ 3	F949	Aged	2	RZ	3	110931	927842	1616472	6.86254	10.679	35.7383	57.3992
F949 LV Trichrome 2021_04_14 RZ 4	F949	Aged	2	RZ	4	113756	980729	1616472	7.0373	10.3936	32.2917	60.671
F949 LV Trichrome 2021_04_14 RZ 5	F949	Aged	2	RZ	5	134565	922602	1616472	8.32461	12.7288	34.6004	57.075
F949 LV Trichrome 2021_04_14 RZ 6	F949	Aged	2	RZ	6	109288	977788	1616472	6.7609	10.0534	32.7501	60.489
F949 LV Trichrome 2021_04_14 RZ 7	F949	Aged	2	RZ	7	65199	1040569	1616472	4.03341	5.89626	31.5937	64.3728
F949 LV Trichrome 2021_04_14 RZ 8	F949	Aged	2	RZ	8	78782	1028482	1616472	4.8737	7.11502	31.5012	63.6251
F949 LV Trichrome 2021_04_14 RZ 9	F949	Aged	2	RZ	9	145550	963094	1616472	9.00418	13.1287	31.4158	59.58
F949 LV Trichrome 2021_04_14 RZ 10	F949	Aged	2	RZ	10	105545	1039044	1616472	6.52934	9.22121	29.1922	64.2785
H962 2020_11_16 Trichrome Abby RZ 8.tif	H962	Aged	2	RZ	8	27	728742	730800	0.00369458	0.00370488	0.277915	99.7184
H962 2020_11_16 Trichrome Abby RZ 5.tif	H962	Aged	2	RZ	5	371	726850	730800	0.0507663	0.0510161	0.489737	99.4595
H962 2020_11_16 Trichrome Abby RZ 1.tif	H962	Aged	2	RZ	1	2165	718945	730800	0.296251	0.300232	1.32594	98.3778
H962 2020_11_16 Trichrome Abby RZ 2.tif	H962	Aged	2	RZ	2	7544	707687	730800	1.03229	1.05476	2.13041	96.8373
H962 2020_11_16 Trichrome Abby RZ 6.tif	H962	Aged	2	RZ	6	5484	709557	730800	0.750411	0.766949	2.1564	97.0932
H962 2020_11_16 Trichrome Abby RZ 4.tif	H962	Aged	2	RZ	4	4574	709076	730800	0.625889	0.64093	2.34674	97.0274
H962 2020_11_16 Trichrome Abby RZ 10.tif	H962	Aged	2	RZ	1	4737	708883	730800	0.648194	0.663799	2.35085	97.001
H962 2020_11_16 Trichrome Abby RZ 3.tif	H962	Aged	2	RZ	3	4800	708199	730800	0.656814	0.673213	2.43582	96.9074
H962 2020_11_16 Trichrome Abby RZ 7.tif	H962	Aged	2	RZ	7	9631	699340	730800	1.31787	1.35845	2.987	95.6951
H962 2020_11_16 Trichrome Abby RZ 9.tif	H962	Aged	2	RZ	9	14144	688865	730800	1.93541	2.01192	3.80282	94.2618
H962 2020_11_16 Trichrome Abby Scar 5.tif	H962	Aged	2	Scar	5	547828	19220	730800	74.9628	96.6105	22.4072	2.62999
H962 2020_11_16 Trichrome Abby Scar 10.tif	H962	Aged	2	Scar	1	540562	21393	730800	73.9685	96.1931	23.1041	2.92734
H962 2020_11_16 Trichrome Abby Scar 7.tif	H962	Aged	2	Scar	7	546767	13758	730800	74.8176	97.5455	23.2998	1.88259
H962 2020_11_16 Trichrome Abby Scar 4.tif	H962	Aged	2	Scar	4	548813	8258	730800	75.0976	98.5176	23.7724	1.12999
H962 2020_11_16 Trichrome Abby Scar 6.tif	H962	Aged	2	Scar	6	548258	8324	730800	75.0216	98.5044	23.8394	1.13903
H962 2020_11_16 Trichrome Abby Scar 9.tif	H962	Aged	2	Scar	9	480363	29961	730800	65.7311	94.129	30.1691	4.09975
H962 2020_11_16 Trichrome Abby Scar 1.tif	H962	Aged	2	Scar	1	495246	11301	730800	67.7677	97.769	30.686	1.54639
H962 2020_11_16 Trichrome Abby Scar 3.tif	H962	Aged	2	Scar	3	472521	2800	730800	64.658	99.4109	34.9588	0.383142
H962 2020_11_16 Trichrome Abby Scar 2.tif	H962	Aged	2	Scar	2	417972	2773	730800	57.1938	99.3409	42.4268	0.379447
H962 2020_11_16 Trichrome Abby Scar 8.tif	H962	Aged	2	Scar	8	409565	6949	730800	56.0434	98.3316	43.0057	0.950876
F427 Slide 13 Trichrome 2019-07-23 RZ 10.tif	F427	Aged	3	RZ	1	59085	1726236	1822392	3.24217	3.30949	2.03419	94.7236
F427 Slide 13 Trichrome 2019-07-23 RZ 4.tif	F427	Aged	3	RZ	4	65975	1710286	1822392	3.62024	3.71426	2.53134	93.8484
F427 Slide 13 Trichrome 2019-07-23 RZ 1.tif	F427	Aged	3	RZ	1	68033	1700230	1822392	3.73317	3.84745	2.97022	93.2966
F427 Slide 13 Trichrome 2019-07-23 RZ 3.tif	F427	Aged	3	RZ	3	57036	1710095	1822392	3.12973	3.2276	3.03233	93.8379
F427 Slide 13 Trichrome 2019-07-23 RZ 5.tif	F427	Aged	3	RZ	5	62330	1683065	1822392	3.42023	3.57111	4.22505	92.3547
F427 Slide 13 Trichrome 2019-07-23 RZ 7.tif	F427	Aged	3	RZ	7	218865	1508436	1822392	12.0098	12.6709	5.21792	82.7723
F427 Slide 13 Trichrome 2019-07-23 RZ 2.tif	F427	Aged	3	RZ	2	105659	1606887	1822392	5.79782	6.1697	6.02757	88.1746
F427 Slide 13 Trichrome 2019-07-23 RZ 6.tif	F427	Aged	3	RZ	6	81229	1619926	1822392	4.45727	4.77493	6.65263	88.8901
F427 Slide 13 Trichrome 2019-07-23 RZ 8.tif	F427	Aged	3	RZ	8	125708	1549124	1822392	6.89797	7.50571	8.09705	85.005
F427 Slide 13 Trichrome 2019-07-23 RZ 9.tif	F427	Aged	3	RZ	9	76294	1593118	1822392	4.18648	4.57011	8.39446	87.4191
F427 Slide 13 Trichrome 2019-07-23 Scar 3.tif	F427	Aged	3	Scar	3	1235118	90972	1822392	67.7746	93.1398	27.2335	4.9919
F427 Slide 13 Trichrome 2019-07-23 Scar 1.tif	F427	Aged	3	Scar	1	1000156	316912	1822392	54.8815	75.9381	27.7286	17.3899
F427 Slide 13 Trichrome 2019-07-23 Scar 4.tif	F427	Aged	3	Scar	4	1161261	126187	1822392	63.7218	90.1987	29.3539	6.92425
F427 Slide 13 Trichrome 2019-07-23 Scar 2.tif	F427	Aged	3	Scar	2	1058441	184355	1822392	58.0798	85.1661	31.8041	10.1161
F427 Slide 13 Trichrome 2019-07-23 Scar 9.tif	F427	Aged	3	Scar	9	1008886	171969	1822392	55.3605	85.4369	35.203	9.43644
F427 Slide 13 Trichrome 2019-07-23 Scar 5.tif	F427	Aged	3	Scar	5	944162	235037	1822392	51.8089	80.0681	35.2939	12.8972
F427 Slide 13 Trichrome 2019-07-23 Scar 7.tif	F427	Aged	3	Scar	7	1015503	149360	1822392	55.7236	87.1779	36.0805	8.19582
F427 Slide 13 Trichrome 2019-07-23 Scar 10.tif	F427	Aged	3	Scar	1	939807	179290	1822392	51.57	83.979	38.5919	9.83817
F427 Slide 13 Trichrome 2019-07-23 Scar 8.tif	F427	Aged	3	Scar	8	942584	130245	1822392	51.7224	87.8597	41.1307	7.14693
F427 Slide 13 Trichrome 2019-07-23 Scar 6.tif	F427	Aged	3	Scar	6	820625	155841	1822392	45.0301	84.0403	46.4184	8.55145
R053 Slide 29 Trichrome 2019-07-23 RZ 7.tif	R053	Aged	3	RZ	7	52367	644143	730800	7.16571	7.51849	4.69212	88.1422
R053 Slide 29 Trichrome 2019-07-23 RZ 2.tif	R053	Aged	3	RZ	2	33879	660955	730800	4.63588	4.87584	4.92146	90.4427
R053 Slide 29 Trichrome 2019-07-23 RZ 8.tif	R053	Aged	3	RZ	8	31178	658661	730800	4.26628	4.51961	5.60495	90.1288
R053 Slide 29 Trichrome 2019-07-23 RZ 9.tif	R053	Aged	3	RZ	9	50086	636160	730800	6.85359	7.29855	6.09661	87.0498
R053 Slide 29 Trichrome 2019-07-23 RZ 4.tif	R053	Aged	3	RZ	4	41519	642947	730800	5.68131	6.0659	6.34018	87.9785
R053 Slide 29 Trichrome 2019-07-23 RZ 10.tif	R053	Aged	3	RZ	1	44873	637760	730800	6.14026	6.57352	6.591	87.2687
R053 Slide 29 Trichrome 2019-07-23 RZ 1.tif	R053	Aged	3	RZ	1	36584	635675	730800	5.00602	5.44195	8.01054	86.9834
R053 Slide 29 Trichrome 2019-07-23 RZ 3.tif	R053	Aged	3	RZ	3	40917	619640	730800	5.59893	6.19432	9.6118	84.7893
R053 Slide 29 Trichrome 2019-07-23 RZ 6.tif	R053	Aged	3	RZ	6	29541	628327	730800	4.04228	4.49041	9.97975	85.978
R053 Slide 29 Trichrome 2019-07-23 RZ 5.tif	R053	Aged	3	RZ	5	60429	585955	730800	8.26888	9.34878	11.5512	80.1799
R053 Slide 29 Trichrome 2019-07-23 Scar 5.tif	R053	Aged	3	Scar	5	272618	119990	730800	37.3041	69.4377	46.277	16.419
R053 Slide 29 Trichrome 2019-07-23 Scar 3.tif	R053	Aged	3	Scar	3	243187	142642	730800	33.2768	63.0297	47.2046	19.5186
R053 Slide 29 Trichrome 2019-07-23 Scar 4.tif	R053	Aged	3	Scar	4	322500	61676	730800	44.1297	83.9459	47.4308	8.43952
R053 Slide 29 Trichrome 2019-07-23 Scar 8.tif	R053	Aged	3	Scar	8	324554	42873	730800	44.4108	88.3316	49.7226	5.86658
R053 Slide 29 Trichrome 2019-07-23 Scar 9.tif	R053	Aged	3	Scar	9	322385	40277	730800	44.114	88.8941	50.3747	5.51136
R053 Slide 29 Trichrome 2019-07-23 Scar 1.tif	R053	Aged	3	Scar	1	321923	33153	730800	44.0508	90.6631	51.4127	4.53654
R053 Slide 29 Trichrome 2019-07-23 Scar 7.tif	R053	Aged	3	Scar	7	295508	42194	730800	40.4362	87.5056	53.7901	5.77367
R053 Slide 29 Trichrome 2019-07-23 Scar 10.tif	R053	Aged	3	Scar	1	246446	81597	730800	33.7228	75.1261	55.1118	11.1654
R053 Slide 29 Trichrome 2019-07-23 Scar 2.tif	R053	Aged	3	Scar	2	241655	74181	730800	33.0672	76.5128	56.7822	10.1507
R053 Slide 29 Trichrome 2019-07-23 Scar 6.tif	R053	Aged	3	Scar	6	183888	94798	730800	25.1626	65.9839	61.8656	12.9718
R485 Slide 37 Trichrome Abby RZ 4.tif	R485	Aged	3	RZ	4	2502	722734	730800	0.342365	0.344991	0.761357	98.8963
R485 Slide 37 Trichrome Abby RZ 3.tif	R485	Aged	3	RZ	3	25837	681311	730800	3.53544	3.65369	3.23645	93.2281
R485 Slide 37 Trichrome Abby RZ 7.tif	R485	Aged	3	RZ	7	41723	664237	730800	5.70922	5.91011	3.39901	90.8918
R485 Slide 37 Trichrome Abby RZ 6.tif	R485	Aged	3	RZ	6	33838	669687	730800	4.63027	4.80978	3.73221	91.6375
R485 Slide 37 Trichrome Abby RZ 5.tif	R485	Aged	3	RZ	5	28029	673658	730800	3.83539	3.99452	3.98372	92.1809
R485 Slide 37 Trichrome Abby RZ 8.tif	R485	Aged	3	RZ	8	36808	663594	730800	5.03667	5.25527	4.15955	90.8038
R485 Slide 37 Trichrome Abby RZ 1.tif	R485	Aged	3	RZ	1	41817	656575	730800	5.72209	5.98761	4.43459	89.8433
R485 Slide 37 Trichrome Abby RZ 10.tif	R485	Aged	3	RZ	1	78810	603101	730800	10.7841	11.5572	6.68979	82.5261
R485 Slide 37 Trichrome Abby RZ 2.tif	R485	Aged	3	RZ	2	79299	600554	730800	10.851	11.6641	6.9714	82.1776
R485 Slide 37 Trichrome Abby RZ 9.tif	R485	Aged	3	RZ	9	96020	579997	730800	13.139	14.2038	7.49631	79.3647
R485 Slide 37 Trichrome Abby Scar 9.tif	R485	Aged	3	Scar	9	666456	6156	730800	91.1954	99.0848	7.96223	0.842365
R485 Slide 37 Trichrome Abby Scar 3.tif	R485	Aged	3	Scar	3	656263	9884	730800	89.8006	98.5162	8.84688	1.35249
R485 Slide 37 Trichrome Abby Scar 2.tif	R485	Aged	3	Scar	2	638376	26161	730800	87.353	96.0633	9.06719	3.57978
R485 Slide 37 Trichrome Abby Scar 4.tif	R485	Aged	3	Scar	4	638247	7466	730800	87.3354	98.8438	11.643	1.02162
R485 Slide 37 Trichrome Abby Scar 8.tif	R485	Aged	3	Scar	8	615816	14929	730800	84.266	97.6331	13.6912	2.04283
R485 Slide 37 Trichrome Abby Scar 1.tif	R485	Aged	3	Scar	1	580769	49037	730800	79.4703	92.214	13.8196	6.71004
R485 Slide 37 Trichrome Abby Scar 7.tif	R485	Aged	3	Scar	7	614315	10559	730800	84.0606	98.3102	14.4945	1.44485
R485 Slide 37 Trichrome Abby Scar 5.tif	R485	Aged	3	Scar	5	589426	12738	730800	80.6549	97.8846	17.6021	1.74302
R485 Slide 37 Trichrome Abby Scar 10.tif	R485	Aged	3	Scar	1	575957	10412	730800	78.8119	98.2243	19.7634	1.42474
R485 Slide 37 Trichrome Abby Scar 6.tif	R485	Aged	3	Scar	6	542668	13597	730800	74.2567	97.5557	23.8827	1.86056
X227 LV Slide 23 Trichrome 2019_07_24 Scar 3.tif	X227	Aged	3	Scar	3	363020	69262	730800	49.6743	83.9776	40.8481	9.47756
X227 LV Slide 23 Trichrome 2019_07_24 Scar 1.tif	X227	Aged	3	Scar	1	362790	67411	730800	49.6429	84.3303	41.1329	9.22427
X227 LV Slide 23 Trichrome 2019_07_24 Scar 6.tif	X227	Aged	3	Scar	6	293660	132301	730800	40.1834	68.9406	41.7131	18.1036
X227 LV Slide 23 Trichrome 2019_07_24 Scar 7.tif	X227	Aged	3	Scar	7	342130	68640	730800	46.8158	83.2899	43.7917	9.39245
X227 LV Slide 23 Trichrome 2019_07_24 Scar 2.tif	X227	Aged	3	Scar	2	337336	71896	730800	46.1598	82.4315	44.0022	9.83799
X227 LV Slide 23 Trichrome 2019_07_24 Scar 5.tif	X227	Aged	3	Scar	5	287708	104335	730800	39.3689	73.3868	46.3543	14.2768
X227 LV Slide 23 Trichrome 2019_07_24 Scar 9.tif	X227	Aged	3	Scar	9	295096	94003	730800	40.3799	75.8409	46.7571	12.863
X227 LV Slide 23 Trichrome 2019_07_24 Scar 4.tif	X227	Aged	3	Scar	4	296052	71901	730800	40.5107	80.4592	49.6507	9.83867
X227 LV Slide 23 Trichrome 2019_07_24 Scar 10.tif	X227	Aged	3	Scar	1	266407	89124	730800	36.4542	74.9321	51.3504	12.1954
X227 LV Slide 23 Trichrome 2019_07_24 Scar 8.tif	X227	Aged	3	Scar	8	229506	70055	730800	31.4048	76.6141	59.0092	9.58607
X227_RZ_1	X227	Aged	3	RZ	1	29012	1360270	1758900	1.64944	2.08827	21.0142	77.3364
X227_RZ_2	X227	Aged	3	RZ	2	185545	1462383	1758900	10.5489	11.2593	6.30917	83.1419
X227_RZ_3	X227	Aged	3	RZ	3	134493	1286607	1758900	7.64643	9.46401	19.2052	73.1484
X227_RZ_4	X227	Aged	3	RZ	4	51284	1251885	1758900	2.91569	3.93533	25.91	71.1743
X227_RZ_5	X227	Aged	3	RZ	5	141110	1379733	1758900	8.02263	9.27841	13.5344	78.4429
B1149 LV Slide 32 Trichrome 2019_09_27 RZ 6.tif	B1149	Aged	12	RZ	6	125719	1626344	1822392	6.89857	7.17548	3.85916	89.2423
B1149 LV Slide 32 Trichrome 2019_09_27 RZ 3.tif	B1149	Aged	12	RZ	3	195242	1553145	1822392	10.7135	11.167	4.06087	85.2256
B1149 LV Slide 32 Trichrome 2019_09_27 RZ 10.tif	B1149	Aged	12	RZ	1	118520	1627364	1822392	6.50354	6.78854	4.19822	89.2982
B1149 LV Slide 32 Trichrome 2019_09_27 RZ 2.tif	B1149	Aged	12	RZ	2	183181	1560605	1822392	10.0517	10.5048	4.31334	85.635
B1149 LV Slide 32 Trichrome 2019_09_27 RZ 7.tif	B1149	Aged	12	RZ	7	166248	1576687	1822392	9.12252	9.53839	4.36004	86.5174
B1149 LV Slide 32 Trichrome 2019_09_27 RZ 4.tif	B1149	Aged	12	RZ	4	341135	1381634	1822392	18.7191	19.8016	5.46661	75.8143
B1149 LV Slide 32 Trichrome 2019_09_27 RZ 1.tif	B1149	Aged	12	RZ	1	288465	1405973	1822392	15.8289	17.0242	7.02121	77.1499
B1149 LV Slide 32 Trichrome 2019_09_27 RZ 9.tif	B1149	Aged	12	RZ	9	114684	1578323	1822392	6.29305	6.77398	7.09973	86.6072
B1149 LV Slide 32 Trichrome 2019_09_27 RZ 8.tif	B1149	Aged	12	RZ	8	99451	1581358	1822392	5.45717	5.91685	7.76907	86.7738
B1149 LV Slide 32 Trichrome 2019_09_27 RZ 5.tif	B1149	Aged	12	RZ	5	194579	1477537	1822392	10.6771	11.6367	8.24609	81.0768
B1149 LV Slide 32 Trichrome 2019_09_27 Scar 1.tif	B1149	Aged	12	Scar	1	1816675	1473	1822392	99.6863	99.919	0.232881	0.0808278
B1149 LV Slide 32 Trichrome 2019_09_27 Scar 10.tif	B1149	Aged	12	Scar	1	1811930	1340	1822392	99.4259	99.9261	0.500551	0.0735297
B1149 LV Slide 32 Trichrome 2019_09_27 Scar 4.tif	B1149	Aged	12	Scar	4	1808607	3379	1822392	99.2436	99.8135	0.571008	0.185416
B1149 LV Slide 32 Trichrome 2019_09_27 Scar 3.tif	B1149	Aged	12	Scar	3	1804524	4215	1822392	99.0195	99.767	0.74918	0.231289
B1149 LV Slide 32 Trichrome 2019_09_27 Scar 8.tif	B1149	Aged	12	Scar	8	1806167	1496	1822392	99.1097	99.9172	0.808223	0.0820899
B1149 LV Slide 32 Trichrome 2019_09_27 Scar 6.tif	B1149	Aged	12	Scar	6	1802245	5412	1822392	98.8945	99.7006	0.808553	0.296972
B1149 LV Slide 32 Trichrome 2019_09_27 Scar 5.tif	B1149	Aged	12	Scar	5	1796658	2689	1822392	98.5879	99.8506	1.26455	0.147553
B1149 LV Slide 32 Trichrome 2019_09_27 Scar 2.tif	B1149	Aged	12	Scar	2	1797968	983	1822392	98.6598	99.9454	1.28628	0.0539401
B1149 LV Slide 32 Trichrome 2019_09_27 Scar 7.tif	B1149	Aged	12	Scar	7	1793866	2114	1822392	98.4347	99.8823	1.4493	0.116001
B1149 LV Slide 32 Trichrome 2019_09_27 Scar 9.tif	B1149	Aged	12	Scar	9	1778052	15476	1822392	97.5669	99.1371	1.58385	0.849214
F894 Slide 36 Trichrome 2019-07-23 RZ 4.tif	F894	Aged	12	RZ	4	54393	1730614	1822392	2.9847	3.04721	2.05142	94.9639
F894 Slide 36 Trichrome 2019-07-23 RZ 7.tif	F894	Aged	12	RZ	7	42341	1723230	1822392	2.32337	2.39815	3.11794	94.5587
F894 Slide 36 Trichrome 2019-07-23 RZ 3.tif	F894	Aged	12	RZ	3	109716	1652311	1822392	6.02044	6.22669	3.3124	90.6672
F894 Slide 36 Trichrome 2019-07-23 RZ 10.tif	F894	Aged	12	RZ	1	88885	1662420	1822392	4.87738	5.07536	3.90075	91.2219
F894 Slide 36 Trichrome 2019-07-23 RZ 5.tif	F894	Aged	12	RZ	5	194566	1550955	1822392	10.6764	11.1466	4.21814	85.1055
F894 Slide 36 Trichrome 2019-07-23 RZ 8.tif	F894	Aged	12	RZ	8	67268	1654644	1822392	3.69119	3.90659	5.51363	90.7952
F894 Slide 36 Trichrome 2019-07-23 RZ 2.tif	F894	Aged	12	RZ	2	29290	1688791	1822392	1.60723	1.70481	5.72385	92.6689
F894 Slide 36 Trichrome 2019-07-23 RZ 1.tif	F894	Aged	12	RZ	1	174170	1512317	1822392	9.55722	10.3274	7.45751	82.9853
F894 Slide 36 Trichrome 2019-07-23 RZ 6.tif	F894	Aged	12	RZ	6	173652	1465228	1822392	9.5288	10.5958	10.0698	80.4014
F894 Slide 36 Trichrome 2019-07-23 RZ 9.tif	F894	Aged	12	RZ	9	217586	1401524	1822392	11.9396	13.4386	11.1547	76.9057
F894 Slide 36 Trichrome 2019-07-23 Scar 10.tif	F894	Aged	12	Scar	1	1749548	18589	1822392	96.0028	98.9487	2.97713	1.02003
F894 Slide 36 Trichrome 2019-07-23 Scar 5.tif	F894	Aged	12	Scar	5	1635051	40946	1822392	89.72	97.5569	8.03312	2.24683
F894 Slide 36 Trichrome 2019-07-23 Scar 7.tif	F894	Aged	12	Scar	7	1546059	61949	1822392	84.8368	96.1475	11.7639	3.39932
F894 Slide 36 Trichrome 2019-07-23 Scar 1.tif	F894	Aged	12	Scar	1	1564568	36758	1822392	85.8524	97.7045	12.1305	2.01702
F894 Slide 36 Trichrome 2019-07-23 Scar 4.tif	F894	Aged	12	Scar	4	1558704	24905	1822392	85.5307	98.4273	13.1027	1.36661
F894 Slide 36 Trichrome 2019-07-23 Scar 6.tif	F894	Aged	12	Scar	6	1435679	129577	1822392	78.7799	91.7217	14.1098	7.11027
F894 Slide 36 Trichrome 2019-07-23 Scar 2.tif	F894	Aged	12	Scar	2	1355880	94780	1822392	74.4011	93.4664	20.398	5.20086
F894 Slide 36 Trichrome 2019-07-23 Scar 9.tif	F894	Aged	12	Scar	9	1308300	100208	1822392	71.7903	92.8855	22.711	5.49871
F894 Slide 36 Trichrome 2019-07-23 Scar 3.tif	F894	Aged	12	Scar	3	1062228	63989	1822392	58.2876	94.3182	38.2012	3.51126
F894 Slide 36 Trichrome 2019-07-23 Scar 8.tif	F894	Aged	12	Scar	8	628037	141024	1822392	34.4622	81.6628	57.7994	7.7384
F985 LV Trichrome 2021_04_14 Scar 1	F985	Aged	12	Scar	1	721483	637878	1616472	44.6332	53.0752	15.9057	39.4611
F985 LV Trichrome 2021_04_14 Scar 2	F985	Aged	12	Scar	2	623480	731281	1616472	38.5704	46.0214	16.1903	45.2393
F985 LV Trichrome 2021_04_14 Scar 3	F985	Aged	12	Scar	3	680778	567715	1616472	42.1151	54.528	22.7643	35.1206
F985 LV Trichrome 2021_04_14 Scar 4	F985	Aged	12	Scar	4	785910	433601	1616472	48.6188	64.4447	24.5572	26.8239
F985 LV Trichrome 2021_04_14 Scar 5	F985	Aged	12	Scar	5	681530	381289	1616472	42.1616	64.1247	34.2507	23.5877
F985 LV Trichrome 2021_04_14 Scar 6	F985	Aged	12	Scar	6	722628	276897	1616472	44.704	72.2971	38.1663	17.1297
F985 LV Trichrome 2021_04_14 Scar 7	F985	Aged	12	Scar	7	754436	524142	1616472	46.6718	59.0059	20.9032	32.4251
F985 LV Trichrome 2021_04_14 RZ 1	F985	Aged	12	RZ	1	175822	1144357	1616472	10.8769	13.318	18.3296	70.7935
F985 LV Trichrome 2021_04_14 RZ 2	F985	Aged	12	RZ	2	90169	1302413	1616472	5.57814	6.47495	13.8505	80.5713
F985 LV Trichrome 2021_04_14 RZ 3	F985	Aged	12	RZ	3	120682	1154991	1616472	7.46576	9.46026	21.0829	71.4513
F985 LV Trichrome 2021_04_14 RZ 4	F985	Aged	12	RZ	4	116981	1160651	1616472	7.23681	9.15608	20.9617	71.8015
F985 LV Trichrome 2021_04_14 RZ 5	F985	Aged	12	RZ	5	68020	1215749	1616472	4.20793	5.29846	20.582	75.21
F985 LV Trichrome 2021_04_14 RZ 6	F985	Aged	12	RZ	6	154019	1159629	1616472	9.5281	11.7245	18.7336	71.7383
F985 LV Trichrome 2021_04_14 RZ 7	F985	Aged	12	RZ	7	129915	1114351	1616472	8.03695	10.4411	23.0258	68.9372
F985 LV Trichrome 2021_04_14 RZ 8	F985	Aged	12	RZ	8	106255	1142620	1616472	6.57327	8.50806	22.7407	70.686
F985 LV Trichrome 2021_04_14 RZ 9	F985	Aged	12	RZ	9	142393	1127792	1616472	8.80888	11.2104	21.4224	69.7687
F985 LV Trichrome 2021_04_14 RZ 10	F985	Aged	12	RZ	10	104251	1222138	1616472	6.44929	7.85976	17.9454	75.6053
S1165 LV Slide 2 Trichrome 2019_07_24 RZ 5.tif	S1165	Aged	12	RZ	5	20863	685790	730800	2.85482	2.95237	3.30419	93.841
S1165 LV Slide 2 Trichrome 2019_07_24 RZ 4.tif	S1165	Aged	12	RZ	4	13461	691041	730800	1.84195	1.91071	3.59852	94.5595
S1165 LV Slide 2 Trichrome 2019_07_24 RZ 10.tif	S1165	Aged	12	RZ	1	11231	692976	730800	1.53681	1.59484	3.63889	94.8243
S1165 LV Slide 2 Trichrome 2019_07_24 RZ 1.tif	S1165	Aged	12	RZ	1	66896	628212	730800	9.1538	9.62383	4.88396	85.9622
S1165 LV Slide 2 Trichrome 2019_07_24 RZ 3.tif	S1165	Aged	12	RZ	3	22846	671434	730800	3.12616	3.2906	4.99726	91.8766
S1165 LV Slide 2 Trichrome 2019_07_24 RZ 9.tif	S1165	Aged	12	RZ	9	29206	655847	730800	3.99644	4.26332	6.25985	89.7437
S1165 LV Slide 2 Trichrome 2019_07_24 RZ 6.tif	S1165	Aged	12	RZ	6	34620	648742	730800	4.73727	5.06613	6.49124	88.7715
S1165 LV Slide 2 Trichrome 2019_07_24 RZ 2.tif	S1165	Aged	12	RZ	2	60590	622339	730800	8.29091	8.87208	6.55049	85.1586
S1165 LV Slide 2 Trichrome 2019_07_24 RZ 8.tif	S1165	Aged	12	RZ	8	99362	544867	730800	13.5963	15.4234	11.8461	74.5576
S1165 LV Slide 2 Trichrome 2019_07_24 RZ 7.tif	S1165	Aged	12	RZ	7	136613	501014	730800	18.6936	21.4252	12.7495	68.5569
S1165 LV Slide 2 Trichrome 2019_07_24 Scar 10.tif	S1165	Aged	12	Scar	1	651244	34705	730800	89.1138	94.9406	6.13725	4.74891
S1165 LV Slide 2 Trichrome 2019_07_24 Scar 4.tif	S1165	Aged	12	Scar	4	654622	29054	730800	89.5761	95.7503	6.44828	3.97564
S1165 LV Slide 2 Trichrome 2019_07_24 Scar 9.tif	S1165	Aged	12	Scar	9	652170	26985	730800	89.2406	96.0267	7.06691	3.69253
S1165 LV Slide 2 Trichrome 2019_07_24 Scar 2.tif	S1165	Aged	12	Scar	2	644597	28508	730800	88.2043	95.7647	7.89477	3.90093
S1165 LV Slide 2 Trichrome 2019_07_24 Scar 3.tif	S1165	Aged	12	Scar	3	644597	28508	730800	88.2043	95.7647	7.89477	3.90093
S1165 LV Slide 2 Trichrome 2019_07_24 Scar 6.tif	S1165	Aged	12	Scar	6	591303	54323	730800	80.9117	91.586	11.6549	7.43336
S1165 LV Slide 2 Trichrome 2019_07_24 Scar 1.tif	S1165	Aged	12	Scar	1	582015	40748	730800	79.6408	93.4569	14.7834	5.57581
S1165 LV Slide 2 Trichrome 2019_07_24 Scar 5.tif	S1165	Aged	12	Scar	5	543091	56588	730800	74.3146	90.5636	17.9421	7.7433
S1165 LV Slide 2 Trichrome 2019_07_24 Scar 8.tif	S1165	Aged	12	Scar	8	552086	33803	730800	75.5454	94.2305	19.8291	4.62548
S1165 LV Slide 2 Trichrome 2019_07_24 Scar 7.tif	S1165	Aged	12	Scar	7	462516	113355	730800	63.289	80.3159	21.1999	15.5111
5001 Slide 12 Trichrome 2020_12_10 RZ 10.tif	5001	Young	1	RZ	1	10940	1696785	1822392	0.60031	0.640618	6.29211	93.1076
5001 Slide 12 Trichrome 2020_12_10 RZ 4.tif	5001	Young	1	RZ	4	27215	1672658	1822392	1.49337	1.601	6.72298	91.7837
5001 Slide 12 Trichrome 2020_12_10 RZ 1.tif	5001	Young	1	RZ	1	18728	1679604	1822392	1.02766	1.10273	6.80754	92.1648
5001 Slide 12 Trichrome 2020_12_10 RZ 5.tif	5001	Young	1	RZ	5	23645	1670597	1822392	1.29747	1.39561	7.03197	91.6706
5001 Slide 12 Trichrome 2020_12_10 RZ 2.tif	5001	Young	1	RZ	2	10883	1681006	1822392	0.597182	0.643246	7.16108	92.2417
5001 Slide 12 Trichrome 2020_12_10 RZ 8.tif	5001	Young	1	RZ	8	18860	1649356	1822392	1.0349	1.13055	8.46009	90.505
5001 Slide 12 Trichrome 2020_12_10 RZ 3.tif	5001	Young	1	RZ	3	18381	1645652	1822392	1.00862	1.10461	8.68962	90.3018
5001 Slide 12 Trichrome 2020_12_10 RZ 6.tif	5001	Young	1	RZ	6	38495	1621662	1822392	2.11233	2.31876	8.90231	88.9854
5001 Slide 12 Trichrome 2020_12_10 RZ 9.tif	5001	Young	1	RZ	9	29959	1628995	1822392	1.64394	1.8059	8.96832	89.3877
5001 Slide 12 Trichrome 2020_12_10 RZ 7.tif	5001	Young	1	RZ	7	82689	1546469	1822392	4.53739	5.07557	10.6033	84.8593
5001 Slide 12 Trichrome 2020_12_10 Scar 2.tif	5001	Young	1	Scar	2	1151134	57253	1822392	63.1661	95.262	33.6923	3.14164
5001 Slide 12 Trichrome 2020_12_10 Scar 5.tif	5001	Young	1	Scar	5	1026365	133479	1822392	56.3197	88.4916	36.356	7.32438
5001 Slide 12 Trichrome 2020_12_10 Scar 1.tif	5001	Young	1	Scar	1	912205	172648	1822392	50.0554	84.0856	40.4709	9.4737
5001 Slide 12 Trichrome 2020_12_10 Scar 6.tif	5001	Young	1	Scar	6	919975	159975	1822392	50.4817	85.1868	40.74	8.7783
5001 Slide 12 Trichrome 2020_12_10 Scar 4.tif	5001	Young	1	Scar	4	1006219	69815	1822392	55.2142	93.5118	40.9549	3.83095
5001 Slide 12 Trichrome 2020_12_10 Scar 3.tif	5001	Young	1	Scar	3	912954	88827	1822392	50.0965	91.1331	45.0293	4.8742
5001 Slide 12 Trichrome 2020_12_10 Scar 8.tif	5001	Young	1	Scar	8	835811	130723	1822392	45.8634	86.4751	46.9634	7.17315
5001 Slide 12 Trichrome 2020_12_10 Scar 7.tif	5001	Young	1	Scar	7	846232	118392	1822392	46.4352	87.7266	47.0682	6.49652
5001 Slide 12 Trichrome 2020_12_10 Scar 9.tif	5001	Young	1	Scar	9	784008	146719	1822392	43.0208	84.2361	48.9283	8.0509
5001 Slide 12 Trichrome 2020_12_10 Scar 10.tif	5001	Young	1	Scar	1	756329	117028	1822392	41.502	86.6002	52.0763	6.42167
D212 Slide 2 Trichrome 2020_07_01 RZ 8.tif	D212	Young	1	RZ	8	74766	1644704	1822392	4.10263	4.3482	5.64763	90.2497
D212 Slide 2 Trichrome 2020_07_01 RZ 1.tif	D212	Young	1	RZ	1	106172	1612355	1822392	5.82597	6.17808	5.69938	88.4747
D212 Slide 2 Trichrome 2020_07_01 RZ 2.tif	D212	Young	1	RZ	2	100171	1617180	1822392	5.49668	5.83288	5.76391	88.7394
D212 Slide 2 Trichrome 2020_07_01 RZ 5.tif	D212	Young	1	RZ	5	97630	1617675	1822392	5.35724	5.6917	5.87618	88.7666
D212 Slide 2 Trichrome 2020_07_01 RZ 3.tif	D212	Young	1	RZ	3	102650	1604897	1822392	5.63271	6.01155	6.30188	88.0654
D212 Slide 2 Trichrome 2020_07_01 RZ 4.tif	D212	Young	1	RZ	4	41964	1658669	1822392	2.30269	2.46755	6.68127	91.016
D212 Slide 2 Trichrome 2020_07_01 RZ 7.tif	D212	Young	1	RZ	7	95823	1598378	1822392	5.25809	5.65594	7.03422	87.7077
D212 Slide 2 Trichrome 2020_07_01 RZ 9.tif	D212	Young	1	RZ	9	85063	1597957	1822392	4.66766	5.05419	7.64775	87.6846
D212 Slide 2 Trichrome 2020_07_01 RZ 10.tif	D212	Young	1	RZ	1	93181	1580483	1822392	5.11312	5.56749	8.16114	86.7257
D212 Slide 2 Trichrome 2020_07_01 RZ 6.tif	D212	Young	1	RZ	6	72041	1594678	1822392	3.9531	4.32232	8.54223	87.5047
D212 Slide 2 Trichrome 2020_07_01 Scar 3.tif	D212	Young	1	Scar	3	1193940	110400	1822392	65.515	91.5359	28.427	6.05797
D212 Slide 2 Trichrome 2020_07_01 Scar 1.tif	D212	Young	1	Scar	1	1042053	195206	1822392	57.1805	84.2227	32.108	10.7115
D212 Slide 2 Trichrome 2020_07_01 Scar 4.tif	D212	Young	1	Scar	4	1093561	101697	1822392	60.0069	91.4916	34.4127	5.58041
D212 Slide 2 Trichrome 2020_07_01 Scar 2.tif	D212	Young	1	Scar	2	1067202	105199	1822392	58.5605	91.027	35.6669	5.77258
D212 Slide 2 Trichrome 2020_07_01 Scar 7.tif	D212	Young	1	Scar	7	1012969	149909	1822392	55.5846	87.1088	36.1895	8.22595
D212 Slide 2 Trichrome 2020_07_01 Scar 10.tif	D212	Young	1	Scar	1	1056821	102514	1822392	57.9909	91.1575	36.3839	5.62524
D212 Slide 2 Trichrome 2020_07_01 Scar 8.tif	D212	Young	1	Scar	8	1013347	138073	1822392	55.6053	88.0085	36.8182	7.57647
D212 Slide 2 Trichrome 2020_07_01 Scar 9.tif	D212	Young	1	Scar	9	996450	147514	1822392	54.6781	87.105	37.2273	8.09453
D212 Slide 2 Trichrome 2020_07_01 Scar 5.tif	D212	Young	1	Scar	5	960952	106658	1822392	52.7303	90.0096	41.4171	5.85264
D212 Slide 2 Trichrome 2020_07_01 Scar 6.tif	D212	Young	1	Scar	6	895011	63205	1822392	49.1119	93.4039	47.4199	3.46824
D216_Scar_1	D216	Young	1	Scar	1	645345	138556	1616472	39.9231	82.3248	51.5054	8.57151
D216_Scar_2	D216	Young	1	Scar	2	1441932	14657	1616472	89.2024	98.9937	9.89086	0.906728
D216_Scar_3	D216	Young	1	Scar	3	1571751	10582	1616472	97.2334	99.3312	2.11195	0.654636
D216_Scar_4	D216	Young	1	Scar	4	615619	176507	1616472	38.0841	77.7173	50.9966	10.9193
D216_Scar_5	D216	Young	1	Scar	5	233812	563781	1616472	14.4643	29.3147	50.6584	34.8773
D216_Scar_6	D216	Young	1	Scar	6	497820	12278	1616472	30.7967	97.593	68.4437	0.759555
D216_Scar_7	D216	Young	1	Scar	7	388654	39540	1616472	24.0433	90.7659	73.5106	2.44607
D216_Scar_8	D216	Young	1	Scar	8	563748	10569	1616472	34.8752	98.1597	64.471	0.653831
D216_RZ_1	D216	Young	1	RZ	1	8882	1583922	1616472	0.549468	0.557633	1.46418	97.9864
D216_RZ_2	D216	Young	1	RZ	2	75071	1155419	1616472	4.64413	6.1009	23.8781	71.4778
D216_RZ_3	D216	Young	1	RZ	3	7558	1644665	1616472	0.467561	0.457444	-2.21167	101.744
D216_RZ_4	D216	Young	1	RZ	4	6475	1526650	1616472	0.400564	0.42234	5.15611	94.4433
D216_RZ_5	D216	Young	1	RZ	5	11591	1535587	1616472	0.717055	0.74917	4.28674	94.9962
X103 LV Slide 15 Trichrome 2019_07_24 RZ 1.tif	X103	Young	1	RZ	1	25236	687452	730800	3.4532	3.54096	2.47838	94.0684
X103 LV Slide 15 Trichrome 2019_07_24 RZ 2.tif	X103	Young	1	RZ	2	6662	698190	730800	0.911604	0.945163	3.55063	95.5378
X103 LV Slide 15 Trichrome 2019_07_24 RZ 7.tif	X103	Young	1	RZ	7	13029	678916	730800	1.78284	1.88295	5.31678	92.9004
X103 LV Slide 15 Trichrome 2019_07_24 RZ 4.tif	X103	Young	1	RZ	4	18719	669768	730800	2.56144	2.71886	5.78996	91.6486
X103 LV Slide 15 Trichrome 2019_07_24 RZ 6.tif	X103	Young	1	RZ	6	15033	670625	730800	2.05706	2.19249	6.17707	91.7659
X103 LV Slide 15 Trichrome 2019_07_24 RZ 3.tif	X103	Young	1	RZ	3	17358	667975	730800	2.37521	2.53278	6.22154	91.4033
X103 LV Slide 15 Trichrome 2019_07_24 RZ 10.tif	X103	Young	1	RZ	1	18575	655332	730800	2.54174	2.75632	7.78503	89.6732
X103 LV Slide 15 Trichrome 2019_07_24 RZ 8.tif	X103	Young	1	RZ	8	16504	655360	730800	2.25835	2.45645	8.06459	89.6771
X103 LV Slide 15 Trichrome 2019_07_24 RZ 9.tif	X103	Young	1	RZ	9	16061	646956	730800	2.19773	2.42241	9.27518	88.5271
X103 LV Slide 15 Trichrome 2019_07_24 RZ 5.tif	X103	Young	1	RZ	5	15675	639859	730800	2.14491	2.39118	10.2991	87.556
X103 LV Slide 15 Trichrome 2019_07_24 Scar 4.tif	X103	Young	1	Scar	4	480352	115456	730800	65.7296	80.6219	18.4718	15.7986
X103 LV Slide 15 Trichrome 2019_07_24 Scar 2.tif	X103	Young	1	Scar	2	481494	104199	730800	65.8859	82.2093	19.8559	14.2582
X103 LV Slide 15 Trichrome 2019_07_24 Scar 5.tif	X103	Young	1	Scar	5	453628	104824	730800	62.0728	81.2295	23.5835	14.3437
X103 LV Slide 15 Trichrome 2019_07_24 Scar 10.tif	X103	Young	1	Scar	1	363077	188461	730800	49.6821	65.8299	24.5296	25.7883
X103 LV Slide 15 Trichrome 2019_07_24 Scar 3.tif	X103	Young	1	Scar	3	417110	121933	730800	57.0758	77.3797	26.2393	16.6849
X103 LV Slide 15 Trichrome 2019_07_24 Scar 6.tif	X103	Young	1	Scar	6	376757	148810	730800	51.5541	71.6858	28.0833	20.3626
X103 LV Slide 15 Trichrome 2019_07_24 Scar 9.tif	X103	Young	1	Scar	9	382034	136845	730800	52.2761	73.6268	28.9985	18.7254
X103 LV Slide 15 Trichrome 2019_07_24 Scar 1.tif	X103	Young	1	Scar	1	353197	154089	730800	48.3302	69.6248	30.5848	21.085
X103 LV Slide 15 Trichrome 2019_07_24 Scar 7.tif	X103	Young	1	Scar	7	217280	223359	730800	29.7318	49.3102	39.7046	30.5636
X103 LV Slide 15 Trichrome 2019_07_24 Scar 8.tif	X103	Young	1	Scar	8	232683	166055	730800	31.8395	58.3549	45.4381	22.7224
5043 LV Trichrome 2021_04_14 (2) Scar 1	5043	Young	2	Scar	1	755013	440276	1616472	46.7075	63.1657	26.0557	27.2368
5043 LV Trichrome 2021_04_14 (2) Scar 2	5043	Young	2	Scar	2	685860	485524	1616472	42.4294	58.5513	27.5345	30.036
5043 LV Trichrome 2021_04_14 (2) Scar 3	5043	Young	2	Scar	3	762534	535294	1616472	47.1727	58.7546	19.7123	33.115
5043 LV Trichrome 2021_04_14 (2) Scar 4	5043	Young	2	Scar	4	776800	579306	1616472	48.0553	57.2817	16.1071	35.8377
5043 LV Trichrome 2021_04_14 (2) Scar 5	5043	Young	2	Scar	5	710626	524314	1616472	43.9615	57.5434	23.6028	32.4357
5043 LV Trichrome 2021_04_14 (2) Scar 6	5043	Young	2	Scar	6	522113	690065	1616472	32.2995	43.0723	25.0109	42.6896
5043 LV Trichrome 2021_04_14 (2) Scar 7	5043	Young	2	Scar	7	642513	705518	1616472	39.7479	47.6631	16.6066	43.6455
5043 LV Trichrome 2021_04_14 (2) Scar 8	5043	Young	2	Scar	8	682782	685447	1616472	42.239	49.9026	15.3571	42.4039
5043 LV Trichrome 2021_04_14 (2) Scar 9	5043	Young	2	Scar	9	521660	754670	1616472	32.2715	40.8719	21.0422	46.6862
5043 LV Trichrome 2021_04_14 (2) Scar 10	5043	Young	2	Scar	10	636874	532498	1616472	39.399	54.4629	27.659	32.942
5043 LV Trichrome 2021_04_14 (2) RZ 1	5043	Young	2	RZ	1	58918	1169748	1616472	3.64485	4.79528	23.9909	72.3643
5043 LV Trichrome 2021_04_14 (2) RZ 2	5043	Young	2	RZ	2	39149	1247911	1616472	2.42188	3.04174	20.3785	77.1997
5043 LV Trichrome 2021_04_14 (2) RZ 3	5043	Young	2	RZ	3	50285	1126910	1616472	3.11079	4.27159	27.175	69.7142
5043 LV Trichrome 2021_04_14 (2) RZ 4	5043	Young	2	RZ	4	24799	1178321	1616472	1.53414	2.06122	25.5712	72.8946
5043 LV Trichrome 2021_04_14 (2) RZ 5	5043	Young	2	RZ	5	47527	1175237	1616472	2.94017	3.88685	24.356	72.7038
5043 LV Trichrome 2021_04_14 (2) RZ 6	5043	Young	2	RZ	6	46573	1198309	1616472	2.88115	3.74116	22.9877	74.1311
5043 LV Trichrome 2021_04_14 (2) RZ 7	5043	Young	2	RZ	7	56983	1131642	1616472	3.52515	4.79403	26.4679	70.0069
5043 LV Trichrome 2021_04_14 (2) RZ 8	5043	Young	2	RZ	8	37481	1238039	1616472	2.31869	2.93849	21.0924	76.589
5043 LV Trichrome 2021_04_14 (2) RZ 9	5043	Young	2	RZ	9	53820	1131117	1616472	3.32947	4.54201	26.6961	69.9744
5043 LV Trichrome 2021_04_14 (2) RZ 10	5043	Young	2	RZ	10	49235	1172473	1616472	3.04583	4.03001	24.4213	72.5328
D218 Trichrome Slide 12 2018_05_17 RZ 4.tif	D218	Young	2	RZ	4	113424	1173659	1822392	6.22391	8.81249	29.374	64.4021
D218 Trichrome Slide 12 2018_05_17 RZ 2.tif	D218	Young	2	RZ	2	214385	1057373	1822392	11.7639	16.8574	30.2149	58.0212
D218 Trichrome Slide 12 2018_05_17 RZ 1.tif	D218	Young	2	RZ	1	137355	1077425	1822392	7.53707	11.307	33.3415	59.1215
D218 Trichrome Slide 12 2018_05_17 RZ 5.tif	D218	Young	2	RZ	5	105306	1106192	1822392	5.77845	8.69221	33.5215	60.7
D218 Trichrome Slide 12 2018_05_17 RZ 8.tif	D218	Young	2	RZ	8	166399	1007420	1822392	9.1308	14.1759	35.5891	55.2801
D218 Trichrome Slide 12 2018_05_17 RZ 7.tif	D218	Young	2	RZ	7	207431	965710	1822392	11.3823	17.6817	35.6263	52.9913
D218 Trichrome Slide 12 2018_05_17 RZ 6.tif	D218	Young	2	RZ	6	124993	1045840	1822392	6.85873	10.6756	35.753	57.3883
D218 Trichrome Slide 12 2018_05_17 RZ 3.tif	D218	Young	2	RZ	3	172841	975241	1822392	9.48429	15.0548	37.0014	53.5143
D218 Trichrome Slide 12 2018_05_17 RZ 9.tif	D218	Young	2	RZ	9	155454	945373	1822392	8.53022	14.1216	39.5944	51.8754
D218 Trichrome Slide 12 2018_05_17 RZ 10.tif	D218	Young	2	RZ	1	155310	924962	1822392	8.52232	14.3769	40.7223	50.7554
D218 Trichrome Slide 12 2018_05_17 Scar 2.tif	D218	Young	2	Scar	2	1819701	2	1822392	99.8523	99.9999	0.147553	0.000109746
D218 Trichrome Slide 12 2018_05_17 Scar 8.tif	D218	Young	2	Scar	8	1816949	0	1822392	99.7013	100	0.298673	0
D218 Trichrome Slide 12 2018_05_17 Scar 3.tif	D218	Young	2	Scar	3	1801391	0	1822392	98.8476	100	1.15239	0
D218 Trichrome Slide 12 2018_05_17 Scar 1.tif	D218	Young	2	Scar	1	1798235	0	1822392	98.6744	100	1.32557	0
D218 Trichrome Slide 12 2018_05_17 Scar 5.tif	D218	Young	2	Scar	5	1785945	0	1822392	98	100	1.99995	0
D218 Trichrome Slide 12 2018_05_17 Scar 7.tif	D218	Young	2	Scar	7	1765618	0	1822392	96.8846	100	3.11536	0
D218 Trichrome Slide 12 2018_05_17 Scar 4.tif	D218	Young	2	Scar	4	1764405	0	1822392	96.8181	100	3.18192	0
D218 Trichrome Slide 12 2018_05_17 Scar 10.tif	D218	Young	2	Scar	1	1741194	227	1822392	95.5444	99.987	4.44312	0.0124562
D218 Trichrome Slide 12 2018_05_17 Scar 6.tif	D218	Young	2	Scar	6	1741302	1	1822392	95.5504	99.9999	4.44959	5.48729e-05
D218 Trichrome Slide 12 2018_05_17 Scar 9.tif	D218	Young	2	Scar	9	1599987	14099	1822392	87.796	99.1265	11.4304	0.773654
X115 Slide 1 Trichrome 2020_07_01 RZ 8.tif	X115	Young	2	RZ	8	3788	715098	730800	0.518336	0.526926	1.63027	97.8514
X115 Slide 1 Trichrome 2020_07_01 RZ 3.tif	X115	Young	2	RZ	3	5319	704143	730800	0.727833	0.749723	2.91981	96.3524
X115 Slide 1 Trichrome 2020_07_01 RZ 7.tif	X115	Young	2	RZ	7	8888	690294	730800	1.2162	1.2712	4.32649	94.4573
X115 Slide 1 Trichrome 2020_07_01 RZ 4.tif	X115	Young	2	RZ	4	10355	688597	730800	1.41694	1.4815	4.35796	94.2251
X115 Slide 1 Trichrome 2020_07_01 RZ 2.tif	X115	Young	2	RZ	2	23450	669351	730800	3.20881	3.38481	5.19964	91.5915
X115 Slide 1 Trichrome 2020_07_01 RZ 6.tif	X115	Young	2	RZ	6	15910	672460	730800	2.17707	2.31126	5.80597	92.017
X115 Slide 1 Trichrome 2020_07_01 RZ 5.tif	X115	Young	2	RZ	5	9694	672841	730800	1.32649	1.42029	6.60441	92.0691
X115 Slide 1 Trichrome 2020_07_01 RZ 9.tif	X115	Young	2	RZ	9	23054	647292	730800	3.15463	3.43912	8.2723	88.5731
X115 Slide 1 Trichrome 2020_07_01 RZ 1.tif	X115	Young	2	RZ	1	44821	616363	730800	6.13314	6.7789	9.526	84.3409
X115 Slide 1 Trichrome 2020_07_01 RZ 10.tif	X115	Young	2	RZ	1	24483	630846	730800	3.35016	3.73599	10.3272	86.3227
X115 Slide 1 Trichrome 2020_07_01 Scar 2.tif	X115	Young	2	Scar	2	596589	32302	730800	81.6351	94.8637	13.9449	4.42009
X115 Slide 1 Trichrome 2020_07_01 Scar 7.tif	X115	Young	2	Scar	7	595385	29258	730800	81.4703	95.316	14.5261	4.00356
X115 Slide 1 Trichrome 2020_07_01 Scar 9.tif	X115	Young	2	Scar	9	581834	30238	730800	79.616	95.0597	16.2463	4.13766
X115 Slide 1 Trichrome 2020_07_01 Scar 5.tif	X115	Young	2	Scar	5	543374	57620	730800	74.3533	90.4125	17.7622	7.88451
X115 Slide 1 Trichrome 2020_07_01 Scar 8.tif	X115	Young	2	Scar	8	558904	28180	730800	76.4784	95.2	19.6656	3.85605
X115 Slide 1 Trichrome 2020_07_01 Scar 6.tif	X115	Young	2	Scar	6	532486	51268	730800	72.8634	91.2175	20.1212	7.01533
X115 Slide 1 Trichrome 2020_07_01 Scar 10.tif	X115	Young	2	Scar	1	503269	46962	730800	68.8655	91.465	24.7084	6.42611
X115 Slide 1 Trichrome 2020_07_01 Scar 1.tif	X115	Young	2	Scar	1	453322	66398	730800	62.0309	87.2243	28.8834	9.08566
X115 Slide 1 Trichrome 2020_07_01 Scar 4.tif	X115	Young	2	Scar	4	472817	43300	730800	64.6985	91.6104	29.3764	5.92501
X115 Slide 1 Trichrome 2020_07_01 Scar 3.tif	X115	Young	2	Scar	3	434987	53102	730800	59.522	89.1204	33.2117	7.26628
X245 Trichrome Slide 27 2018_05_24 RZ 10.tif	X245	Young	2	RZ	1	16544	678467	730800	2.26382	2.38039	4.89724	92.8389
X245 Trichrome Slide 27 2018_05_24 RZ 5.tif	X245	Young	2	RZ	5	28559	602548	730800	3.90791	4.52522	13.6416	82.4505
X245 Trichrome Slide 27 2018_05_24 RZ 6.tif	X245	Young	2	RZ	6	15099	614414	730800	2.06609	2.39852	13.8597	84.0742
X245 Trichrome Slide 27 2018_05_24 RZ 9.tif	X245	Young	2	RZ	9	24166	583795	730800	3.30679	3.97493	16.8088	79.8844
X245 Trichrome Slide 27 2018_05_24 RZ 4.tif	X245	Young	2	RZ	4	47144	559391	730800	6.45101	7.77268	17.004	76.545
X245 Trichrome Slide 27 2018_05_24 RZ 7.tif	X245	Young	2	RZ	7	25341	567136	730800	3.46757	4.27713	18.9276	77.6048
X245 Trichrome Slide 27 2018_05_24 RZ 3.tif	X245	Young	2	RZ	3	17268	523624	730800	2.36289	3.1925	25.9863	71.6508
X245 Trichrome Slide 27 2018_05_24 RZ 2.tif	X245	Young	2	RZ	2	42608	494913	730800	5.83032	7.92676	26.4476	67.7221
X245 Trichrome Slide 27 2018_05_24 RZ 8.tif	X245	Young	2	RZ	8	28140	509263	730800	3.85057	5.23629	26.4637	69.6857
X245 Trichrome Slide 27 2018_05_24 RZ 1.tif	X245	Young	2	RZ	1	84891	374128	730800	11.6162	18.494	37.1895	51.1943
X245 Trichrome Slide 27 2018_05_24 Scar 7.tif	X245	Young	2	Scar	7	720319	180	730800	98.5658	99.975	1.40955	0.0246305
X245 Trichrome Slide 27 2018_05_24 Scar 2.tif	X245	Young	2	Scar	2	717828	514	730800	98.225	99.9284	1.70471	0.0703339
X245 Trichrome Slide 27 2018_05_24 Scar 5.tif	X245	Young	2	Scar	5	715520	1418	730800	97.9091	99.8022	1.89683	0.194034
X245 Trichrome Slide 27 2018_05_24 Scar 10.tif	X245	Young	2	Scar	1	714863	1265	730800	97.8192	99.8234	2.00766	0.173098
X245 Trichrome Slide 27 2018_05_24 Scar 3.tif	X245	Young	2	Scar	3	708147	1034	730800	96.9002	99.8542	2.95826	0.141489
X245 Trichrome Slide 27 2018_05_24 Scar 1.tif	X245	Young	2	Scar	1	700836	1742	730800	95.8998	99.7521	3.8618	0.238369
X245 Trichrome Slide 27 2018_05_24 Scar 6.tif	X245	Young	2	Scar	6	697851	1902	730800	95.4914	99.7282	4.24836	0.260263
X245 Trichrome Slide 27 2018_05_24 Scar 4.tif	X245	Young	2	Scar	4	691209	3302	730800	94.5825	99.5246	4.96565	0.451834
X245 Trichrome Slide 27 2018_05_24 Scar 8.tif	X245	Young	2	Scar	8	690842	2248	730800	94.5323	99.6757	5.1601	0.307608
X245 Trichrome Slide 27 2018_05_24 Scar 9.tif	X245	Young	2	Scar	9	685724	1703	730800	93.832	99.7523	5.935	0.233032
X104 Trichrome Slide 15 2018_05_31 Scar 8.tif	X104	Young	3	Scar	8	637219	39	730800	87.1947	99.9939	12.7999	0.00533662
X104 Trichrome Slide 15 2018_05_31 Scar 6.tif	X104	Young	3	Scar	6	612746	15664	730800	83.8459	97.5074	14.0107	2.1434
X104 Trichrome Slide 15 2018_05_31 Scar 9.tif	X104	Young	3	Scar	9	571357	2713	730800	78.1824	99.5274	21.4464	0.371237
X104 Trichrome Slide 15 2018_05_31 Scar 3.tif	X104	Young	3	Scar	3	573159	616	730800	78.429	99.8926	21.4867	0.0842912
X104 Trichrome Slide 15 2018_05_31 Scar 7.tif	X104	Young	3	Scar	7	563729	518	730800	77.1386	99.9082	22.7905	0.0708812
X104 Trichrome Slide 15 2018_05_31 Scar 2.tif	X104	Young	3	Scar	2	548285	2457	730800	75.0253	99.5539	24.6385	0.336207
X104 Trichrome Slide 15 2018_05_31 Scar 4.tif	X104	Young	3	Scar	4	544948	1114	730800	74.5687	99.796	25.2789	0.152436
X104 Trichrome Slide 15 2018_05_31 Scar 5.tif	X104	Young	3	Scar	5	510209	1551	730800	69.8151	99.6969	29.9726	0.212233
X104 Trichrome Slide 15 2018_05_31 Scar 10.tif	X104	Young	3	Scar	1	506755	790	730800	69.3425	99.8443	30.5494	0.108101
X104 Trichrome Slide 15 2018_05_31 Scar 1.tif	X104	Young	3	Scar	1	483665	2061	730800	66.183	99.5757	33.535	0.28202
X106 Trichrome slide 10 2018_08_30 RZ 8.tif	X106	Young	3	RZ	8	24941	570996	730800	3.41284	4.18517	18.4542	78.133
X106 Trichrome slide 10 2018_08_30 RZ 6.tif	X106	Young	3	RZ	6	21297	570304	730800	2.9142	3.59989	19.0475	78.0383
X106 Trichrome slide 10 2018_08_30 RZ 9.tif	X106	Young	3	RZ	9	20129	502398	730800	2.75438	3.85224	28.4993	68.7463
X106 Trichrome slide 10 2018_08_30 RZ 2.tif	X106	Young	3	RZ	2	19012	497661	730800	2.60153	3.6797	29.3004	68.0981
X106 Trichrome slide 10 2018_08_30 RZ 5.tif	X106	Young	3	RZ	5	28063	482661	730800	3.84004	5.49475	30.1144	66.0456
X106 Trichrome slide 10 2018_08_30 RZ 10.tif	X106	Young	3	RZ	1	15932	488981	730800	2.18008	3.1554	30.9096	66.9104
X106 Trichrome slide 10 2018_08_30 RZ 1.tif	X106	Young	3	RZ	1	25169	470724	730800	3.44403	5.07549	32.1438	64.4122
X106 Trichrome slide 10 2018_08_30 RZ 4.tif	X106	Young	3	RZ	4	37106	444775	730800	5.07745	7.70024	34.0612	60.8614
X106 Trichrome slide 10 2018_08_30 RZ 3.tif	X106	Young	3	RZ	3	66914	405591	730800	9.15627	14.1615	35.3441	55.4996
X106 Trichrome slide 10 2018_08_30 RZ 7.tif	X106	Young	3	RZ	7	32010	433051	730800	4.38013	6.88297	36.3628	59.2571
X106 Trichrome slide 10 2018_08_30 Scar 5.tif	X106	Young	3	Scar	5	658552	800	730800	90.1138	99.8787	9.77668	0.109469
X106 Trichrome slide 10 2018_08_30 Scar 3.tif	X106	Young	3	Scar	3	626318	528	730800	85.7031	99.9158	14.2247	0.0722496
X106 Trichrome slide 10 2018_08_30 Scar 9.tif	X106	Young	3	Scar	9	594042	143	730800	81.2865	99.9759	18.6939	0.0195676
X106 Trichrome slide 10 2018_08_30 Scar 8.tif	X106	Young	3	Scar	8	588561	903	730800	80.5365	99.8468	19.3399	0.123563
X106 Trichrome slide 10 2018_08_30 Scar 1.tif	X106	Young	3	Scar	1	571019	2798	730800	78.1362	99.5124	21.481	0.382868
X106 Trichrome slide 10 2018_08_30 Scar 4.tif	X106	Young	3	Scar	4	572899	115	730800	78.3934	99.9799	21.5909	0.0157362
X106 Trichrome slide 10 2018_08_30 Scar 7.tif	X106	Young	3	Scar	7	558615	840	730800	76.4388	99.8499	23.4462	0.114943
X106 Trichrome slide 10 2018_08_30 Scar 6.tif	X106	Young	3	Scar	6	556340	2194	730800	76.1275	99.6072	23.5722	0.300219
X106 Trichrome slide 10 2018_08_30 Scar 10.tif	X106	Young	3	Scar	1	518346	5422	730800	70.9286	98.9648	28.3295	0.741927
X106 Trichrome slide 10 2018_08_30 Scar 2.tif	X106	Young	3	Scar	2	492072	4931	730800	67.3333	99.0079	31.9919	0.67474
X219 2020_11_16 Trichrome Abby RZ 3.tif	X219	Young	3	RZ	3	184	726489	730800	0.0251779	0.0253209	0.564724	99.4101
X219 2020_11_16 Trichrome Abby RZ 7.tif	X219	Young	3	RZ	7	81	726181	730800	0.0110837	0.011153	0.620963	99.368
X219 2020_11_16 Trichrome Abby RZ 9.tif	X219	Young	3	RZ	9	1778	724137	730800	0.243295	0.244932	0.668446	99.0883
X219 2020_11_16 Trichrome Abby RZ 6.tif	X219	Young	3	RZ	6	318	724465	730800	0.043514	0.0438752	0.823344	99.1331
X219 2020_11_16 Trichrome Abby RZ 8.tif	X219	Young	3	RZ	8	392	723264	730800	0.0536398	0.0541694	0.977559	98.9688
X219 2020_11_16 Trichrome Abby RZ 1.tif	X219	Young	3	RZ	1	514	722698	730800	0.0703339	0.0710718	1.03831	98.8914
X219 2020_11_16 Trichrome Abby RZ 2.tif	X219	Young	3	RZ	2	570	721689	730800	0.0779967	0.0789191	1.16872	98.7533
X219 2020_11_16 Trichrome Abby RZ 4.tif	X219	Young	3	RZ	4	689	720982	730800	0.0942802	0.0954729	1.24918	98.6565
X219 2020_11_16 Trichrome Abby RZ 5.tif	X219	Young	3	RZ	5	2182	717685	730800	0.298577	0.303112	1.49603	98.2054
X219 2020_11_16 Trichrome Abby RZ 10.tif	X219	Young	3	RZ	1	4711	712893	730800	0.644636	0.65649	1.80569	97.5497
X219 Trichrome Slide 38 2020_12_10 Scar 4.tif	X219	Young	3	Scar	4	598085	53645	730800	81.8398	91.7688	10.8196	7.34059
X219 Trichrome Slide 38 2020_12_10 Scar 8.tif	X219	Young	3	Scar	8	597125	8214	730800	81.7084	98.6431	17.1676	1.12397
X219 Trichrome Slide 38 2020_12_10 Scar 5.tif	X219	Young	3	Scar	5	590426	2567	730800	80.7917	99.5671	18.857	0.351259
X219 Trichrome Slide 38 2020_12_10 Scar 7.tif	X219	Young	3	Scar	7	554242	4815	730800	75.8404	99.1387	23.5007	0.658867
X219 Trichrome Slide 38 2020_12_10 Scar 10.tif	X219	Young	3	Scar	1	527009	26069	730800	72.114	95.2866	24.3188	3.56719
X219 Trichrome Slide 38 2020_12_10 Scar 2.tif	X219	Young	3	Scar	2	481650	64921	730800	65.9072	88.1221	25.2092	8.88355
X219 Trichrome Slide 38 2020_12_10 Scar 1.tif	X219	Young	3	Scar	1	508073	26262	730800	69.5229	95.0851	26.8836	3.5936
X219 Trichrome Slide 38 2020_12_10 Scar 3.tif	X219	Young	3	Scar	3	462047	67307	730800	63.2248	87.2851	27.5651	9.21004
X219 Trichrome Slide 38 2020_12_10 Scar 9.tif	X219	Young	3	Scar	9	416467	42654	730800	56.9878	90.7096	37.1756	5.83662
X219 Trichrome Slide 38 2020_12_10 Scar 6.tif	X219	Young	3	Scar	6	401348	4332	730800	54.919	98.9322	44.4882	0.592775
X228 Trichrome 2020-10-22 RZ 3.tif	X228	Young	3	RZ	3	8	729234	730800	0.00109469	0.00109703	0.213191	99.7857
X228 Trichrome 2020-10-22 RZ 5.tif	X228	Young	3	RZ	5	61	728063	730800	0.00834702	0.00837769	0.366174	99.6255
X228 Trichrome 2020-10-22 RZ 7.tif	X228	Young	3	RZ	7	216	725560	730800	0.0295567	0.0297612	0.687466	99.283
X228 Trichrome 2020-10-22 RZ 4.tif	X228	Young	3	RZ	4	205	725219	730800	0.0280515	0.0282593	0.735632	99.2363
X228 Trichrome 2020-10-22 RZ 9.tif	X228	Young	3	RZ	9	766	722980	730800	0.104817	0.105838	0.965244	98.9299
X228 Trichrome 2020-10-22 RZ 2.tif	X228	Young	3	RZ	2	3143	720174	730800	0.430077	0.434526	1.02395	98.546
X228 Trichrome 2020-10-22 RZ 8.tif	X228	Young	3	RZ	8	4477	718533	730800	0.612616	0.619217	1.06596	98.3214
X228 Trichrome 2020-10-22 RZ 10.tif	X228	Young	3	RZ	1	3353	719225	730800	0.458812	0.464033	1.12507	98.4161
X228 Trichrome 2020-10-22 RZ 1.tif	X228	Young	3	RZ	1	19018	680089	730800	2.60235	2.72033	4.33675	93.0609
X228 Trichrome 2020-10-22 Scar 7.tif	X228	Young	3	Scar	7	688185	9150	730800	94.1687	98.6879	4.57923	1.25205
X228 Trichrome 2020-10-22 Scar 2.tif	X228	Young	3	Scar	2	660715	11186	730800	90.4098	98.3352	8.05952	1.53065
X228 Trichrome 2020-10-22 Scar 6.tif	X228	Young	3	Scar	6	615052	45141	730800	84.1615	93.1625	9.6616	6.17693
X228 Trichrome 2020-10-22 Scar 3.tif	X228	Young	3	Scar	3	629156	8416	730800	86.0914	98.68	12.757	1.15161
X228 Trichrome 2020-10-22 Scar 1.tif	X228	Young	3	Scar	1	555312	64606	730800	75.9869	89.5783	15.1727	8.84045
X228 Trichrome 2020-10-22 Scar 5.tif	X228	Young	3	Scar	5	539229	77021	730800	73.7861	87.5017	15.6746	10.5393
X228 Trichrome 2020-10-22 Scar 4.tif	X228	Young	3	Scar	4	603624	5721	730800	82.5977	99.0611	16.6195	0.782841
X228 Trichrome 2020-10-22 Scar 10.tif	X228	Young	3	Scar	1	583814	11728	730800	79.887	98.0307	18.5082	1.60482
X228 Trichrome 2020-10-22 Scar 8.tif	X228	Young	3	Scar	8	574935	11712	730800	78.672	98.0036	19.7254	1.60263
X228 Trichrome 2020-10-22 Scar 9.tif	X228	Young	3	Scar	9	556523	20434	730800	76.1526	96.4583	21.0513	2.79611
X230 Trichrome 2020-10-22 RZ 2.tif	X230	Young	3	RZ	2	245	723177	730800	0.0335249	0.0338668	1.00958	98.9569
X230 Trichrome 2020-10-22 RZ 8.tif	X230	Young	3	RZ	8	5034	714895	730800	0.688834	0.699236	1.48755	97.8236
X230 Trichrome 2020-10-22 RZ 10.tif	X230	Young	3	RZ	1	1533	715595	730800	0.20977	0.213769	1.87083	97.9194
X230 Trichrome 2020-10-22 RZ 6.tif	X230	Young	3	RZ	6	1704	715277	730800	0.233169	0.237663	1.89094	97.8759
X230 Trichrome 2020-10-22 RZ 4.tif	X230	Young	3	RZ	4	2133	714554	730800	0.291872	0.297619	1.93117	97.777
X230 Trichrome 2020-10-22 RZ 7.tif	X230	Young	3	RZ	7	4326	710972	730800	0.591954	0.604783	2.12124	97.2868
X230 Trichrome 2020-10-22 RZ 9.tif	X230	Young	3	RZ	9	3933	707832	730800	0.538177	0.55257	2.60468	96.8571
X230 Trichrome 2020-10-22 RZ 3.tif	X230	Young	3	RZ	3	2937	705651	730800	0.401888	0.414486	3.03941	96.5587
X230 Trichrome 2020-10-22 RZ 5.tif	X230	Young	3	RZ	5	6319	693483	730800	0.864669	0.90297	4.24165	94.8937
X230 Trichrome 2020-10-22 RZ 1.tif	X230	Young	3	RZ	1	37068	639581	730800	5.07225	5.47817	7.40982	87.5179
X230 Trichrome 2020-10-22 Scar 1.tif	X230	Young	3	Scar	1	571445	20559	730800	78.1944	96.5272	18.9923	2.81322
X230 Trichrome 2020-10-22 Scar 10.tif	X230	Young	3	Scar	1	568642	20927	730800	77.8109	96.4505	19.3255	2.86357
X230 Trichrome 2020-10-22 Scar 4.tif	X230	Young	3	Scar	4	525927	25988	730800	71.9659	95.2913	24.478	3.5561
X230 Trichrome 2020-10-22 Scar 8.tif	X230	Young	3	Scar	8	528427	12494	730800	72.308	97.6902	25.9823	1.70963
X230 Trichrome 2020-10-22 Scar 5.tif	X230	Young	3	Scar	5	524689	6577	730800	71.7965	98.762	27.3035	0.899973
X230 Trichrome 2020-10-22 Scar 7.tif	X230	Young	3	Scar	7	504118	21315	730800	68.9817	95.9433	28.1017	2.91667
X230 Trichrome 2020-10-22 Scar 9.tif	X230	Young	3	Scar	9	422635	36750	730800	57.8318	92.0002	37.1394	5.02874
X230 Trichrome 2020-10-22 Scar 6.tif	X230	Young	3	Scar	6	419923	24875	730800	57.4607	94.4076	39.1355	3.4038
X230 Trichrome 2020-10-22 Scar 2.tif	X230	Young	3	Scar	2	420847	17654	730800	57.5872	95.974	39.9971	2.41571
X230 Trichrome 2020-10-22 Scar 3.tif	X230	Young	3	Scar	3	395669	20625	730800	54.1419	95.0456	43.0359	2.82225
91442 Slide 1 Trichrome 2020_07_01 RZ 8.tif	91442	Young	12	RZ	8	43800	1618629	1822392	2.40343	2.6347	8.77764	88.8189
91442 Slide 1 Trichrome 2020_07_01 RZ 10.tif	91442	Young	12	RZ	1	85654	1508605	1822392	4.70009	5.37265	12.5183	82.7816
91442 Slide 1 Trichrome 2020_07_01 RZ 9.tif	91442	Young	12	RZ	9	52429	1538746	1822392	2.87693	3.29499	12.6876	84.4355
91442 Slide 1 Trichrome 2020_07_01 RZ 7.tif	91442	Young	12	RZ	7	60630	1497512	1822392	3.32695	3.89117	14.5002	82.1729
91442 Slide 1 Trichrome 2020_07_01 RZ 5.tif	91442	Young	12	RZ	5	79406	1471887	1822392	4.35724	5.1187	14.876	80.7668
91442 Slide 1 Trichrome 2020_07_01 RZ 4.tif	91442	Young	12	RZ	4	48589	1485026	1822392	2.66622	3.16827	15.846	81.4877
91442 Slide 1 Trichrome 2020_07_01 RZ 3.tif	91442	Young	12	RZ	3	62208	1470268	1822392	3.41354	4.05931	15.9085	80.6779
91442 Slide 1 Trichrome 2020_07_01 RZ 2.tif	91442	Young	12	RZ	2	117146	1396644	1822392	6.42814	7.73859	16.9339	76.638
91442 Slide 1 Trichrome 2020_07_01 RZ 6.tif	91442	Young	12	RZ	6	81735	1414159	1822392	4.48504	5.46396	17.9159	77.5991
91442 Slide 1 Trichrome 2020_07_01 RZ 1.tif	91442	Young	12	RZ	1	25630	1456401	1822392	1.40639	1.72938	18.6766	79.917
91442 Slide 1 Trichrome 2020_07_01 Scar 2.tif	91442	Young	12	Scar	2	1718762	6467	1822392	94.3135	99.6252	5.33162	0.354863
91442 Slide 1 Trichrome 2020_07_01 Scar 8.tif	91442	Young	12	Scar	8	1670328	12447	1822392	91.6558	99.2603	7.66119	0.683003
91442 Slide 1 Trichrome 2020_07_01 Scar 3.tif	91442	Young	12	Scar	3	1615392	29664	1822392	88.6413	98.1968	9.73095	1.62775
91442 Slide 1 Trichrome 2020_07_01 Scar 1.tif	91442	Young	12	Scar	1	1587326	33325	1822392	87.1012	97.9437	11.0701	1.82864
91442 Slide 1 Trichrome 2020_07_01 Scar 6.tif	91442	Young	12	Scar	6	1583707	26857	1822392	86.9027	98.3324	11.6236	1.47372
91442 Slide 1 Trichrome 2020_07_01 Scar 9.tif	91442	Young	12	Scar	9	1586993	21881	1822392	87.083	98.64	11.7164	1.20067
91442 Slide 1 Trichrome 2020_07_01 Scar 7.tif	91442	Young	12	Scar	7	1489937	67765	1822392	81.7572	95.6497	14.5243	3.71846
91442 Slide 1 Trichrome 2020_07_01 Scar 10.tif	91442	Young	12	Scar	1	1509420	10625	1822392	82.8263	99.301	16.5907	0.583025
91442 Slide 1 Trichrome 2020_07_01 Scar 5.tif	91442	Young	12	Scar	5	1442358	65260	1822392	79.1464	95.6713	17.2726	3.58101
91442 Slide 1 Trichrome 2020_07_01 Scar 4.tif	91442	Young	12	Scar	4	1405457	30731	1822392	77.1216	97.8602	21.1921	1.6863
X203 LV Slide 7 Trichrome 2019-07-25 RZ 6.tif	X203	Young	12	RZ	6	7519	711373	730800	1.02887	1.04592	1.62945	97.3417
X203 LV Slide 7 Trichrome 2019-07-25 RZ 10.tif	X203	Young	12	RZ	1	17725	700940	730800	2.42542	2.46638	1.66051	95.9141
X203 LV Slide 7 Trichrome 2019-07-25 RZ 5.tif	X203	Young	12	RZ	5	17925	700322	730800	2.45279	2.49566	1.71771	95.8295
X203 LV Slide 7 Trichrome 2019-07-25 RZ 4.tif	X203	Young	12	RZ	4	22257	694014	730800	3.04557	3.10734	1.9881	94.9663
X203 LV Slide 7 Trichrome 2019-07-25 RZ 8.tif	X203	Young	12	RZ	8	19830	693877	730800	2.71346	2.77845	2.33894	94.9476
X203 LV Slide 7 Trichrome 2019-07-25 RZ 9.tif	X203	Young	12	RZ	9	19830	693877	730800	2.71346	2.77845	2.33894	94.9476
X203 LV Slide 7 Trichrome 2019-07-25 RZ 7.tif	X203	Young	12	RZ	7	12044	700105	730800	1.64806	1.69122	2.55213	95.7998
X203 LV Slide 7 Trichrome 2019-07-25 RZ 1.tif	X203	Young	12	RZ	1	6678	689589	730800	0.913793	0.959115	4.72537	94.3608
X203 LV Slide 7 Trichrome 2019-07-25 RZ 3.tif	X203	Young	12	RZ	3	31990	661394	730800	4.37739	4.61361	5.11987	90.5027
X203 LV Slide 7 Trichrome 2019-07-25 RZ 2.tif	X203	Young	12	RZ	2	24792	659653	730800	3.39245	3.6222	6.34305	90.2645
X203 LV Slide 7 Trichrome 2019-07-25 Scar 4.tif	X203	Young	12	Scar	4	722869	4075	730800	98.9148	99.4394	0.527641	0.557608
X203 LV Slide 7 Trichrome 2019-07-25 Scar 5.tif	X203	Young	12	Scar	5	719733	6638	730800	98.4856	99.0861	0.606048	0.90832
X203 LV Slide 7 Trichrome 2019-07-25 Scar 9.tif	X203	Young	12	Scar	9	723200	2316	730800	98.96	99.6808	0.723043	0.316913
X203 LV Slide 7 Trichrome 2019-07-25 Scar 8.tif	X203	Young	12	Scar	8	722838	1358	730800	98.9105	99.8125	0.903667	0.185824
X203 LV Slide 7 Trichrome 2019-07-25 Scar 3.tif	X203	Young	12	Scar	3	722821	977	730800	98.9082	99.865	0.958128	0.133689
X203 LV Slide 7 Trichrome 2019-07-25 Scar 1.tif	X203	Young	12	Scar	1	708861	6674	730800	96.9979	99.0673	2.08881	0.913246
X203 LV Slide 7 Trichrome 2019-07-25 Scar 6.tif	X203	Young	12	Scar	6	711026	393	730800	97.2942	99.9448	2.65203	0.0537767
X203 LV Slide 7 Trichrome 2019-07-25 Scar 7.tif	X203	Young	12	Scar	7	699187	7874	730800	95.6742	98.8864	3.24836	1.07745
X203 LV Slide 7 Trichrome 2019-07-25 Scar 10.tif	X203	Young	12	Scar	1	685594	1193	730800	93.8142	99.8263	6.02258	0.163246
X203 LV Slide 7 Trichrome 2019-07-25 Scar 2.tif	X203	Young	12	Scar	2	674861	1243	730800	92.3455	99.8162	7.4844	0.170088
X205 Slide 2 Trichrome 2020_07_01 RZ 5.tif	X205	Young	12	RZ	5	5037	667242	730800	0.689245	0.749243	8.0078	91.303
X205 Slide 2 Trichrome 2020_07_01 RZ 1.tif	X205	Young	12	RZ	1	9431	650625	730800	1.2905	1.42882	9.68035	89.0291
X205 Slide 2 Trichrome 2020_07_01 RZ 2.tif	X205	Young	12	RZ	2	12641	646489	730800	1.72975	1.91783	9.80706	88.4632
X205 Slide 2 Trichrome 2020_07_01 RZ 6.tif	X205	Young	12	RZ	6	11654	639004	730800	1.59469	1.79111	10.9663	87.439
X205 Slide 2 Trichrome 2020_07_01 RZ 3.tif	X205	Young	12	RZ	3	18504	619934	730800	2.53202	2.89832	12.6385	84.8295
X205 Slide 2 Trichrome 2020_07_01 RZ 9.tif	X205	Young	12	RZ	9	13881	624016	730800	1.89943	2.17606	12.7125	85.3881
X205 Slide 2 Trichrome 2020_07_01 RZ 7.tif	X205	Young	12	RZ	7	32221	599578	730800	4.409	5.09988	13.5469	82.0441
X205 Slide 2 Trichrome 2020_07_01 RZ 8.tif	X205	Young	12	RZ	8	14017	613929	730800	1.91804	2.2322	14.0742	84.0078
X205 Slide 2 Trichrome 2020_07_01 RZ 10.tif	X205	Young	12	RZ	1	29966	587622	730800	4.10044	4.8521	15.4915	80.408
X205 Slide 2 Trichrome 2020_07_01 RZ 4.tif	X205	Young	12	RZ	4	9185	605090	730800	1.25684	1.49526	15.9449	82.7983
X205 Slide 2 Trichrome 2020_07_01 Scar 2.tif	X205	Young	12	Scar	2	622313	5810	730800	85.155	99.075	14.0499	0.795019
X205 Slide 2 Trichrome 2020_07_01 Scar 1.tif	X205	Young	12	Scar	1	617380	8123	730800	84.48	98.7014	14.4085	1.11152
X205 Slide 2 Trichrome 2020_07_01 Scar 6.tif	X205	Young	12	Scar	6	610435	3200	730800	83.5297	99.4785	16.0324	0.437876
X205 Slide 2 Trichrome 2020_07_01 Scar 4.tif	X205	Young	12	Scar	4	596094	11031	730800	81.5673	98.1831	16.9232	1.50944
X205 Slide 2 Trichrome 2020_07_01 Scar 9.tif	X205	Young	12	Scar	9	589964	7119	730800	80.7285	98.8077	18.2973	0.974138
X205 Slide 2 Trichrome 2020_07_01 Scar 8.tif	X205	Young	12	Scar	8	588677	7216	730800	80.5524	98.789	18.4602	0.987411
X205 Slide 2 Trichrome 2020_07_01 Scar 3.tif	X205	Young	12	Scar	3	579419	11555	730800	79.2856	98.0448	19.1333	1.58114
X205 Slide 2 Trichrome 2020_07_01 Scar 5.tif	X205	Young	12	Scar	5	584401	6295	730800	79.9673	98.9343	19.1713	0.861385
X205 Slide 2 Trichrome 2020_07_01 Scar 7.tif	X205	Young	12	Scar	7	570031	3538	730800	78.001	99.3832	21.5149	0.484127
X205 Slide 2 Trichrome 2020_07_01 Scar 10.tif	X205	Young	12	Scar	1	527288	2996	730800	72.1522	99.435	27.4379	0.409962
X209 LV Trichrome 2021_04_14 Scar 1	X209	Young	12	Scar	1	786026	84915	1616472	48.626	90.2502	46.1209	5.25311
X209 LV Trichrome 2021_04_14 Scar 2	X209	Young	12	Scar	2	670723	64888	1616472	41.493	91.179	54.4928	4.01417
X209 LV Trichrome 2021_04_14 Scar 3	X209	Young	12	Scar	3	749102	57691	1616472	46.3418	92.8493	50.0893	3.56895
X209 LV Trichrome 2021_04_14 Scar 4	X209	Young	12	Scar	4	722377	67592	1616472	44.6885	91.4437	51.1301	4.18145
X209 LV Trichrome 2021_04_14 Scar 5	X209	Young	12	Scar	5	1069820	45447	1616472	66.1824	95.925	31.0061	2.81149
X209 LV Trichrome 2021_04_14 Scar 6	X209	Young	12	Scar	6	980636	49733	1616472	60.6652	95.1733	36.2582	3.07664
X209 LV Trichrome 2021_04_14 Scar 7	X209	Young	12	Scar	7	858498	144378	1616472	53.1094	85.6036	37.959	8.93167
X209 LV Trichrome 2021_04_14 Scar 8	X209	Young	12	Scar	8	812546	50740	1616472	50.2666	94.1225	46.5944	3.13893
X209 LV Trichrome 2021_04_14 Scar 9	X209	Young	12	Scar	9	812957	68983	1616472	50.2921	92.1783	45.4404	4.2675
X209 LV Trichrome 2021_04_14 Scar 10	X209	Young	12	Scar	10	749580	62835	1616472	46.3714	92.2657	49.7415	3.88717
X209 LV Trichrome 2021_04_14 RZ 1	X209	Young	12	RZ	1	27784	1132890	1616472	1.7188	2.39378	28.1971	70.0841
X209 LV Trichrome 2021_04_14 RZ 2	X209	Young	12	RZ	2	17176	1230810	1616472	1.06256	1.3763	22.7957	76.1417
X209 LV Trichrome 2021_04_14 RZ 3	X209	Young	12	RZ	3	19490	1202404	1616472	1.20571	1.59506	24.4098	74.3845
X209 LV Trichrome 2021_04_14 RZ 4	X209	Young	12	RZ	4	16928	1220834	1616472	1.04722	1.36763	23.4282	75.5246
X209 LV Trichrome 2021_04_14 RZ 5	X209	Young	12	RZ	5	37476	1163471	1616472	2.31838	3.12054	25.7057	71.9759
X209 LV Trichrome 2021_04_14 RZ 6	X209	Young	12	RZ	6	64715	1132548	1616472	4.00347	5.40525	25.9336	70.063
X209 LV Trichrome 2021_04_14 RZ 7	X209	Young	12	RZ	7	41848	1196547	1616472	2.58885	3.37921	23.389	74.0221
X209 LV Trichrome 2021_04_14 RZ 8	X209	Young	12	RZ	8	16140	1190112	1616472	0.998471	1.33803	25.3775	73.624
X209 LV Trichrome 2021_04_14 RZ 9	X209	Young	12	RZ	9	48287	1163802	1616472	2.98718	3.98378	25.0164	71.9964
X209 LV Trichrome 2021_04_14 RZ 10	X209	Young	12	RZ	10	45986	1162927	1616472	2.84484	3.80391	25.2129	71.9423
