# Supplementary material for: Myofibroblast senescence promotes arrhythmogenic remodeling in the aged infarcted rabbit heart
Source: eLife. 2023 May 19;12:e84088. doi: 10.7554/eLife.84088 (PMC10259375; doi:10.7554/eLife.84088)
Supplement: Figure 3—source data 1. — Tabs contain raw data corresponding to panel B and panel D. [file elife-84088-fig3-data1.xlsx]

## Sheet: Panel B
Aged		Young
RZ	IBZ	RZ	IBZ
158.054	172.09	212.237	206.249
151.551	182.748	229.407	218.996
165.274	172.265	221.916	190.422
175.44	180.328	184.788	168.705
196.767	208.298	210.563	174.518
		205.117	148.67
		227.6	162.022
		252.358	245.02
		183.151	156.256
		218.703	185.039
		184.054	153.876
		193.431	189.567
		186.999	171.013
		209.557	202.234
		186.233	172.346
		196.11	173.871
		135.356	122.937

## Sheet: Panel D
VF Frequency			CL That Induces VF
Aged	Young		Aged	Young
6.4	11.2		125	150
13	9		145	180
16	5.6		150	160
11	8.9		210	200
11	12		160	150
	10		225	170
	8			170
	12.5			150
	9.5			160
	8			200
	11.6			140
	9.6			130
	8.95			160
	13.31			150
	8.13			135
	6.01			140
	10.9399			140
	9.32768
