# Supplementary material for: Myofibroblast senescence promotes arrhythmogenic remodeling in the aged infarcted rabbit heart
Source: eLife. 2023 May 19;12:e84088. doi: 10.7554/eLife.84088 (PMC10259375; doi:10.7554/eLife.84088)
Supplement: Figure 4—figure supplement 1—source data 1. — Data corresponds to panel B. [file elife-84088-fig4-figsupp1-data1.xlsx]

## Sheet: Sheet1
Rabbit #/ # image	non-Sn nuclei	senescent nuclei	% of senescence cell
91 Rb	61	3	0.046875
91 Rb	49	0	0
91 Rb	67	0	0
91 Rb	49	0	0
91 Rb	66	0	0
91 Rb	60	0	0
91 Rb	69	0	0					Rb ID	% of senescence cell
91 Rb	40	0	0					91	0.0132548	0.0131487
91 Rb	62	0	0					1595	0.00236407
91 Rb	48	0	0					1596	0.00910747
91 Rb	49	1	0.02					1889	0.0110345
91 Rb	50	5	0.0909091
			#DIV/0!
1595 Rabbit	61	0	0					1881	0
2	74	0	0					1882	0.0111421
3	60	0	0					1883	0.00289017
4	75	0	0					1884	0.00692042
5	142	2	0.0138889
7	45	0	0
8	98	0	0
9	80	0	0
10	63	0	0
11	76	0	0
12	70	0	0
			#DIV/0!
1596 Rab	117	0	0
2	150	1	0.00662252
3	85	0	0
4	52	1	0.0188679
5	119	1	0.00833333
7	113	0	0
8	60	0	0
9	61	0	0
10	87	5	0.0543478
11	122	2	0.016129
12	122	0	0
			#DIV/0!
1881 Rab	108	0	0
2	101	0	0
3	69	0	0
4	65	0	0
5	75	0	0
6	64	0	0
7	77	0	0
8	68	0	0
9	51	0	0
10	86	0	0
12	107	0	0
			#DIV/0!
1889 Rab	32	0	0
2	53	0	0
3	46	0	0
4	42	0	0
5	83	0	0
6	95	2	0.0206186
7	71	0	0
8	61	0	0
9	103	4	0.0373832
10	75	2	0.025974
11	56	0	0
			#DIV/0!
1884 Rab	109	4	0.0353982
2	64	0	0
3			#DIV/0!
4	39	0	0
5	48	0	0
6	41	0	0
7	71	0	0
8	54	0	0
9	58	0	0
10	44	0	0
11	46	0	0
			#DIV/0!
1883 Rab	51	0	0
2	42	0	0
3	71	0	0
4	77	0	0
5	69	1	0.0142857
6	68	0	0
7	86	0	0
8	96	1	0.0103093
9	65	0	0
10	65	0	0
			#DIV/0!
1882 Rab	113	0	0
2	56	1	0.0175439
3	108	0	0
5	48	5	0.0943396
6	41	0	0
7	49	0	0
8	46	0	0
9	132	0	0
10	71	2	0.0273973
11	46	0	0
