# Supplementary material for: Myofibroblast senescence promotes arrhythmogenic remodeling in the aged infarcted rabbit heart
Source: eLife. 2023 May 19;12:e84088. doi: 10.7554/eLife.84088 (PMC10259375; doi:10.7554/eLife.84088)
Supplement: Figure 4—source data 1. — Tabs contain data corresponding to panel A, panels E and F, panels E and G, and panel H, respectively. [file elife-84088-fig4-data1.xlsx]

## Sheet: Panel A
					*Note: values of 1 indicate omission of counting where no SABgal+ are present
Rabbit ID	Age Group	Weeks Post-MI	Zone	SABgal+ Non-CMs	SABgal- Non-CMs	SABgal- CM	SABgal+ CMs	% SABgal+
CH233	Aged	1	IBZ	0	1	0	0	0
CH233	Aged	1	IBZ	3	289	8	0	1
CH233	Aged	1	IBZ	0	1	0	0	0
CH233	Aged	1	IBZ	5	175	11	0	2.6178
CH233	Aged	1	IBZ	0	1	0	0	0
CH233	Aged	1	IBZ	49	68	11	0	38.2812
CH233	Aged	1	IBZ	0	173	10	0	0
CH233	Aged	1	IBZ	1	186	12	0	0.502513
CH233	Aged	1	IBZ	49	157	16	0	22.0721
CH233	Aged	1	IBZ	2	141	13	0	1.28205
CH233	Aged	1	IBZ	171	125	15	0	54.9839
CH233	Aged	1	IBZ	385	39	18	0	87.1041
CH233	Aged	1	RZ	0	1	0	0	0
CH233	Aged	1	RZ	0	1	0	0	0
CH233	Aged	1	RZ	0	1	0	0	0
CH233	Aged	1	RZ	0	1	0	0	0
CH233	Aged	1	RZ	0	1	0	0	0
CH233	Aged	1	RZ	0	140	33	0	0
CH233	Aged	1	RZ	0	101	24	0	0
CH233	Aged	1	RZ	0	96	21	0	0
CH233	Aged	1	RZ	1	102	23	0	0.793651
CH233	Aged	1	RZ	0	73	17	0	0
CH233	Aged	1	Scar	3	312	0	0	0.952381
CH233	Aged	1	Scar	0	1	0	0	0
CH233	Aged	1	Scar	0	1	0	0	0
CH233	Aged	1	Scar	0	1	0	0	0
CH233	Aged	1	Scar	0	1	0	0	0
CH233	Aged	1	Scar	13	247	0	0	5
CH233	Aged	1	Scar	2	213	0	0	0.930233
CH233	Aged	1	Scar	9	260	0	0	3.34572
CH233	Aged	1	Scar	8	209	0	0	3.68664
CH233	Aged	1	Scar	4	182	0	0	2.15054
CH311	Aged	1	IBZ	0	1	0	0	0
CH311	Aged	1	IBZ	0	1	0	0	0
CH311	Aged	1	IBZ	0	1	0	0	0
CH311	Aged	1	IBZ	0	1	0	0	0
CH311	Aged	1	IBZ	3	140	21	0	1.82927
CH311	Aged	1	IBZ	6	171	12	0	3.1746
CH311	Aged	1	IBZ	0	125	14	0	0
CH311	Aged	1	IBZ	3	120	10	0	2.25564
CH311	Aged	1	IBZ	9	117	8	0	6.71642
CH311	Aged	1	IBZ	3	126	11	0	2.14286
CH311	Aged	1	IBZ	67	133	25	0	29.7778
CH311	Aged	1	RZ	0	1	0	0	0
CH311	Aged	1	RZ	0	1	0	0	0
CH311	Aged	1	RZ	0	1	0	0	0
CH311	Aged	1	RZ	0	1	0	0	0
CH311	Aged	1	RZ	0	1	0	0	0
CH311	Aged	1	RZ	0	86	16	0	0
CH311	Aged	1	RZ	0	100	18	0	0
CH311	Aged	1	RZ	0	146	22	0	0
CH311	Aged	1	RZ	0	122	17	0	0
CH311	Aged	1	RZ	0	105	19	0	0
CH311	Aged	1	Scar	0	1	0	0	0
CH311	Aged	1	Scar	0	1	0	0	0
CH311	Aged	1	Scar	0	1	0	0	0
CH311	Aged	1	Scar	0	1	0	0	0
CH311	Aged	1	Scar	15	154	0	0	8.87574
CH311	Aged	1	Scar	14	328	0	0	4.09357
CH311	Aged	1	Scar	9	164	2	0	5.14286
CH311	Aged	1	Scar	0	308	0	0	0
CH311	Aged	1	Scar	1	244	0	0	0.408163
CH311	Aged	1	Scar	4	210	0	0	1.86916
F981	Aged	1	IBZ	29	144	11	0	15.7609
F981	Aged	1	IBZ	8	138	14	0	5
F981	Aged	1	IBZ	21	122	11	0	13.6364
F981	Aged	1	IBZ	5	152	18	0	2.85714
F981	Aged	1	IBZ	25	147	8	0	13.8889
F981	Aged	1	IBZ	71	39	21	0	54.1985
F981	Aged	1	IBZ	85	146	9	0	35.4167
F981	Aged	1	IBZ	68	130	11	0	32.5359
F981	Aged	1	IBZ	83	162	18	0	31.5589
F981	Aged	1	IBZ	12	165	17	0	6.18557
F981	Aged	1	IBZ	125	57	19	0	62.1891
F981	Aged	1	RZ	0	1	0	0	0
F981	Aged	1	RZ	0	1	0	0	0
F981	Aged	1	RZ	0	1	0	0	0
F981	Aged	1	RZ	1	169	0	0	0.588235
F981	Aged	1	RZ	0	1	0	0	0
F981	Aged	1	RZ	0	80	36	0	0
F981	Aged	1	RZ	0	98	44	0	0
F981	Aged	1	RZ	0	92	41	0	0
F981	Aged	1	RZ	0	110	30	0	0
F981	Aged	1	RZ	0	141	38	0	0
F981	Aged	1	Scar	59	83	0	0	41.5493
F981	Aged	1	Scar	70	115	0	0	37.8378
F981	Aged	1	Scar	43	215	0	0	16.6667
F981	Aged	1	Scar	61	72	0	0	45.8647
F981	Aged	1	Scar	103	116	0	0	47.032
F981	Aged	1	Scar	67	92	0	0	42.1384
F981	Aged	1	Scar	78	129	0	0	37.6812
F981	Aged	1	Scar	105	102	4	0	49.763
F981	Aged	1	Scar	115	207	3	0	35.3846
F981	Aged	1	Scar	7	199	1	0	3.38164
X020	Aged	1	IBZ	5	124	19	0	3.37838
X020	Aged	1	IBZ	4	182	16	0	1.9802
X020	Aged	1	IBZ	12	124	21	0	7.64331
X020	Aged	1	IBZ	0	1	0	0	0
X020	Aged	1	IBZ	9	146	16	0	5.26316
X020	Aged	1	IBZ	6	128	13	0	4.08163
X020	Aged	1	IBZ	3	102	13	0	2.54237
X020	Aged	1	IBZ	1	166	8	0	0.571429
X020	Aged	1	IBZ	1	130	11	0	0.704225
X020	Aged	1	IBZ	0	142	9	0	0
X020	Aged	1	RZ	0	1	0	0	0
X020	Aged	1	RZ	0	1	0	0	0
X020	Aged	1	RZ	0	1	0	0	0
X020	Aged	1	RZ	0	1	0	0	0
X020	Aged	1	RZ	0	1	0	0	0
X020	Aged	1	RZ	0	108	30	0	0
X020	Aged	1	RZ	0	122	28	0	0
X020	Aged	1	RZ	0	101	25	0	0
X020	Aged	1	RZ	0	146	22	0	0
X020	Aged	1	RZ	0	143	24	0	0
X020	Aged	1	Scar	40	131	0	0	23.3918
X020	Aged	1	Scar	10	211	0	0	4.52489
X020	Aged	1	Scar	17	187	0	0	8.33333
X020	Aged	1	Scar	28	200	0	0	12.2807
X020	Aged	1	Scar	10	225	0	0	4.25532
X020	Aged	1	Scar	45	132	0	0	25.4237
X020	Aged	1	Scar	18	116	1	0	13.3333
X020	Aged	1	Scar	15	148	0	0	9.20245
X020	Aged	1	Scar	14	155	0	0	8.28402
X020	Aged	1	Scar	40	139	0	0	22.3464
X020	Aged	1	Scar	273	96	0	0	73.9837
F184	Aged	2	IBZ	4	184	32	0	1.81818
F184	Aged	2	IBZ	0	1	0	0	0
F184	Aged	2	IBZ	0	1	0	0	0
F184	Aged	2	IBZ	6	180	21	0	2.89855
F184	Aged	2	IBZ	0	1	0	0	0
F184	Aged	2	IBZ	3	216	45	0	1.13636
F184	Aged	2	IBZ	0	190	13	0	0
F184	Aged	2	IBZ	4	250	15	0	1.48699
F184	Aged	2	IBZ	3	198	12	0	1.40845
F184	Aged	2	IBZ	5	204	9	0	2.29358
F184	Aged	2	IBZ	310	46	14	0	83.7838
F184	Aged	2	RZ	0	1	0	0	0
F184	Aged	2	RZ	0	1	0	0	0
F184	Aged	2	RZ	0	1	0	0	0
F184	Aged	2	RZ	0	1	0	0	0
F184	Aged	2	RZ	0	1	0	0	0
F184	Aged	2	RZ	1	127	23	0	0.662252
F184	Aged	2	RZ	0	79	24	0	0
F184	Aged	2	RZ	0	63	17	0	0
F184	Aged	2	RZ	0	72	24	0	0
F184	Aged	2	RZ	0	105	24	0	0
F184	Aged	2	Scar	60	167	0	0	26.4317
F184	Aged	2	Scar	3	151	0	0	1.94805
F184	Aged	2	Scar	3	110	0	0	2.65487
F184	Aged	2	Scar	4	166	0	0	2.35294
F184	Aged	2	Scar	60	146	0	0	29.1262
F184	Aged	2	Scar	19	148	0	0	11.3772
F184	Aged	2	Scar	9	178	0	0	4.81283
F184	Aged	2	Scar	11	142	0	0	7.18954
F184	Aged	2	Scar	14	178	0	0	7.29167
F184	Aged	2	Scar	15	163	0	0	8.42697
F322	Aged	2	IBZ	8	205	15	0	3.50877
F322	Aged	2	IBZ	0	1	0	0	0
F322	Aged	2	IBZ	5	231	10	0	2.03252
F322	Aged	2	IBZ	7	235	12	0	2.75591
F322	Aged	2	IBZ	0	1	0	0	0
F322	Aged	2	IBZ	2	151	18	0	1.16959
F322	Aged	2	IBZ	0	158	12	0	0
F322	Aged	2	IBZ	3	180	16	0	1.50754
F322	Aged	2	IBZ	0	142	10	0	0
F322	Aged	2	IBZ	0	141	12	0	0
F322	Aged	2	RZ	0	1	0	0	0
F322	Aged	2	RZ	0	1	0	0	0
F322	Aged	2	RZ	0	1	0	0	0
F322	Aged	2	RZ	0	1	0	0	0
F322	Aged	2	RZ	0	1	0	0	0
F322	Aged	2	RZ	0	94	22	0	0
F322	Aged	2	RZ	0	135	27	0	0
F322	Aged	2	RZ	0	136	32	0	0
F322	Aged	2	RZ	0	84	20	0	0
F322	Aged	2	RZ	0	137	21	0	0
F322	Aged	2	Scar	28	180	0	0	13.4615
F322	Aged	2	Scar	18	214	0	0	7.75862
F322	Aged	2	Scar	5	156	0	0	3.10559
F322	Aged	2	Scar	20	176	0	0	10.2041
F322	Aged	2	Scar	12	216	0	0	5.26316
F322	Aged	2	Scar	17	262	0	0	6.09319
F322	Aged	2	Scar	22	229	0	0	8.76494
F322	Aged	2	Scar	9	272	0	0	3.20285
F322	Aged	2	Scar	0	250		0	0
F949	Aged	2	IBZ	15	221	9	0	6.12245
F949	Aged	2	IBZ	1	177	19	0	0.507614
F949	Aged	2	IBZ	6	213	9	0	2.63158
F949	Aged	2	IBZ	38	154	19	0	18.0095
F949	Aged	2	IBZ	0	1	0	0	0
F949	Aged	2	IBZ	3	171	13	0	1.60428
F949	Aged	2	IBZ	23	149	7	0	12.8492
F949	Aged	2	IBZ	11	137	16	0	6.70732
F949	Aged	2	IBZ	9	155	18	0	4.94505
F949	Aged	2	IBZ	19	138	12	0	11.2426
F949	Aged	2	RZ	0	1	0	0	0
F949	Aged	2	RZ	0	1	0	0	0
F949	Aged	2	RZ	0	1	0	0	0
F949	Aged	2	RZ	0	1	0	0	0
F949	Aged	2	RZ	0	1	0	0	0
F949	Aged	2	RZ	0	89	31	0	0
F949	Aged	2	RZ	0	135	35	0	0
F949	Aged	2	RZ	0	127	29	0	0
F949	Aged	2	RZ	0	133	26	0	0
F949	Aged	2	RZ	0	116	27	0	0
F949	Aged	2	Scar	33	137	0	0	19.4118
F949	Aged	2	Scar	80	120	0	0	40
F949	Aged	2	Scar	33	158	0	0	17.2775
F949	Aged	2	Scar	36	208	0	0	14.7541
F949	Aged	2	Scar	65	223	0	0	22.5694
F949	Aged	2	Scar	25	85	0	0	22.7273
F949	Aged	2	Scar	10	140	0	0	6.66667
F949	Aged	2	Scar	14	184	0	0	7.07071
F949	Aged	2	Scar	52	115	2	0	30.7692
F949	Aged	2	Scar	41	102	0	0	28.6713
H962	Aged	2	IBZ	0	1	0	0	0
H962	Aged	2	IBZ	25	160	9	0	12.8866
H962	Aged	2	IBZ	5	227	23	0	1.96078
H962	Aged	2	IBZ	3	152	17	0	1.74419
H962	Aged	2	IBZ	9	197	21	0	3.96476
H962	Aged	2	IBZ	6	136	15	0	3.82166
H962	Aged	2	IBZ	10	172	18	0	5
H962	Aged	2	IBZ	6	225	11	0	2.47934
H962	Aged	2	IBZ	17	208	14	0	7.11297
H962	Aged	2	IBZ	5	165	17	0	2.6738
H962	Aged	2	IBZ	361	35	28	0	85.1415
H962	Aged	2	IBZ	365	19	23	0	89.6806
H962	Aged	2	RZ	0	1	0	0	0
H962	Aged	2	RZ	0	1	0	0	0
H962	Aged	2	RZ	0	1	0	0	0
H962	Aged	2	RZ	0	1	0	0	0
H962	Aged	2	RZ	0	1	0	0	0
H962	Aged	2	RZ	0	124	20	0	0
H962	Aged	2	RZ	0	135	20	0	0
H962	Aged	2	RZ	0	106	31	0	0
H962	Aged	2	RZ	0	86	18	0	0
H962	Aged	2	RZ	0	98	20	0	0
H962	Aged	2	Scar	26	45	0	0	36.6197
H962	Aged	2	Scar	24	205	0	0	10.4803
H962	Aged	2	Scar	2	164	0	0	1.20482
H962	Aged	2	Scar	62	243	0	0	20.3279
H962	Aged	2	Scar	16	138	0	0	10.3896
H962	Aged	2	Scar	42	158	0	0	21
H962	Aged	2	Scar	88	177	0	0	33.2075
H962	Aged	2	Scar	102	196	0	0	34.2282
H962	Aged	2	Scar	52	110	0	0	32.0988
H962	Aged	2	Scar	23	143	0	0	13.8554
F427	Aged	3	IBZ	0	1	0	0	0
F427	Aged	3	IBZ	0	1	0	0	0
F427	Aged	3	IBZ	0	1	0	0	0
F427	Aged	3	IBZ	0	1	0	0	0
F427	Aged	3	IBZ	3	107	4	0	2.63158
F427	Aged	3	IBZ	4	276	34	0	1.27389
F427	Aged	3	IBZ	12	352	16	0	3.15789
F427	Aged	3	IBZ	2	364	18	0	0.520833
F427	Aged	3	IBZ	0	284	13	0	0
F427	Aged	3	IBZ	3	238	11	0	1.19048
F427	Aged	3	RZ	0	1	0	0	0
F427	Aged	3	RZ	0	1	0	0	0
F427	Aged	3	RZ	0	1	0	0	0
F427	Aged	3	RZ	0	1	0	0	0
F427	Aged	3	RZ	0	1	0	0	0
F427	Aged	3	RZ	0	169	42	0	0
F427	Aged	3	RZ	0	177	38	0	0
F427	Aged	3	RZ	0	141	37	0	0
F427	Aged	3	RZ	1	136	40	0	0.564972
F427	Aged	3	RZ	0	183	37	0	0
F427	Aged	3	Scar	46	139	0	0	24.8649
F427	Aged	3	Scar	21	189	0	0	10
F427	Aged	3	Scar	43	42	0	0	50.5882
F427	Aged	3	Scar	34	47	0	0	41.9753
F427	Aged	3	Scar	6	124	0	0	4.61538
F427	Aged	3	Scar	59	193	1	0	23.3202
F427	Aged	3	Scar	60	139	0	0	30.1508
F427	Aged	3	Scar	52	162	0	0	24.2991
F427	Aged	3	Scar	98	282	0	0	25.7895
F427	Aged	3	Scar	47	266	0	0	15.016
R053	Aged	3	IBZ	4	85	10	0	4.0404
R053	Aged	3	IBZ	4	84	4	0	4.34783
R053	Aged	3	IBZ	2	77	8	0	2.29885
R053	Aged	3	IBZ	7	77	11	0	7.36842
R053	Aged	3	IBZ	3	94	12	0	2.75229
R053	Aged	3	IBZ	5	115	12	0	3.78788
R053	Aged	3	IBZ	1	144	15	0	0.625
R053	Aged	3	IBZ	6	160	10	0	3.40909
R053	Aged	3	IBZ	9	154	11	0	5.17241
R053	Aged	3	IBZ	8	156	13	0	4.51977
R053	Aged	3	RZ	0	1	0	0	0
R053	Aged	3	RZ	0	1	0	0	0
R053	Aged	3	RZ	0	1	0	0	0
R053	Aged	3	RZ	0	1	0	0	0
R053	Aged	3	RZ	0	1	0	0	0
R053	Aged	3	RZ	0	85	31	0	0
R053	Aged	3	RZ	0	128	30	0	0
R053	Aged	3	RZ	0	183	37	0	0
R053	Aged	3	RZ	0	124	30	0	0
R053	Aged	3	RZ	0	78	25	0	0
R053	Aged	3	Scar	7	60	0	0	10.4478
R053	Aged	3	Scar	3	112	0	0	2.6087
R053	Aged	3	Scar	13	133	0	0	8.90411
R053	Aged	3	Scar	2	87	0	0	2.24719
R053	Aged	3	Scar	7	93	0	0	7
R053	Aged	3	Scar	6	177	0	0	3.27869
R053	Aged	3	Scar	7	212	0	0	3.19635
R053	Aged	3	Scar	14	208	0	0	6.30631
R053	Aged	3	Scar	3	189	0	0	1.5625
R053	Aged	3	Scar	71	200	0	0	26.1993
R126	Aged	3	IBZ	0	1	0	0	0
R126	Aged	3	IBZ	1	106	16	0	0.813008
R126	Aged	3	IBZ	2	86	9	0	2.06186
R126	Aged	3	IBZ	1	86	11	0	1.02041
R126	Aged	3	IBZ	0	1	0	0	0
R126	Aged	3	IBZ	3	328	28	0	0.835655
R126	Aged	3	IBZ	1	299	12	0	0.320513
R126	Aged	3	IBZ	0	222	10	0	0
R126	Aged	3	IBZ	13	211	22	0	5.28455
R126	Aged	3	IBZ	1	201	19	0	0.452489
R126	Aged	3	IBZ	193	50	21	0	73.1061
R126	Aged	3	RZ	0	1	0	0	0
R126	Aged	3	RZ	0	1	0	0	0
R126	Aged	3	RZ	0	1	0	0	0
R126	Aged	3	RZ	0	1	0	0	0
R126	Aged	3	RZ	0	1	0	0	0
R126	Aged	3	RZ	0	183	23	0	0
R126	Aged	3	RZ	5	156	18	0	2.7933
R126	Aged	3	RZ	0	178	20	0	0
R126	Aged	3	RZ	0	173	21	0	0
R126	Aged	3	RZ	1	169	22	0	0.520833
R126	Aged	3	Scar	7	91	0	0	7.14286
R126	Aged	3	Scar	12	114	0	0	9.52381
R126	Aged	3	Scar	9	59	0	0	13.2353
R126	Aged	3	Scar	17	50	0	0	25.3731
R126	Aged	3	Scar	31	80	0	0	27.9279
R126	Aged	3	Scar	13	242	0	0	5.09804
R126	Aged	3	Scar	73	149	0	0	32.8829
R126	Aged	3	Scar	10	247	0	0	3.89105
R126	Aged	3	Scar	19	126	0	0	13.1034
R126	Aged	3	Scar	5	156	0	0	3.10559
R4304	Aged	3	IBZ	26	82	7	0	22.6087
R4304	Aged	3	IBZ	41	83	7	0	31.2977
R4304	Aged	3	IBZ	51	88	7	0	34.9315
R4304	Aged	3	IBZ	12	114	13	0	8.63309
R4304	Aged	3	IBZ	69	61	9	0	49.6403
R4304	Aged	3	IBZ	65	137	7	0	31.1005
R4304	Aged	3	IBZ	58	85	6	0	38.9262
R4304	Aged	3	IBZ	43	94	13	0	28.6667
R4304	Aged	3	IBZ	60	139	7	0	29.1262
R4304	Aged	3	IBZ	27	104	14	0	18.6207
R4304	Aged	3	RZ	0	1	0	0	0
R4304	Aged	3	RZ	0	1	0	0	0
R4304	Aged	3	RZ	0	1	0	0	0
R4304	Aged	3	RZ	7	54	0	0	11.4754
R4304	Aged	3	RZ	0	1	0	0	0
R4304	Aged	3	RZ	2	75	27	0	1.92308
R4304	Aged	3	RZ	0	115	25	0	0
R4304	Aged	3	RZ	3	126	23	0	1.97368
R4304	Aged	3	RZ	0	91	21	0	0
R4304	Aged	3	RZ	3	177	19	0	1.50754
R4304	Aged	3	Scar	42	54	0	0	43.75
R4304	Aged	3	Scar	4	83	0	0	4.5977
R4304	Aged	3	Scar	26	65	0	0	28.5714
R4304	Aged	3	Scar	47	118	0	0	28.4848
R4304	Aged	3	Scar	39	61	0	0	39
R4304	Aged	3	Scar	81	103	0	0	44.0217
R4304	Aged	3	Scar	77	150	0	0	33.9207
R4304	Aged	3	Scar	76	93	0	0	44.9704
R4304	Aged	3	Scar	52	100	0	0	34.2105
R4304	Aged	3	Scar	29	125	0	0	18.8312
R4304	Aged	3	Scar	213	26	0	0	89.1213
R485	Aged	3	IBZ	0	243	11	0	0
R485	Aged	3	IBZ	0	245	18	0	0
R485	Aged	3	IBZ	2	268	10	0	0.714286
R485	Aged	3	IBZ	0	260	18	0	0
R485	Aged	3	IBZ	46	228	14	0	15.9722
R485	Aged	3	RZ	4	186	34	0	1.78571
R485	Aged	3	RZ	17	153	36	0	8.25243
R485	Aged	3	RZ	10	148	32	0	5.26316
R485	Aged	3	RZ	2	137	28	0	1.1976
R485	Aged	3	RZ	24	169	34	0	10.5727
R485	Aged	3	Scar	32	95	0	0	25.1969
R485	Aged	3	Scar	25	155	0	0	13.8889
R485	Aged	3	Scar	58	139	0	0	29.4416
R485	Aged	3	Scar	26	245	0	0	9.5941
R485	Aged	3	Scar	11	268	0	0	3.94265
X227	Aged	3	IBZ	7	248	21	0	2.53623
X227	Aged	3	IBZ	9	219	17	0	3.67347
X227	Aged	3	IBZ	34	198	12	0	13.9344
X227	Aged	3	IBZ	24	179	9	0	11.3208
X227	Aged	3	IBZ	7	228	11	0	2.84553
X227	Aged	3	IBZ	46	147	6	0	23.1156
X227	Aged	3	IBZ	39	159	6	0	19.1176
X227	Aged	3	IBZ	66	125	16	0	31.8841
X227	Aged	3	IBZ	69	124	13	0	33.4951
X227	Aged	3	IBZ	65	162	7	0	27.7778
X227	Aged	3	RZ	0	1	0	0	0
X227	Aged	3	RZ	0	1	0	0	0
X227	Aged	3	RZ	0	1	0	0	0
X227	Aged	3	RZ	0	1	0	0	0
X227	Aged	3	RZ	0	1	0	0	0
X227	Aged	3	RZ	0	209	30	0	0
X227	Aged	3	RZ	13	197	31	0	5.39419
X227	Aged	3	RZ	0	207	30	0	0
X227	Aged	3	RZ	0	251	35	0	0
X227	Aged	3	RZ	6	239	26	0	2.21402
X227	Aged	3	Scar	43	175	0	0	19.7248
X227	Aged	3	Scar	34	221	0	0	13.3333
X227	Aged	3	Scar	46	271	0	0	14.511
X227	Aged	3	Scar	34	187	0	0	15.3846
X227	Aged	3	Scar	21	320	0	0	6.15836
X227	Aged	3	Scar	86	114	0	0	43
X227	Aged	3	Scar	169	220	0	0	43.4447
X227	Aged	3	Scar	115	225	0	0	33.8235
X227	Aged	3	Scar	65	206	0	0	23.9852
X227	Aged	3	Scar	144	88	0	0	62.069
B1149	Aged	12	IBZ	3	96	8	0	2.80374
B1149	Aged	12	IBZ	5	78	8	0	5.49451
B1149	Aged	12	IBZ	6	153	18	0	3.38983
B1149	Aged	12	IBZ	6	153	18	0	3.38983
B1149	Aged	12	IBZ	4	136	21	0	2.48447
B1149	Aged	12	IBZ	4	136	21	0	2.48447
B1149	Aged	12	IBZ	3	209	26	0	1.2605
B1149	Aged	12	IBZ	3	209	26	0	1.2605
B1149	Aged	12	IBZ	6	187	10	0	2.95567
B1149	Aged	12	IBZ	6	187	10	0	2.95567
B1149	Aged	12	IBZ	1	139	25	0	0.606061
B1149	Aged	12	IBZ	1	139	25	0	0.606061
B1149	Aged	12	IBZ	80	197	23	0	26.6667
B1149	Aged	12	IBZ	80	197	23	0	26.6667
B1149	Aged	12	RZ	0	1	0	0	0
B1149	Aged	12	RZ	0	1	0	0	0
B1149	Aged	12	RZ	0	1	0	0	0
B1149	Aged	12	RZ	2	49	0	0	3.92157
B1149	Aged	12	RZ	0	1	0	0	0
B1149	Aged	12	RZ	0	126	57	0	0
B1149	Aged	12	RZ	0	135	50	0	0
B1149	Aged	12	RZ	0	113	67	0	0
B1149	Aged	12	RZ	0	88	70	0	0
B1149	Aged	12	RZ	0	128	60	0	0
B1149	Aged	12	Scar	139	166	0	0	45.5738
B1149	Aged	12	Scar	139	116	0	0	54.5098
B1149	Aged	12	Scar	80	236	0	0	25.3165
B1149	Aged	12	Scar	80	236	0	0	25.3165
B1149	Aged	12	Scar	75	180	0	0	29.4118
B1149	Aged	12	Scar	75	180	0	0	29.4118
B1149	Aged	12	Scar	58	255	0	0	18.5304
B1149	Aged	12	Scar	58	255	0	0	18.5304
B1149	Aged	12	Scar	97	190	0	0	33.7979
B1149	Aged	12	Scar	97	189	0	0	33.9161
B1149	Aged	12	Scar	119	97	0	0	55.0926
B1149	Aged	12	Scar	72	157	0	0	31.441
B1149	Aged	12	Scar	74	255		0	22.4924
B1149	Aged	12	Scar	60	162		0	27.027
B1149	Aged	12	Scar	23	105		0	17.9688
B1149	Aged	12	Scar	53	132		0	28.6486
B1149	Aged	12	Scar	45	178		0	20.1794
B1149	Aged	12	Scar	96	109		0	46.8293
B1149	Aged	12	Scar	53	115		0	31.5476
B1149	Aged	12	Scar	90	96		0	48.3871
B1149	Aged	12	IBZ	6	152	27	0	3.24324
B1149	Aged	12	IBZ	4	153	19	1	2.82486
B1149	Aged	12	IBZ	6	126	14	0	4.10959
B1149	Aged	12	IBZ	19	163	17	3	10.8911
B1149	Aged	12	IBZ	3	146	20	4	4.04624
B1149	Aged	12	IBZ	5	138	19	0	3.08642
B1149	Aged	12	IBZ	10	190	19	2	5.42986
B1149	Aged	12	IBZ	19	142	28	1	10.5263
B1149	Aged	12	IBZ	3	122	46	1	2.32558
B1149	Aged	12	IBZ	4	170	21	0	2.05128
B1149	Aged	12	RZ	0	1		0	0
B1149	Aged	12	RZ	0	1		0	0
B1149	Aged	12	RZ	0	1		0	0
B1149	Aged	12	RZ	0	1		0	0
B1149	Aged	12	RZ	0	1		0	0
B1149	Aged	12	RZ	0	1		0	0
B1149	Aged	12	RZ	0	1		0	0
B1149	Aged	12	RZ	0	49	55	1	0.952381
B1149	Aged	12	RZ	0	1		0	0
B1149	Aged	12	RZ	0	1		0	0
F894	Aged	12	IBZ	0	1	0	0	0
F894	Aged	12	IBZ	0	1	0	0	0
F894	Aged	12	IBZ	0	1	0	0	0
F894	Aged	12	IBZ	1	96	17	0	0.877193
F894	Aged	12	IBZ	0	1	0	0	0
F894	Aged	12	IBZ	0	161	26	0	0
F894	Aged	12	IBZ	0	155	10	0	0
F894	Aged	12	IBZ	5	148	20	0	2.89017
F894	Aged	12	IBZ	8	230	15	0	3.16206
F894	Aged	12	IBZ	0	169	31	0	0
F894	Aged	12	IBZ	48	157	12	0	22.1198
F894	Aged	12	RZ	0	1	0	0	0
F894	Aged	12	RZ	0	1	0	0	0
F894	Aged	12	RZ	1	58	0	0	1.69492
F894	Aged	12	RZ	0	1	0	0	0
F894	Aged	12	RZ	0	1	0	0	0
F894	Aged	12	RZ	2	25	48	0	2.66667
F894	Aged	12	RZ	10	84	33	0	7.87402
F894	Aged	12	RZ	0	128	35	0	0
F894	Aged	12	RZ	0	59	23	0	0
F894	Aged	12	RZ	1	101	39	0	0.70922
F894	Aged	12	Scar	0	1	0	0	0
F894	Aged	12	Scar	1	61	0	0	1.6129
F894	Aged	12	Scar	5	78	0	0	6.0241
F894	Aged	12	Scar	8	142	0	0	5.33333
F894	Aged	12	Scar	0	1	0	0	0
F894	Aged	12	Scar	7	154	0	0	4.34783
F894	Aged	12	Scar	1	92	0	0	1.07527
F894	Aged	12	Scar	3	139	0	0	2.11268
F894	Aged	12	Scar	14	118	0	0	10.6061
F894	Aged	12	Scar	3	132	0	0	2.22222
F894	Aged	12	Scar	70	106	0	0	39.7727
F894	Aged	12	Scar	83	53	0	0	61.0294
F894	Aged	12	Scar	110	131	0	0	45.6432
F894	Aged	12	Scar	147	101	0	0	59.2742
F894	Aged	12	Scar	111	90	0	0	55.2239
F894	Aged	12	Scar	89	153	0	0	36.7769
F985	Aged	12	IBZ	0	1	0	0	0
F985	Aged	12	IBZ	0	1	0	0	0
F985	Aged	12	IBZ	7	98	10	0	6.08696
F985	Aged	12	IBZ	4	112	10	0	3.1746
F985	Aged	12	IBZ	12	58	4	0	16.2162
F985	Aged	12	IBZ	0	1		0	0
F985	Aged	12	IBZ	0	1		0	0
F985	Aged	12	IBZ	5	283	23	0	1.60772
F985	Aged	12	IBZ	7	331	14	0	1.98864
F985	Aged	12	IBZ	4	278	8	0	1.37931
F985	Aged	12	RZ	0	1	0	0	0
F985	Aged	12	RZ	0	1	0	0	0
F985	Aged	12	RZ	0	1	0	0	0
F985	Aged	12	RZ	0	1	0	0	0
F985	Aged	12	RZ	0	1	0	0	0
F985	Aged	12	RZ	0	1		0	0
F985	Aged	12	RZ	0	1		0	0
F985	Aged	12	RZ	0	1		0	0
F985	Aged	12	RZ	0	1		0	0
F985	Aged	12	RZ	0	1		0	0
F985	Aged	12	Scar	5	51	0	0	8.92857
F985	Aged	12	Scar	0	1	0	0	0
F985	Aged	12	Scar	0	1	0	0	0
F985	Aged	12	Scar	8	72	0	0	10
F985	Aged	12	Scar	0	1	0	0	0
F985	Aged	12	Scar	48	364	0	0	11.6505
F985	Aged	12	Scar	44	234	0	0	15.8273
F985	Aged	12	Scar	51	281	0	0	15.3614
F985	Aged	12	Scar	16	233	0	0	6.4257
F985	Aged	12	Scar	16	227	0	0	6.58436
F985	Aged	12	Scar	66	170	0	0	27.9661
F985	Aged	12	Scar	66	111	0	0	37.2881
F985	Aged	12	Scar	37	133	0	0	21.7647
S1165	Aged	12	IBZ	4	77	6	0	4.5977
S1165	Aged	12	IBZ	6	69	6	0	7.40741
S1165	Aged	12	IBZ	6	76	9	0	6.59341
S1165	Aged	12	IBZ	11	43	5	0	18.6441
S1165	Aged	12	IBZ	0	1	0	0	0
S1165	Aged	12	IBZ	5	288	40	0	1.5015
S1165	Aged	12	IBZ	16	211	25	0	6.34921
S1165	Aged	12	IBZ	4	194	19	0	1.84332
S1165	Aged	12	IBZ	28	110	26	0	17.0732
S1165	Aged	12	IBZ	2	225	14	0	0.829876
S1165	Aged	12	RZ	0	1	0	0	0
S1165	Aged	12	RZ	1	31	0	0	3.125
S1165	Aged	12	RZ	0	1	0	0	0
S1165	Aged	12	RZ	2	33	0	0	5.71429
S1165	Aged	12	RZ	3	21	0	0	12.5
S1165	Aged	12	RZ	3	80	45	0	2.34375
S1165	Aged	12	RZ	0	1		0	0
S1165	Aged	12	RZ	1	67	38	0	0.943396
S1165	Aged	12	RZ	2	108	40	0	1.33333
S1165	Aged	12	RZ	0	1		0	0
S1165	Aged	12	Scar	42	40	0	0	51.2195
S1165	Aged	12	Scar	26	74	0	0	26
S1165	Aged	12	Scar	38	34	0	0	52.7778
S1165	Aged	12	Scar	13	52	0	0	20
S1165	Aged	12	Scar	31	91	0	0	25.4098
S1165	Aged	12	Scar	145	130	0	0	52.7273
S1165	Aged	12	Scar	146	175	0	0	45.4829
S1165	Aged	12	Scar	131	137	0	0	48.8806
S1165	Aged	12	Scar	121	135	0	0	47.2656
S1165	Aged	12	Scar	129	151	0	0	46.0714
5001	Young	1	IBZ	9	188	13	0	4.28571
5001	Young	1	IBZ	7	217	18	0	2.89256
5001	Young	1	IBZ	45	157	4	0	21.8447
5001	Young	1	IBZ	0	1	0	0	0
5001	Young	1	IBZ	8	177	9	0	4.12371
5001	Young	1	IBZ	74	58	9	0	52.4823
5001	Young	1	IBZ	64	70	14	0	43.2432
5001	Young	1	IBZ	1	155	15	0	0.584795
5001	Young	1	IBZ	3	128	16	0	2.04082
5001	Young	1	IBZ	13	138	13	0	7.92683
5001	Young	1	RZ	0	1	0	0	0
5001	Young	1	RZ	0	1	0	0	0
5001	Young	1	RZ	0	1	0	0	0
5001	Young	1	RZ	0	1	0	0	0
5001	Young	1	RZ	0	1	0	0	0
5001	Young	1	RZ	0	73	21	0	0
5001	Young	1	RZ	0	62	21	0	0
5001	Young	1	RZ	0	77	26	0	0
5001	Young	1	RZ	0	79	36	0	0
5001	Young	1	RZ	0	80	29	0	0
5001	Young	1	Scar	37	293	0	0	11.2121
5001	Young	1	Scar	67	129	0	0	34.1837
5001	Young	1	Scar	64	319	0	0	16.7102
5001	Young	1	Scar	19	248	0	0	7.1161
5001	Young	1	Scar	122	184	0	0	39.8693
5001	Young	1	Scar	22	136	0	0	13.9241
5001	Young	1	Scar	23	135	0	0	14.557
5001	Young	1	Scar	50	148	0	0	25.2525
5001	Young	1	Scar	35	136	0	0	20.4678
5001	Young	1	Scar	27	173	0	0	13.5
D212	Young	1	IBZ	0	1	0	0	0
D212	Young	1	IBZ	3	149	5	0	1.91083
D212	Young	1	IBZ	0	1	0	0	0
D212	Young	1	IBZ	0	1	0	0	0
D212	Young	1	IBZ	2	59	69	0	1.53846
D212	Young	1	IBZ	12	161	15	0	6.38298
D212	Young	1	IBZ	2	181	22	0	0.97561
D212	Young	1	IBZ	13	205	16	0	5.55556
D212	Young	1	IBZ	6	198	11	0	2.7907
D212	Young	1	IBZ	16	195	7	0	7.33945
D212	Young	1	IBZ	145	68	24	0	61.1814
D212	Young	1	IBZ	138	7	28	0	79.7688
D212	Young	1	RZ	0	1	0	0	0
D212	Young	1	RZ	0	1	0	0	0
D212	Young	1	RZ	0	1	0	0	0
D212	Young	1	RZ	0	1	0	0	0
D212	Young	1	RZ	0	1	0	0	0
D212	Young	1	RZ	0	78	96	0	0
D212	Young	1	RZ	0	146	93	0	0
D212	Young	1	RZ	0	164	116	0	0
D212	Young	1	RZ	0	132	101	0	0
D212	Young	1	RZ	0	206	105	0	0
D212	Young	1	Scar	6	195	0	0	2.98507
D212	Young	1	Scar	23	120	0	0	16.0839
D212	Young	1	Scar	14	171	0	0	7.56757
D212	Young	1	Scar	11	160	0	0	6.43275
D212	Young	1	Scar	7	163	0	0	4.11765
D212	Young	1	Scar	62	348	0	0	15.122
D212	Young	1	Scar	20	295	0	0	6.34921
D212	Young	1	Scar	27	238	0	0	10.1887
D212	Young	1	Scar	53	191	0	0	21.7213
D212	Young	1	Scar	15	319	0	0	4.49102
D216	Young	1	IBZ	21	91	7	0	17.6471
D216	Young	1	IBZ	10	164	13	0	5.34759
D216	Young	1	IBZ	39	149	7	0	20
D216	Young	1	IBZ	25	90	9	0	20.1613
D216	Young	1	IBZ	41	110	15	0	24.6988
D216	Young	1	RZ	0	1	0	0	0
D216	Young	1	RZ	0	1	0	0	0
D216	Young	1	RZ	0	1	0	0	0
D216	Young	1	RZ	0	1	0	0	0
D216	Young	1	RZ	0	1	0	0	0
D216	Young	1	RZ	4	79	21	0	3.84615
D216	Young	1	RZ	9	123	23	0	5.80645
D216	Young	1	RZ	6	120	19	0	4.13793
D216	Young	1	RZ	13	42	27	0	15.8537
D216	Young	1	RZ	1	80	27	0	0.925926
D216	Young	1	Scar	75	95	0	0	44.1176
D216	Young	1	Scar	23	119	0	0	16.1972
D216	Young	1	Scar	40	115	0	0	25.8065
D216	Young	1	Scar	57	101	0	0	36.0759
D216	Young	1	Scar	56	85	0	0	39.7163
D216	Young	1	Scar	31	203	0	0	13.2479
D216	Young	1	Scar	44	188	0	0	18.9655
D216	Young	1	Scar	50	153	0	0	24.6305
D216	Young	1	Scar	29	237	0	0	10.9023
D216	Young	1	Scar	49	82	0	0	37.4046
X103	Young	1	IBZ	0	1	0	0	0
X103	Young	1	IBZ	0	1	0	0	0
X103	Young	1	IBZ	1	238	21	0	0.384615
X103	Young	1	IBZ	0	1	0	0	0
X103	Young	1	IBZ	0	1	0	0	0
X103	Young	1	IBZ	7	253	10	0	2.59259
X103	Young	1	IBZ	2	149	10	0	1.24224
X103	Young	1	IBZ	0	203	12	0	0
X103	Young	1	IBZ	0	175	21	0	0
X103	Young	1	IBZ	19	118	10	0	12.9252
X103	Young	1	RZ	0	1	0	0	0
X103	Young	1	RZ	0	1	0	0	0
X103	Young	1	RZ	0	1	0	0	0
X103	Young	1	RZ	0	1	0	0	0
X103	Young	1	RZ	0	1	0	0	0
X103	Young	1	RZ	0	180	25	0	0
X103	Young	1	RZ	0	149	32	0	0
X103	Young	1	RZ	0	243	33	0	0
X103	Young	1	RZ	0	162	40	0	0
X103	Young	1	RZ	0	130	36	0	0
X103	Young	1	Scar	6	290	0	0	2.02703
X103	Young	1	Scar	8	263	0	0	2.95203
X103	Young	1	Scar	0	1	0	0	0
X103	Young	1	Scar	2	323	0	0	0.615385
X103	Young	1	Scar	0	1	0	0	0
X103	Young	1	Scar	5	415	0	0	1.19048
X103	Young	1	Scar	0	314	0	0	0
X103	Young	1	Scar	10	292	4	0	3.26797
X103	Young	1	Scar	0	201	0	0	0
X103	Young	1	Scar	7	272	0	0	2.50896
5043	Young	2	IBZ	23	151	22	0	11.7347
5043	Young	2	IBZ	35	241	15	0	12.0275
5043	Young	2	IBZ	7	240	17	0	2.65152
5043	Young	2	IBZ	0	1	0	0	0
5043	Young	2	IBZ	5	214	10	0	2.18341
5043	Young	2	IBZ	19	104	17	0	13.5714
5043	Young	2	IBZ	1	135	12	0	0.675676
5043	Young	2	IBZ	15	98	21	0	11.194
5043	Young	2	IBZ	10	242	18	0	3.7037
5043	Young	2	IBZ	5	138	13	0	3.20513
5043	Young	2	RZ	0	1	0	0	0
5043	Young	2	RZ	0	1	0	0	0
5043	Young	2	RZ	0	1	0	0	0
5043	Young	2	RZ	0	1	0	0	0
5043	Young	2	RZ	0	1	0	0	0
5043	Young	2	RZ	0	115	32	0	0
5043	Young	2	RZ	1	183	41	0	0.444444
5043	Young	2	RZ	1	107	35	0	0.699301
5043	Young	2	RZ	0	144	24	0	0
5043	Young	2	RZ	0	162	50	0	0
5043	Young	2	Scar	34	280	0	0	10.828
5043	Young	2	Scar	31	221	0	0	12.3016
5043	Young	2	Scar	7	216	0	0	3.13901
5043	Young	2	Scar	9	220	0	0	3.93013
5043	Young	2	Scar	38	261	0	0	12.709
5043	Young	2	Scar	15	236	0	0	5.9761
5043	Young	2	Scar	36	171	0	0	17.3913
5043	Young	2	Scar	18	271	0	0	6.22837
5043	Young	2	Scar	14	176	0	0	7.36842
5043	Young	2	Scar	13	176	0	0	6.87831
D218	Young	2	IBZ	1	199	15	0	0.465116
D218	Young	2	IBZ	0	1	0	0	0
D218	Young	2	IBZ	0	1	0	0	0
D218	Young	2	IBZ	2	181	22	0	0.97561
D218	Young	2	IBZ	0	1	0	0	0
D218	Young	2	IBZ	1	213	27	0	0.414938
D218	Young	2	IBZ	3	164	16	0	1.63934
D218	Young	2	IBZ	4	287	16	0	1.30293
D218	Young	2	IBZ	2	280	13	0	0.677966
D218	Young	2	IBZ	6	318	10	0	1.79641
D218	Young	2	RZ	0	1	0	0	0
D218	Young	2	RZ	0	1	0	0	0
D218	Young	2	RZ	0	1	0	0	0
D218	Young	2	RZ	0	1	0	0	0
D218	Young	2	RZ	0	1	0	0	0
D218	Young	2	RZ	0	160	45	0	0
D218	Young	2	RZ	0	196	35	0	0
D218	Young	2	RZ	0	216	50	0	0
D218	Young	2	RZ	0	196	35	0	0
D218	Young	2	RZ	0	166	40	0	0
D218	Young	2	Scar	7	238	0	0	2.85714
D218	Young	2	Scar	45	127	0	0	26.1628
D218	Young	2	Scar	8	161	0	0	4.73373
D218	Young	2	Scar	26	191	0	0	11.9816
D218	Young	2	Scar	8	213	0	0	3.61991
D218	Young	2	Scar	13	274	0	0	4.52962
D218	Young	2	Scar	25	269	0	0	8.5034
D218	Young	2	Scar	12	248	0	0	4.61538
D218	Young	2	Scar	24	248	0	0	8.82353
D218	Young	2	Scar	15	288	0	0	4.9505
X115	Young	2	IBZ	13	110	8	0	9.92366
X115	Young	2	IBZ	6	150	8	0	3.65854
X115	Young	2	IBZ	9	84	11	0	8.65385
X115	Young	2	IBZ	8	90	7	0	7.61905
X115	Young	2	IBZ	3	87	7	0	3.09278
X115	Young	2	RZ	0	1	0	0	0
X115	Young	2	RZ	0	1	0	0	0
X115	Young	2	RZ	0	1	0	0	0
X115	Young	2	RZ	0	1	0	0	0
X115	Young	2	RZ	0	1	0	0	0
X115	Young	2	Scar	61	40	0	0	60.396
X115	Young	2	Scar	64	95	0	0	40.2516
X115	Young	2	Scar	59	71	0	0	45.3846
X115	Young	2	Scar	86	43	0	0	66.6667
X115	Young	2	Scar	6	113	0	0	5.04202
X245	Young	2	IBZ	30	209	18	0	11.6732
X245	Young	2	IBZ	51	149	17	0	23.5023
X245	Young	2	IBZ	45	275	12	0	13.5542
X245	Young	2	IBZ	3	116	12	0	2.29008
X245	Young	2	IBZ	16	263	8	0	5.57491
X245	Young	2	IBZ	32	198	13	0	13.1687
X245	Young	2	IBZ	38	218	12	0	14.1791
X245	Young	2	IBZ	30	220	14	0	11.3636
X245	Young	2	IBZ	26	177	16	0	11.8721
X245	Young	2	IBZ	16	150	11	0	9.03955
X245	Young	2	IBZ	204	21	18	0	83.9506
X245	Young	2	RZ	0	1	0	0	0
X245	Young	2	RZ	0	1	0	0	0
X245	Young	2	RZ	0	1	0	0	0
X245	Young	2	RZ	0	1	0	0	0
X245	Young	2	RZ	0	1	0	0	0
X245	Young	2	RZ	0	133	32	0	0
X245	Young	2	RZ	0	146	25	0	0
X245	Young	2	RZ	1	108	24	0	0.75188
X245	Young	2	RZ	0	174	58	0	0
X245	Young	2	RZ	0	119	32	0	0
X245	Young	2	Scar	23	249	0	0	8.45588
X245	Young	2	Scar	40	110	0	0	26.6667
X245	Young	2	Scar	46	165	0	0	21.8009
X245	Young	2	Scar	16	288	0	0	5.26316
X245	Young	2	Scar	66	160	0	0	29.2035
X245	Young	2	Scar	20	216	0	0	8.47458
X245	Young	2	Scar	73	125	0	0	36.8687
X245	Young	2	Scar	28	373	0	0	6.98254
X245	Young	2	Scar	21	327	0	0	6.03448
X245	Young	2	Scar	23	308	0	0	6.94864
X247	Young	2	IBZ	6	131	14	0	3.97351
X247	Young	2	IBZ	0	1	0	0	0
X247	Young	2	IBZ	5	165	14	0	2.71739
X247	Young	2	IBZ	2	169	11	0	1.0989
X247	Young	2	IBZ	0	1	0	0	0
X247	Young	2	IBZ	6	176	16	0	3.0303
X247	Young	2	IBZ	24	120	11	0	15.4839
X247	Young	2	IBZ	7	213	13	0	3.00429
X247	Young	2	IBZ	1	190	9	0	0.5
X247	Young	2	IBZ	4	270	10	0	1.40845
X247	Young	2	IBZ	189	64	10	0	71.8631
X247	Young	2	IBZ	151	52	14	0	69.5853
X247	Young	2	RZ	0	1	0	0	0
X247	Young	2	RZ	0	1	0	0	0
X247	Young	2	RZ	0	1	0	0	0
X247	Young	2	RZ	0	1	0	0	0
X247	Young	2	RZ	0	1	0	0	0
X247	Young	2	RZ	0	104	48	0	0
X247	Young	2	RZ	0	114	42	0	0
X247	Young	2	RZ	0	128	66	0	0
X247	Young	2	RZ	0	156	59	0	0
X247	Young	2	RZ	0	136	62	0	0
X247	Young	2	Scar	13	251	0	0	4.92424
X247	Young	2	Scar	10	153	0	0	6.13497
X247	Young	2	Scar	11	141	0	0	7.23684
X247	Young	2	Scar	2	193	0	0	1.02564
X247	Young	2	Scar	8	169	0	0	4.51977
X247	Young	2	Scar	71	155	0	0	31.4159
X247	Young	2	Scar	53	243	0	0	17.9054
X247	Young	2	Scar	35	134	0	0	20.7101
X247	Young	2	Scar	14	128	0	0	9.85915
X247	Young	2	Scar	34	144	0	0	19.1011
X247	Young	2	Scar	191	109	0	0	63.6667
3871	Young	3	Scar	0	1		0	0
3871	Young	3	Scar	0	1		0	0
3871	Young	3	Scar	0	1		0	0
3871	Young	3	Scar	3	239	0	0	1.23967
3871	Young	3	Scar	0	1		0	0
3871	Young	3	Scar	0	1		0	0
3871	Young	3	Scar	2	185	0	0	1.06952
3871	Young	3	Scar	0	1		0	0
3871	Young	3	Scar	0	1		0	0
3871	Young	3	Scar	2	101	0	0	1.94175
3871	Young	3	IBZ	0	1		0	0
3871	Young	3	IBZ	1	209	25	0	0.425532
3871	Young	3	IBZ	0	1		0	0
3871	Young	3	IBZ	0	1		0	0
3871	Young	3	IBZ	3	158	17	0	1.68539
3871	Young	3	IBZ	0	1		0	0
3871	Young	3	IBZ	0	1		0	0
3871	Young	3	IBZ	0	1		0	0
3871	Young	3	IBZ	0	1		0	0
3871	Young	3	IBZ	2	301	9	0	0.641026
3871	Young	3	RZ	0	1		0	0
3871	Young	3	RZ	0	1		0	0
3871	Young	3	RZ	0	1		0	0
3871	Young	3	RZ	0	1		0	0
3871	Young	3	RZ	0	1		0	0
3871	Young	3	RZ	0	1		0	0
3871	Young	3	RZ	0	1		0	0
3871	Young	3	RZ	0	1		0	0
3871	Young	3	RZ	0	1		0	0
3871	Young	3	RZ	0	1		0	0
X104	Young	3	IBZ	0	1	0	0	0
X104	Young	3	IBZ	0	1	0	0	0
X104	Young	3	IBZ	0	1	0	0	0
X104	Young	3	IBZ	0	1	0	0	0
X104	Young	3	IBZ	0	1	0	0	0
X104	Young	3	IBZ	1	256	22	0	0.358423
X104	Young	3	IBZ	1	220	14	0	0.425532
X104	Young	3	IBZ	0	185	17	0	0
X104	Young	3	IBZ	0	204	10	0	0
X104	Young	3	IBZ	0	231	11	0	0
X104	Young	3	RZ	0	1	0	0	0
X104	Young	3	RZ	0	1	0	0	0
X104	Young	3	RZ	0	1	0	0	0
X104	Young	3	RZ	0	1	0	0	0
X104	Young	3	RZ	0	1	0	0	0
X104	Young	3	RZ	0	229	51	0	0
X104	Young	3	RZ	0	210	51	0	0
X104	Young	3	RZ	0	245	50	0	0
X104	Young	3	RZ	0	164	44	0	0
X104	Young	3	RZ	0	179	35	0	0
X104	Young	3	Scar	2	230	0	0	0.862069
X104	Young	3	Scar	3	310	0	0	0.958466
X104	Young	3	Scar	19	235	0	0	7.48031
X104	Young	3	Scar	8	324	0	0	2.40964
X104	Young	3	Scar	0	1	0	0	0
X104	Young	3	Scar	2	344	0	0	0.578035
X104	Young	3	Scar	0	235	0	0	0
X104	Young	3	Scar	6	233	0	0	2.51046
X104	Young	3	Scar	4	300	0	0	1.31579
X104	Young	3	Scar	0	219	0	0	0
X106	Young	3	IBZ	0	1	0	0	0
X106	Young	3	IBZ	0	1	0	0	0
X106	Young	3	IBZ	1	220	27	0	0.403226
X106	Young	3	IBZ	0	1	0	0	0
X106	Young	3	IBZ	0	1	0	0	0
X106	Young	3	IBZ	14	163	12	0	7.40741
X106	Young	3	IBZ	6	233	14	0	2.37154
X106	Young	3	IBZ	8	203	11	0	3.6036
X106	Young	3	IBZ	11	178	11	0	5.5
X106	Young	3	IBZ	13	129	15	0	8.28025
X106	Young	3	RZ	0	1	0	0	0
X106	Young	3	RZ	0	1	0	0	0
X106	Young	3	RZ	0	1	0	0	0
X106	Young	3	RZ	0	1	0	0	0
X106	Young	3	RZ	0	1	0	0	0
X106	Young	3	RZ	0	203	63	0	0
X106	Young	3	RZ	2	201	37	0	0.833333
X106	Young	3	RZ	0	182	43	0	0
X106	Young	3	RZ	0	135	30	0	0
X106	Young	3	RZ	0	127	31	0	0
X106	Young	3	Scar	0	1	0	0	0
X106	Young	3	Scar	6	265	0	0	2.21402
X106	Young	3	Scar	4	197	0	0	1.99005
X106	Young	3	Scar	19	129	0	0	12.8378
X106	Young	3	Scar	9	384	0	0	2.29008
X106	Young	3	Scar	15	210	0	0	6.66667
X106	Young	3	Scar	1	219	0	0	0.454545
X106	Young	3	Scar	0	158	0	0	0
X106	Young	3	Scar	15	312	0	0	4.58716
X106	Young	3	Scar	30	206	0	0	12.7119
X219	Young	3	IBZ	2	160	15	0	1.12994
X219	Young	3	IBZ	3	232	5	0	1.25
X219	Young	3	IBZ	1	156	8	0	0.606061
X219	Young	3	IBZ	4	218	9	0	1.7316
X219	Young	3	IBZ	0	1	0	0	0
X219	Young	3	IBZ	7	172	11	0	3.68421
X219	Young	3	IBZ	2	201	13	0	0.925926
X219	Young	3	IBZ	3	168	16	0	1.60428
X219	Young	3	IBZ	7	201	20	0	3.07018
X219	Young	3	IBZ	4	217	13	0	1.7094
X219	Young	3	RZ	0	1	0	0	0
X219	Young	3	RZ	0	1	0	0	0
X219	Young	3	RZ	0	1	0	0	0
X219	Young	3	RZ	0	1	0	0	0
X219	Young	3	RZ	0	1	0	0	0
X219	Young	3	RZ	0	184	23	0	0
X219	Young	3	RZ	0	121	25	0	0
X219	Young	3	RZ	0	174	36	0	0
X219	Young	3	RZ	0	162	28	0	0
X219	Young	3	RZ	0	149	36	0	0
X219	Young	3	Scar	3	197	0	0	1.5
X219	Young	3	Scar	24	106	0	0	18.4615
X219	Young	3	Scar	5	169	0	0	2.87356
X219	Young	3	Scar	3	187	0	0	1.57895
X219	Young	3	Scar	4	188	0	0	2.08333
X219	Young	3	Scar	34	169	0	0	16.7488
X219	Young	3	Scar	4	138	0	0	2.8169
X219	Young	3	Scar	33	207	0	0	13.75
X219	Young	3	Scar	8	323	0	0	2.41692
X219	Young	3	Scar	6	209	0	0	2.7907
X225	Young	3	IBZ	0	1		0	0
X225	Young	3	IBZ	3	453	34	0	0.612245
X225	Young	3	IBZ	0	1		0	0
X225	Young	3	IBZ	4	551	39	0	0.673401
X225	Young	3	IBZ	17	383	56	0	3.72807
X225	Young	3	IBZ	53	179	11	0	21.8107
X225	Young	3	IBZ	8	219	7	0	3.4188
X225	Young	3	IBZ	17	253	13	0	6.00707
X225	Young	3	IBZ	12	175	9	0	6.12245
X225	Young	3	IBZ	20	244	9	0	7.32601
X225	Young	3	RZ	0	1	0	0	0
X225	Young	3	RZ	0	1	0	0	0
X225	Young	3	RZ	0	1	0	0	0
X225	Young	3	RZ	0	1	0	0	0
X225	Young	3	RZ	0	1	0	0	0
X225	Young	3	RZ	0	124	23	0	0
X225	Young	3	RZ	0	199	23	0	0
X225	Young	3	RZ	0	182	24	0	0
X225	Young	3	RZ	0	208	23	0	0
X225	Young	3	RZ	0	165	22	0	0
X225	Young	3	Scar	11	645	0	0	1.67683
X225	Young	3	Scar	9	459	0	0	1.92308
X225	Young	3	Scar	0	1	0	0	0
X225	Young	3	Scar	4	494	0	0	0.803213
X225	Young	3	Scar	8	597	0	0	1.32231
X225	Young	3	Scar	11	175	0	0	5.91398
X225	Young	3	Scar	13	187	0	0	6.5
X225	Young	3	Scar	11	167	0	0	6.17978
X225	Young	3	Scar	16	213	0	0	6.9869
X225	Young	3	Scar	33	202	0	0	14.0426
X228	Young	3	Scar	0	1		0	0
X228	Young	3	Scar	8	151		0	5.03145
X228	Young	3	Scar	4	161		0	2.42424
X228	Young	3	Scar	2	105		0	1.86916
X228	Young	3	Scar	0	1		0	0
X228	Young	3	Scar	2	138		0	1.42857
X228	Young	3	Scar	0	1		0	0
X228	Young	3	Scar	0	1		0	0
X228	Young	3	Scar	9	125		0	6.71642
X228	Young	3	Scar	0	1		0	0
X228	Young	3	IBZ	2	75	34	0	1.8018
X228	Young	3	IBZ	4	71	41	2	5.08475
X228	Young	3	IBZ	2	72	44	1	2.52101
X228	Young	3	IBZ	2	94	42	0	1.44928
X228	Young	3	IBZ	3	100	22	0	2.4
X228	Young	3	IBZ	6	12	41	0	10.1695
X228	Young	3	IBZ	2	95	50	0	1.36054
X228	Young	3	IBZ	0	1		0	0
X228	Young	3	IBZ	2	97	28	0	1.5748
X228	Young	3	IBZ	0	1		0	0
X228	Young	3	RZ	0	1		0	0
X228	Young	3	RZ	0	1		0	0
X228	Young	3	RZ	0	1		0	0
X228	Young	3	RZ	0	1		0	0
X228	Young	3	RZ	0	1		0	0
X228	Young	3	RZ	0	1		0	0
X228	Young	3	RZ	0	1		0	0
X228	Young	3	RZ	0	1		0	0
X228	Young	3	RZ	0	1		0	0
X228	Young	3	RZ	0	1		0	0
X164	Young	12	IBZ	0	1	0	0	0
X164	Young	12	IBZ	0	1	0	0	0
X164	Young	12	IBZ	0	1	0	0	0
X164	Young	12	IBZ	0	1	0	0	0
X164	Young	12	IBZ	0	1	0	0	0
X164	Young	12	IBZ	0	1	0	0	0
X164	Young	12	IBZ	0	1	0	0	0
X164	Young	12	IBZ	0	1	0	0	0
X164	Young	12	IBZ	3	129	26	0	1.89873
X164	Young	12	IBZ	2	187	39	0	0.877193
X164	Young	12	RZ	0	1	0	0	0
X164	Young	12	RZ	0	1	0	0	0
X164	Young	12	RZ	0	1	0	0	0
X164	Young	12	RZ	0	1	0	0	0
X164	Young	12	RZ	0	1	0	0	0
X164	Young	12	RZ	0	1		0	0
X164	Young	12	RZ	0	1		0	0
X164	Young	12	RZ	0	1		0	0
X164	Young	12	RZ	0	1		0	0
X164	Young	12	RZ	0	1		0	0
X164	Young	12	Scar	1	70	0	0	1.40845
X164	Young	12	Scar	4	63	0	0	5.97015
X164	Young	12	Scar	6	76	0	0	7.31707
X164	Young	12	Scar	0	1	0	0	0
X164	Young	12	Scar	3	84	0	0	3.44828
X164	Young	12	Scar	5	210	0	0	2.32558
X164	Young	12	Scar	0	1	0	0	0
X164	Young	12	Scar	0	1	0	0	0
X164	Young	12	Scar	1	189	0	0	0.526316
X164	Young	12	Scar	1	218	0	0	0.456621
X203	Young	12	IBZ	0	1	0	0	0
X203	Young	12	IBZ	0	1	0	0	0
X203	Young	12	IBZ	0	1	0	0	0
X203	Young	12	IBZ	0	1	0	0	0
X203	Young	12	IBZ	2	81	13	0	2.08333
X203	Young	12	IBZ	0	1		0	0
X203	Young	12	IBZ	0	1		0	0
X203	Young	12	IBZ	0	1		0	0
X203	Young	12	IBZ	1	399	19	0	0.238663
X203	Young	12	IBZ	0	1		0	0
X203	Young	12	RZ	0	1	0	0	0
X203	Young	12	RZ	0	1	0	0	0
X203	Young	12	RZ	0	1	0	0	0
X203	Young	12	RZ	0	1	0	0	0
X203	Young	12	RZ	0	1	0	0	0
X203	Young	12	RZ	0	1		0	0
X203	Young	12	RZ	0	1		0	0
X203	Young	12	RZ	0	1		0	0
X203	Young	12	RZ	0	1		0	0
X203	Young	12	RZ	0	1		0	0
X203	Young	12	Scar	6	72	0	0	7.69231
X203	Young	12	Scar	7	47	0	0	12.963
X203	Young	12	Scar	2	44	0	0	4.34783
X203	Young	12	Scar	0	1	0	0	0
X203	Young	12	Scar	2	35	0	0	5.40541
X203	Young	12	Scar	0	1		0	0
X203	Young	12	Scar	0	1		0	0
X203	Young	12	Scar	0	1		0	0
X203	Young	12	Scar	12	501		0	2.33918
X203	Young	12	Scar	17	369		0	4.40415
X205	Young	12	IBZ	2	74	5	0	2.46914
X205	Young	12	IBZ	0	1	0	0	0
X205	Young	12	IBZ	0	1	0	0	0
X205	Young	12	IBZ	0	1	0	0	0
X205	Young	12	IBZ	0	1	0	0	0
X205	Young	12	IBZ	0	1		0	0
X205	Young	12	IBZ	3	312	12	0	0.917431
X205	Young	12	IBZ	0	1		0	0
X205	Young	12	IBZ	0	1		0	0
X205	Young	12	IBZ	0	1		0	0
X205	Young	12	RZ	0	1	0	0	0
X205	Young	12	RZ	0	1	0	0	0
X205	Young	12	RZ	0	1	0	0	0
X205	Young	12	RZ	0	1	0	0	0
X205	Young	12	RZ	0	1	0	0	0
X205	Young	12	RZ	0	1		0	0
X205	Young	12	RZ	0	1		0	0
X205	Young	12	RZ	0	1		0	0
X205	Young	12	RZ	0	1		0	0
X205	Young	12	RZ	0	1		0	0
X205	Young	12	Scar	0	1	0	0	0
X205	Young	12	Scar	0	1	0	0	0
X205	Young	12	Scar	0	1	0	0	0
X205	Young	12	Scar	0	1	0	0	0
X205	Young	12	Scar	0	1	0	0	0
X205	Young	12	Scar	4	266		0	1.48148
X205	Young	12	Scar	3	333		0	0.892857
X205	Young	12	Scar	0	1		0	0
X205	Young	12	Scar	0	1		0	0
X205	Young	12	Scar	0	1		0	0
X209	Young	12	IBZ	1	62	5	0	1.47059
X209	Young	12	IBZ	0	1	0	0	0
X209	Young	12	IBZ	1	112	8	0	0.826446
X209	Young	12	IBZ	0	1	0	0	0
X209	Young	12	IBZ	2	61	10	0	2.73973
X209	Young	12	IBZ	0	1		0	0
X209	Young	12	IBZ	0	1		0	0
X209	Young	12	IBZ	4	263	20	0	1.39373
X209	Young	12	IBZ	9	230	18	0	3.50195
X209	Young	12	IBZ	0	1		0	0
X209	Young	12	RZ	0	1	0	0	0
X209	Young	12	RZ	0	1	0	0	0
X209	Young	12	RZ	0	1	0	0	0
X209	Young	12	RZ	0	1	0	0	0
X209	Young	12	RZ	0	1	0	0	0
X209	Young	12	RZ	0	1		0	0
X209	Young	12	RZ	0	1		0	0
X209	Young	12	RZ	0	1		0	0
X209	Young	12	RZ	0	1		0	0
X209	Young	12	RZ	0	1		0	0
X209	Young	12	Scar	0	1	0	0	0
X209	Young	12	Scar	10	50	0	0	16.6667
X209	Young	12	Scar	3	64	0	0	4.47761
X209	Young	12	Scar	2	38	0	0	5
X209	Young	12	Scar	1	81	0	0	1.21951
X209	Young	12	Scar	8	363	0	0	2.15633
X209	Young	12	Scar	0	1		0	0
X209	Young	12	Scar	5	507		0	0.976562
X209	Young	12	Scar	0	1		0	0
X209	Young	12	Scar	0	1		0	0
B1149	Aged	12	Scar	29	278	0	0	9.44625
B1149	Aged	12	Scar	14	283	0	0	4.7138
B1149	Aged	12	Scar	33	321	0	0	9.32203
B1149	Aged	12	Scar	5	402	0	0	1.2285
B1149	Aged	12	Scar	24	320	0	0	6.97674
CH233	Aged	1	IBZ Immediate	0	1		0	0
CH233	Aged	1	IBZ Immediate	2	68		0	2.85714
CH233	Aged	1	IBZ Immediate	0	1		0	0
CH233	Aged	1	IBZ Immediate	1	58		0	1.69492
CH233	Aged	1	IBZ Immediate	0	1		0	0
CH311	Aged	1	IBZ Immediate	0	1		0	0
CH311	Aged	1	IBZ Immediate	0	1		0	0
CH311	Aged	1	IBZ Immediate	0	1		0	0
CH311	Aged	1	IBZ Immediate	0	1		0	0
CH311	Aged	1	IBZ Immediate	3	35		0	7.89474
F981	Aged	1	IBZ Immediate	25	48		0	34.2466
F981	Aged	1	IBZ Immediate	9	38		0	19.1489
F981	Aged	1	IBZ Immediate	14	35		0	28.5714
F981	Aged	1	IBZ Immediate	3	53		0	5.35714
F981	Aged	1	IBZ Immediate	36	88		0	29.0323
X020	Aged	1	IBZ Immediate	2	56		0	3.44828
X020	Aged	1	IBZ Immediate	3	97		0	3
X020	Aged	1	IBZ Immediate	4	40		0	9.09091
X020	Aged	1	IBZ Immediate	0	1		0	0
X020	Aged	1	IBZ Immediate	4	33		0	10.8108
F184	Aged	2	IBZ Immediate	3	32		0	8.57143
F184	Aged	2	IBZ Immediate	0	1		0	0
F184	Aged	2	IBZ Immediate	0	1		0	0
F184	Aged	2	IBZ Immediate	4	56		0	6.66667
F184	Aged	2	IBZ Immediate	0	1		0	0
F322	Aged	2	IBZ Immediate	10	73		0	12.0482
F322	Aged	2	IBZ Immediate	0	1		0	0
F322	Aged	2	IBZ Immediate	13	56		0	18.8406
F322	Aged	2	IBZ Immediate	1	33		0	2.94118
F322	Aged	2	IBZ Immediate	0	1		0	0
F949	Aged	2	IBZ Immediate	3	50		0	5.66038
F949	Aged	2	IBZ Immediate	0	1		0	0
F949	Aged	2	IBZ Immediate	3	34		0	8.10811
F949	Aged	2	IBZ Immediate	2	57		0	3.38983
F949	Aged	2	IBZ Immediate	0	1		0	0
H962	Aged	2	IBZ Immediate	0	1		0	0
H962	Aged	2	IBZ Immediate	0	1		0	0
H962	Aged	2	IBZ Immediate	0	1		0	0
H962	Aged	2	IBZ Immediate	2	100		0	1.96078
H962	Aged	2	IBZ Immediate	11	77		0	12.5
F427	Aged	3	IBZ Immediate	8	27		0	22.8571
F427	Aged	3	IBZ Immediate	9	46		0	16.3636
F427	Aged	3	IBZ Immediate	0	1		0	0
F427	Aged	3	IBZ Immediate	0	1		0	0
F427	Aged	3	IBZ Immediate	0	1		0	0
R053	Aged	3	IBZ Immediate	10	13		0	43.4783
R053	Aged	3	IBZ Immediate	3	25		0	10.7143
R053	Aged	3	IBZ Immediate	0	1		0	0
R053	Aged	3	IBZ Immediate	6	22		0	21.4286
R053	Aged	3	IBZ Immediate	0	1		0	0
R126	Aged	3	IBZ Immediate	5	10		0	33.3333
R126	Aged	3	IBZ Immediate	6	24		0	20
R126	Aged	3	IBZ Immediate	6	31		0	16.2162
R126	Aged	3	IBZ Immediate	3	28		0	9.67742
R126	Aged	3	IBZ Immediate	0	1		0	0
R4304	Aged	3	IBZ Immediate	20	20		0	50
R4304	Aged	3	IBZ Immediate	13	19		0	40.625
R4304	Aged	3	IBZ Immediate	23	25		0	47.9167
R4304	Aged	3	IBZ Immediate	5	38		0	11.6279
R4304	Aged	3	IBZ Immediate	12	10		0	54.5455
X227	Aged	3	IBZ Immediate	4	40		0	9.09091
X227	Aged	3	IBZ Immediate	0	1		0	0
X227	Aged	3	IBZ Immediate	20	68		0	22.7273
X227	Aged	3	IBZ Immediate	10	41		0	19.6078
X227	Aged	3	IBZ Immediate	5	64		0	7.24638
B1149	Aged	12	IBZ Immediate	0	1		0	0
B1149	Aged	12	IBZ Immediate	1	11		0	8.33333
B1149	Aged	12	IBZ Immediate	0	1		0	0
B1149	Aged	12	IBZ Immediate	0	1		0	0
B1149	Aged	12	IBZ Immediate	1	10		0	9.09091
F894	Aged	12	IBZ Immediate	0	1		0	0
F894	Aged	12	IBZ Immediate	0	1		0	0
F894	Aged	12	IBZ Immediate	0	1		0	0
F894	Aged	12	IBZ Immediate	1	7		0	12.5
F894	Aged	12	IBZ Immediate	0	1		0	0
F985	Aged	12	IBZ Immediate	0	1		0	0
F985	Aged	12	IBZ Immediate	0	1		0	0
F985	Aged	12	IBZ Immediate	0	1		0	0
F985	Aged	12	IBZ Immediate	0	1		0	0
F985	Aged	12	IBZ Immediate	7	9		0	43.75
S1165	Aged	12	IBZ Immediate	1	28		0	3.44828
S1165	Aged	12	IBZ Immediate	3	6		0	33.3333
S1165	Aged	12	IBZ Immediate	0	1		0	0
S1165	Aged	12	IBZ Immediate	0	1		0	0
S1165	Aged	12	IBZ Immediate	0	1		0	0
5001	Young	1	IBZ Immediate	0	1		0	0
5001	Young	1	IBZ Immediate	0	1		0	0
5001	Young	1	IBZ Immediate	22	16		0	57.8947
5001	Young	1	IBZ Immediate	0	1		0	0
5001	Young	1	IBZ Immediate	0	1		0	0
D212	Young	1	IBZ Immediate	0	1		0	0
D212	Young	1	IBZ Immediate	2	60		0	3.22581
D212	Young	1	IBZ Immediate	0	1		0	0
D212	Young	1	IBZ Immediate	0	1		0	0
D212	Young	1	IBZ Immediate	0	1		0	0
D216	Young	1	IBZ Immediate	6	20		0	23.0769
D216	Young	1	IBZ Immediate	3	27		0	10
D216	Young	1	IBZ Immediate	12	45		0	21.0526
D216	Young	1	IBZ Immediate	9	31		0	22.5
D216	Young	1	IBZ Immediate	11	33		0	25
X103	Young	1	IBZ Immediate	0	1		0	0
X103	Young	1	IBZ Immediate	0	1		0	0
X103	Young	1	IBZ Immediate	1	79		0	1.25
X103	Young	1	IBZ Immediate	0	1		0	0
X103	Young	1	IBZ Immediate	0	1		0	0
5043	Young	2	IBZ Immediate	11	43		0	20.3704
5043	Young	2	IBZ Immediate	7	57		0	10.9375
5043	Young	2	IBZ Immediate	6	42		0	12.5
5043	Young	2	IBZ Immediate	0	1		0	0
5043	Young	2	IBZ Immediate	0	1		0	0
D218	Young	2	IBZ Immediate	0	1		0	0
D218	Young	2	IBZ Immediate	0	1		0	0
D218	Young	2	IBZ Immediate	0	1		0	0
D218	Young	2	IBZ Immediate	0	1		0	0
D218	Young	2	IBZ Immediate	0	1		0	0
X245	Young	2	IBZ Immediate	9	45		0	16.6667
X245	Young	2	IBZ Immediate	4	14		0	22.2222
X245	Young	2	IBZ Immediate	10	34		0	22.7273
X245	Young	2	IBZ Immediate	0	1		0	0
X245	Young	2	IBZ Immediate	5	46		0	9.80392
X247	Young	2	IBZ Immediate	0	1		0	0
X247	Young	2	IBZ Immediate	0	1		0	0
X247	Young	2	IBZ Immediate	1	44		0	2.22222
X247	Young	2	IBZ Immediate	1	51		0	1.92308
X247	Young	2	IBZ Immediate	0	1		0	0
X104	Young	3	IBZ Immediate	0	1		0	0
X104	Young	3	IBZ Immediate	0	1		0	0
X104	Young	3	IBZ Immediate	0	1		0	0
X104	Young	3	IBZ Immediate	0	1		0	0
X104	Young	3	IBZ Immediate	0	1		0	0
X106	Young	3	IBZ Immediate	0	1		0	0
X106	Young	3	IBZ Immediate	0	1		0	0
X106	Young	3	IBZ Immediate	0	1		0	0
X106	Young	3	IBZ Immediate	0	1		0	0
X106	Young	3	IBZ Immediate	0	1		0	0
X219	Young	3	IBZ Immediate	0	1		0	0
X219	Young	3	IBZ Immediate	5	78		0	6.0241
X219	Young	3	IBZ Immediate	1	48		0	2.04082
X219	Young	3	IBZ Immediate	1	52		0	1.88679
X219	Young	3	IBZ Immediate	0	1		0	0
X225	Young	3	IBZ Immediate	0	1		0	0
X225	Young	3	IBZ Immediate	0	1		0	0
X225	Young	3	IBZ Immediate	0	1		0	0
X225	Young	3	IBZ Immediate	0	1		0	0
X225	Young	3	IBZ Immediate	5	53		0	8.62069
X164	Young	12	IBZ Immediate	0	1		0	0
X164	Young	12	IBZ Immediate	0	1		0	0
X164	Young	12	IBZ Immediate	0	1		0	0
X164	Young	12	IBZ Immediate	0	1		0	0
X164	Young	12	IBZ Immediate	0	1		0	0
X203	Young	12	IBZ Immediate	0	1		0	0
X203	Young	12	IBZ Immediate	0	1		0	0
X203	Young	12	IBZ Immediate	0	1		0	0
X203	Young	12	IBZ Immediate	0	1		0	0
X203	Young	12	IBZ Immediate	0	1		0	0
X205	Young	12	IBZ Immediate	0	1		0	0
X205	Young	12	IBZ Immediate	0	1		0	0
X205	Young	12	IBZ Immediate	0	1		0	0
X205	Young	12	IBZ Immediate	0	1		0	0
X205	Young	12	IBZ Immediate	0	1		0	0
X209	Young	12	IBZ Immediate	1	15		0	6.25
X209	Young	12	IBZ Immediate	0	1		0	0
X209	Young	12	IBZ Immediate	4	26		0	13.3333
X209	Young	12	IBZ Immediate	0	1		0	0
X209	Young	12	IBZ Immediate	0	1		0	0

## Sheet: Panel E and F
								>2 foci	>2 foci	≤2 foci	≤2 foci
						Non-myocyte	Non-myocyte	Non-myocyte	Non-myocyte	Non-myocyte	Non-myocyte
Filename	Rabbit ID	Age Group	Weeks post-MI	Zone	Replicate	aSMA- gH2AX-	aSMA+ gH2AX-	aSMA- gH2AX+	aSMA+ gH2AX+	aSMA- gH2AX+	aSMA+ gH2AX+	# gH2AX+	# aSMA+	# gH2AX+ aSMA+	Total # Nuclei	% gH2AX+	% aSMA+	% of gH2AX+ that are aSMA+				Filename	Rabbit ID	# gH2AX foci aSMA- Non-myocyte	# gH2AX foci aSMA+ Non-myocyte
2021_04_22 SlideX Rabbit 554 aSMA_gH2AX 60x Scar 1 arrows	554	Aged	1	Scar	1	3	35	4	5	2	3	9	43	5	52	17.3077	82.6923	55.5556				2020_09_10 Slide173 X227 aSMA_gH2AX 60X Scar 1 arrows	X227	1	1
2021_04_22 SlideX Rabbit 554 aSMA_gH2AX 60x Scar 2 arrows	554	Aged	1	Scar	2	17	35	0	8	4	5	8	48	8	69	11.5942	69.5652	100				2020_09_10 Slide173 X227 aSMA_gH2AX 60X Scar 1 arrows	X227	1	1
2021_04_22 SlideX Rabbit 554 aSMA_gH2AX 60x Scar 3 arrows	554	Aged	1	Scar	3	9	34	2	13	0	10	15	57	13	68	22.0588	83.8235	86.6667				2020_09_10 Slide173 X227 aSMA_gH2AX 60X Scar 1 arrows	X227		3
2021_04_22 SlideX Rabbit 554 aSMA_gH2AX 60x Scar 4 arrows	554	Aged	1	Scar	4	7	33	2	10	2	6	12	49	10	60	20	81.6667	83.3333				2020_09_10 Slide173 X227 aSMA_gH2AX 60X Scar 1 arrows	X227	2	6
2021_04_22 SlideX Rabbit 554 aSMA_gH2AX 60x Scar 5 arrows	554	Aged	1	Scar	5	11	15	0	9	0	7	9	31	9	42	21.4286	73.8095	100				2020_09_10 Slide173 X227 aSMA_gH2AX 60X Scar 1 arrows	X227	1
2020_10_04 Slide187 F981 aSMA_gH2AX 60x Scar 1 arrows	F981	Aged	1	Scar	1	20	86	0	3	3	13	3	102	3	125	2.4	81.6	100				2020_09_10 Slide173 X227 aSMA_gH2AX 60X Scar 1 arrows	X227	2
2020_10_04 Slide187 F981 aSMA_gH2AX 60x Scar 2 arrows	F981	Aged	1	Scar	2	0	84	0	1	0	2	1	87	1	87	1.14943	100	100				2020_09_10 Slide173 X227 aSMA_gH2AX 60X Scar 1 arrows	X227	6	5
2020_10_04 Slide187 F981 aSMA_gH2AX 60x Scar 3 arrows	F981	Aged	1	Scar	3	16	96	0	3	6	10	3	109	3	131	2.29008	83.2061	100				2020_09_10 Slide173 X227 aSMA_gH2AX 60X Scar 1 arrows	X227	1
2020_10_04 Slide187 F981 aSMA_gH2AX 60x Scar 4 arrows	F981	Aged	1	Scar	4	32	49	0	1	4	1	1	51	1	87	1.14943	58.6207	100				2020_09_10 Slide173 X227 aSMA_gH2AX 60X Scar 1 arrows	X227	2
2020_10_04 Slide187 F981 aSMA_gH2AX 60x Scar 5 arrows	F981	Aged	1	Scar	5	35	107	1	6	3	14	7	127	6	166	4.21687	76.506	85.7143				2020_09_10 Slide173 X227 aSMA_gH2AX 60X Scar 1 arrows	X227	3
2020_09_29 Slide186 F184 aSMA_gH2AX 60X Scar 1 arrows	F184	Aged	2	Scar	1	52	12	0	1	4	0	1	13	1	69	1.44928	18.8406	100				2020_09_10 Slide173 X227 aSMA_gH2AX 60X Scar 1 arrows	X227	2
2020_09_29 Slide186 F184 aSMA_gH2AX 60X Scar 2 arrows	F184	Aged	2	Scar	2	3	25	0	8	3	6	8	39	8	45	17.7778	86.6667	100				2020_09_10 Slide173 X227 aSMA_gH2AX 60X Scar 1 arrows	X227	2
2020_09_29 Slide186 F184 aSMA_gH2AX 60X Scar 3 arrows	F184	Aged	2	Scar	3	14	27	1	5	0	7	6	39	5	54	11.1111	72.2222	83.3333				2020_09_10 Slide173 X227 aSMA_gH2AX 60X Scar 1 arrows	X227	3
2020_09_29 Slide186 F184 aSMA_gH2AX 60X Scar 4 arrows	F184	Aged	2	Scar	4	11	44	0	1	1	4	1	49	1	61	1.63934	80.3279	100				2020_09_10 Slide173 X227 aSMA_gH2AX 60X Scar 2 arrows	X227	5	1
2020_09_29 Slide186 F184 aSMA_gH2AX 60X Scar 5 arrows	F184	Aged	2	Scar	5	46	27	0	1	5	0	1	28	1	79	1.26582	35.443	100				2020_09_10 Slide173 X227 aSMA_gH2AX 60X Scar 2 arrows	X227	4
2021_02_06 Slide065 F322 aSMA_gH2AX 60x Scar 1 arrows	F322	Aged	2	Scar	1	83	7	4	0	14	0	4	7	0	108	3.7037	6.48148	0				2020_09_10 Slide173 X227 aSMA_gH2AX 60X Scar 2 arrows	X227	5	3
2021_02_06 Slide065 F322 aSMA_gH2AX 60x Scar 2 arrows	F322	Aged	2	Scar	2	64	12	2	0	3	2	2	14	0	83	2.40964	16.8675	0				2020_09_10 Slide173 X227 aSMA_gH2AX 60X Scar 2 arrows	X227	4	1
2021_02_06 Slide065 F322 aSMA_gH2AX 60x Scar 3 arrows	F322	Aged	2	Scar	3	73	14	2	1	8	0	3	15	1	98	3.06122	15.3061	33.3333				2020_09_10 Slide173 X227 aSMA_gH2AX 60X Scar 2 arrows	X227	1	3
2021_02_06 Slide065 F322 aSMA_gH2AX 60x Scar 4 arrows	F322	Aged	2	Scar	4	60	25	8	2	4	3	10	30	2	102	9.80392	29.4118	20				2020_09_10 Slide173 X227 aSMA_gH2AX 60X Scar 3 arrows	X227		3
2021_02_06 Slide065 F322 aSMA_gH2AX 60x Scar 5 arrows	F322	Aged	2	Scar	5	52	17	4	1	4	1	5	19	1	79	6.32911	24.0506	20				2020_09_10 Slide173 X227 aSMA_gH2AX 60X Scar 3 arrows	X227		3
2020_10_04 Slide184 F949 aSMA_gH2AX 60x Scar 1 arrows	F949	Aged	2	Scar	1	55	47	0	2	6	1	2	50	2	111	1.8018	45.045	100				2020_09_10 Slide173 X227 aSMA_gH2AX 60X Scar 3 arrows	X227		1
2020_10_04 Slide184 F949 aSMA_gH2AX 60x Scar 2 arrows	F949	Aged	2	Scar	2	51	22	2	3	9	1	5	26	3	88	5.68182	29.5455	60				2020_09_10 Slide173 X227 aSMA_gH2AX 60X Scar 3 arrows	X227		1
2020_10_04 Slide184 F949 aSMA_gH2AX 60x Scar 3 arrows	F949	Aged	2	Scar	3	27	41	0	3	1	1	3	45	3	73	4.10959	61.6438	100				2020_09_10 Slide173 X227 aSMA_gH2AX 60X Scar 3 arrows	X227		3
2020_10_04 Slide184 F949 aSMA_gH2AX 60x Scar 4 arrows	F949	Aged	2	Scar	4	63	14	1	1	4	0	2	15	1	83	2.40964	18.0723	50				2020_09_10 Slide173 X227 aSMA_gH2AX 60X Scar 3 arrows	X227	1	1
2020_10_04 Slide184 F949 aSMA_gH2AX 60x Scar 5 arrows	F949	Aged	2	Scar	5	80	12	0	0	10	0	0	12	0	102	0	11.7647	#DIV/0!				2020_09_10 Slide173 X227 aSMA_gH2AX 60X Scar 3 arrows	X227	1	4
2020_09_29 Slide180 H962 aSMA_gH2AX 60x Scar 1 arrows	H962	Aged	2	Scar	1	38	55	0	3	3	2	3	60	3	101	2.9703	59.4059	100				2020_09_10 Slide173 X227 aSMA_gH2AX 60X Scar 3 arrows	X227	2	1
2020_09_29 Slide180 H962 aSMA_gH2AX 60x Scar 2 arrows	H962	Aged	2	Scar	2	36	65	0	0	1	2	0	67	0	104	0	64.4231	#DIV/0!				2020_09_10 Slide173 X227 aSMA_gH2AX 60X Scar 3 arrows	X227	1	1
2020_09_29 Slide180 H962 aSMA_gH2AX 60x Scar 3 arrows	H962	Aged	2	Scar	3	27	39	0	1	0	1	1	41	1	68	1.47059	60.2941	100				2020_09_10 Slide173 X227 aSMA_gH2AX 60X Scar 3 arrows	X227	3	1
2020_09_29 Slide180 H962 aSMA_gH2AX 60x Scar 4 arrows	H962	Aged	2	Scar	4	22	23	1	2	5	2	3	27	2	55	5.45455	49.0909	66.6667				2020_09_10 Slide173 X227 aSMA_gH2AX 60X Scar 3 arrows	X227	1	5
2020_09_29 Slide180 H962 aSMA_gH2AX 60x Scar 5 arrows	H962	Aged	2	Scar	5	54	20	1	3	6	1	4	24	3	85	4.70588	28.2353	75				2020_09_10 Slide173 X227 aSMA_gH2AX 60X Scar 3 arrows	X227	5	1
2020_09_10 Slide176 F427 aSMA_gH2AX 60X Scar 1 arrows	F427	Aged	3	Scar	1	33	10	5	9	8	4	14	23	9	69	20.2899	33.3333	64.2857				2020_09_10 Slide173 X227 aSMA_gH2AX 60X Scar 3 arrows	X227	2	4
2020_09_10 Slide176 F427 aSMA_gH2AX 60X Scar 2 arrows	F427	Aged	3	Scar	2	47	27	8	4	14	2	12	33	4	102	11.7647	32.3529	33.3333				2020_09_10 Slide173 X227 aSMA_gH2AX 60X Scar 4 arrows	X227	2	4
2020_09_10 Slide176 F427 aSMA_gH2AX 60X Scar 3 arrows	F427	Aged	3	Scar	3	27	52	0	4	6	2	4	58	4	91	4.3956	63.7363	100				2020_09_10 Slide173 X227 aSMA_gH2AX 60X Scar 4 arrows	X227	3	1
2020_09_10 Slide176 F427 aSMA_gH2AX 60X Scar 4 arrows	F427	Aged	3	Scar	4	24	38	1	3	8	8	4	49	3	82	4.87805	59.7561	75				2020_09_10 Slide173 X227 aSMA_gH2AX 60X Scar 4 arrows	X227	2	6
2020_09_10 Slide176 F427 aSMA_gH2AX 60X Scar 5 arrows	F427	Aged	3	Scar	5	33	31	7	4	15	3	11	38	4	93	11.828	40.8602	36.3636				2020_09_10 Slide173 X227 aSMA_gH2AX 60X Scar 4 arrows	X227	7	1
2020_09_28 Slide177 R126 aSMA_gH2AX 60X Scar 1 arrows	R126	Aged	3	Scar	1	146	17	2	1	17	2	3	20	1	185	1.62162	10.8108	33.3333				2020_09_10 Slide173 X227 aSMA_gH2AX 60X Scar 4 arrows	X227		5
2020_09_28 Slide177 R126 aSMA_gH2AX 60X Scar 2 arrows	R126	Aged	3	Scar	2	104	22	0	3	5	2	3	27	3	136	2.20588	19.8529	100				2020_09_10 Slide173 X227 aSMA_gH2AX 60X Scar 4 arrows	X227	2	1
2020_09_28 Slide177 R126 aSMA_gH2AX 60X Scar 3 arrows	R126	Aged	3	Scar	3	78	9	10	10	9	3	20	22	10	119	16.8067	18.4874	50				2020_09_10 Slide173 X227 aSMA_gH2AX 60X Scar 4 arrows	X227	1
2020_09_28 Slide177 R126 aSMA_gH2AX 60X Scar 4 arrows	R126	Aged	3	Scar	4	81	22	2	0	3	5	2	27	0	113	1.76991	23.8938	0				2020_09_10 Slide173 X227 aSMA_gH2AX 60X Scar 4 arrows	X227	3
2020_09_28 Slide177 R126 aSMA_gH2AX 60X Scar 5 arrows	R126	Aged	3	Scar	5	46	30	10	14	6	0	24	44	14	106	22.6415	41.5094	58.3333				2020_09_10 Slide173 X227 aSMA_gH2AX 60X Scar 4 arrows	X227	5
2020_09_28 Slide178 R4304 aSMA_gH2AX 60X Scar 1 arrows	R4304	Aged	3	Scar	1	54	4	2	4	5	0	6	8	4	69	8.69565	11.5942	66.6667				2020_09_10 Slide173 X227 aSMA_gH2AX 60X Scar 4 arrows	X227	2
2020_09_28 Slide178 R4304 aSMA_gH2AX 60X Scar 2 arrows	R4304	Aged	3	Scar	2	41	10	2	2	9	1	4	13	2	65	6.15385	20	50				2020_09_10 Slide173 X227 aSMA_gH2AX 60X Scar 4 arrows	X227	1
2020_09_28 Slide178 R4304 aSMA_gH2AX 60X Scar 3 arrows	R4304	Aged	3	Scar	3	37	13	1	1	9	2	2	16	1	63	3.1746	25.3968	50				2020_09_10 Slide173 X227 aSMA_gH2AX 60X Scar 4 arrows	X227	1
2020_09_28 Slide178 R4304 aSMA_gH2AX 60X Scar 4 arrows	R4304	Aged	3	Scar	4	14	17	3	2	5	1	5	20	2	42	11.9048	47.619	40				2020_09_10 Slide173 X227 aSMA_gH2AX 60X Scar 4 arrows	X227	1
2020_09_28 Slide178 R4304 aSMA_gH2AX 60X Scar 5 arrows	R4304	Aged	3	Scar	5	70	33	5	2	10	0	7	35	2	120	5.83333	29.1667	28.5714				2020_09_10 Slide173 X227 aSMA_gH2AX 60X Scar 4 arrows	X227	3
2021_02_16 R498 aSMA_gH2AX 60x Scar 1 arrows	R498	Aged	3	Scar	1	43	5	3	0	6	0	3	5	0	57	5.26316	8.77193	0				2020_09_10 Slide173 X227 aSMA_gH2AX 60X Scar 5 arrows	X227		3
2021_02_16 R498 aSMA_gH2AX 60x Scar 2 arrows	R498	Aged	3	Scar	2	63	18	6	0	7	0	6	18	0	94	6.38298	19.1489	0				2020_09_10 Slide173 X227 aSMA_gH2AX 60X Scar 5 arrows	X227		1
2021_02_16 R498 aSMA_gH2AX 60x Scar 3 arrows	R498	Aged	3	Scar	3	87	4	3	0	7	0	3	4	0	101	2.9703	3.9604	0				2020_09_10 Slide173 X227 aSMA_gH2AX 60X Scar 5 arrows	X227		4
2021_02_16 R498 aSMA_gH2AX 60x Scar 4 arrows	R498	Aged	3	Scar	4	83	5	5	0	2	0	5	5	0	95	5.26316	5.26316	0				2020_09_10 Slide173 X227 aSMA_gH2AX 60X Scar 5 arrows	X227		4
2021_02_16 R498 aSMA_gH2AX 60x Scar 5 arrows	R498	Aged	3	Scar	5	58	5	3	0	9	2	3	7	0	77	3.8961	9.09091	0				2020_09_10 Slide173 X227 aSMA_gH2AX 60X Scar 5 arrows	X227		7
2020_09_10 Slide173 X227 aSMA_gH2AX 60X Scar 1 arrows	X227	Aged	3	Scar	1	41	35	3	3	9	2	6	40	3	93	6.45161	43.0108	50				2020_09_10 Slide173 X227 aSMA_gH2AX 60X Scar 5 arrows	X227	1
2020_09_10 Slide173 X227 aSMA_gH2AX 60X Scar 2 arrows	X227	Aged	3	Scar	2	24	15	4	2	1	2	6	19	2	48	12.5	39.5833	33.3333				2020_09_10 Slide173 X227 aSMA_gH2AX 60X Scar 5 arrows	X227	4
2020_09_10 Slide173 X227 aSMA_gH2AX 60X Scar 3 arrows	X227	Aged	3	Scar	3	50	32	2	6	6	7	8	45	6	103	7.76699	43.6893	75				2020_09_10 Slide173 X227 aSMA_gH2AX 60X Scar 5 arrows	X227	1	4
2020_09_10 Slide173 X227 aSMA_gH2AX 60X Scar 4 arrows	X227	Aged	3	Scar	4	57	23	5	3	8	3	8	29	3	99	8.08081	29.2929	37.5				2020_09_10 Slide173 X227 aSMA_gH2AX 60X Scar 5 arrows	X227	3	3
2020_09_10 Slide173 X227 aSMA_gH2AX 60X Scar 5 arrows	X227	Aged	3	Scar	5	59	50	2	6	2	1	8	57	6	120	6.66667	47.5	75				2020_09_10 Slide176 F427 aSMA_gH2AX 60X Scar 1 arrows	F427		3
2020_10_09 Slide198 B1149 aSMA_gH2AX 60x Scar 1 arros	B1149	Aged	12	Scar	1	20	7	12	1	12	1	13	9	1	53	24.5283	16.9811	7.69231				2020_09_10 Slide176 F427 aSMA_gH2AX 60X Scar 1 arrows	F427		2
2020_10_09 Slide198 B1149 aSMA_gH2AX 60x Scar 2 arrows	B1149	Aged	12	Scar	2	48	0	4	0	16	0	4	0	0	68	5.88235	0	0				2020_09_10 Slide176 F427 aSMA_gH2AX 60X Scar 1 arrows	F427		4
2020_10_09 Slide198 B1149 aSMA_gH2AX 60x Scar 3 arrows	B1149	Aged	12	Scar	3	42	10	12	0	4	0	12	10	0	68	17.6471	14.7059	0				2020_09_10 Slide176 F427 aSMA_gH2AX 60X Scar 1 arrows	F427		4
2020_10_09 Slide198 B1149 aSMA_gH2AX 60x Scar 4 arrows	B1149	Aged	12	Scar	4	40	6	8	1	14	1	9	8	1	70	12.8571	11.4286	11.1111				2020_09_10 Slide176 F427 aSMA_gH2AX 60X Scar 1 arrows	F427		3
2020_10_09 Slide198 B1149 aSMA_gH2AX 60x Scar 5 arrows	B1149	Aged	12	Scar	5	44	5	2	1	6	1	3	7	1	59	5.08475	11.8644	33.3333				2020_09_10 Slide176 F427 aSMA_gH2AX 60X Scar 1 arrows	F427	1	4
2020_10_13 Slide200 F894 aSMA_gH2AX 60x Scar 1 - Deconvolved 20 iterations, TypeBlind arrows	F894	Aged	12	Scar	1	1	38	11	2	15	1	13	41	2	68	19.1176	60.2941	15.3846				2020_09_10 Slide176 F427 aSMA_gH2AX 60X Scar 1 arrows	F427		4
2020_10_13 Slide200 F894 aSMA_gH2AX 60x Scar 2 - Deconvolved 20 iterations, TypeBlind arrows	F894	Aged	12	Scar	2	43	0	4	2	10	0	6	2	2	59	10.1695	3.38983	33.3333				2020_09_10 Slide176 F427 aSMA_gH2AX 60X Scar 1 arrows	F427	4	3
2020_10_13 Slide200 F894 aSMA_gH2AX 60x Scar 3 - Deconvolved 20 iterations, TypeBlind arrows	F894	Aged	12	Scar	3	27	8	1	1	6	0	2	9	1	43	4.65116	20.9302	50				2020_09_10 Slide176 F427 aSMA_gH2AX 60X Scar 1 arrows	F427		3
2020_10_13 Slide200 F894 aSMA_gH2AX 60x Scar 4 - Deconvolved 20 iterations, TypeBlind arrows	F894	Aged	12	Scar	4	41	1	7	0	5	0	7	1	0	54	12.963	1.85185	0				2020_09_10 Slide176 F427 aSMA_gH2AX 60X Scar 1 arrows	F427		1
2020_10_13 Slide200 F894 aSMA_gH2AX 60x Scar 5 - Deconvolved 20 iterations, TypeBlind arrows	F894	Aged	12	Scar	5	62	2	8	1	11	1	9	4	1	85	10.5882	4.70588	11.1111				2020_09_10 Slide176 F427 aSMA_gH2AX 60X Scar 1 arrows	F427	2	2
2012_06_06 Slide322 F985 aSMA_gH2AX 60x Scar 1 arrows	F985	Aged	12	Scar	1	45	46	3	7	5	2	10	55	7	108	9.25926	50.9259	70				2020_09_10 Slide176 F427 aSMA_gH2AX 60X Scar 1 arrows	F427	1	2
2012_06_06 Slide322 F985 aSMA_gH2AX 60x Scar 2 arrows	F985	Aged	12	Scar	2	34	33	1	3	6	12	4	48	3	89	4.49438	53.9326	75				2020_09_10 Slide176 F427 aSMA_gH2AX 60X Scar 1 arrows	F427	2	7
2012_06_06 Slide322 F985 aSMA_gH2AX 60x Scar 3 arrows	F985	Aged	12	Scar	3	40	14	3	6	3	1	9	21	6	67	13.4328	31.3433	66.6667				2020_09_10 Slide176 F427 aSMA_gH2AX 60X Scar 1 arrows	F427	2
2012_06_06 Slide322 F985 aSMA_gH2AX 60x Scar 4 arrows	F985	Aged	12	Scar	4	53	7	5	1	6	0	6	8	1	72	8.33333	11.1111	16.6667				2020_09_10 Slide176 F427 aSMA_gH2AX 60X Scar 1 arrows	F427	1
2012_06_06 Slide322 F985 aSMA_gH2AX 60x Scar 5 arrows	F985	Aged	12	Scar	5	42	57	5	6	2	6	11	69	6	118	9.32203	58.4746	54.5455				2020_09_10 Slide176 F427 aSMA_gH2AX 60X Scar 1 arrows	F427	1
2020_10_09 Slide199 S1165 aSMA_gH2AX 60x Scar 1 arrows	S1165	Aged	12	Scar	1	65	7	1	0	4	0	1	7	0	77	1.2987	9.09091	0				2020_09_10 Slide176 F427 aSMA_gH2AX 60X Scar 1 arrows	F427	3
2020_10_09 Slide199 S1165 aSMA_gH2AX 60x Scar 2 arrows	S1165	Aged	12	Scar	2	46	10	6	0	5	0	6	10	0	67	8.95522	14.9254	0				2020_09_10 Slide176 F427 aSMA_gH2AX 60X Scar 1 arrows	F427	1
2020_10_09 Slide199 S1165 aSMA_gH2AX 60x Scar 3 arrows	S1165	Aged	12	Scar	3	30	23	1	0	3	0	1	23	0	57	1.75439	40.3509	0				2020_09_10 Slide176 F427 aSMA_gH2AX 60X Scar 1 arrows	F427	5
2020_10_09 Slide199 S1165 aSMA_gH2AX 60x Scar 4 arrows	S1165	Aged	12	Scar	4	25	19	6	0	5	3	6	22	0	58	10.3448	37.931	0				2020_09_10 Slide176 F427 aSMA_gH2AX 60X Scar 1 arrows	F427	3
2020_10_09 Slide199 S1165 aSMA_gH2AX 60x Scar 5 arrow	S1165	Aged	12	Scar	5	58	8	1	1	8	1	2	10	1	77	2.5974	12.987	50				2020_09_10 Slide176 F427 aSMA_gH2AX 60X Scar 1 arrows	F427	4
2020_10_13 Slide190 C567 aSMA_gH2AX 60x Scar 1 - Deconvolved 20 iterations, TypeBlind arrows	C567	Young	1	Scar	1	3	85	0	1	0	2	1	88	1	91	1.0989	96.7033	100				2020_09_10 Slide176 F427 aSMA_gH2AX 60X Scar 2 arrows	F427	1	5
2020_10_13 Slide190 C567 aSMA_gH2AX 60x Scar 2 - Deconvolved 20 iterations, TypeBlind arrows	C567	Young	1	Scar	2	0	76	0	1	0	4	1	81	1	81	1.23457	100	100				2020_09_10 Slide176 F427 aSMA_gH2AX 60X Scar 2 arrows	F427	2	7
2020_10_13 Slide190 C567 aSMA_gH2AX 60x Scar 3 - Deconvolved 20 iterations, TypeBlind arrows	C567	Young	1	Scar	3	0	66	0	0	0	1	0	67	0	67	0	100	#DIV/0!				2020_09_10 Slide176 F427 aSMA_gH2AX 60X Scar 2 arrows	F427	1	1
2020_10_13 Slide190 C567 aSMA_gH2AX 60x Scar 4 - Deconvolved 20 iterations, TypeBlind arrows	C567	Young	1	Scar	4	4	63	0	1	0	7	1	71	1	75	1.33333	94.6667	100				2020_09_10 Slide176 F427 aSMA_gH2AX 60X Scar 2 arrows	F427	5	1
2020_10_13 Slide190 C567 aSMA_gH2AX 60x Scar 5 - Deconvolved 20 iterations, TypeBlind arrows	C567	Young	1	Scar	5	0	86	0	1	0	1	1	88	1	88	1.13636	100	100				2020_09_10 Slide176 F427 aSMA_gH2AX 60X Scar 2 arrows	F427	3	8
2020_10_13 Slide188 D212 aSMA_gH2AX 60x Scar 1 - Deconvolved 20 iterations, TypeBlind arrows	D212	Young	1	Scar	1	37	100	0	4	0	17	4	121	4	158	2.53165	76.5823	100				2020_09_10 Slide176 F427 aSMA_gH2AX 60X Scar 2 arrows	F427	8	4
2020_10_13 Slide188 D212 aSMA_gH2AX 60x Scar 2 - Deconvolved 20 iterations, TypeBlind arrows	D212	Young	1	Scar	2	48	57	0	8	8	17	8	82	8	138	5.7971	59.4203	100				2020_09_10 Slide176 F427 aSMA_gH2AX 60X Scar 2 arrows	F427	1
2020_10_13 Slide188 D212 aSMA_gH2AX 60x Scar 3 - Deconvolved 20 iterations, TypeBlind arrow	D212	Young	1	Scar	3	43	66	0	1	1	0	1	67	1	111	0.900901	60.3604	100				2020_09_10 Slide176 F427 aSMA_gH2AX 60X Scar 2 arrows	F427	2
2020_10_13 Slide188 D212 aSMA_gH2AX 60x Scar 4 - Deconvolved 20 iterations, TypeBlind arrows	D212	Young	1	Scar	4	0	95	0	4	1	17	4	116	4	117	3.4188	99.1453	100				2020_09_10 Slide176 F427 aSMA_gH2AX 60X Scar 2 arrows	F427	1
2020_10_13 Slide188 D212 aSMA_gH2AX 60x Scar 5 - Deconvolved 20 iterations, TypeBlind arrows	D212	Young	1	Scar	5	31	64	0	3	0	11	3	78	3	109	2.75229	71.5596	100				2020_09_10 Slide176 F427 aSMA_gH2AX 60X Scar 2 arrows	F427	1
2020_10_13 Slide189 D216 aSMA_gH2AX 60x Scar 1 - Deconvolved 20 iterations, TypeBlind arrow	D216	Young	1	Scar	1	43	38	0	0	3	0	0	38	0	84	0	45.2381	#DIV/0!				2020_09_10 Slide176 F427 aSMA_gH2AX 60X Scar 2 arrows	F427	2
2020_10_13 Slide189 D216 aSMA_gH2AX 60x Scar 3 - Deconvolved 20 iterations, TypeBlind arrows	D216	Young	1	Scar	2	59	36	1	0	2	0	1	36	0	98	1.02041	36.7347	0				2020_09_10 Slide176 F427 aSMA_gH2AX 60X Scar 2 arrows	F427	1
2020_10_13 Slide189 D216 aSMA_gH2AX 60x Scar 4 - Deconvolved 20 iterations, TypeBlind arrows	D216	Young	1	Scar	3	14	70	0	0	0	1	0	71	0	85	0	83.5294	#DIV/0!				2020_09_10 Slide176 F427 aSMA_gH2AX 60X Scar 2 arrows	F427	1
2020_10_13 Slide189 D216 aSMA_gH2AX 60x Scar 5 - Deconvolved 20 iterations, TypeBlind arrows	D216	Young	1	Scar	4	17	64	0	2	0	1	2	67	2	84	2.38095	79.7619	100				2020_09_10 Slide176 F427 aSMA_gH2AX 60X Scar 2 arrows	F427	2
2021_02_16 X103 aSMA_gH2AX 60x Scar 1 arrows	X103	Young	1	Scar	1	170	26	2	0	7	0	2	26	0	205	0.97561	12.6829	0				2020_09_10 Slide176 F427 aSMA_gH2AX 60X Scar 2 arrows	F427	3
2021_02_16 X103 aSMA_gH2AX 60x Scar 2 arrows	X103	Young	1	Scar	2	160	16	0	0	5	0	0	16	0	181	0	8.83978	#DIV/0!				2020_09_10 Slide176 F427 aSMA_gH2AX 60X Scar 2 arrows	F427	2
2021_02_16 X103 aSMA_gH2AX 60x Scar 3 arrows	X103	Young	1	Scar	3	144	27	0	0	0	0	0	27	0	171	0	15.7895	#DIV/0!				2020_09_10 Slide176 F427 aSMA_gH2AX 60X Scar 2 arrows	F427	4
2021_02_16 X103 aSMA_gH2AX 60x Scar 4 arrows	X103	Young	1	Scar	4	73	7	0	0	1	0	0	7	0	81	0	8.64198	#DIV/0!				2020_09_10 Slide176 F427 aSMA_gH2AX 60X Scar 2 arrows	F427	4
2021_02_16 X103 aSMA_gH2AX 60x Scar 5 arrows	X103	Young	1	Scar	5	113	4	0	0	1	0	0	4	0	118	0	3.38983	#DIV/0!				2020_09_10 Slide176 F427 aSMA_gH2AX 60X Scar 2 arrows	F427	3
2020_10_01 Slide185 5043 aSMA_gH2AX 60x Scar 2 arrows	5043	Young	2	Scar	1	42	30	0	1	11	0	1	31	1	84	1.19048	36.9048	100				2020_09_10 Slide176 F427 aSMA_gH2AX 60X Scar 2 arrows	F427	3
2020_10_01 Slide185 5043 aSMA_gH2AX 60x Scar 3 arrows	5043	Young	2	Scar	2	54	43	0	0	2	4	0	47	0	103	0	45.6311	#DIV/0!				2020_09_10 Slide176 F427 aSMA_gH2AX 60X Scar 2 arrows	F427	1
2020_10_01 Slide185 5043 aSMA_gH2AX 60x Scar 4 arrows	5043	Young	2	Scar	3	65	14	0	0	7	0	0	14	0	86	0	16.2791	#DIV/0!				2020_09_10 Slide176 F427 aSMA_gH2AX 60X Scar 2 arrows	F427	1
2020_10_01 Slide185 5043 aSMA_gH2AX 60x Scar 5 arrows	5043	Young	2	Scar	4	66	24	0	1	2	0	1	25	1	93	1.07527	26.8817	100				2020_09_10 Slide176 F427 aSMA_gH2AX 60X Scar 3 arrows	F427		1
2020_09_29 Slide179 D218 aSMA_gH2AX 60X Scar 1 arrows	D218	Young	2	Scar	1	32	41	3	3	5	5	6	49	3	89	6.74157	55.0562	50				2020_09_10 Slide176 F427 aSMA_gH2AX 60X Scar 3 arrows	F427		1
2020_09_29 Slide179 D218 aSMA_gH2AX 60X Scar 2 arrows	D218	Young	2	Scar	2	36	50	0	2	4	8	2	60	2	100	2	60	100				2020_09_10 Slide176 F427 aSMA_gH2AX 60X Scar 3 arrows	F427		3
2020_09_29 Slide179 D218 aSMA_gH2AX 60X Scar 3 arrows	D218	Young	2	Scar	3	18	35	1	5	10	5	6	45	5	74	8.10811	60.8108	83.3333				2020_09_10 Slide176 F427 aSMA_gH2AX 60X Scar 3 arrows	F427		3
2020_09_29 Slide179 D218 aSMA_gH2AX 60X Scar 4 arrows	D218	Young	2	Scar	4	72	36	0	2	11	7	2	45	2	128	1.5625	35.1562	100				2020_09_10 Slide176 F427 aSMA_gH2AX 60X Scar 3 arrows	F427	1	3
2020_09_29 Slide179 D218 aSMA_gH2AX 60X Scar 5 arrows	D218	Young	2	Scar	5	52	28	0	3	10	5	3	36	3	98	3.06122	36.7347	100				2020_09_10 Slide176 F427 aSMA_gH2AX 60X Scar 3 arrows	F427	1	4
2021_02_06 Slide069 X115 aSMA_gH2AX 60x Scar 1 arrows	X115	Young	2	Scar	1	91	28	0	0	0	0	0	28	0	119	0	23.5294	#DIV/0!				2020_09_10 Slide176 F427 aSMA_gH2AX 60X Scar 3 arrows	F427	1
2021_02_06 Slide069 X115 aSMA_gH2AX 60x Scar 2 arrows	X115	Young	2	Scar	2	53	45	0	0	1	1	0	46	0	100	0	46	#DIV/0!				2020_09_10 Slide176 F427 aSMA_gH2AX 60X Scar 3 arrows	F427	2
2021_02_06 Slide069 X115 aSMA_gH2AX 60x Scar 3 arrows	X115	Young	2	Scar	3	79	30	0	0	3	0	0	30	0	112	0	26.7857	#DIV/0!				2020_09_10 Slide176 F427 aSMA_gH2AX 60X Scar 3 arrows	F427	1
2021_02_06 Slide069 X115 aSMA_gH2AX 60x Scar 4 arrows	X115	Young	2	Scar	4	72	42	0	0	3	0	0	42	0	117	0	35.8974	#DIV/0!				2020_09_10 Slide176 F427 aSMA_gH2AX 60X Scar 3 arrows	F427	1
2021_02_06 Slide069 X115 aSMA_gH2AX 60x Scar 5 arrows	X115	Young	2	Scar	5	73	67	0	0	2	0	0	67	0	142	0	47.1831	#DIV/0!				2020_09_10 Slide176 F427 aSMA_gH2AX 60X Scar 4 arrows	F427	2
2020_10_01 Slide186 X245 aSMA_gH2AX 60x Scar 1 arrows	X245	Young	2	Scar	1	24	33	0	2	4	4	2	39	2	67	2.98507	58.209	100				2020_09_10 Slide176 F427 aSMA_gH2AX 60X Scar 4 arrows	F427	2	2
2020_10_01 Slide186 X245 aSMA_gH2AX 60x Scar 2 arrows	X245	Young	2	Scar	2	61	22	1	3	1	0	4	25	3	88	4.54545	28.4091	75				2020_09_10 Slide176 F427 aSMA_gH2AX 60X Scar 4 arrows	F427	1
2020_10_01 Slide186 X245 aSMA_gH2AX 60x Scar 3 arrows	X245	Young	2	Scar	3	55	28	0	3	5	2	3	33	3	93	3.22581	35.4839	100				2020_09_10 Slide176 F427 aSMA_gH2AX 60X Scar 4 arrows	F427	2
2020_10_01 Slide186 X245 aSMA_gH2AX 60x Scar 4 arrows	X245	Young	2	Scar	4	70	22	0	2	6	1	2	25	2	101	1.9802	24.7525	100				2020_09_10 Slide176 F427 aSMA_gH2AX 60X Scar 4 arrows	F427	2	6
2020_10_01 Slide186 X245 aSMA_gH2AX 60x Scar 5 arrows	X245	Young	2	Scar	5	93	16	1	2	11	2	3	20	2	125	2.4	16	66.6667				2020_09_10 Slide176 F427 aSMA_gH2AX 60X Scar 4 arrows	F427		2
2020_10_04 Slide193 3890 aSMA_gH2AX 60x Scar 1 arrows	3890	Young	3	Scar	1	65	23	1	0	7	3	1	26	0	99	1.0101	26.2626	0				2020_09_10 Slide176 F427 aSMA_gH2AX 60X Scar 4 arrows	F427		1
2020_10_04 Slide193 3890 aSMA_gH2AX 60x Scar 2 arrows	3890	Young	3	Scar	2	47	52	0	0	3	2	0	54	0	104	0	51.9231	#DIV/0!				2020_09_10 Slide176 F427 aSMA_gH2AX 60X Scar 4 arrows	F427		1
2020_10_04 Slide193 3890 aSMA_gH2AX 60x Scar 3 arrows	3890	Young	3	Scar	3	62	10	0	1	4	0	1	11	1	77	1.2987	14.2857	100				2020_09_10 Slide176 F427 aSMA_gH2AX 60X Scar 4 arrows	F427		4
2020_10_04 Slide193 3890 aSMA_gH2AX 60x Scar 4 arrows	3890	Young	3	Scar	4	58	10	0	1	6	1	1	12	1	76	1.31579	15.7895	100				2020_09_10 Slide176 F427 aSMA_gH2AX 60X Scar 4 arrows	F427		2
2020_10_04 Slide193 3890 aSMA_gH2AX 60x Scar 5 arrows	3890	Young	3	Scar	5	78	26	1	0	9	2	1	28	0	116	0.862069	24.1379	0				2020_09_10 Slide176 F427 aSMA_gH2AX 60X Scar 4 arrows	F427		2
2020_07_14	X220	Young	3	Scar	1								0	0								2020_09_10 Slide176 F427 aSMA_gH2AX 60X Scar 4 arrows	F427	2	2
2021_02_16 X221 aSMA_gH2AX 60x Scar 1 arrows	X221	Young	3	Scar	1	52	14	1	0	4	0	1	14	0	71	1.40845	19.7183	0				2020_09_10 Slide176 F427 aSMA_gH2AX 60X Scar 4 arrows	F427	3	4
2021_02_16 X221 aSMA_gH2AX 60x Scar 2 arrows	X221	Young	3	Scar	2	64	16	3	0	12	0	3	16	0	95	3.15789	16.8421	0				2020_09_10 Slide176 F427 aSMA_gH2AX 60X Scar 4 arrows	F427	1	1
2021_02_16 X221 aSMA_gH2AX 60x Scar 3 arrows	X221	Young	3	Scar	3	57	13	2	0	9	6	2	19	0	87	2.29885	21.8391	0				2020_09_10 Slide176 F427 aSMA_gH2AX 60X Scar 4 arrows	F427	1
2021_02_16 X221 aSMA_gH2AX 60x Scar 4 arrows	X221	Young	3	Scar	4	47	46	1	0	0	0	1	46	0	94	1.06383	48.9362	0				2020_09_10 Slide176 F427 aSMA_gH2AX 60X Scar 5 arrows	F427	7
2021_02_16 X221 aSMA_gH2AX 60x Scar 5 arrows	X221	Young	3	Scar	5	84	39	0	0	2	0	0	39	0	125	0	31.2	#DIV/0!				2020_09_10 Slide176 F427 aSMA_gH2AX 60X Scar 5 arrows	F427	2
2020_10_04 Slide191 X228 aSMA_gH2AX 60x Scar 1 arrows	X228	Young	3	Scar	1	62	0	1	0	8	0	1	0	0	71	1.40845	0	0				2020_09_10 Slide176 F427 aSMA_gH2AX 60X Scar 5 arrows	F427	1
2020_10_04 Slide191 X228 aSMA_gH2AX 60x Scar 2 arrows	X228	Young	3	Scar	2	53	7	1	0	4	0	1	7	0	65	1.53846	10.7692	0				2020_09_10 Slide176 F427 aSMA_gH2AX 60X Scar 5 arrows	F427	1
2020_10_04 Slide191 X228 aSMA_gH2AX 60x Scar 3 arrows	X228	Young	3	Scar	3	72	10	1	2	7	1	3	13	2	93	3.22581	13.9785	66.6667				2020_09_10 Slide176 F427 aSMA_gH2AX 60X Scar 5 arrows	F427	3
2020_10_04 Slide191 X228 aSMA_gH2AX 60x Scar 4 arrows	X228	Young	3	Scar	4	72	5	1	0	10	0	1	5	0	88	1.13636	5.68182	0				2020_09_10 Slide176 F427 aSMA_gH2AX 60X Scar 5 arrows	F427	2	4
2020_10_04 Slide191 X228 aSMA_gH2AX 60x Scar 5 arrows	X228	Young	3	Scar	5	73	0	2	0	14	0	2	0	0	89	2.24719	0	0				2020_09_10 Slide176 F427 aSMA_gH2AX 60X Scar 5 arrows	F427		5
2020_10_04 Slide192 X230 aSMA_gH2AX 60x Scar 1 arrows	X230	Young	3	Scar	1	112	0	0	0	3	0	0	0	0	115	0	0	#DIV/0!				2020_09_10 Slide176 F427 aSMA_gH2AX 60X Scar 5 arrows	F427	4	2
2020_10_04 Slide192 X230 aSMA_gH2AX 60x Scar 2 arrows	X230	Young	3	Scar	2	76	0	1	0	10	0	1	0	0	87	1.14943	0	0				2020_09_10 Slide176 F427 aSMA_gH2AX 60X Scar 5 arrows	F427	2
2020_10_04 Slide192 X230 aSMA_gH2AX 60x Scar 3 arrows	X230	Young	3	Scar	3	158	3	0	0	9	0	0	3	0	170	0	1.76471	#DIV/0!				2020_09_10 Slide176 F427 aSMA_gH2AX 60X Scar 5 arrows	F427	2
2020_10_04 Slide192 X230 aSMA_gH2AX 60x Scar 4 arrows	X230	Young	3	Scar	4	43	10	0	0	1	1	0	11	0	55	0	20	#DIV/0!				2020_09_10 Slide176 F427 aSMA_gH2AX 60X Scar 5 arrows	F427	1
2020_10_04 Slide192 X230 aSMA_gH2AX 60x Scar 5 arrows	X230	Young	3	Scar	5	39	7	1	0	4	1	1	8	0	52	1.92308	15.3846	0				2020_09_10 Slide176 F427 aSMA_gH2AX 60X Scar 5 arrows	F427	1
2020_10_09 Slide201 91442 aSMA_gH2AX 60x Scar 1 arrows	91442	Young	12	Scar	1	58	15	0	0	6	4	0	19	0	83	0	22.8916	#DIV/0!				2020_09_10 Slide176 F427 aSMA_gH2AX 60X Scar 5 arrows	F427	2	3
2020_10_09 Slide201 91442 aSMA_gH2AX 60x Scar 2 arrows	91442	Young	12	Scar	2	55	0	1	0	1	0	1	0	0	57	1.75439	0	0				2020_09_10 Slide176 F427 aSMA_gH2AX 60X Scar 5 arrows	F427	1
2020_10_09 Slide201 91442 aSMA_gH2AX 60x Scar 3 arrows	91442	Young	12	Scar	3	65	0	1	0	6	0	1	0	0	72	1.38889	0	0				2020_09_10 Slide176 F427 aSMA_gH2AX 60X Scar 5 arrows	F427	2	1
2020_10_09 Slide201 91442 aSMA_gH2AX 60x Scar 4 arrows	91442	Young	12	Scar	4	40	0	1	0	4	0	1	0	0	45	2.22222	0	0				2020_09_10 Slide176 F427 aSMA_gH2AX 60X Scar 5 arrows	F427	4	4
2020_10_09 Slide201 91442 aSMA_gH2AX 60x Scar 5 arrows	91442	Young	12	Scar	5	40	7	0	0	3	0	0	7	0	50	0	14	#DIV/0!				2020_09_10 Slide176 F427 aSMA_gH2AX 60X Scar 5 arrows	F427	2	2
2020_10_09 Slide202 X203 aSMA_gH2AX 60x Scar 1 arrows	X203	Young	12	Scar	1	115	1	0	0	7	0	0	1	0	123	0	0.813008	#DIV/0!				2020_09_10 Slide176 F427 aSMA_gH2AX 60X Scar 5 arrows	F427	4
2020_10_09 Slide202 X203 aSMA_gH2AX 60x Scar 2 arrows	X203	Young	12	Scar	2	44	27	1	0	5	3	1	30	0	80	1.25	37.5	0				2020_09_10 Slide176 F427 aSMA_gH2AX 60X Scar 5 arrows	F427	3
2020_10_09 Slide202 X203 aSMA_gH2AX 60x Scar 3 arrows	X203	Young	12	Scar	3	132	77	0	0	4	1	0	78	0	214	0	36.4486	#DIV/0!				2020_09_10 Slide176 F427 aSMA_gH2AX 60X Scar 5 arrows	F427	1
2020_10_09 Slide202 X203 aSMA_gH2AX 60x Scar 4 arrows	X203	Young	12	Scar	4	109	0	1	0	0	0	1	0	0	110	0.909091	0	0				2020_09_10 Slide176 F427 aSMA_gH2AX 60X Scar 5 arrows	F427	2
2020_10_09 Slide202 X203 aSMA_gH2AX 60x Scar 5 arrows	X203	Young	12	Scar	5	63	7	0	0	2	0	0	7	0	72	0	9.72222	#DIV/0!				2020_09_10 Slide176 F427 aSMA_gH2AX 60X Scar 5 arrows	F427	2
2021_02_16 X205 aSMA_gH2AX 60x Scar 1 arrows	X205	Young	12	Scar	1	72	8	0	0	3	0	0	8	0	83	0	9.63855	#DIV/0!				2020_09_10 Slide176 F427 aSMA_gH2AX 60X Scar 5 arrows	F427	7
2021_02_16 X205 aSMA_gH2AX 60x Scar 2 arrows	X205	Young	12	Scar	2	110	7	1	0	2	0	1	7	0	120	0.833333	5.83333	0				2020_09_28 Slide177 R126 aSMA_gH2AX 60X Scar 1 arrows	R126	6	2
2021_02_16 X205 aSMA_gH2AX 60x Scar 3 arrows	X205	Young	12	Scar	3	79	22	1	0	1	0	1	22	0	103	0.970874	21.3592	0				2020_09_28 Slide177 R126 aSMA_gH2AX 60X Scar 1 arrows	R126	1
2021_02_16 X205 aSMA_gH2AX 60x Scar 4 arrows	X205	Young	12	Scar	4	84	11	0	0	0	0	0	11	0	95	0	11.5789	#DIV/0!				2020_09_28 Slide177 R126 aSMA_gH2AX 60X Scar 1 arrows	R126	1
2021_02_16 X205 aSMA_gH2AX 60x Scar 5 arrows	X205	Young	12	Scar	5	93	22	0	1	2	0	1	23	1	118	0.847458	19.4915	100				2020_09_28 Slide177 R126 aSMA_gH2AX 60X Scar 1 arrows	R126	2
2020_11_09 Slide203 X209 aSMA_gH2AX 60x Scar 1 arrows	X209	Young	12	Scar	1	103	3	0	0	6	0	0	3	0	112	0	2.67857	#DIV/0!				2020_09_28 Slide177 R126 aSMA_gH2AX 60X Scar 1 arrows	R126	2
2020_11_09 Slide203 X209 aSMA_gH2AX 60x Scar 2 arrows	X209	Young	12	Scar	2	67	5	1	0	11	0	1	5	0	84	1.19048	5.95238	0				2020_09_28 Slide177 R126 aSMA_gH2AX 60X Scar 1 arrows	R126	2
2020_11_09 Slide203 X209 aSMA_gH2AX 60x Scar 3 arrows	X209	Young	12	Scar	3	79	5	1	0	7	0	1	5	0	92	1.08696	5.43478	0				2020_09_28 Slide177 R126 aSMA_gH2AX 60X Scar 1 arrows	R126	2
2020_11_09 Slide203 X209 aSMA_gH2AX 60x Scar 4 arrows	X209	Young	12	Scar	4	2	90	0	0	7	0	0	90	0	99	0	90.9091	#DIV/0!				2020_09_28 Slide177 R126 aSMA_gH2AX 60X Scar 1 arrows	R126	2
2020_11_09 Slide203 X209 aSMA_gH2AX 60x Scar 5 arrows	X209	Young	12	Scar	5	48	0	2	0	10	0	2	0	0	60	3.33333	0	0				2020_09_28 Slide177 R126 aSMA_gH2AX 60X Scar 1 arrows	R126	2
2021_05_27 Slide391 552 aSMA_gH2AX 60x Scar 5 - Deconvolved, Type Automatic	552	Aged	1	Scar	5	1	37	0	2	0	6	2	45	2	46	4.34783	97.8261	100				2020_09_28 Slide177 R126 aSMA_gH2AX 60X Scar 1 arrows	R126	2
2021_05_27 Slide391 552 aSMA_gH2AX 60x Scar 4 - Deconvolved, Type Automatic	552	Aged	1	Scar	4	4	29	0	3	0	5	3	37	3	41	7.31707	90.2439	100				2020_09_28 Slide177 R126 aSMA_gH2AX 60X Scar 1 arrows	R126	1
2021_05_27 Slide391 552 aSMA_gH2AX 60x Scar 3 - Deconvolved, Type Automatic	552	Aged	1	Scar	3	2	59	0	6	0	8	6	73	6	75	8	97.3333	100				2020_09_28 Slide177 R126 aSMA_gH2AX 60X Scar 1 arrows	R126	1
2021_05_27 Slide391 552 aSMA_gH2AX 60x Scar 2 - Deconvolved, Type Automatic	552	Aged	1	Scar	2	4	44	0	4	0	4	4	52	4	56	7.14286	92.8571	100				2020_09_28 Slide177 R126 aSMA_gH2AX 60X Scar 1 arrows	R126		5
2021_05_27 Slide391 552 aSMA_gH2AX 60x Scar 1 - Deconvolved, Type Automatic	552	Aged	1	Scar	1	5	22	1	8	2	8	9	38	8	46	19.5652	82.6087	88.8889				2020_09_28 Slide177 R126 aSMA_gH2AX 60X Scar 1 arrows	R126	1	2
																						2020_09_28 Slide177 R126 aSMA_gH2AX 60X Scar 1 arrows	R126	1
																						2020_09_28 Slide177 R126 aSMA_gH2AX 60X Scar 1 arrows	R126	1
																						2020_09_28 Slide177 R126 aSMA_gH2AX 60X Scar 1 arrows	R126	2
																						2020_09_28 Slide177 R126 aSMA_gH2AX 60X Scar 1 arrows	R126	2
																						2020_09_28 Slide177 R126 aSMA_gH2AX 60X Scar 1 arrows	R126	3
																						2020_09_28 Slide177 R126 aSMA_gH2AX 60X Scar 1 arrows	R126	2
																						2020_09_28 Slide177 R126 aSMA_gH2AX 60X Scar 2 arrows	R126	1	1
																						2020_09_28 Slide177 R126 aSMA_gH2AX 60X Scar 2 arrows	R126	1	1
																						2020_09_28 Slide177 R126 aSMA_gH2AX 60X Scar 2 arrows	R126	1	4
																						2020_09_28 Slide177 R126 aSMA_gH2AX 60X Scar 2 arrows	R126	2	4
																						2020_09_28 Slide177 R126 aSMA_gH2AX 60X Scar 2 arrows	R126	1	3
																						2020_09_28 Slide177 R126 aSMA_gH2AX 60X Scar 3 arrows	R126		10
																						2020_09_28 Slide177 R126 aSMA_gH2AX 60X Scar 3 arrows	R126	7	7
																						2020_09_28 Slide177 R126 aSMA_gH2AX 60X Scar 3 arrows	R126	3	3
																						2020_09_28 Slide177 R126 aSMA_gH2AX 60X Scar 3 arrows	R126	6	2
																						2020_09_28 Slide177 R126 aSMA_gH2AX 60X Scar 3 arrows	R126		4
																						2020_09_28 Slide177 R126 aSMA_gH2AX 60X Scar 3 arrows	R126	8	2
																						2020_09_28 Slide177 R126 aSMA_gH2AX 60X Scar 3 arrows	R126	2
																						2020_09_28 Slide177 R126 aSMA_gH2AX 60X Scar 3 arrows	R126	1
																						2020_09_28 Slide177 R126 aSMA_gH2AX 60X Scar 3 arrows	R126	1
																						2020_09_28 Slide177 R126 aSMA_gH2AX 60X Scar 3 arrows	R126	1
																						2020_09_28 Slide177 R126 aSMA_gH2AX 60X Scar 3 arrows	R126	1
																						2020_09_28 Slide177 R126 aSMA_gH2AX 60X Scar 3 arrows	R126	2	2
																						2020_09_28 Slide177 R126 aSMA_gH2AX 60X Scar 3 arrows	R126	11	6
																						2020_09_28 Slide177 R126 aSMA_gH2AX 60X Scar 3 arrows	R126	7	6
																						2020_09_28 Slide177 R126 aSMA_gH2AX 60X Scar 3 arrows	R126	6	5
																						2020_09_28 Slide177 R126 aSMA_gH2AX 60X Scar 3 arrows	R126	4	3
																						2020_09_28 Slide177 R126 aSMA_gH2AX 60X Scar 3 arrows	R126	1	3
																						2020_09_28 Slide177 R126 aSMA_gH2AX 60X Scar 3 arrows	R126	5	4
																						2020_09_28 Slide177 R126 aSMA_gH2AX 60X Scar 3 arrows	R126	2
																						2020_09_28 Slide177 R126 aSMA_gH2AX 60X Scar 3 arrows	R126	2
																						2020_09_28 Slide177 R126 aSMA_gH2AX 60X Scar 3 arrows	R126	4
																						2020_09_28 Slide177 R126 aSMA_gH2AX 60X Scar 4 arrows	R126		1
																						2020_09_28 Slide177 R126 aSMA_gH2AX 60X Scar 4 arrows	R126	1	1
																						2020_09_28 Slide177 R126 aSMA_gH2AX 60X Scar 4 arrows	R126	3	1
																						2020_09_28 Slide177 R126 aSMA_gH2AX 60X Scar 4 arrows	R126	1	2
																						2020_09_28 Slide177 R126 aSMA_gH2AX 60X Scar 4 arrows	R126	5	1
																						2020_09_28 Slide177 R126 aSMA_gH2AX 60X Scar 4 arrows	R126	2
																						2020_09_28 Slide177 R126 aSMA_gH2AX 60X Scar 5 arrows	R126		5
																						2020_09_28 Slide177 R126 aSMA_gH2AX 60X Scar 5 arrows	R126	4	3
																						2020_09_28 Slide177 R126 aSMA_gH2AX 60X Scar 5 arrows	R126		3
																						2020_09_28 Slide177 R126 aSMA_gH2AX 60X Scar 5 arrows	R126	4	3
																						2020_09_28 Slide177 R126 aSMA_gH2AX 60X Scar 5 arrows	R126		4
																						2020_09_28 Slide177 R126 aSMA_gH2AX 60X Scar 5 arrows	R126		4
																						2020_09_28 Slide177 R126 aSMA_gH2AX 60X Scar 5 arrows	R126	3	5
																						2020_09_28 Slide177 R126 aSMA_gH2AX 60X Scar 5 arrows	R126	6
																						2020_09_28 Slide177 R126 aSMA_gH2AX 60X Scar 5 arrows	R126	3
																						2020_09_28 Slide177 R126 aSMA_gH2AX 60X Scar 5 arrows	R126	1	5
																						2020_09_28 Slide177 R126 aSMA_gH2AX 60X Scar 5 arrows	R126	5	4
																						2020_09_28 Slide177 R126 aSMA_gH2AX 60X Scar 5 arrows	R126	1
																						2020_09_28 Slide177 R126 aSMA_gH2AX 60X Scar 5 arrows	R126	2	6
																						2020_09_28 Slide177 R126 aSMA_gH2AX 60X Scar 5 arrows	R126	4	5
																						2020_09_28 Slide177 R126 aSMA_gH2AX 60X Scar 5 arrows	R126	1
																						2020_09_28 Slide177 R126 aSMA_gH2AX 60X Scar 5 arrows	R126	3
																						2020_09_28 Slide177 R126 aSMA_gH2AX 60X Scar 5 arrows	R126	8
																						2020_09_28 Slide177 R126 aSMA_gH2AX 60X Scar 5 arrows	R126	2
																						2020_09_28 Slide177 R126 aSMA_gH2AX 60X Scar 5 arrows	R126	3
																						2020_09_28 Slide177 R126 aSMA_gH2AX 60X Scar 5 arrows	R126		3
																						2020_09_28 Slide177 R126 aSMA_gH2AX 60X Scar 5 arrows	R126		7
																						2020_09_28 Slide177 R126 aSMA_gH2AX 60X Scar 5 arrows	R126	2	4
																						2020_09_28 Slide178 R4304 aSMA_gH2AX 60X Scar 1 arrows	R4304	2	3
																						2020_09_28 Slide178 R4304 aSMA_gH2AX 60X Scar 1 arrows	R4304	2	3
																						2020_09_28 Slide178 R4304 aSMA_gH2AX 60X Scar 1 arrows	R4304	1	4
																						2020_09_28 Slide178 R4304 aSMA_gH2AX 60X Scar 1 arrows	R4304	4	3
																						2020_09_28 Slide178 R4304 aSMA_gH2AX 60X Scar 1 arrows	R4304	1
																						2020_09_28 Slide178 R4304 aSMA_gH2AX 60X Scar 1 arrows	R4304	1
																						2020_09_28 Slide178 R4304 aSMA_gH2AX 60X Scar 1 arrows	R4304	4
																						2020_09_28 Slide178 R4304 aSMA_gH2AX 60X Scar 2 arrows	R4304	1
																						2020_09_28 Slide178 R4304 aSMA_gH2AX 60X Scar 2 arrows	R4304	2
																						2020_09_28 Slide178 R4304 aSMA_gH2AX 60X Scar 2 arrows	R4304	5
																						2020_09_28 Slide178 R4304 aSMA_gH2AX 60X Scar 2 arrows	R4304	1	4
																						2020_09_28 Slide178 R4304 aSMA_gH2AX 60X Scar 2 arrows	R4304	1
																						2020_09_28 Slide178 R4304 aSMA_gH2AX 60X Scar 2 arrows	R4304	1
																						2020_09_28 Slide178 R4304 aSMA_gH2AX 60X Scar 2 arrows	R4304	4
																						2020_09_28 Slide178 R4304 aSMA_gH2AX 60X Scar 2 arrows	R4304	1	1
																						2020_09_28 Slide178 R4304 aSMA_gH2AX 60X Scar 2 arrows	R4304	1
																						2020_09_28 Slide178 R4304 aSMA_gH2AX 60X Scar 2 arrows	R4304	2
																						2020_09_28 Slide178 R4304 aSMA_gH2AX 60X Scar 2 arrows	R4304	2	3
																						2020_09_28 Slide178 R4304 aSMA_gH2AX 60X Scar 3 arrows	R4304	1	1
																						2020_09_28 Slide178 R4304 aSMA_gH2AX 60X Scar 3 arrows	R4304	1	1
																						2020_09_28 Slide178 R4304 aSMA_gH2AX 60X Scar 3 arrows	R4304	5
																						2020_09_28 Slide178 R4304 aSMA_gH2AX 60X Scar 3 arrows	R4304	1
																						2020_09_28 Slide178 R4304 aSMA_gH2AX 60X Scar 3 arrows	R4304	1	5
																						2020_09_28 Slide178 R4304 aSMA_gH2AX 60X Scar 3 arrows	R4304	1
																						2020_09_28 Slide178 R4304 aSMA_gH2AX 60X Scar 3 arrows	R4304	1
																						2020_09_28 Slide178 R4304 aSMA_gH2AX 60X Scar 3 arrows	R4304	2
																						2020_09_28 Slide178 R4304 aSMA_gH2AX 60X Scar 3 arrows	R4304	1
																						2020_09_28 Slide178 R4304 aSMA_gH2AX 60X Scar 3 arrows	R4304	2
																						2020_09_28 Slide178 R4304 aSMA_gH2AX 60X Scar 4 arrows	R4304	1	2
																						2020_09_28 Slide178 R4304 aSMA_gH2AX 60X Scar 4 arrows	R4304	3	3
																						2020_09_28 Slide178 R4304 aSMA_gH2AX 60X Scar 4 arrows	R4304	2
																						2020_09_28 Slide178 R4304 aSMA_gH2AX 60X Scar 4 arrows	R4304	3	3
																						2020_09_28 Slide178 R4304 aSMA_gH2AX 60X Scar 4 arrows	R4304	4
																						2020_09_28 Slide178 R4304 aSMA_gH2AX 60X Scar 4 arrows	R4304	1
																						2020_09_28 Slide178 R4304 aSMA_gH2AX 60X Scar 4 arrows	R4304	1
																						2020_09_28 Slide178 R4304 aSMA_gH2AX 60X Scar 4 arrows	R4304	1
																						2020_09_28 Slide178 R4304 aSMA_gH2AX 60X Scar 5 arrows	R4304	3
																						2020_09_28 Slide178 R4304 aSMA_gH2AX 60X Scar 5 arrows	R4304	2
																						2020_09_28 Slide178 R4304 aSMA_gH2AX 60X Scar 5 arrows	R4304	1
																						2020_09_28 Slide178 R4304 aSMA_gH2AX 60X Scar 5 arrows	R4304	1
																						2020_09_28 Slide178 R4304 aSMA_gH2AX 60X Scar 5 arrows	R4304	3	3
																						2020_09_28 Slide178 R4304 aSMA_gH2AX 60X Scar 5 arrows	R4304	2
																						2020_09_28 Slide178 R4304 aSMA_gH2AX 60X Scar 5 arrows	R4304	1
																						2020_09_28 Slide178 R4304 aSMA_gH2AX 60X Scar 5 arrows	R4304	3	3
																						2020_09_28 Slide178 R4304 aSMA_gH2AX 60X Scar 5 arrows	R4304	3
																						2020_09_28 Slide178 R4304 aSMA_gH2AX 60X Scar 5 arrows	R4304	2
																						2020_09_28 Slide178 R4304 aSMA_gH2AX 60X Scar 5 arrows	R4304	2
																						2020_09_28 Slide178 R4304 aSMA_gH2AX 60X Scar 5 arrows	R4304	1
																						2020_09_28 Slide178 R4304 aSMA_gH2AX 60X Scar 5 arrows	R4304	3
																						2020_09_28 Slide178 R4304 aSMA_gH2AX 60X Scar 5 arrows	R4304	1
																						2020_09_28 Slide178 R4304 aSMA_gH2AX 60X Scar 5 arrows	R4304	1
																						2020_09_29 Slide179 D218 aSMA_gH2AX 60X Scar 1 arrows	D218	2
																						2020_09_29 Slide179 D218 aSMA_gH2AX 60X Scar 1 arrows	D218	4	1
																						2020_09_29 Slide179 D218 aSMA_gH2AX 60X Scar 1 arrows	D218	6	2
																						2020_09_29 Slide179 D218 aSMA_gH2AX 60X Scar 1 arrows	D218	1
																						2020_09_29 Slide179 D218 aSMA_gH2AX 60X Scar 1 arrows	D218	4
																						2020_09_29 Slide179 D218 aSMA_gH2AX 60X Scar 1 arrows	D218	1	6
																						2020_09_29 Slide179 D218 aSMA_gH2AX 60X Scar 1 arrows	D218	1	2
																						2020_09_29 Slide179 D218 aSMA_gH2AX 60X Scar 1 arrows	D218		3
																						2020_09_29 Slide179 D218 aSMA_gH2AX 60X Scar 1 arrows	D218	1	7
																						2020_09_29 Slide179 D218 aSMA_gH2AX 60X Scar 1 arrows	D218		1
																						2020_09_29 Slide179 D218 aSMA_gH2AX 60X Scar 1 arrows	D218		1
																						2020_09_29 Slide179 D218 aSMA_gH2AX 60X Scar 2 arrows	D218	1
																						2020_09_29 Slide179 D218 aSMA_gH2AX 60X Scar 2 arrows	D218	1
																						2020_09_29 Slide179 D218 aSMA_gH2AX 60X Scar 2 arrows	D218	1	3
																						2020_09_29 Slide179 D218 aSMA_gH2AX 60X Scar 2 arrows	D218	1	1
																						2020_09_29 Slide179 D218 aSMA_gH2AX 60X Scar 2 arrows	D218		2
																						2020_09_29 Slide179 D218 aSMA_gH2AX 60X Scar 2 arrows	D218		1
																						2020_09_29 Slide179 D218 aSMA_gH2AX 60X Scar 2 arrows	D218		1
																						2020_09_29 Slide179 D218 aSMA_gH2AX 60X Scar 2 arrows	D218		2
																						2020_09_29 Slide179 D218 aSMA_gH2AX 60X Scar 2 arrows	D218		1
																						2020_09_29 Slide179 D218 aSMA_gH2AX 60X Scar 2 arrows	D218		2
																						2020_09_29 Slide179 D218 aSMA_gH2AX 60X Scar 2 arrows	D218		1
																						2020_09_29 Slide179 D218 aSMA_gH2AX 60X Scar 2 arrows	D218		5
																						2020_09_29 Slide179 D218 aSMA_gH2AX 60X Scar 3 arrows	D218	1	2
																						2020_09_29 Slide179 D218 aSMA_gH2AX 60X Scar 3 arrows	D218	1	2
																						2020_09_29 Slide179 D218 aSMA_gH2AX 60X Scar 3 arrows	D218	1	3
																						2020_09_29 Slide179 D218 aSMA_gH2AX 60X Scar 3 arrows	D218	6
																						2020_09_29 Slide179 D218 aSMA_gH2AX 60X Scar 3 arrows	D218	2
																						2020_09_29 Slide179 D218 aSMA_gH2AX 60X Scar 3 arrows	D218	2	2
																						2020_09_29 Slide179 D218 aSMA_gH2AX 60X Scar 3 arrows	D218	2	4
																						2020_09_29 Slide179 D218 aSMA_gH2AX 60X Scar 3 arrows	D218	2
																						2020_09_29 Slide179 D218 aSMA_gH2AX 60X Scar 3 arrows	D218	1	4
																						2020_09_29 Slide179 D218 aSMA_gH2AX 60X Scar 3 arrows	D218	2	3
																						2020_09_29 Slide179 D218 aSMA_gH2AX 60X Scar 3 arrows	D218		2
																						2020_09_29 Slide179 D218 aSMA_gH2AX 60X Scar 3 arrows	D218		1
																						2020_09_29 Slide179 D218 aSMA_gH2AX 60X Scar 3 arrows	D218	1	4
																						2020_09_29 Slide179 D218 aSMA_gH2AX 60X Scar 4 arrows	D218		2
																						2020_09_29 Slide179 D218 aSMA_gH2AX 60X Scar 4 arrows	D218	1	2
																						2020_09_29 Slide179 D218 aSMA_gH2AX 60X Scar 4 arrows	D218	1	1
																						2020_09_29 Slide179 D218 aSMA_gH2AX 60X Scar 4 arrows	D218	1	1
																						2020_09_29 Slide179 D218 aSMA_gH2AX 60X Scar 4 arrows	D218	1	1
																						2020_09_29 Slide179 D218 aSMA_gH2AX 60X Scar 4 arrows	D218	1	2
																						2020_09_29 Slide179 D218 aSMA_gH2AX 60X Scar 4 arrows	D218	1	5
																						2020_09_29 Slide179 D218 aSMA_gH2AX 60X Scar 4 arrows	D218	1	3
																						2020_09_29 Slide179 D218 aSMA_gH2AX 60X Scar 4 arrows	D218	2
																						2020_09_29 Slide179 D218 aSMA_gH2AX 60X Scar 4 arrows	D218	1
																						2020_09_29 Slide179 D218 aSMA_gH2AX 60X Scar 4 arrows	D218	1
																						2020_09_29 Slide179 D218 aSMA_gH2AX 60X Scar 4 arrows	D218	1	1
																						2020_09_29 Slide179 D218 aSMA_gH2AX 60X Scar 5 arrows	D218	2	1
																						2020_09_29 Slide179 D218 aSMA_gH2AX 60X Scar 5 arrows	D218	1	1
																						2020_09_29 Slide179 D218 aSMA_gH2AX 60X Scar 5 arrows	D218		2
																						2020_09_29 Slide179 D218 aSMA_gH2AX 60X Scar 5 arrows	D218	2	5
																						2020_09_29 Slide179 D218 aSMA_gH2AX 60X Scar 5 arrows	D218	1	1
																						2020_09_29 Slide179 D218 aSMA_gH2AX 60X Scar 5 arrows	D218		4
																						2020_09_29 Slide179 D218 aSMA_gH2AX 60X Scar 5 arrows	D218	1	3
																						2020_09_29 Slide179 D218 aSMA_gH2AX 60X Scar 5 arrows	D218	1
																						2020_09_29 Slide179 D218 aSMA_gH2AX 60X Scar 5 arrows	D218	2
																						2020_09_29 Slide179 D218 aSMA_gH2AX 60X Scar 5 arrows	D218	2	1
																						2020_09_29 Slide179 D218 aSMA_gH2AX 60X Scar 5 arrows	D218	1
																						2020_09_29 Slide179 D218 aSMA_gH2AX 60X Scar 5 arrows	D218	1
																						2020_09_29 Slide180 H962 aSMA_gH2AX 60x Scar 1 arrows	H962	1	2
																						2020_09_29 Slide180 H962 aSMA_gH2AX 60x Scar 1 arrows	H962		3
																						2020_09_29 Slide180 H962 aSMA_gH2AX 60x Scar 1 arrows	H962		2
																						2020_09_29 Slide180 H962 aSMA_gH2AX 60x Scar 1 arrows	H962	1	3
																						2020_09_29 Slide180 H962 aSMA_gH2AX 60x Scar 1 arrows	H962	1	6
																						2020_09_29 Slide180 H962 aSMA_gH2AX 60x Scar 2 arrows	H962	1	1
																						2020_09_29 Slide180 H962 aSMA_gH2AX 60x Scar 2 arrows	H962		1
																						2020_09_29 Slide180 H962 aSMA_gH2AX 60x Scar 3 arrows	H962		3
																						2020_09_29 Slide180 H962 aSMA_gH2AX 60x Scar 3 arrows	H962		1
																						2020_09_29 Slide180 H962 aSMA_gH2AX 60x Scar 4 arrows	H962	1	3
																						2020_09_29 Slide180 H962 aSMA_gH2AX 60x Scar 4 arrows	H962	3
																						2020_09_29 Slide180 H962 aSMA_gH2AX 60x Scar 4 arrows	H962	2	5
																						2020_09_29 Slide180 H962 aSMA_gH2AX 60x Scar 4 arrows	H962	1
																						2020_09_29 Slide180 H962 aSMA_gH2AX 60x Scar 4 arrows	H962	1	1
																						2020_09_29 Slide180 H962 aSMA_gH2AX 60x Scar 4 arrows	H962	1	1
																						2020_09_29 Slide180 H962 aSMA_gH2AX 60x Scar 5 arrows	H962	1
																						2020_09_29 Slide180 H962 aSMA_gH2AX 60x Scar 5 arrows	H962	1
																						2020_09_29 Slide180 H962 aSMA_gH2AX 60x Scar 5 arrows	H962	1
																						2020_09_29 Slide180 H962 aSMA_gH2AX 60x Scar 5 arrows	H962	1
																						2020_09_29 Slide180 H962 aSMA_gH2AX 60x Scar 5 arrows	H962	3	3
																						2020_09_29 Slide180 H962 aSMA_gH2AX 60x Scar 5 arrows	H962		3
																						2020_09_29 Slide180 H962 aSMA_gH2AX 60x Scar 5 arrows	H962	1	1
																						2020_09_29 Slide180 H962 aSMA_gH2AX 60x Scar 5 arrows	H962	1	5
																						2020_09_29 Slide186 F184 aSMA_gH2AX 60X Scar 1 arrows	F184	1	3
																						2020_09_29 Slide186 F184 aSMA_gH2AX 60X Scar 1 arrows	F184	1
																						2020_09_29 Slide186 F184 aSMA_gH2AX 60X Scar 1 arrows	F184	1
																						2020_09_29 Slide186 F184 aSMA_gH2AX 60X Scar 1 arrows	F184	2
																						2020_09_29 Slide186 F184 aSMA_gH2AX 60X Scar 2 arrows	F184		3
																						2020_09_29 Slide186 F184 aSMA_gH2AX 60X Scar 2 arrows	F184		1
																						2020_09_29 Slide186 F184 aSMA_gH2AX 60X Scar 2 arrows	F184		2
																						2020_09_29 Slide186 F184 aSMA_gH2AX 60X Scar 2 arrows	F184		1
																						2020_09_29 Slide186 F184 aSMA_gH2AX 60X Scar 2 arrows	F184		6
																						2020_09_29 Slide186 F184 aSMA_gH2AX 60X Scar 2 arrows	F184		4
																						2020_09_29 Slide186 F184 aSMA_gH2AX 60X Scar 2 arrows	F184		1
																						2020_09_29 Slide186 F184 aSMA_gH2AX 60X Scar 2 arrows	F184		3
																						2020_09_29 Slide186 F184 aSMA_gH2AX 60X Scar 2 arrows	F184		1
																						2020_09_29 Slide186 F184 aSMA_gH2AX 60X Scar 2 arrows	F184	2	4
																						2020_09_29 Slide186 F184 aSMA_gH2AX 60X Scar 2 arrows	F184		1
																						2020_09_29 Slide186 F184 aSMA_gH2AX 60X Scar 2 arrows	F184	1	4
																						2020_09_29 Slide186 F184 aSMA_gH2AX 60X Scar 2 arrows	F184	1	4
																						2020_09_29 Slide186 F184 aSMA_gH2AX 60X Scar 2 arrows	F184		4
																						2020_09_29 Slide186 F184 aSMA_gH2AX 60X Scar 3 arrows	F184		1
																						2020_09_29 Slide186 F184 aSMA_gH2AX 60X Scar 3 arrows	F184		1
																						2020_09_29 Slide186 F184 aSMA_gH2AX 60X Scar 3 arrows	F184		2
																						2020_09_29 Slide186 F184 aSMA_gH2AX 60X Scar 3 arrows	F184		1
																						2020_09_29 Slide186 F184 aSMA_gH2AX 60X Scar 3 arrows	F184		3
																						2020_09_29 Slide186 F184 aSMA_gH2AX 60X Scar 3 arrows	F184		1
																						2020_09_29 Slide186 F184 aSMA_gH2AX 60X Scar 3 arrows	F184		1
																						2020_09_29 Slide186 F184 aSMA_gH2AX 60X Scar 3 arrows	F184		4
																						2020_09_29 Slide186 F184 aSMA_gH2AX 60X Scar 3 arrows	F184		2
																						2020_09_29 Slide186 F184 aSMA_gH2AX 60X Scar 3 arrows	F184	4	4
																						2020_09_29 Slide186 F184 aSMA_gH2AX 60X Scar 3 arrows	F184		6
																						2020_09_29 Slide186 F184 aSMA_gH2AX 60X Scar 3 arrows	F184		5
																						2020_09_29 Slide186 F184 aSMA_gH2AX 60X Scar 4 arrows	F184		1
																						2020_09_29 Slide186 F184 aSMA_gH2AX 60X Scar 4 arrows	F184		1
																						2020_09_29 Slide186 F184 aSMA_gH2AX 60X Scar 4 arrows	F184		1
																						2020_09_29 Slide186 F184 aSMA_gH2AX 60X Scar 4 arrows	F184		1
																						2020_09_29 Slide186 F184 aSMA_gH2AX 60X Scar 4 arrows	F184	2	6
																						2020_09_29 Slide186 F184 aSMA_gH2AX 60X Scar 5 arrows	F184	1	8
																						2020_09_29 Slide186 F184 aSMA_gH2AX 60X Scar 5 arrows	F184	1
																						2020_09_29 Slide186 F184 aSMA_gH2AX 60X Scar 5 arrows	F184	1
																						2020_09_29 Slide186 F184 aSMA_gH2AX 60X Scar 5 arrows	F184	1
																						2020_09_29 Slide186 F184 aSMA_gH2AX 60X Scar 5 arrows	F184	1
																						2020_10_01 Slide185 5043 aSMA_gH2AX 60x Scar 2 arrows	5043	1
																						2020_10_01 Slide185 5043 aSMA_gH2AX 60x Scar 2 arrows	5043	1
																						2020_10_01 Slide185 5043 aSMA_gH2AX 60x Scar 2 arrows	5043	1
																						2020_10_01 Slide185 5043 aSMA_gH2AX 60x Scar 2 arrows	5043	2
																						2020_10_01 Slide185 5043 aSMA_gH2AX 60x Scar 2 arrows	5043	1
																						2020_10_01 Slide185 5043 aSMA_gH2AX 60x Scar 2 arrows	5043	1	5
																						2020_10_01 Slide185 5043 aSMA_gH2AX 60x Scar 2 arrows	5043	1
																						2020_10_01 Slide185 5043 aSMA_gH2AX 60x Scar 2 arrows	5043	1
																						2020_10_01 Slide185 5043 aSMA_gH2AX 60x Scar 2 arrows	5043	1
																						2020_10_01 Slide185 5043 aSMA_gH2AX 60x Scar 2 arrows	5043	1
																						2020_10_01 Slide185 5043 aSMA_gH2AX 60x Scar 2 arrows	5043	1
																						2020_10_01 Slide185 5043 aSMA_gH2AX 60x Scar 3 arrows	5043		2
																						2020_10_01 Slide185 5043 aSMA_gH2AX 60x Scar 3 arrows	5043		1
																						2020_10_01 Slide185 5043 aSMA_gH2AX 60x Scar 3 arrows	5043	2	1
																						2020_10_01 Slide185 5043 aSMA_gH2AX 60x Scar 3 arrows	5043	2	1
																						2020_10_01 Slide185 5043 aSMA_gH2AX 60x Scar 4 arrows	5043	1
																						2020_10_01 Slide185 5043 aSMA_gH2AX 60x Scar 4 arrows	5043	1
																						2020_10_01 Slide185 5043 aSMA_gH2AX 60x Scar 4 arrows	5043	1
																						2020_10_01 Slide185 5043 aSMA_gH2AX 60x Scar 4 arrows	5043	1
																						2020_10_01 Slide185 5043 aSMA_gH2AX 60x Scar 4 arrows	5043	1
																						2020_10_01 Slide185 5043 aSMA_gH2AX 60x Scar 4 arrows	5043	1
																						2020_10_01 Slide185 5043 aSMA_gH2AX 60x Scar 4 arrows	5043	1
																						2020_10_01 Slide186 X245 aSMA_gH2AX 60x Scar 1 arrows	X245	2	3
																						2020_10_01 Slide186 X245 aSMA_gH2AX 60x Scar 1 arrows	X245		2
																						2020_10_01 Slide186 X245 aSMA_gH2AX 60x Scar 1 arrows	X245		1
																						2020_10_01 Slide186 X245 aSMA_gH2AX 60x Scar 1 arrows	X245		1
																						2020_10_01 Slide186 X245 aSMA_gH2AX 60x Scar 1 arrows	X245		3
																						2020_10_01 Slide186 X245 aSMA_gH2AX 60x Scar 1 arrows	X245	1	2
																						2020_10_01 Slide186 X245 aSMA_gH2AX 60x Scar 1 arrows	X245	1
																						2020_10_01 Slide186 X245 aSMA_gH2AX 60x Scar 1 arrows	X245	1
																						2020_10_01 Slide185 5043 aSMA_gH2AX 60x Scar 5 arrows	5043	1
																						2020_10_01 Slide185 5043 aSMA_gH2AX 60x Scar 5 arrows	5043	2	3
																						2020_10_01 Slide186 X245 aSMA_gH2AX 60x Scar 2 arrows	X245	3	5
																						2020_10_01 Slide186 X245 aSMA_gH2AX 60x Scar 2 arrows	X245		5
																						2020_10_01 Slide186 X245 aSMA_gH2AX 60x Scar 2 arrows	X245	1	4
																						2020_10_01 Slide186 X245 aSMA_gH2AX 60x Scar 3 arrows	X245	1
																						2020_10_01 Slide186 X245 aSMA_gH2AX 60x Scar 3 arrows	X245	1	1
																						2020_10_01 Slide186 X245 aSMA_gH2AX 60x Scar 3 arrows	X245	2	6
																						2020_10_01 Slide186 X245 aSMA_gH2AX 60x Scar 3 arrows	X245		1
																						2020_10_01 Slide186 X245 aSMA_gH2AX 60x Scar 3 arrows	X245	1	3
																						2020_10_01 Slide186 X245 aSMA_gH2AX 60x Scar 3 arrows	X245	1	3
																						2020_10_01 Slide186 X245 aSMA_gH2AX 60x Scar 4 arrows	X245	1	1
																						2020_10_01 Slide186 X245 aSMA_gH2AX 60x Scar 4 arrows	X245	1	3
																						2020_10_01 Slide186 X245 aSMA_gH2AX 60x Scar 4 arrows	X245	2
																						2020_10_01 Slide186 X245 aSMA_gH2AX 60x Scar 4 arrows	X245	1
																						2020_10_01 Slide186 X245 aSMA_gH2AX 60x Scar 4 arrows	X245	2
																						2020_10_01 Slide186 X245 aSMA_gH2AX 60x Scar 4 arrows	X245	2	3
																						2020_10_01 Slide186 X245 aSMA_gH2AX 60x Scar 5 arrows	X245	1
																						2020_10_01 Slide186 X245 aSMA_gH2AX 60x Scar 5 arrows	X245	1
																						2020_10_01 Slide186 X245 aSMA_gH2AX 60x Scar 5 arrows	X245	2	2
																						2020_10_01 Slide186 X245 aSMA_gH2AX 60x Scar 5 arrows	X245	2	4
																						2020_10_01 Slide186 X245 aSMA_gH2AX 60x Scar 5 arrows	X245	1	3
																						2020_10_01 Slide186 X245 aSMA_gH2AX 60x Scar 5 arrows	X245	3
																						2020_10_01 Slide186 X245 aSMA_gH2AX 60x Scar 5 arrows	X245	2
																						2020_10_01 Slide186 X245 aSMA_gH2AX 60x Scar 5 arrows	X245	2	1
																						2020_10_01 Slide186 X245 aSMA_gH2AX 60x Scar 5 arrows	X245	1
																						2020_10_01 Slide186 X245 aSMA_gH2AX 60x Scar 5 arrows	X245	1
																						2020_10_01 Slide186 X245 aSMA_gH2AX 60x Scar 5 arrows	X245	1
																						2020_10_01 Slide186 X245 aSMA_gH2AX 60x Scar 5 arrows	X245	1
																						2020_10_04 Slide184 F949 aSMA_gH2AX 60x Scar 1 arrows	F949	2
																						2020_10_04 Slide184 F949 aSMA_gH2AX 60x Scar 1 arrows	F949	1	4
																						2020_10_04 Slide184 F949 aSMA_gH2AX 60x Scar 1 arrows	F949	1	3
																						2020_10_04 Slide184 F949 aSMA_gH2AX 60x Scar 1 arrows	F949	1	1
																						2020_10_04 Slide184 F949 aSMA_gH2AX 60x Scar 1 arrows	F949	2
																						2020_10_04 Slide184 F949 aSMA_gH2AX 60x Scar 1 arrows	F949	2
																						2020_10_04 Slide184 F949 aSMA_gH2AX 60x Scar 2 arrows	F949	2	3
																						2020_10_04 Slide184 F949 aSMA_gH2AX 60x Scar 2 arrows	F949	1
																						2020_10_04 Slide184 F949 aSMA_gH2AX 60x Scar 2 arrows	F949	3	3
																						2020_10_04 Slide184 F949 aSMA_gH2AX 60x Scar 2 arrows	F949	1
																						2020_10_04 Slide184 F949 aSMA_gH2AX 60x Scar 2 arrows	F949	1
																						2020_10_04 Slide184 F949 aSMA_gH2AX 60x Scar 2 arrows	F949	2
																						2020_10_04 Slide184 F949 aSMA_gH2AX 60x Scar 2 arrows	F949	1
																						2020_10_04 Slide184 F949 aSMA_gH2AX 60x Scar 2 arrows	F949	2	4
																						2020_10_04 Slide184 F949 aSMA_gH2AX 60x Scar 2 arrows	F949	1
																						2020_10_04 Slide184 F949 aSMA_gH2AX 60x Scar 2 arrows	F949	3
																						2020_10_04 Slide184 F949 aSMA_gH2AX 60x Scar 2 arrows	F949	1	1
																						2020_10_04 Slide184 F949 aSMA_gH2AX 60x Scar 3 arrows	F949		1
																						2020_10_04 Slide184 F949 aSMA_gH2AX 60x Scar 3 arrows	F949		4
																						2020_10_04 Slide184 F949 aSMA_gH2AX 60x Scar 3 arrows	F949		6
																						2020_10_04 Slide184 F949 aSMA_gH2AX 60x Scar 3 arrows	F949	1	3
																						2020_10_04 Slide184 F949 aSMA_gH2AX 60x Scar 4 arrows	F949	2	3
																						2020_10_04 Slide184 F949 aSMA_gH2AX 60x Scar 4 arrows	F949	1
																						2020_10_04 Slide184 F949 aSMA_gH2AX 60x Scar 4 arrows	F949	3
																						2020_10_04 Slide184 F949 aSMA_gH2AX 60x Scar 4 arrows	F949	2
																						2020_10_04 Slide184 F949 aSMA_gH2AX 60x Scar 4 arrows	F949	1
																						2020_10_04 Slide184 F949 aSMA_gH2AX 60x Scar 5 arrows	F949	2
																						2020_10_04 Slide184 F949 aSMA_gH2AX 60x Scar 5 arrows	F949	1
																						2020_10_04 Slide184 F949 aSMA_gH2AX 60x Scar 5 arrows	F949	1
																						2020_10_04 Slide184 F949 aSMA_gH2AX 60x Scar 5 arrows	F949	1
																						2020_10_04 Slide184 F949 aSMA_gH2AX 60x Scar 5 arrows	F949	2
																						2020_10_04 Slide184 F949 aSMA_gH2AX 60x Scar 5 arrows	F949	1
																						2020_10_04 Slide184 F949 aSMA_gH2AX 60x Scar 5 arrows	F949	1
																						2020_10_04 Slide184 F949 aSMA_gH2AX 60x Scar 5 arrows	F949	1
																						2020_10_04 Slide184 F949 aSMA_gH2AX 60x Scar 5 arrows	F949	1
																						2020_10_04 Slide184 F949 aSMA_gH2AX 60x Scar 5 arrows	F949	2
																						2020_10_04 Slide187 F981 aSMA_gH2AX 60x Scar 1 arrows	F981	1	7
																						2020_10_04 Slide187 F981 aSMA_gH2AX 60x Scar 1 arrows	F981	1	2
																						2020_10_04 Slide187 F981 aSMA_gH2AX 60x Scar 1 arrows	F981	2	2
																						2020_10_04 Slide187 F981 aSMA_gH2AX 60x Scar 1 arrows	F981		2
																						2020_10_04 Slide187 F981 aSMA_gH2AX 60x Scar 1 arrows	F981		1
																						2020_10_04 Slide187 F981 aSMA_gH2AX 60x Scar 1 arrows	F981		1
																						2020_10_04 Slide187 F981 aSMA_gH2AX 60x Scar 1 arrows	F981		1
																						2020_10_04 Slide187 F981 aSMA_gH2AX 60x Scar 1 arrows	F981		11
																						2020_10_04 Slide187 F981 aSMA_gH2AX 60x Scar 1 arrows	F981		2
																						2020_10_04 Slide187 F981 aSMA_gH2AX 60x Scar 1 arrows	F981		2
																						2020_10_04 Slide187 F981 aSMA_gH2AX 60x Scar 1 arrows	F981		2
																						2020_10_04 Slide187 F981 aSMA_gH2AX 60x Scar 1 arrows	F981		2
																						2020_10_04 Slide187 F981 aSMA_gH2AX 60x Scar 1 arrows	F981		1
																						2020_10_04 Slide187 F981 aSMA_gH2AX 60x Scar 1 arrows	F981		7
																						2020_10_04 Slide187 F981 aSMA_gH2AX 60x Scar 1 arrows	F981		1
																						2020_10_04 Slide187 F981 aSMA_gH2AX 60x Scar 1 arrows	F981		2
																						2020_10_04 Slide187 F981 aSMA_gH2AX 60x Scar 2 arrows	F981		2
																						2020_10_04 Slide187 F981 aSMA_gH2AX 60x Scar 2 arrows	F981		5
																						2020_10_04 Slide187 F981 aSMA_gH2AX 60x Scar 2 arrows	F981		1
																						2020_10_04 Slide187 F981 aSMA_gH2AX 60x Scar 3 arrows	F981	1	8
																						2020_10_04 Slide187 F981 aSMA_gH2AX 60x Scar 3 arrows	F981	1	4
																						2020_10_04 Slide187 F981 aSMA_gH2AX 60x Scar 3 arrows	F981	2	1
																						2020_10_04 Slide187 F981 aSMA_gH2AX 60x Scar 3 arrows	F981	2	2
																						2020_10_04 Slide187 F981 aSMA_gH2AX 60x Scar 3 arrows	F981	2	1
																						2020_10_04 Slide187 F981 aSMA_gH2AX 60x Scar 3 arrows	F981	1	1
																						2020_10_04 Slide187 F981 aSMA_gH2AX 60x Scar 3 arrows	F981		1
																						2020_10_04 Slide187 F981 aSMA_gH2AX 60x Scar 3 arrows	F981		2
																						2020_10_04 Slide187 F981 aSMA_gH2AX 60x Scar 3 arrows	F981		1
																						2020_10_04 Slide187 F981 aSMA_gH2AX 60x Scar 3 arrows	F981		1
																						2020_10_04 Slide187 F981 aSMA_gH2AX 60x Scar 3 arrows	F981		5
																						2020_10_04 Slide187 F981 aSMA_gH2AX 60x Scar 3 arrows	F981		1
																						2020_10_04 Slide187 F981 aSMA_gH2AX 60x Scar 3 arrows	F981		1
																						2020_10_04 Slide187 F981 aSMA_gH2AX 60x Scar 4 arrows	F981	1	1
																						2020_10_04 Slide187 F981 aSMA_gH2AX 60x Scar 4 arrows	F981	1
																						2020_10_04 Slide187 F981 aSMA_gH2AX 60x Scar 4 arrows	F981	1
																						2020_10_04 Slide187 F981 aSMA_gH2AX 60x Scar 4 arrows	F981	1	5
																						2020_10_04 Slide187 F981 aSMA_gH2AX 60x Scar 5 arrows	F981	4
																						2020_10_04 Slide187 F981 aSMA_gH2AX 60x Scar 5 arrows	F981	1	3
																						2020_10_04 Slide187 F981 aSMA_gH2AX 60x Scar 5 arrows	F981		2
																						2020_10_04 Slide187 F981 aSMA_gH2AX 60x Scar 5 arrows	F981		2
																						2020_10_04 Slide187 F981 aSMA_gH2AX 60x Scar 5 arrows	F981		1
																						2020_10_04 Slide187 F981 aSMA_gH2AX 60x Scar 5 arrows	F981		1
																						2020_10_04 Slide187 F981 aSMA_gH2AX 60x Scar 5 arrows	F981		1
																						2020_10_04 Slide187 F981 aSMA_gH2AX 60x Scar 5 arrows	F981		1
																						2020_10_04 Slide187 F981 aSMA_gH2AX 60x Scar 5 arrows	F981		1
																						2020_10_04 Slide187 F981 aSMA_gH2AX 60x Scar 5 arrows	F981		1
																						2020_10_04 Slide187 F981 aSMA_gH2AX 60x Scar 5 arrows	F981		1
																						2020_10_04 Slide187 F981 aSMA_gH2AX 60x Scar 5 arrows	F981		5
																						2020_10_04 Slide187 F981 aSMA_gH2AX 60x Scar 5 arrows	F981		3
																						2020_10_04 Slide187 F981 aSMA_gH2AX 60x Scar 5 arrows	F981		1
																						2020_10_04 Slide187 F981 aSMA_gH2AX 60x Scar 5 arrows	F981		1
																						2020_10_04 Slide187 F981 aSMA_gH2AX 60x Scar 5 arrows	F981		1
																						2020_10_04 Slide187 F981 aSMA_gH2AX 60x Scar 5 arrows	F981	1	4
																						2020_10_04 Slide187 F981 aSMA_gH2AX 60x Scar 5 arrows	F981	1	5
																						2020_10_04 Slide187 F981 aSMA_gH2AX 60x Scar 5 arrows	F981		2
																						2020_10_04 Slide187 F981 aSMA_gH2AX 60x Scar 5 arrows	F981		1
																						2020_10_04 Slide187 F981 aSMA_gH2AX 60x Scar 5 arrows	F981		3
																						2020_10_04 Slide191 X228 aSMA_gH2AX 60x Scar 1 arrows	X228	3
																						2020_10_04 Slide191 X228 aSMA_gH2AX 60x Scar 1 arrows	X228	2
																						2020_10_04 Slide191 X228 aSMA_gH2AX 60x Scar 1 arrows	X228	1
																						2020_10_04 Slide191 X228 aSMA_gH2AX 60x Scar 1 arrows	X228	1
																						2020_10_04 Slide191 X228 aSMA_gH2AX 60x Scar 1 arrows	X228	1
																						2020_10_04 Slide191 X228 aSMA_gH2AX 60x Scar 1 arrows	X228	1
																						2020_10_04 Slide191 X228 aSMA_gH2AX 60x Scar 1 arrows	X228	2
																						2020_10_04 Slide191 X228 aSMA_gH2AX 60x Scar 1 arrows	X228	2
																						2020_10_04 Slide191 X228 aSMA_gH2AX 60x Scar 1 arrows	X228	1
																						2020_10_04 Slide191 X228 aSMA_gH2AX 60x Scar 2 arrows	X228	4
																						2020_10_04 Slide191 X228 aSMA_gH2AX 60x Scar 2 arrows	X228	1
																						2020_10_04 Slide191 X228 aSMA_gH2AX 60x Scar 2 arrows	X228	1
																						2020_10_04 Slide191 X228 aSMA_gH2AX 60x Scar 2 arrows	X228	2
																						2020_10_04 Slide191 X228 aSMA_gH2AX 60x Scar 2 arrows	X228	2
																						2020_10_04 Slide191 X228 aSMA_gH2AX 60x Scar 3 arrows	X228	1	4
																						2020_10_04 Slide191 X228 aSMA_gH2AX 60x Scar 3 arrows	X228	1	3
																						2020_10_04 Slide191 X228 aSMA_gH2AX 60x Scar 3 arrows	X228	1
																						2020_10_04 Slide191 X228 aSMA_gH2AX 60x Scar 3 arrows	X228	1
																						2020_10_04 Slide191 X228 aSMA_gH2AX 60x Scar 3 arrows	X228	2
																						2020_10_04 Slide191 X228 aSMA_gH2AX 60x Scar 3 arrows	X228	4
																						2020_10_04 Slide191 X228 aSMA_gH2AX 60x Scar 3 arrows	X228	1
																						2020_10_04 Slide191 X228 aSMA_gH2AX 60x Scar 3 arrows	X228	1	1
																						2020_10_04 Slide191 X228 aSMA_gH2AX 60x Scar 4 arrows	X228	2
																						2020_10_04 Slide191 X228 aSMA_gH2AX 60x Scar 4 arrows	X228	1
																						2020_10_04 Slide191 X228 aSMA_gH2AX 60x Scar 4 arrows	X228	1
																						2020_10_04 Slide191 X228 aSMA_gH2AX 60x Scar 4 arrows	X228	1
																						2020_10_04 Slide191 X228 aSMA_gH2AX 60x Scar 4 arrows	X228	6
																						2020_10_04 Slide191 X228 aSMA_gH2AX 60x Scar 4 arrows	X228	1
																						2020_10_04 Slide191 X228 aSMA_gH2AX 60x Scar 4 arrows	X228	1
																						2020_10_04 Slide191 X228 aSMA_gH2AX 60x Scar 4 arrows	X228	1
																						2020_10_04 Slide191 X228 aSMA_gH2AX 60x Scar 4 arrows	X228	1
																						2020_10_04 Slide191 X228 aSMA_gH2AX 60x Scar 4 arrows	X228	2
																						2020_10_04 Slide191 X228 aSMA_gH2AX 60x Scar 4 arrows	X228	1
																						2020_10_04 Slide191 X228 aSMA_gH2AX 60x Scar 5 arrows	X228	1
																						2020_10_04 Slide191 X228 aSMA_gH2AX 60x Scar 5 arrows	X228	3
																						2020_10_04 Slide191 X228 aSMA_gH2AX 60x Scar 5 arrows	X228	1
																						2020_10_04 Slide191 X228 aSMA_gH2AX 60x Scar 5 arrows	X228	1
																						2020_10_04 Slide191 X228 aSMA_gH2AX 60x Scar 5 arrows	X228	1
																						2020_10_04 Slide191 X228 aSMA_gH2AX 60x Scar 5 arrows	X228	2
																						2020_10_04 Slide191 X228 aSMA_gH2AX 60x Scar 5 arrows	X228	1
																						2020_10_04 Slide191 X228 aSMA_gH2AX 60x Scar 5 arrows	X228	2
																						2020_10_04 Slide191 X228 aSMA_gH2AX 60x Scar 5 arrows	X228	1
																						2020_10_04 Slide191 X228 aSMA_gH2AX 60x Scar 5 arrows	X228	1
																						2020_10_04 Slide191 X228 aSMA_gH2AX 60x Scar 5 arrows	X228	1
																						2020_10_04 Slide191 X228 aSMA_gH2AX 60x Scar 5 arrows	X228	1
																						2020_10_04 Slide191 X228 aSMA_gH2AX 60x Scar 5 arrows	X228	2
																						2020_10_04 Slide191 X228 aSMA_gH2AX 60x Scar 5 arrows	X228	1
																						2020_10_04 Slide191 X228 aSMA_gH2AX 60x Scar 5 arrows	X228	3
																						2020_10_04 Slide191 X228 aSMA_gH2AX 60x Scar 5 arrows	X228	1
																						2020_10_04 Slide192 X230 aSMA_gH2AX 60x Scar 1 arrows	X230	1
																						2020_10_04 Slide192 X230 aSMA_gH2AX 60x Scar 1 arrows	X230	1
																						2020_10_04 Slide192 X230 aSMA_gH2AX 60x Scar 1 arrows	X230	1
																						2020_10_04 Slide192 X230 aSMA_gH2AX 60x Scar 2 arrows	X230	1
																						2020_10_04 Slide192 X230 aSMA_gH2AX 60x Scar 2 arrows	X230	1
																						2020_10_04 Slide192 X230 aSMA_gH2AX 60x Scar 2 arrows	X230	1
																						2020_10_04 Slide192 X230 aSMA_gH2AX 60x Scar 2 arrows	X230	1
																						2020_10_04 Slide192 X230 aSMA_gH2AX 60x Scar 2 arrows	X230	1
																						2020_10_04 Slide192 X230 aSMA_gH2AX 60x Scar 2 arrows	X230	2
																						2020_10_04 Slide192 X230 aSMA_gH2AX 60x Scar 2 arrows	X230	1
																						2020_10_04 Slide192 X230 aSMA_gH2AX 60x Scar 2 arrows	X230	1
																						2020_10_04 Slide192 X230 aSMA_gH2AX 60x Scar 2 arrows	X230	1
																						2020_10_04 Slide192 X230 aSMA_gH2AX 60x Scar 2 arrows	X230	3
																						2020_10_04 Slide192 X230 aSMA_gH2AX 60x Scar 2 arrows	X230	1
																						2020_10_04 Slide192 X230 aSMA_gH2AX 60x Scar 3 arrows	X230	1
																						2020_10_04 Slide192 X230 aSMA_gH2AX 60x Scar 3 arrows	X230	2
																						2020_10_04 Slide192 X230 aSMA_gH2AX 60x Scar 3 arrows	X230	1
																						2020_10_04 Slide192 X230 aSMA_gH2AX 60x Scar 3 arrows	X230	2
																						2020_10_04 Slide192 X230 aSMA_gH2AX 60x Scar 3 arrows	X230	1
																						2020_10_04 Slide192 X230 aSMA_gH2AX 60x Scar 3 arrows	X230	2
																						2020_10_04 Slide192 X230 aSMA_gH2AX 60x Scar 3 arrows	X230	1
																						2020_10_04 Slide192 X230 aSMA_gH2AX 60x Scar 3 arrows	X230	2
																						2020_10_04 Slide192 X230 aSMA_gH2AX 60x Scar 3 arrows	X230	1
																						2020_10_04 Slide192 X230 aSMA_gH2AX 60x Scar 4 arrows	X230	1	1
																						2020_10_04 Slide192 X230 aSMA_gH2AX 60x Scar 5 arrows	X230	1
																						2020_10_04 Slide192 X230 aSMA_gH2AX 60x Scar 5 arrows	X230	6
																						2020_10_04 Slide192 X230 aSMA_gH2AX 60x Scar 5 arrows	X230	1
																						2020_10_04 Slide192 X230 aSMA_gH2AX 60x Scar 5 arrows	X230	2	1
																						2020_10_04 Slide192 X230 aSMA_gH2AX 60x Scar 5 arrows	X230	1
																						2020_10_04 Slide193 3890 aSMA_gH2AX 60x Scar 1 arrows	3890	2	1
																						2020_10_04 Slide193 3890 aSMA_gH2AX 60x Scar 1 arrows	3890	1
																						2020_10_04 Slide193 3890 aSMA_gH2AX 60x Scar 1 arrows	3890	1
																						2020_10_04 Slide193 3890 aSMA_gH2AX 60x Scar 1 arrows	3890	1	1
																						2020_10_04 Slide193 3890 aSMA_gH2AX 60x Scar 1 arrows	3890	2	1
																						2020_10_04 Slide193 3890 aSMA_gH2AX 60x Scar 1 arrows	3890	1
																						2020_10_04 Slide193 3890 aSMA_gH2AX 60x Scar 1 arrows	3890	6
																						2020_10_04 Slide193 3890 aSMA_gH2AX 60x Scar 1 arrows	3890	1
																						2020_10_04 Slide193 3890 aSMA_gH2AX 60x Scar 2 arrows	3890	1
																						2020_10_04 Slide193 3890 aSMA_gH2AX 60x Scar 2 arrows	3890	2	2
																						2020_10_04 Slide193 3890 aSMA_gH2AX 60x Scar 2 arrows	3890	2	1
																						2020_10_04 Slide193 3890 aSMA_gH2AX 60x Scar 3 arrows	3890	1
																						2020_10_04 Slide193 3890 aSMA_gH2AX 60x Scar 3 arrows	3890	1	3
																						2020_10_04 Slide193 3890 aSMA_gH2AX 60x Scar 3 arrows	3890	2
																						2020_10_04 Slide193 3890 aSMA_gH2AX 60x Scar 3 arrows	3890	1
																						2020_10_04 Slide193 3890 aSMA_gH2AX 60x Scar 4 arrows	3890	1
																						2020_10_04 Slide193 3890 aSMA_gH2AX 60x Scar 4 arrows	3890	1
																						2020_10_04 Slide193 3890 aSMA_gH2AX 60x Scar 4 arrows	3890	1
																						2020_10_04 Slide193 3890 aSMA_gH2AX 60x Scar 4 arrows	3890	2	4
																						2020_10_04 Slide193 3890 aSMA_gH2AX 60x Scar 4 arrows	3890	1	1
																						2020_10_04 Slide193 3890 aSMA_gH2AX 60x Scar 4 arrows	3890	1
																						2020_10_04 Slide193 3890 aSMA_gH2AX 60x Scar 5 arrows	3890	2
																						2020_10_04 Slide193 3890 aSMA_gH2AX 60x Scar 5 arrows	3890	2
																						2020_10_04 Slide193 3890 aSMA_gH2AX 60x Scar 5 arrows	3890	1
																						2020_10_04 Slide193 3890 aSMA_gH2AX 60x Scar 5 arrows	3890	1
																						2020_10_04 Slide193 3890 aSMA_gH2AX 60x Scar 5 arrows	3890	1
																						2020_10_04 Slide193 3890 aSMA_gH2AX 60x Scar 5 arrows	3890	1
																						2020_10_04 Slide193 3890 aSMA_gH2AX 60x Scar 5 arrows	3890	2
																						2020_10_04 Slide193 3890 aSMA_gH2AX 60x Scar 5 arrows	3890	2
																						2020_10_04 Slide193 3890 aSMA_gH2AX 60x Scar 5 arrows	3890	4	2
																						2020_10_04 Slide193 3890 aSMA_gH2AX 60x Scar 5 arrows	3890	1	1
																						2020_10_09 Slide198 B1149 aSMA_gH2AX 60x Scar 1 arros	B1149	4
																						2020_10_09 Slide198 B1149 aSMA_gH2AX 60x Scar 1 arros	B1149	6
																						2020_10_09 Slide198 B1149 aSMA_gH2AX 60x Scar 1 arros	B1149	2
																						2020_10_09 Slide198 B1149 aSMA_gH2AX 60x Scar 1 arros	B1149	3
																						2020_10_09 Slide198 B1149 aSMA_gH2AX 60x Scar 1 arros	B1149	1
																						2020_10_09 Slide198 B1149 aSMA_gH2AX 60x Scar 1 arros	B1149	3
																						2020_10_09 Slide198 B1149 aSMA_gH2AX 60x Scar 1 arros	B1149	2
																						2020_10_09 Slide198 B1149 aSMA_gH2AX 60x Scar 1 arros	B1149	3
																						2020_10_09 Slide198 B1149 aSMA_gH2AX 60x Scar 1 arros	B1149	3
																						2020_10_09 Slide198 B1149 aSMA_gH2AX 60x Scar 1 arros	B1149	5	2
																						2020_10_09 Slide198 B1149 aSMA_gH2AX 60x Scar 1 arros	B1149	6	3
																						2020_10_09 Slide198 B1149 aSMA_gH2AX 60x Scar 1 arros	B1149	1
																						2020_10_09 Slide198 B1149 aSMA_gH2AX 60x Scar 1 arros	B1149	1
																						2020_10_09 Slide198 B1149 aSMA_gH2AX 60x Scar 1 arros	B1149	2
																						2020_10_09 Slide198 B1149 aSMA_gH2AX 60x Scar 1 arros	B1149	6
																						2020_10_09 Slide198 B1149 aSMA_gH2AX 60x Scar 1 arros	B1149	1
																						2020_10_09 Slide198 B1149 aSMA_gH2AX 60x Scar 1 arros	B1149	1
																						2020_10_09 Slide198 B1149 aSMA_gH2AX 60x Scar 1 arros	B1149	1
																						2020_10_09 Slide198 B1149 aSMA_gH2AX 60x Scar 1 arros	B1149	3
																						2020_10_09 Slide198 B1149 aSMA_gH2AX 60x Scar 1 arros	B1149	4
																						2020_10_09 Slide198 B1149 aSMA_gH2AX 60x Scar 1 arros	B1149	1
																						2020_10_09 Slide198 B1149 aSMA_gH2AX 60x Scar 1 arros	B1149	1
																						2020_10_09 Slide198 B1149 aSMA_gH2AX 60x Scar 1 arros	B1149	5
																						2020_10_09 Slide198 B1149 aSMA_gH2AX 60x Scar 1 arros	B1149	1
																						2020_10_09 Slide198 B1149 aSMA_gH2AX 60x Scar 2 arrows	B1149	1
																						2020_10_09 Slide198 B1149 aSMA_gH2AX 60x Scar 2 arrows	B1149	5
																						2020_10_09 Slide198 B1149 aSMA_gH2AX 60x Scar 2 arrows	B1149	2
																						2020_10_09 Slide198 B1149 aSMA_gH2AX 60x Scar 2 arrows	B1149	2
																						2020_10_09 Slide198 B1149 aSMA_gH2AX 60x Scar 2 arrows	B1149	3
																						2020_10_09 Slide198 B1149 aSMA_gH2AX 60x Scar 2 arrows	B1149	1
																						2020_10_09 Slide198 B1149 aSMA_gH2AX 60x Scar 2 arrows	B1149	2
																						2020_10_09 Slide198 B1149 aSMA_gH2AX 60x Scar 2 arrows	B1149	2
																						2020_10_09 Slide198 B1149 aSMA_gH2AX 60x Scar 2 arrows	B1149	1
																						2020_10_09 Slide198 B1149 aSMA_gH2AX 60x Scar 2 arrows	B1149	1
																						2020_10_09 Slide198 B1149 aSMA_gH2AX 60x Scar 2 arrows	B1149	6
																						2020_10_09 Slide198 B1149 aSMA_gH2AX 60x Scar 2 arrows	B1149	4
																						2020_10_09 Slide198 B1149 aSMA_gH2AX 60x Scar 2 arrows	B1149	2
																						2020_10_09 Slide198 B1149 aSMA_gH2AX 60x Scar 2 arrows	B1149	1
																						2020_10_09 Slide198 B1149 aSMA_gH2AX 60x Scar 2 arrows	B1149	2
																						2020_10_09 Slide198 B1149 aSMA_gH2AX 60x Scar 2 arrows	B1149	1
																						2020_10_09 Slide198 B1149 aSMA_gH2AX 60x Scar 2 arrows	B1149	1
																						2020_10_09 Slide198 B1149 aSMA_gH2AX 60x Scar 2 arrows	B1149	2
																						2020_10_09 Slide198 B1149 aSMA_gH2AX 60x Scar 2 arrows	B1149	1
																						2020_10_09 Slide198 B1149 aSMA_gH2AX 60x Scar 2 arrows	B1149	1
																						2020_10_09 Slide198 B1149 aSMA_gH2AX 60x Scar 3 arrows	B1149	4
																						2020_10_09 Slide198 B1149 aSMA_gH2AX 60x Scar 3 arrows	B1149	6
																						2020_10_09 Slide198 B1149 aSMA_gH2AX 60x Scar 3 arrows	B1149	4
																						2020_10_09 Slide198 B1149 aSMA_gH2AX 60x Scar 3 arrows	B1149	5
																						2020_10_09 Slide198 B1149 aSMA_gH2AX 60x Scar 3 arrows	B1149	3
																						2020_10_09 Slide198 B1149 aSMA_gH2AX 60x Scar 3 arrows	B1149	3
																						2020_10_09 Slide198 B1149 aSMA_gH2AX 60x Scar 3 arrows	B1149	1
																						2020_10_09 Slide198 B1149 aSMA_gH2AX 60x Scar 3 arrows	B1149	3
																						2020_10_09 Slide198 B1149 aSMA_gH2AX 60x Scar 3 arrows	B1149	3
																						2020_10_09 Slide198 B1149 aSMA_gH2AX 60x Scar 3 arrows	B1149	3
																						2020_10_09 Slide198 B1149 aSMA_gH2AX 60x Scar 3 arrows	B1149	4
																						2020_10_09 Slide198 B1149 aSMA_gH2AX 60x Scar 3 arrows	B1149	3
																						2020_10_09 Slide198 B1149 aSMA_gH2AX 60x Scar 3 arrows	B1149	3
																						2020_10_09 Slide198 B1149 aSMA_gH2AX 60x Scar 3 arrows	B1149	2
																						2020_10_09 Slide198 B1149 aSMA_gH2AX 60x Scar 3 arrows	B1149	1
																						2020_10_09 Slide198 B1149 aSMA_gH2AX 60x Scar 3 arrows	B1149	2
																						2020_10_09 Slide198 B1149 aSMA_gH2AX 60x Scar 4 arrows	B1149	5
																						2020_10_09 Slide198 B1149 aSMA_gH2AX 60x Scar 4 arrows	B1149	2
																						2020_10_09 Slide198 B1149 aSMA_gH2AX 60x Scar 4 arrows	B1149	4
																						2020_10_09 Slide198 B1149 aSMA_gH2AX 60x Scar 4 arrows	B1149	1
																						2020_10_09 Slide198 B1149 aSMA_gH2AX 60x Scar 4 arrows	B1149	8
																						2020_10_09 Slide198 B1149 aSMA_gH2AX 60x Scar 4 arrows	B1149	2
																						2020_10_09 Slide198 B1149 aSMA_gH2AX 60x Scar 4 arrows	B1149	1
																						2020_10_09 Slide198 B1149 aSMA_gH2AX 60x Scar 4 arrows	B1149	1
																						2020_10_09 Slide198 B1149 aSMA_gH2AX 60x Scar 4 arrows	B1149	3
																						2020_10_09 Slide198 B1149 aSMA_gH2AX 60x Scar 4 arrows	B1149	1
																						2020_10_09 Slide198 B1149 aSMA_gH2AX 60x Scar 4 arrows	B1149	3
																						2020_10_09 Slide198 B1149 aSMA_gH2AX 60x Scar 4 arrows	B1149	2
																						2020_10_09 Slide198 B1149 aSMA_gH2AX 60x Scar 4 arrows	B1149	3
																						2020_10_09 Slide198 B1149 aSMA_gH2AX 60x Scar 4 arrows	B1149	1	2
																						2020_10_09 Slide198 B1149 aSMA_gH2AX 60x Scar 4 arrows	B1149	6	3
																						2020_10_09 Slide198 B1149 aSMA_gH2AX 60x Scar 4 arrows	B1149	1
																						2020_10_09 Slide198 B1149 aSMA_gH2AX 60x Scar 4 arrows	B1149	2
																						2020_10_09 Slide198 B1149 aSMA_gH2AX 60x Scar 4 arrows	B1149	3
																						2020_10_09 Slide198 B1149 aSMA_gH2AX 60x Scar 4 arrows	B1149	2
																						2020_10_09 Slide198 B1149 aSMA_gH2AX 60x Scar 4 arrows	B1149	1
																						2020_10_09 Slide198 B1149 aSMA_gH2AX 60x Scar 4 arrows	B1149	2
																						2020_10_09 Slide198 B1149 aSMA_gH2AX 60x Scar 4 arrows	B1149	1
																						2020_10_09 Slide198 B1149 aSMA_gH2AX 60x Scar 5 arrows	B1149	4
																						2020_10_09 Slide198 B1149 aSMA_gH2AX 60x Scar 5 arrows	B1149	1
																						2020_10_09 Slide198 B1149 aSMA_gH2AX 60x Scar 5 arrows	B1149	1
																						2020_10_09 Slide198 B1149 aSMA_gH2AX 60x Scar 5 arrows	B1149	2
																						2020_10_09 Slide198 B1149 aSMA_gH2AX 60x Scar 5 arrows	B1149	5	4
																						2020_10_09 Slide198 B1149 aSMA_gH2AX 60x Scar 5 arrows	B1149	1	2
																						2020_10_09 Slide198 B1149 aSMA_gH2AX 60x Scar 5 arrows	B1149	2
																						2020_10_09 Slide198 B1149 aSMA_gH2AX 60x Scar 5 arrows	B1149	1
																						2020_10_09 Slide199 S1165 aSMA_gH2AX 60x Scar 1 arrows	S1165	4
																						2020_10_09 Slide199 S1165 aSMA_gH2AX 60x Scar 1 arrows	S1165	2
																						2020_10_09 Slide199 S1165 aSMA_gH2AX 60x Scar 1 arrows	S1165	1
																						2020_10_09 Slide199 S1165 aSMA_gH2AX 60x Scar 1 arrows	S1165	1
																						2020_10_09 Slide199 S1165 aSMA_gH2AX 60x Scar 1 arrows	S1165	2
																						2020_10_09 Slide199 S1165 aSMA_gH2AX 60x Scar 2 arrows	S1165	4
																						2020_10_09 Slide199 S1165 aSMA_gH2AX 60x Scar 2 arrows	S1165	2
																						2020_10_09 Slide199 S1165 aSMA_gH2AX 60x Scar 2 arrows	S1165	5
																						2020_10_09 Slide199 S1165 aSMA_gH2AX 60x Scar 2 arrows	S1165	4
																						2020_10_09 Slide199 S1165 aSMA_gH2AX 60x Scar 2 arrows	S1165	6
																						2020_10_09 Slide199 S1165 aSMA_gH2AX 60x Scar 2 arrows	S1165	2
																						2020_10_09 Slide199 S1165 aSMA_gH2AX 60x Scar 2 arrows	S1165	3
																						2020_10_09 Slide199 S1165 aSMA_gH2AX 60x Scar 2 arrows	S1165	3
																						2020_10_09 Slide199 S1165 aSMA_gH2AX 60x Scar 2 arrows	S1165	1
																						2020_10_09 Slide199 S1165 aSMA_gH2AX 60x Scar 2 arrows	S1165	1
																						2020_10_09 Slide199 S1165 aSMA_gH2AX 60x Scar 2 arrows	S1165	1
																						2020_10_09 Slide199 S1165 aSMA_gH2AX 60x Scar 3 arrows	S1165	2
																						2020_10_09 Slide199 S1165 aSMA_gH2AX 60x Scar 3 arrows	S1165	3
																						2020_10_09 Slide199 S1165 aSMA_gH2AX 60x Scar 3 arrows	S1165	1
																						2020_10_09 Slide199 S1165 aSMA_gH2AX 60x Scar 3 arrows	S1165	1
																						2020_10_09 Slide199 S1165 aSMA_gH2AX 60x Scar 4 arrows	S1165	5
																						2020_10_09 Slide199 S1165 aSMA_gH2AX 60x Scar 4 arrows	S1165	4	1
																						2020_10_09 Slide199 S1165 aSMA_gH2AX 60x Scar 4 arrows	S1165	1
																						2020_10_09 Slide199 S1165 aSMA_gH2AX 60x Scar 4 arrows	S1165	1
																						2020_10_09 Slide199 S1165 aSMA_gH2AX 60x Scar 4 arrows	S1165	4
																						2020_10_09 Slide199 S1165 aSMA_gH2AX 60x Scar 4 arrows	S1165	4
																						2020_10_09 Slide199 S1165 aSMA_gH2AX 60x Scar 4 arrows	S1165	1
																						2020_10_09 Slide199 S1165 aSMA_gH2AX 60x Scar 4 arrows	S1165	3
																						2020_10_09 Slide199 S1165 aSMA_gH2AX 60x Scar 4 arrows	S1165	1	1
																						2020_10_09 Slide199 S1165 aSMA_gH2AX 60x Scar 4 arrows	S1165	1
																						2020_10_09 Slide199 S1165 aSMA_gH2AX 60x Scar 4 arrows	S1165	4	1
																						2020_10_09 Slide199 S1165 aSMA_gH2AX 60x Scar 5 arrow	S1165	2
																						2020_10_09 Slide199 S1165 aSMA_gH2AX 60x Scar 5 arrow	S1165	2
																						2020_10_09 Slide199 S1165 aSMA_gH2AX 60x Scar 5 arrow	S1165	1
																						2020_10_09 Slide199 S1165 aSMA_gH2AX 60x Scar 5 arrow	S1165	2
																						2020_10_09 Slide199 S1165 aSMA_gH2AX 60x Scar 5 arrow	S1165	3
																						2020_10_09 Slide199 S1165 aSMA_gH2AX 60x Scar 5 arrow	S1165	1
																						2020_10_09 Slide199 S1165 aSMA_gH2AX 60x Scar 5 arrow	S1165	1	4
																						2020_10_09 Slide199 S1165 aSMA_gH2AX 60x Scar 5 arrow	S1165	1	1
																						2020_10_09 Slide199 S1165 aSMA_gH2AX 60x Scar 5 arrow	S1165	2
																						2020_10_09 Slide201 91442 aSMA_gH2AX 60x Scar 1 arrows	91442	2
																						2020_10_09 Slide201 91442 aSMA_gH2AX 60x Scar 1 arrows	91442	1
																						2020_10_09 Slide201 91442 aSMA_gH2AX 60x Scar 1 arrows	91442	2
																						2020_10_09 Slide201 91442 aSMA_gH2AX 60x Scar 1 arrows	91442	1	1
																						2020_10_09 Slide201 91442 aSMA_gH2AX 60x Scar 1 arrows	91442	2	1
																						2020_10_09 Slide201 91442 aSMA_gH2AX 60x Scar 1 arrows	91442		1
																						2020_10_09 Slide201 91442 aSMA_gH2AX 60x Scar 1 arrows	91442	1	1
																						2020_10_09 Slide201 91442 aSMA_gH2AX 60x Scar 2 arrows	91442	1
																						2020_10_09 Slide201 91442 aSMA_gH2AX 60x Scar 2 arrows	91442	3
																						2020_10_09 Slide201 91442 aSMA_gH2AX 60x Scar 3 arrows	91442	1
																						2020_10_09 Slide201 91442 aSMA_gH2AX 60x Scar 3 arrows	91442	1
																						2020_10_09 Slide201 91442 aSMA_gH2AX 60x Scar 3 arrows	91442	1
																						2020_10_09 Slide201 91442 aSMA_gH2AX 60x Scar 3 arrows	91442	1
																						2020_10_09 Slide201 91442 aSMA_gH2AX 60x Scar 3 arrows	91442	2
																						2020_10_09 Slide201 91442 aSMA_gH2AX 60x Scar 3 arrows	91442	1
																						2020_10_09 Slide201 91442 aSMA_gH2AX 60x Scar 3 arrows	91442	3
																						2020_10_09 Slide201 91442 aSMA_gH2AX 60x Scar 4 arrows	91442	3
																						2020_10_09 Slide201 91442 aSMA_gH2AX 60x Scar 4 arrows	91442	1
																						2020_10_09 Slide201 91442 aSMA_gH2AX 60x Scar 4 arrows	91442	1
																						2020_10_09 Slide201 91442 aSMA_gH2AX 60x Scar 4 arrows	91442	2
																						2020_10_09 Slide201 91442 aSMA_gH2AX 60x Scar 4 arrows	91442	1
																						2020_10_09 Slide201 91442 aSMA_gH2AX 60x Scar 5 arrows	91442	1
																						2020_10_09 Slide201 91442 aSMA_gH2AX 60x Scar 5 arrows	91442	1
																						2020_10_09 Slide201 91442 aSMA_gH2AX 60x Scar 5 arrows	91442	2
																						2020_10_09 Slide202 X203 aSMA_gH2AX 60x Scar 1 arrows	X203	1
																						2020_10_09 Slide202 X203 aSMA_gH2AX 60x Scar 1 arrows	X203	1
																						2020_10_09 Slide202 X203 aSMA_gH2AX 60x Scar 1 arrows	X203	1
																						2020_10_09 Slide202 X203 aSMA_gH2AX 60x Scar 1 arrows	X203	1
																						2020_10_09 Slide202 X203 aSMA_gH2AX 60x Scar 1 arrows	X203	1
																						2020_10_09 Slide202 X203 aSMA_gH2AX 60x Scar 1 arrows	X203	1
																						2020_10_09 Slide202 X203 aSMA_gH2AX 60x Scar 1 arrows	X203	1
																						2020_10_09 Slide202 X203 aSMA_gH2AX 60x Scar 2 arrows	X203	1
																						2020_10_09 Slide202 X203 aSMA_gH2AX 60x Scar 2 arrows	X203	1
																						2020_10_09 Slide202 X203 aSMA_gH2AX 60x Scar 2 arrows	X203	1
																						2020_10_09 Slide202 X203 aSMA_gH2AX 60x Scar 2 arrows	X203	2
																						2020_10_09 Slide202 X203 aSMA_gH2AX 60x Scar 2 arrows	X203	4
																						2020_10_09 Slide202 X203 aSMA_gH2AX 60x Scar 2 arrows	X203	1	2
																						2020_10_09 Slide202 X203 aSMA_gH2AX 60x Scar 2 arrows	X203		1
																						2020_10_09 Slide202 X203 aSMA_gH2AX 60x Scar 2 arrows	X203		1
																						2020_10_09 Slide202 X203 aSMA_gH2AX 60x Scar 3 arrows	X203	2
																						2020_10_09 Slide202 X203 aSMA_gH2AX 60x Scar 3 arrows	X203	1	1
																						2020_10_09 Slide202 X203 aSMA_gH2AX 60x Scar 3 arrows	X203	1
																						2020_10_09 Slide202 X203 aSMA_gH2AX 60x Scar 3 arrows	X203	1
																						2020_10_09 Slide202 X203 aSMA_gH2AX 60x Scar 4 arrows	X203	3
																						2020_10_09 Slide202 X203 aSMA_gH2AX 60x Scar 5 arrows	X203	2
																						2020_10_09 Slide202 X203 aSMA_gH2AX 60x Scar 5 arrows	X203	1
																						2020_10_13 Slide188 D212 aSMA_gH2AX 60x Scar 1 - Deconvolved 20 iterations, TypeBlind arrows	D212		4
																						2020_10_13 Slide188 D212 aSMA_gH2AX 60x Scar 1 - Deconvolved 20 iterations, TypeBlind arrows	D212		1
																						2020_10_13 Slide188 D212 aSMA_gH2AX 60x Scar 1 - Deconvolved 20 iterations, TypeBlind arrows	D212		2
																						2020_10_13 Slide188 D212 aSMA_gH2AX 60x Scar 1 - Deconvolved 20 iterations, TypeBlind arrows	D212		3
																						2020_10_13 Slide188 D212 aSMA_gH2AX 60x Scar 1 - Deconvolved 20 iterations, TypeBlind arrows	D212		2
																						2020_10_13 Slide188 D212 aSMA_gH2AX 60x Scar 1 - Deconvolved 20 iterations, TypeBlind arrows	D212		1
																						2020_10_13 Slide188 D212 aSMA_gH2AX 60x Scar 1 - Deconvolved 20 iterations, TypeBlind arrows	D212		1
																						2020_10_13 Slide188 D212 aSMA_gH2AX 60x Scar 1 - Deconvolved 20 iterations, TypeBlind arrows	D212		1
																						2020_10_13 Slide188 D212 aSMA_gH2AX 60x Scar 1 - Deconvolved 20 iterations, TypeBlind arrows	D212		1
																						2020_10_13 Slide188 D212 aSMA_gH2AX 60x Scar 1 - Deconvolved 20 iterations, TypeBlind arrows	D212		2
																						2020_10_13 Slide188 D212 aSMA_gH2AX 60x Scar 1 - Deconvolved 20 iterations, TypeBlind arrows	D212		1
																						2020_10_13 Slide188 D212 aSMA_gH2AX 60x Scar 1 - Deconvolved 20 iterations, TypeBlind arrows	D212		2
																						2020_10_13 Slide188 D212 aSMA_gH2AX 60x Scar 1 - Deconvolved 20 iterations, TypeBlind arrows	D212		1
																						2020_10_13 Slide188 D212 aSMA_gH2AX 60x Scar 1 - Deconvolved 20 iterations, TypeBlind arrows	D212		2
																						2020_10_13 Slide188 D212 aSMA_gH2AX 60x Scar 1 - Deconvolved 20 iterations, TypeBlind arrows	D212		1
																						2020_10_13 Slide188 D212 aSMA_gH2AX 60x Scar 1 - Deconvolved 20 iterations, TypeBlind arrows	D212		1
																						2020_10_13 Slide188 D212 aSMA_gH2AX 60x Scar 1 - Deconvolved 20 iterations, TypeBlind arrows	D212		3
																						2020_10_13 Slide188 D212 aSMA_gH2AX 60x Scar 1 - Deconvolved 20 iterations, TypeBlind arrows	D212		3
																						2020_10_13 Slide188 D212 aSMA_gH2AX 60x Scar 1 - Deconvolved 20 iterations, TypeBlind arrows	D212		1
																						2020_10_13 Slide188 D212 aSMA_gH2AX 60x Scar 1 - Deconvolved 20 iterations, TypeBlind arrows	D212		1
																						2020_10_13 Slide188 D212 aSMA_gH2AX 60x Scar 1 - Deconvolved 20 iterations, TypeBlind arrows	D212		1
																						2020_10_13 Slide188 D212 aSMA_gH2AX 60x Scar 2 - Deconvolved 20 iterations, TypeBlind arrows	D212		4
																						2020_10_13 Slide188 D212 aSMA_gH2AX 60x Scar 2 - Deconvolved 20 iterations, TypeBlind arrows	D212		2
																						2020_10_13 Slide188 D212 aSMA_gH2AX 60x Scar 2 - Deconvolved 20 iterations, TypeBlind arrows	D212		2
																						2020_10_13 Slide188 D212 aSMA_gH2AX 60x Scar 2 - Deconvolved 20 iterations, TypeBlind arrows	D212		2
																						2020_10_13 Slide188 D212 aSMA_gH2AX 60x Scar 2 - Deconvolved 20 iterations, TypeBlind arrows	D212		1
																						2020_10_13 Slide188 D212 aSMA_gH2AX 60x Scar 2 - Deconvolved 20 iterations, TypeBlind arrows	D212		2
																						2020_10_13 Slide188 D212 aSMA_gH2AX 60x Scar 2 - Deconvolved 20 iterations, TypeBlind arrows	D212		1
																						2020_10_13 Slide188 D212 aSMA_gH2AX 60x Scar 2 - Deconvolved 20 iterations, TypeBlind arrows	D212		1
																						2020_10_13 Slide188 D212 aSMA_gH2AX 60x Scar 2 - Deconvolved 20 iterations, TypeBlind arrows	D212		2
																						2020_10_13 Slide188 D212 aSMA_gH2AX 60x Scar 2 - Deconvolved 20 iterations, TypeBlind arrows	D212		1
																						2020_10_13 Slide188 D212 aSMA_gH2AX 60x Scar 2 - Deconvolved 20 iterations, TypeBlind arrows	D212		4
																						2020_10_13 Slide188 D212 aSMA_gH2AX 60x Scar 2 - Deconvolved 20 iterations, TypeBlind arrows	D212		1
																						2020_10_13 Slide188 D212 aSMA_gH2AX 60x Scar 2 - Deconvolved 20 iterations, TypeBlind arrows	D212		1
																						2020_10_13 Slide188 D212 aSMA_gH2AX 60x Scar 2 - Deconvolved 20 iterations, TypeBlind arrows	D212		1
																						2020_10_13 Slide188 D212 aSMA_gH2AX 60x Scar 2 - Deconvolved 20 iterations, TypeBlind arrows	D212		2
																						2020_10_13 Slide188 D212 aSMA_gH2AX 60x Scar 2 - Deconvolved 20 iterations, TypeBlind arrows	D212		2
																						2020_10_13 Slide188 D212 aSMA_gH2AX 60x Scar 2 - Deconvolved 20 iterations, TypeBlind arrows	D212		6
																						2020_10_13 Slide188 D212 aSMA_gH2AX 60x Scar 2 - Deconvolved 20 iterations, TypeBlind arrows	D212	2	1
																						2020_10_13 Slide188 D212 aSMA_gH2AX 60x Scar 2 - Deconvolved 20 iterations, TypeBlind arrows	D212	1
																						2020_10_13 Slide188 D212 aSMA_gH2AX 60x Scar 2 - Deconvolved 20 iterations, TypeBlind arrows	D212	1	7
																						2020_10_13 Slide188 D212 aSMA_gH2AX 60x Scar 2 - Deconvolved 20 iterations, TypeBlind arrows	D212	2	7
																						2020_10_13 Slide188 D212 aSMA_gH2AX 60x Scar 2 - Deconvolved 20 iterations, TypeBlind arrows	D212	2	3
																						2020_10_13 Slide188 D212 aSMA_gH2AX 60x Scar 2 - Deconvolved 20 iterations, TypeBlind arrows	D212	2	6
																						2020_10_13 Slide188 D212 aSMA_gH2AX 60x Scar 2 - Deconvolved 20 iterations, TypeBlind arrows	D212	1	4
																						2020_10_13 Slide188 D212 aSMA_gH2AX 60x Scar 2 - Deconvolved 20 iterations, TypeBlind arrows	D212	1	1
																						2020_10_13 Slide188 D212 aSMA_gH2AX 60x Scar 2 - Deconvolved 20 iterations, TypeBlind arrows	D212		1
																						2020_10_13 Slide188 D212 aSMA_gH2AX 60x Scar 3 - Deconvolved 20 iterations, TypeBlind arrow	D212	1	5
																						2020_10_13 Slide188 D212 aSMA_gH2AX 60x Scar 4 - Deconvolved 20 iterations, TypeBlind arrows	D212	1	2
																						2020_10_13 Slide188 D212 aSMA_gH2AX 60x Scar 4 - Deconvolved 20 iterations, TypeBlind arrows	D212		3
																						2020_10_13 Slide188 D212 aSMA_gH2AX 60x Scar 4 - Deconvolved 20 iterations, TypeBlind arrows	D212		1
																						2020_10_13 Slide188 D212 aSMA_gH2AX 60x Scar 4 - Deconvolved 20 iterations, TypeBlind arrows	D212		1
																						2020_10_13 Slide188 D212 aSMA_gH2AX 60x Scar 4 - Deconvolved 20 iterations, TypeBlind arrows	D212		5
																						2020_10_13 Slide188 D212 aSMA_gH2AX 60x Scar 4 - Deconvolved 20 iterations, TypeBlind arrows	D212		4
																						2020_10_13 Slide188 D212 aSMA_gH2AX 60x Scar 4 - Deconvolved 20 iterations, TypeBlind arrows	D212		1
																						2020_10_13 Slide188 D212 aSMA_gH2AX 60x Scar 4 - Deconvolved 20 iterations, TypeBlind arrows	D212		4
																						2020_10_13 Slide188 D212 aSMA_gH2AX 60x Scar 4 - Deconvolved 20 iterations, TypeBlind arrows	D212		1
																						2020_10_13 Slide188 D212 aSMA_gH2AX 60x Scar 4 - Deconvolved 20 iterations, TypeBlind arrows	D212		2
																						2020_10_13 Slide188 D212 aSMA_gH2AX 60x Scar 4 - Deconvolved 20 iterations, TypeBlind arrows	D212		2
																						2020_10_13 Slide188 D212 aSMA_gH2AX 60x Scar 4 - Deconvolved 20 iterations, TypeBlind arrows	D212		2
																						2020_10_13 Slide188 D212 aSMA_gH2AX 60x Scar 4 - Deconvolved 20 iterations, TypeBlind arrows	D212		1
																						2020_10_13 Slide188 D212 aSMA_gH2AX 60x Scar 4 - Deconvolved 20 iterations, TypeBlind arrows	D212		1
																						2020_10_13 Slide188 D212 aSMA_gH2AX 60x Scar 4 - Deconvolved 20 iterations, TypeBlind arrows	D212		1
																						2020_10_13 Slide188 D212 aSMA_gH2AX 60x Scar 4 - Deconvolved 20 iterations, TypeBlind arrows	D212		1
																						2020_10_13 Slide188 D212 aSMA_gH2AX 60x Scar 4 - Deconvolved 20 iterations, TypeBlind arrows	D212		1
																						2020_10_13 Slide188 D212 aSMA_gH2AX 60x Scar 4 - Deconvolved 20 iterations, TypeBlind arrows	D212		1
																						2020_10_13 Slide188 D212 aSMA_gH2AX 60x Scar 4 - Deconvolved 20 iterations, TypeBlind arrows	D212		2
																						2020_10_13 Slide188 D212 aSMA_gH2AX 60x Scar 4 - Deconvolved 20 iterations, TypeBlind arrows	D212		2
																						2020_10_13 Slide188 D212 aSMA_gH2AX 60x Scar 4 - Deconvolved 20 iterations, TypeBlind arrows	D212		2
																						2020_10_13 Slide188 D212 aSMA_gH2AX 60x Scar 5 - Deconvolved 20 iterations, TypeBlind arrows	D212		2
																						2020_10_13 Slide188 D212 aSMA_gH2AX 60x Scar 5 - Deconvolved 20 iterations, TypeBlind arrows	D212		1
																						2020_10_13 Slide188 D212 aSMA_gH2AX 60x Scar 5 - Deconvolved 20 iterations, TypeBlind arrows	D212		4
																						2020_10_13 Slide188 D212 aSMA_gH2AX 60x Scar 5 - Deconvolved 20 iterations, TypeBlind arrows	D212		1
																						2020_10_13 Slide188 D212 aSMA_gH2AX 60x Scar 5 - Deconvolved 20 iterations, TypeBlind arrows	D212		1
																						2020_10_13 Slide188 D212 aSMA_gH2AX 60x Scar 5 - Deconvolved 20 iterations, TypeBlind arrows	D212		1
																						2020_10_13 Slide188 D212 aSMA_gH2AX 60x Scar 5 - Deconvolved 20 iterations, TypeBlind arrows	D212		1
																						2020_10_13 Slide188 D212 aSMA_gH2AX 60x Scar 5 - Deconvolved 20 iterations, TypeBlind arrows	D212		1
																						2020_10_13 Slide188 D212 aSMA_gH2AX 60x Scar 5 - Deconvolved 20 iterations, TypeBlind arrows	D212		4
																						2020_10_13 Slide188 D212 aSMA_gH2AX 60x Scar 5 - Deconvolved 20 iterations, TypeBlind arrows	D212		1
																						2020_10_13 Slide188 D212 aSMA_gH2AX 60x Scar 5 - Deconvolved 20 iterations, TypeBlind arrows	D212		1
																						2020_10_13 Slide188 D212 aSMA_gH2AX 60x Scar 5 - Deconvolved 20 iterations, TypeBlind arrows	D212		4
																						2020_10_13 Slide188 D212 aSMA_gH2AX 60x Scar 5 - Deconvolved 20 iterations, TypeBlind arrows	D212		1
																						2020_10_13 Slide188 D212 aSMA_gH2AX 60x Scar 5 - Deconvolved 20 iterations, TypeBlind arrows	D212		1
																						2020_10_13 Slide189 D216 aSMA_gH2AX 60x Scar 1 - Deconvolved 20 iterations, TypeBlind arrow	D216	1
																						2020_10_13 Slide189 D216 aSMA_gH2AX 60x Scar 1 - Deconvolved 20 iterations, TypeBlind arrow	D216	2
																						2020_10_13 Slide189 D216 aSMA_gH2AX 60x Scar 1 - Deconvolved 20 iterations, TypeBlind arrow	D216	1
																						2020_10_13 Slide189 D216 aSMA_gH2AX 60x Scar 3 - Deconvolved 20 iterations, TypeBlind arrows	D216	1
																						2020_10_13 Slide189 D216 aSMA_gH2AX 60x Scar 3 - Deconvolved 20 iterations, TypeBlind arrows	D216	4
																						2020_10_13 Slide189 D216 aSMA_gH2AX 60x Scar 3 - Deconvolved 20 iterations, TypeBlind arrows	D216	2
																						2020_10_13 Slide189 D216 aSMA_gH2AX 60x Scar 4 - Deconvolved 20 iterations, TypeBlind arrows	D216		1
																						2020_10_13 Slide189 D216 aSMA_gH2AX 60x Scar 5 - Deconvolved 20 iterations, TypeBlind arrows	D216		5
																						2020_10_13 Slide189 D216 aSMA_gH2AX 60x Scar 5 - Deconvolved 20 iterations, TypeBlind arrows	D216		2
																						2020_10_13 Slide189 D216 aSMA_gH2AX 60x Scar 5 - Deconvolved 20 iterations, TypeBlind arrows	D216		3
																						2020_10_13 Slide190 C567 aSMA_gH2AX 60x Scar 1 - Deconvolved 20 iterations, TypeBlind arrows	C567		1
																						2020_10_13 Slide190 C567 aSMA_gH2AX 60x Scar 1 - Deconvolved 20 iterations, TypeBlind arrows	C567		4
																						2020_10_13 Slide190 C567 aSMA_gH2AX 60x Scar 1 - Deconvolved 20 iterations, TypeBlind arrows	C567		2
																						2020_10_13 Slide190 C567 aSMA_gH2AX 60x Scar 2 - Deconvolved 20 iterations, TypeBlind arrows	C567		3
																						2020_10_13 Slide190 C567 aSMA_gH2AX 60x Scar 2 - Deconvolved 20 iterations, TypeBlind arrows	C567		2
																						2020_10_13 Slide190 C567 aSMA_gH2AX 60x Scar 2 - Deconvolved 20 iterations, TypeBlind arrows	C567		1
																						2020_10_13 Slide190 C567 aSMA_gH2AX 60x Scar 2 - Deconvolved 20 iterations, TypeBlind arrows	C567		1
																						2020_10_13 Slide190 C567 aSMA_gH2AX 60x Scar 2 - Deconvolved 20 iterations, TypeBlind arrows	C567		1
																						2020_10_13 Slide190 C567 aSMA_gH2AX 60x Scar 3 - Deconvolved 20 iterations, TypeBlind arrows	C567		1
																						2020_10_13 Slide190 C567 aSMA_gH2AX 60x Scar 4 - Deconvolved 20 iterations, TypeBlind arrows	C567		1
																						2020_10_13 Slide190 C567 aSMA_gH2AX 60x Scar 4 - Deconvolved 20 iterations, TypeBlind arrows	C567		1
																						2020_10_13 Slide190 C567 aSMA_gH2AX 60x Scar 4 - Deconvolved 20 iterations, TypeBlind arrows	C567		5
																						2020_10_13 Slide190 C567 aSMA_gH2AX 60x Scar 4 - Deconvolved 20 iterations, TypeBlind arrows	C567		2
																						2020_10_13 Slide190 C567 aSMA_gH2AX 60x Scar 4 - Deconvolved 20 iterations, TypeBlind arrows	C567		1
																						2020_10_13 Slide190 C567 aSMA_gH2AX 60x Scar 4 - Deconvolved 20 iterations, TypeBlind arrows	C567		2
																						2020_10_13 Slide190 C567 aSMA_gH2AX 60x Scar 4 - Deconvolved 20 iterations, TypeBlind arrows	C567		2
																						2020_10_13 Slide190 C567 aSMA_gH2AX 60x Scar 4 - Deconvolved 20 iterations, TypeBlind arrows	C567		2
																						2020_10_13 Slide190 C567 aSMA_gH2AX 60x Scar 5 - Deconvolved 20 iterations, TypeBlind arrows	C567		5
																						2020_10_13 Slide190 C567 aSMA_gH2AX 60x Scar 5 - Deconvolved 20 iterations, TypeBlind arrows	C567		1
																						2020_10_13 Slide200 F894 aSMA_gH2AX 60x Scar 1 - Deconvolved 20 iterations, TypeBlind arrows	F894	4
																						2020_10_13 Slide200 F894 aSMA_gH2AX 60x Scar 1 - Deconvolved 20 iterations, TypeBlind arrows	F894	3
																						2020_10_13 Slide200 F894 aSMA_gH2AX 60x Scar 1 - Deconvolved 20 iterations, TypeBlind arrows	F894	2
																						2020_10_13 Slide200 F894 aSMA_gH2AX 60x Scar 1 - Deconvolved 20 iterations, TypeBlind arrows	F894	4
																						2020_10_13 Slide200 F894 aSMA_gH2AX 60x Scar 1 - Deconvolved 20 iterations, TypeBlind arrows	F894	1
																						2020_10_13 Slide200 F894 aSMA_gH2AX 60x Scar 1 - Deconvolved 20 iterations, TypeBlind arrows	F894	2
																						2020_10_13 Slide200 F894 aSMA_gH2AX 60x Scar 1 - Deconvolved 20 iterations, TypeBlind arrows	F894	2
																						2020_10_13 Slide200 F894 aSMA_gH2AX 60x Scar 1 - Deconvolved 20 iterations, TypeBlind arrows	F894	1
																						2020_10_13 Slide200 F894 aSMA_gH2AX 60x Scar 1 - Deconvolved 20 iterations, TypeBlind arrows	F894	1
																						2020_10_13 Slide200 F894 aSMA_gH2AX 60x Scar 1 - Deconvolved 20 iterations, TypeBlind arrows	F894	4
																						2020_10_13 Slide200 F894 aSMA_gH2AX 60x Scar 1 - Deconvolved 20 iterations, TypeBlind arrows	F894	4
																						2020_10_13 Slide200 F894 aSMA_gH2AX 60x Scar 1 - Deconvolved 20 iterations, TypeBlind arrows	F894	2
																						2020_10_13 Slide200 F894 aSMA_gH2AX 60x Scar 1 - Deconvolved 20 iterations, TypeBlind arrows	F894	2
																						2020_10_13 Slide200 F894 aSMA_gH2AX 60x Scar 1 - Deconvolved 20 iterations, TypeBlind arrows	F894	3
																						2020_10_13 Slide200 F894 aSMA_gH2AX 60x Scar 1 - Deconvolved 20 iterations, TypeBlind arrows	F894	4
																						2020_10_13 Slide200 F894 aSMA_gH2AX 60x Scar 1 - Deconvolved 20 iterations, TypeBlind arrows	F894	3
																						2020_10_13 Slide200 F894 aSMA_gH2AX 60x Scar 1 - Deconvolved 20 iterations, TypeBlind arrows	F894	1
																						2020_10_13 Slide200 F894 aSMA_gH2AX 60x Scar 1 - Deconvolved 20 iterations, TypeBlind arrows	F894	4
																						2020_10_13 Slide200 F894 aSMA_gH2AX 60x Scar 1 - Deconvolved 20 iterations, TypeBlind arrows	F894	1
																						2020_10_13 Slide200 F894 aSMA_gH2AX 60x Scar 1 - Deconvolved 20 iterations, TypeBlind arrows	F894	1
																						2020_10_13 Slide200 F894 aSMA_gH2AX 60x Scar 1 - Deconvolved 20 iterations, TypeBlind arrows	F894	2
																						2020_10_13 Slide200 F894 aSMA_gH2AX 60x Scar 1 - Deconvolved 20 iterations, TypeBlind arrows	F894	3
																						2020_10_13 Slide200 F894 aSMA_gH2AX 60x Scar 1 - Deconvolved 20 iterations, TypeBlind arrows	F894	2
																						2020_10_13 Slide200 F894 aSMA_gH2AX 60x Scar 1 - Deconvolved 20 iterations, TypeBlind arrows	F894		1
																						2020_10_13 Slide200 F894 aSMA_gH2AX 60x Scar 1 - Deconvolved 20 iterations, TypeBlind arrows	F894		3
																						2020_10_13 Slide200 F894 aSMA_gH2AX 60x Scar 1 - Deconvolved 20 iterations, TypeBlind arrows	F894		4
																						2020_10_13 Slide200 F894 aSMA_gH2AX 60x Scar 1 - Deconvolved 20 iterations, TypeBlind arrows	F894	2
																						2020_10_13 Slide200 F894 aSMA_gH2AX 60x Scar 1 - Deconvolved 20 iterations, TypeBlind arrows	F894	1
																						2020_10_13 Slide200 F894 aSMA_gH2AX 60x Scar 1 - Deconvolved 20 iterations, TypeBlind arrows	F894	3
																						2020_10_13 Slide200 F894 aSMA_gH2AX 60x Scar 2 - Deconvolved 20 iterations, TypeBlind arrows	F894	2
																						2020_10_13 Slide200 F894 aSMA_gH2AX 60x Scar 2 - Deconvolved 20 iterations, TypeBlind arrows	F894	1
																						2020_10_13 Slide200 F894 aSMA_gH2AX 60x Scar 2 - Deconvolved 20 iterations, TypeBlind arrows	F894	1	3
																						2020_10_13 Slide200 F894 aSMA_gH2AX 60x Scar 2 - Deconvolved 20 iterations, TypeBlind arrows	F894	2
																						2020_10_13 Slide200 F894 aSMA_gH2AX 60x Scar 2 - Deconvolved 20 iterations, TypeBlind arrows	F894	3	5
																						2020_10_13 Slide200 F894 aSMA_gH2AX 60x Scar 2 - Deconvolved 20 iterations, TypeBlind arrows	F894	1
																						2020_10_13 Slide200 F894 aSMA_gH2AX 60x Scar 2 - Deconvolved 20 iterations, TypeBlind arrows	F894	1
																						2020_10_13 Slide200 F894 aSMA_gH2AX 60x Scar 2 - Deconvolved 20 iterations, TypeBlind arrows	F894	1
																						2020_10_13 Slide200 F894 aSMA_gH2AX 60x Scar 2 - Deconvolved 20 iterations, TypeBlind arrows	F894	3
																						2020_10_13 Slide200 F894 aSMA_gH2AX 60x Scar 2 - Deconvolved 20 iterations, TypeBlind arrows	F894	4
																						2020_10_13 Slide200 F894 aSMA_gH2AX 60x Scar 2 - Deconvolved 20 iterations, TypeBlind arrows	F894	1
																						2020_10_13 Slide200 F894 aSMA_gH2AX 60x Scar 2 - Deconvolved 20 iterations, TypeBlind arrows	F894	3
																						2020_10_13 Slide200 F894 aSMA_gH2AX 60x Scar 2 - Deconvolved 20 iterations, TypeBlind arrows	F894	2
																						2020_10_13 Slide200 F894 aSMA_gH2AX 60x Scar 2 - Deconvolved 20 iterations, TypeBlind arrows	F894	1
																						2020_10_13 Slide200 F894 aSMA_gH2AX 60x Scar 3 - Deconvolved 20 iterations, TypeBlind arrows	F894	2
																						2020_10_13 Slide200 F894 aSMA_gH2AX 60x Scar 3 - Deconvolved 20 iterations, TypeBlind arrows	F894	2
																						2020_10_13 Slide200 F894 aSMA_gH2AX 60x Scar 3 - Deconvolved 20 iterations, TypeBlind arrows	F894	1
																						2020_10_13 Slide200 F894 aSMA_gH2AX 60x Scar 3 - Deconvolved 20 iterations, TypeBlind arrows	F894	2
																						2020_10_13 Slide200 F894 aSMA_gH2AX 60x Scar 3 - Deconvolved 20 iterations, TypeBlind arrows	F894	4	3
																						2020_10_13 Slide200 F894 aSMA_gH2AX 60x Scar 3 - Deconvolved 20 iterations, TypeBlind arrows	F894	1
																						2020_10_13 Slide200 F894 aSMA_gH2AX 60x Scar 3 - Deconvolved 20 iterations, TypeBlind arrows	F894	1
																						2020_10_13 Slide200 F894 aSMA_gH2AX 60x Scar 4 - Deconvolved 20 iterations, TypeBlind arrows	F894	3
																						2020_10_13 Slide200 F894 aSMA_gH2AX 60x Scar 4 - Deconvolved 20 iterations, TypeBlind arrows	F894	1
																						2020_10_13 Slide200 F894 aSMA_gH2AX 60x Scar 4 - Deconvolved 20 iterations, TypeBlind arrows	F894	3
																						2020_10_13 Slide200 F894 aSMA_gH2AX 60x Scar 4 - Deconvolved 20 iterations, TypeBlind arrows	F894	2
																						2020_10_13 Slide200 F894 aSMA_gH2AX 60x Scar 4 - Deconvolved 20 iterations, TypeBlind arrows	F894	3
																						2020_10_13 Slide200 F894 aSMA_gH2AX 60x Scar 4 - Deconvolved 20 iterations, TypeBlind arrows	F894	1
																						2020_10_13 Slide200 F894 aSMA_gH2AX 60x Scar 4 - Deconvolved 20 iterations, TypeBlind arrows	F894	3
																						2020_10_13 Slide200 F894 aSMA_gH2AX 60x Scar 4 - Deconvolved 20 iterations, TypeBlind arrows	F894	4
																						2020_10_13 Slide200 F894 aSMA_gH2AX 60x Scar 4 - Deconvolved 20 iterations, TypeBlind arrows	F894	2
																						2020_10_13 Slide200 F894 aSMA_gH2AX 60x Scar 4 - Deconvolved 20 iterations, TypeBlind arrows	F894	3
																						2020_10_13 Slide200 F894 aSMA_gH2AX 60x Scar 4 - Deconvolved 20 iterations, TypeBlind arrows	F894	1
																						2020_10_13 Slide200 F894 aSMA_gH2AX 60x Scar 4 - Deconvolved 20 iterations, TypeBlind arrows	F894	3
																						2020_10_13 Slide200 F894 aSMA_gH2AX 60x Scar 5 - Deconvolved 20 iterations, TypeBlind arrows	F894	2
																						2020_10_13 Slide200 F894 aSMA_gH2AX 60x Scar 5 - Deconvolved 20 iterations, TypeBlind arrows	F894	4
																						2020_10_13 Slide200 F894 aSMA_gH2AX 60x Scar 5 - Deconvolved 20 iterations, TypeBlind arrows	F894	3
																						2020_10_13 Slide200 F894 aSMA_gH2AX 60x Scar 5 - Deconvolved 20 iterations, TypeBlind arrows	F894	4
																						2020_10_13 Slide200 F894 aSMA_gH2AX 60x Scar 5 - Deconvolved 20 iterations, TypeBlind arrows	F894	5
																						2020_10_13 Slide200 F894 aSMA_gH2AX 60x Scar 5 - Deconvolved 20 iterations, TypeBlind arrows	F894	3
																						2020_10_13 Slide200 F894 aSMA_gH2AX 60x Scar 5 - Deconvolved 20 iterations, TypeBlind arrows	F894	2
																						2020_10_13 Slide200 F894 aSMA_gH2AX 60x Scar 5 - Deconvolved 20 iterations, TypeBlind arrows	F894	1
																						2020_10_13 Slide200 F894 aSMA_gH2AX 60x Scar 5 - Deconvolved 20 iterations, TypeBlind arrows	F894	1
																						2020_10_13 Slide200 F894 aSMA_gH2AX 60x Scar 5 - Deconvolved 20 iterations, TypeBlind arrows	F894	2
																						2020_10_13 Slide200 F894 aSMA_gH2AX 60x Scar 5 - Deconvolved 20 iterations, TypeBlind arrows	F894	1
																						2020_10_13 Slide200 F894 aSMA_gH2AX 60x Scar 5 - Deconvolved 20 iterations, TypeBlind arrows	F894	2
																						2020_10_13 Slide200 F894 aSMA_gH2AX 60x Scar 5 - Deconvolved 20 iterations, TypeBlind arrows	F894	2
																						2020_10_13 Slide200 F894 aSMA_gH2AX 60x Scar 5 - Deconvolved 20 iterations, TypeBlind arrows	F894	1
																						2020_10_13 Slide200 F894 aSMA_gH2AX 60x Scar 5 - Deconvolved 20 iterations, TypeBlind arrows	F894	1
																						2020_10_13 Slide200 F894 aSMA_gH2AX 60x Scar 5 - Deconvolved 20 iterations, TypeBlind arrows	F894	3
																						2020_10_13 Slide200 F894 aSMA_gH2AX 60x Scar 5 - Deconvolved 20 iterations, TypeBlind arrows	F894	3	3
																						2020_10_13 Slide200 F894 aSMA_gH2AX 60x Scar 5 - Deconvolved 20 iterations, TypeBlind arrows	F894	4	2
																						2020_10_13 Slide200 F894 aSMA_gH2AX 60x Scar 5 - Deconvolved 20 iterations, TypeBlind arrows	F894	2
																						2020_11_09 Slide203 X209 aSMA_gH2AX 60x Scar 1 arrows	X209	1
																						2020_11_09 Slide203 X209 aSMA_gH2AX 60x Scar 1 arrows	X209	1
																						2020_11_09 Slide203 X209 aSMA_gH2AX 60x Scar 1 arrows	X209	1
																						2020_11_09 Slide203 X209 aSMA_gH2AX 60x Scar 1 arrows	X209	2
																						2020_11_09 Slide203 X209 aSMA_gH2AX 60x Scar 1 arrows	X209	1
																						2020_11_09 Slide203 X209 aSMA_gH2AX 60x Scar 1 arrows	X209	2
																						2020_11_09 Slide203 X209 aSMA_gH2AX 60x Scar 2 arrows	X209	1
																						2020_11_09 Slide203 X209 aSMA_gH2AX 60x Scar 2 arrows	X209	2
																						2020_11_09 Slide203 X209 aSMA_gH2AX 60x Scar 2 arrows	X209	1
																						2020_11_09 Slide203 X209 aSMA_gH2AX 60x Scar 2 arrows	X209	1
																						2020_11_09 Slide203 X209 aSMA_gH2AX 60x Scar 2 arrows	X209	1
																						2020_11_09 Slide203 X209 aSMA_gH2AX 60x Scar 2 arrows	X209	1
																						2020_11_09 Slide203 X209 aSMA_gH2AX 60x Scar 2 arrows	X209	4
																						2020_11_09 Slide203 X209 aSMA_gH2AX 60x Scar 2 arrows	X209	2
																						2020_11_09 Slide203 X209 aSMA_gH2AX 60x Scar 2 arrows	X209	2
																						2020_11_09 Slide203 X209 aSMA_gH2AX 60x Scar 2 arrows	X209	1
																						2020_11_09 Slide203 X209 aSMA_gH2AX 60x Scar 2 arrows	X209	1
																						2020_11_09 Slide203 X209 aSMA_gH2AX 60x Scar 2 arrows	X209	1
																						2020_11_09 Slide203 X209 aSMA_gH2AX 60x Scar 3 arrows	X209	2
																						2020_11_09 Slide203 X209 aSMA_gH2AX 60x Scar 3 arrows	X209	7
																						2020_11_09 Slide203 X209 aSMA_gH2AX 60x Scar 3 arrows	X209	1
																						2020_11_09 Slide203 X209 aSMA_gH2AX 60x Scar 3 arrows	X209	1
																						2020_11_09 Slide203 X209 aSMA_gH2AX 60x Scar 3 arrows	X209	1
																						2020_11_09 Slide203 X209 aSMA_gH2AX 60x Scar 3 arrows	X209	1
																						2020_11_09 Slide203 X209 aSMA_gH2AX 60x Scar 3 arrows	X209	2
																						2020_11_09 Slide203 X209 aSMA_gH2AX 60x Scar 3 arrows	X209	1
																						2020_11_09 Slide203 X209 aSMA_gH2AX 60x Scar 4 arrows	X209	1
																						2020_11_09 Slide203 X209 aSMA_gH2AX 60x Scar 4 arrows	X209	1
																						2020_11_09 Slide203 X209 aSMA_gH2AX 60x Scar 4 arrows	X209	1
																						2020_11_09 Slide203 X209 aSMA_gH2AX 60x Scar 4 arrows	X209	2
																						2020_11_09 Slide203 X209 aSMA_gH2AX 60x Scar 4 arrows	X209	1
																						2020_11_09 Slide203 X209 aSMA_gH2AX 60x Scar 4 arrows	X209	1
																						2020_11_09 Slide203 X209 aSMA_gH2AX 60x Scar 4 arrows	X209	2
																						2020_11_09 Slide203 X209 aSMA_gH2AX 60x Scar 5 arrows	X209	4
																						2020_11_09 Slide203 X209 aSMA_gH2AX 60x Scar 5 arrows	X209	1
																						2020_11_09 Slide203 X209 aSMA_gH2AX 60x Scar 5 arrows	X209	2
																						2020_11_09 Slide203 X209 aSMA_gH2AX 60x Scar 5 arrows	X209	1
																						2020_11_09 Slide203 X209 aSMA_gH2AX 60x Scar 5 arrows	X209	3
																						2020_11_09 Slide203 X209 aSMA_gH2AX 60x Scar 5 arrows	X209	2
																						2020_11_09 Slide203 X209 aSMA_gH2AX 60x Scar 5 arrows	X209	2
																						2020_11_09 Slide203 X209 aSMA_gH2AX 60x Scar 5 arrows	X209	1
																						2020_11_09 Slide203 X209 aSMA_gH2AX 60x Scar 5 arrows	X209	1
																						2020_11_09 Slide203 X209 aSMA_gH2AX 60x Scar 5 arrows	X209	2
																						2020_11_09 Slide203 X209 aSMA_gH2AX 60x Scar 5 arrows	X209	1
																						2020_11_09 Slide203 X209 aSMA_gH2AX 60x Scar 5 arrows	X209	1
																						2021_02_16 X205 aSMA_gH2AX 60x Scar 1 arrows	X205	1
																						2021_02_16 X205 aSMA_gH2AX 60x Scar 1 arrows	X205	1
																						2021_02_16 X205 aSMA_gH2AX 60x Scar 1 arrows	X205	1
																						2021_02_16 X205 aSMA_gH2AX 60x Scar 2 arrows	X205	1
																						2021_02_16 X205 aSMA_gH2AX 60x Scar 2 arrows	X205	1
																						2021_02_16 X205 aSMA_gH2AX 60x Scar 2 arrows	X205	3
																						2021_02_16 X205 aSMA_gH2AX 60x Scar 3 arrows	X205	3
																						2021_02_16 X205 aSMA_gH2AX 60x Scar 3 arrows	X205	1
																						2021_02_16 X205 aSMA_gH2AX 60x Scar 4 arrows	X205
																						2021_02_16 X205 aSMA_gH2AX 60x Scar 5 arrows	X205	1	3
																						2021_02_16 X205 aSMA_gH2AX 60x Scar 5 arrows	X205	1
																						2021_02_16 R498 aSMA_gH2AX 60x Scar 1 arrows	R498	2
																						2021_02_16 R498 aSMA_gH2AX 60x Scar 1 arrows	R498	2
																						2021_02_16 R498 aSMA_gH2AX 60x Scar 1 arrows	R498	2
																						2021_02_16 R498 aSMA_gH2AX 60x Scar 1 arrows	R498	1
																						2021_02_16 R498 aSMA_gH2AX 60x Scar 1 arrows	R498	2
																						2021_02_16 R498 aSMA_gH2AX 60x Scar 1 arrows	R498	1
																						2021_02_16 R498 aSMA_gH2AX 60x Scar 1 arrows	R498	6
																						2021_02_16 R498 aSMA_gH2AX 60x Scar 1 arrows	R498	3
																						2021_02_16 R498 aSMA_gH2AX 60x Scar 1 arrows	R498	4
																						2021_02_16 R498 aSMA_gH2AX 60x Scar 2 arrows	R498	2
																						2021_02_16 R498 aSMA_gH2AX 60x Scar 2 arrows	R498	2
																						2021_02_16 R498 aSMA_gH2AX 60x Scar 2 arrows	R498	3
																						2021_02_16 R498 aSMA_gH2AX 60x Scar 2 arrows	R498	3
																						2021_02_16 R498 aSMA_gH2AX 60x Scar 2 arrows	R498	3
																						2021_02_16 R498 aSMA_gH2AX 60x Scar 2 arrows	R498	1
																						2021_02_16 R498 aSMA_gH2AX 60x Scar 2 arrows	R498	2
																						2021_02_16 R498 aSMA_gH2AX 60x Scar 2 arrows	R498	3
																						2021_02_16 R498 aSMA_gH2AX 60x Scar 2 arrows	R498	1
																						2021_02_16 R498 aSMA_gH2AX 60x Scar 2 arrows	R498	3
																						2021_02_16 R498 aSMA_gH2AX 60x Scar 2 arrows	R498	1
																						2021_02_16 R498 aSMA_gH2AX 60x Scar 2 arrows	R498	5
																						2021_02_16 R498 aSMA_gH2AX 60x Scar 2 arrows	R498	1
																						2021_02_16 R498 aSMA_gH2AX 60x Scar 3 arrows	R498	4
																						2021_02_16 R498 aSMA_gH2AX 60x Scar 3 arrows	R498	4
																						2021_02_16 R498 aSMA_gH2AX 60x Scar 3 arrows	R498	1
																						2021_02_16 R498 aSMA_gH2AX 60x Scar 3 arrows	R498	2
																						2021_02_16 R498 aSMA_gH2AX 60x Scar 3 arrows	R498	1
																						2021_02_16 R498 aSMA_gH2AX 60x Scar 3 arrows	R498	2
																						2021_02_16 R498 aSMA_gH2AX 60x Scar 3 arrows	R498	1
																						2021_02_16 R498 aSMA_gH2AX 60x Scar 3 arrows	R498	2
																						2021_02_16 R498 aSMA_gH2AX 60x Scar 3 arrows	R498	4
																						2021_02_16 R498 aSMA_gH2AX 60x Scar 3 arrows	R498	1
																						2021_02_16 R498 aSMA_gH2AX 60x Scar 4 arrows	R498	2
																						2021_02_16 R498 aSMA_gH2AX 60x Scar 4 arrows	R498	4
																						2021_02_16 R498 aSMA_gH2AX 60x Scar 4 arrows	R498	5
																						2021_02_16 R498 aSMA_gH2AX 60x Scar 4 arrows	R498	3
																						2021_02_16 R498 aSMA_gH2AX 60x Scar 4 arrows	R498	3
																						2021_02_16 R498 aSMA_gH2AX 60x Scar 4 arrows	R498	1
																						2021_02_16 R498 aSMA_gH2AX 60x Scar 4 arrows	R498	4
																						2021_02_16 R498 aSMA_gH2AX 60x Scar 5 arrows	R498	1
																						2021_02_16 R498 aSMA_gH2AX 60x Scar 5 arrows	R498	1	1
																						2021_02_16 R498 aSMA_gH2AX 60x Scar 5 arrows	R498	2
																						2021_02_16 R498 aSMA_gH2AX 60x Scar 5 arrows	R498	4
																						2021_02_16 R498 aSMA_gH2AX 60x Scar 5 arrows	R498	2
																						2021_02_16 R498 aSMA_gH2AX 60x Scar 5 arrows	R498	1
																						2021_02_16 R498 aSMA_gH2AX 60x Scar 5 arrows	R498	3
																						2021_02_16 R498 aSMA_gH2AX 60x Scar 5 arrows	R498	2
																						2021_02_16 R498 aSMA_gH2AX 60x Scar 5 arrows	R498	1	1
																						2021_02_16 R498 aSMA_gH2AX 60x Scar 5 arrows	R498	1
																						2021_02_16 R498 aSMA_gH2AX 60x Scar 5 arrows	R498	1
																						2021_02_16 R498 aSMA_gH2AX 60x Scar 5 arrows	R498	4
																						2021_02_16 X103 aSMA_gH2AX 60x Scar 1 arrows	X103	2
																						2021_02_16 X103 aSMA_gH2AX 60x Scar 1 arrows	X103	3
																						2021_02_16 X103 aSMA_gH2AX 60x Scar 1 arrows	X103	1
																						2021_02_16 X103 aSMA_gH2AX 60x Scar 1 arrows	X103	2
																						2021_02_16 X103 aSMA_gH2AX 60x Scar 1 arrows	X103	1
																						2021_02_16 X103 aSMA_gH2AX 60x Scar 1 arrows	X103	2
																						2021_02_16 X103 aSMA_gH2AX 60x Scar 1 arrows	X103	5
																						2021_02_16 X103 aSMA_gH2AX 60x Scar 1 arrows	X103	1
																						2021_02_16 X103 aSMA_gH2AX 60x Scar 1 arrows	X103	1
																						2021_02_16 X103 aSMA_gH2AX 60x Scar 2 arrows	X103	1
																						2021_02_16 X103 aSMA_gH2AX 60x Scar 2 arrows	X103	1
																						2021_02_16 X103 aSMA_gH2AX 60x Scar 2 arrows	X103	1
																						2021_02_16 X103 aSMA_gH2AX 60x Scar 2 arrows	X103	1
																						2021_02_16 X103 aSMA_gH2AX 60x Scar 2 arrows	X103	1
																						2021_02_16 X103 aSMA_gH2AX 60x Scar 3 arrows	X103
																						2021_02_16 X103 aSMA_gH2AX 60x Scar 4 arrows	X103	2
																						2021_02_16 X103 aSMA_gH2AX 60x Scar 5 arrows	X103	1
																						2021_02_16 X221 aSMA_gH2AX 60x Scar 1 arrows	X221	2
																						2021_02_16 X221 aSMA_gH2AX 60x Scar 1 arrows	X221	2
																						2021_02_16 X221 aSMA_gH2AX 60x Scar 1 arrows	X221	3
																						2021_02_16 X221 aSMA_gH2AX 60x Scar 1 arrows	X221	1
																						2021_02_16 X221 aSMA_gH2AX 60x Scar 1 arrows	X221	2
																						2021_02_16 X221 aSMA_gH2AX 60x Scar 2 arrows	X221	1
																						2021_02_16 X221 aSMA_gH2AX 60x Scar 2 arrows	X221	2
																						2021_02_16 X221 aSMA_gH2AX 60x Scar 2 arrows	X221	2
																						2021_02_16 X221 aSMA_gH2AX 60x Scar 2 arrows	X221	1
																						2021_02_16 X221 aSMA_gH2AX 60x Scar 2 arrows	X221	2
																						2021_02_16 X221 aSMA_gH2AX 60x Scar 2 arrows	X221	2
																						2021_02_16 X221 aSMA_gH2AX 60x Scar 2 arrows	X221	1
																						2021_02_16 X221 aSMA_gH2AX 60x Scar 2 arrows	X221	1
																						2021_02_16 X221 aSMA_gH2AX 60x Scar 2 arrows	X221	1
																						2021_02_16 X221 aSMA_gH2AX 60x Scar 2 arrows	X221	3
																						2021_02_16 X221 aSMA_gH2AX 60x Scar 2 arrows	X221	4
																						2021_02_16 X221 aSMA_gH2AX 60x Scar 2 arrows	X221	2
																						2021_02_16 X221 aSMA_gH2AX 60x Scar 2 arrows	X221	1
																						2021_02_16 X221 aSMA_gH2AX 60x Scar 2 arrows	X221	2
																						2021_02_16 X221 aSMA_gH2AX 60x Scar 2 arrows	X221	3
																						2021_02_16 X221 aSMA_gH2AX 60x Scar 3 arrows	X221	2
																						2021_02_16 X221 aSMA_gH2AX 60x Scar 3 arrows	X221	2
																						2021_02_16 X221 aSMA_gH2AX 60x Scar 3 arrows	X221	1
																						2021_02_16 X221 aSMA_gH2AX 60x Scar 3 arrows	X221	1
																						2021_02_16 X221 aSMA_gH2AX 60x Scar 3 arrows	X221	3
																						2021_02_16 X221 aSMA_gH2AX 60x Scar 3 arrows	X221	1
																						2021_02_16 X221 aSMA_gH2AX 60x Scar 3 arrows	X221	1	2
																						2021_02_16 X221 aSMA_gH2AX 60x Scar 3 arrows	X221	1	2
																						2021_02_16 X221 aSMA_gH2AX 60x Scar 3 arrows	X221	1	2
																						2021_02_16 X221 aSMA_gH2AX 60x Scar 3 arrows	X221	3	2
																						2021_02_16 X221 aSMA_gH2AX 60x Scar 3 arrows	X221	1	1
																						2021_02_16 X221 aSMA_gH2AX 60x Scar 3 arrows	X221		1
																						2021_02_16 X221 aSMA_gH2AX 60x Scar 4 arrows	X221	4
																						2021_02_16 X221 aSMA_gH2AX 60x Scar 5 arrows	X221	2
																						2021_02_16 X221 aSMA_gH2AX 60x Scar 5 arrows	X221	1
																						2021_02_06 Slide065 F322 aSMA_gH2AX 60x Scar 1 arrows	F322	1
																						2021_02_06 Slide065 F322 aSMA_gH2AX 60x Scar 1 arrows	F322	1
																						2021_02_06 Slide065 F322 aSMA_gH2AX 60x Scar 1 arrows	F322	1
																						2021_02_06 Slide065 F322 aSMA_gH2AX 60x Scar 1 arrows	F322	1
																						2021_02_06 Slide065 F322 aSMA_gH2AX 60x Scar 1 arrows	F322	1
																						2021_02_06 Slide065 F322 aSMA_gH2AX 60x Scar 1 arrows	F322	2
																						2021_02_06 Slide065 F322 aSMA_gH2AX 60x Scar 1 arrows	F322	2
																						2021_02_06 Slide065 F322 aSMA_gH2AX 60x Scar 1 arrows	F322	1
																						2021_02_06 Slide065 F322 aSMA_gH2AX 60x Scar 1 arrows	F322	3
																						2021_02_06 Slide065 F322 aSMA_gH2AX 60x Scar 1 arrows	F322	1
																						2021_02_06 Slide065 F322 aSMA_gH2AX 60x Scar 1 arrows	F322	1
																						2021_02_06 Slide065 F322 aSMA_gH2AX 60x Scar 1 arrows	F322	3
																						2021_02_06 Slide065 F322 aSMA_gH2AX 60x Scar 1 arrows	F322	1
																						2021_02_06 Slide065 F322 aSMA_gH2AX 60x Scar 1 arrows	F322	3
																						2021_02_06 Slide065 F322 aSMA_gH2AX 60x Scar 1 arrows	F322	1
																						2021_02_06 Slide065 F322 aSMA_gH2AX 60x Scar 1 arrows	F322	1
																						2021_02_06 Slide065 F322 aSMA_gH2AX 60x Scar 1 arrows	F322	3
																						2021_02_06 Slide065 F322 aSMA_gH2AX 60x Scar 1 arrows	F322	1
																						2021_02_06 Slide065 F322 aSMA_gH2AX 60x Scar 2 arrows	F322	3
																						2021_02_06 Slide065 F322 aSMA_gH2AX 60x Scar 2 arrows	F322	1
																						2021_02_06 Slide065 F322 aSMA_gH2AX 60x Scar 2 arrows	F322	2	1
																						2021_02_06 Slide065 F322 aSMA_gH2AX 60x Scar 2 arrows	F322	2	2
																						2021_02_06 Slide065 F322 aSMA_gH2AX 60x Scar 2 arrows	F322	3
																						2021_02_06 Slide065 F322 aSMA_gH2AX 60x Scar 3 arrows	F322	3
																						2021_02_06 Slide065 F322 aSMA_gH2AX 60x Scar 3 arrows	F322	1	4
																						2021_02_06 Slide065 F322 aSMA_gH2AX 60x Scar 3 arrows	F322	1
																						2021_02_06 Slide065 F322 aSMA_gH2AX 60x Scar 3 arrows	F322	2
																						2021_02_06 Slide065 F322 aSMA_gH2AX 60x Scar 3 arrows	F322	3
																						2021_02_06 Slide065 F322 aSMA_gH2AX 60x Scar 3 arrows	F322	1
																						2021_02_06 Slide065 F322 aSMA_gH2AX 60x Scar 3 arrows	F322	2
																						2021_02_06 Slide065 F322 aSMA_gH2AX 60x Scar 3 arrows	F322	2
																						2021_02_06 Slide065 F322 aSMA_gH2AX 60x Scar 3 arrows	F322	2
																						2021_02_06 Slide065 F322 aSMA_gH2AX 60x Scar 3 arrows	F322	2
																						2021_02_06 Slide065 F322 aSMA_gH2AX 60x Scar 4 arrows	F322	2	5
																						2021_02_06 Slide065 F322 aSMA_gH2AX 60x Scar 4 arrows	F322	1
																						2021_02_06 Slide065 F322 aSMA_gH2AX 60x Scar 4 arrows	F322	6
																						2021_02_06 Slide065 F322 aSMA_gH2AX 60x Scar 4 arrows	F322	4
																						2021_02_06 Slide065 F322 aSMA_gH2AX 60x Scar 4 arrows	F322	2	6
																						2021_02_06 Slide065 F322 aSMA_gH2AX 60x Scar 4 arrows	F322	4
																						2021_02_06 Slide065 F322 aSMA_gH2AX 60x Scar 4 arrows	F322	5
																						2021_02_06 Slide065 F322 aSMA_gH2AX 60x Scar 4 arrows	F322	3
																						2021_02_06 Slide065 F322 aSMA_gH2AX 60x Scar 4 arrows	F322	2
																						2021_02_06 Slide065 F322 aSMA_gH2AX 60x Scar 4 arrows	F322	3	1
																						2021_02_06 Slide065 F322 aSMA_gH2AX 60x Scar 4 arrows	F322	3
																						2021_02_06 Slide065 F322 aSMA_gH2AX 60x Scar 4 arrows	F322	9	1
																						2021_02_06 Slide065 F322 aSMA_gH2AX 60x Scar 4 arrows	F322		2
																						2021_02_06 Slide065 F322 aSMA_gH2AX 60x Scar 5 arrows	F322	1
																						2021_02_06 Slide065 F322 aSMA_gH2AX 60x Scar 5 arrows	F322	1
																						2021_02_06 Slide065 F322 aSMA_gH2AX 60x Scar 5 arrows	F322	3	3
																						2021_02_06 Slide065 F322 aSMA_gH2AX 60x Scar 5 arrows	F322	4	2
																						2021_02_06 Slide065 F322 aSMA_gH2AX 60x Scar 5 arrows	F322	3
																						2021_02_06 Slide065 F322 aSMA_gH2AX 60x Scar 5 arrows	F322	2
																						2021_02_06 Slide065 F322 aSMA_gH2AX 60x Scar 5 arrows	F322	4
																						2021_02_06 Slide065 F322 aSMA_gH2AX 60x Scar 5 arrows	F322	1
																						2021_02_06 Slide069 X115 aSMA_gH2AX 60x Scar 1 arrows	X115
																						2021_02_06 Slide069 X115 aSMA_gH2AX 60x Scar 2 arrows	X115	1	1
																						2021_02_06 Slide069 X115 aSMA_gH2AX 60x Scar 3 arrows	X115	1
																						2021_02_06 Slide069 X115 aSMA_gH2AX 60x Scar 3 arrows	X115	1
																						2021_02_06 Slide069 X115 aSMA_gH2AX 60x Scar 3 arrows	X115	1
																						2021_02_06 Slide069 X115 aSMA_gH2AX 60x Scar 4 arrows	X115	1
																						2021_02_06 Slide069 X115 aSMA_gH2AX 60x Scar 4 arrows	X115	2
																						2021_02_06 Slide069 X115 aSMA_gH2AX 60x Scar 4 arrows	X115	1
																						2021_02_06 Slide069 X115 aSMA_gH2AX 60x Scar 5 arrows	X115	1
																						2021_02_06 Slide069 X115 aSMA_gH2AX 60x Scar 5 arrows	X115	2
																						2021_04_22 SlideX Rabbit 554 aSMA_gH2AX 60x Scar 1 arrows	554	8	3
																						2021_04_22 SlideX Rabbit 554 aSMA_gH2AX 60x Scar 1 arrows	554	4	5
																						2021_04_22 SlideX Rabbit 554 aSMA_gH2AX 60x Scar 1 arrows	554		2
																						2021_04_22 SlideX Rabbit 554 aSMA_gH2AX 60x Scar 1 arrows	554	4	3
																						2021_04_22 SlideX Rabbit 554 aSMA_gH2AX 60x Scar 1 arrows	554	1
																						2021_04_22 SlideX Rabbit 554 aSMA_gH2AX 60x Scar 1 arrows	554	1	7
																						2021_04_22 SlideX Rabbit 554 aSMA_gH2AX 60x Scar 1 arrows	554		2
																						2021_04_22 SlideX Rabbit 554 aSMA_gH2AX 60x Scar 1 arrows	554		2
																						2021_04_22 SlideX Rabbit 554 aSMA_gH2AX 60x Scar 1 arrows	554	4	3
																						2021_04_22 SlideX Rabbit 554 aSMA_gH2AX 60x Scar 2 arrows	554		2
																						2021_04_22 SlideX Rabbit 554 aSMA_gH2AX 60x Scar 2 arrows	554		4
																						2021_04_22 SlideX Rabbit 554 aSMA_gH2AX 60x Scar 2 arrows	554		1
																						2021_04_22 SlideX Rabbit 554 aSMA_gH2AX 60x Scar 2 arrows	554		3
																						2021_04_22 SlideX Rabbit 554 aSMA_gH2AX 60x Scar 2 arrows	554		3
																						2021_04_22 SlideX Rabbit 554 aSMA_gH2AX 60x Scar 2 arrows	554	1	1
																						2021_04_22 SlideX Rabbit 554 aSMA_gH2AX 60x Scar 2 arrows	554	1	3
																						2021_04_22 SlideX Rabbit 554 aSMA_gH2AX 60x Scar 2 arrows	554		2
																						2021_04_22 SlideX Rabbit 554 aSMA_gH2AX 60x Scar 2 arrows	554		3
																						2021_04_22 SlideX Rabbit 554 aSMA_gH2AX 60x Scar 2 arrows	554	2	1
																						2021_04_22 SlideX Rabbit 554 aSMA_gH2AX 60x Scar 2 arrows	554	1	3
																						2021_04_22 SlideX Rabbit 554 aSMA_gH2AX 60x Scar 2 arrows	554		3
																						2021_04_22 SlideX Rabbit 554 aSMA_gH2AX 60x Scar 2 arrows	554		8
																						2021_04_22 SlideX Rabbit 554 aSMA_gH2AX 60x Scar 3 arrows	554	3	4
																						2021_04_22 SlideX Rabbit 554 aSMA_gH2AX 60x Scar 3 arrows	554		1
																						2021_04_22 SlideX Rabbit 554 aSMA_gH2AX 60x Scar 3 arrows	554		3
																						2021_04_22 SlideX Rabbit 554 aSMA_gH2AX 60x Scar 3 arrows	554		1
																						2021_04_22 SlideX Rabbit 554 aSMA_gH2AX 60x Scar 3 arrows	554		1
																						2021_04_22 SlideX Rabbit 554 aSMA_gH2AX 60x Scar 3 arrows	554		1
																						2021_04_22 SlideX Rabbit 554 aSMA_gH2AX 60x Scar 3 arrows	554		3
																						2021_04_22 SlideX Rabbit 554 aSMA_gH2AX 60x Scar 3 arrows	554		2
																						2021_04_22 SlideX Rabbit 554 aSMA_gH2AX 60x Scar 3 arrows	554		2
																						2021_04_22 SlideX Rabbit 554 aSMA_gH2AX 60x Scar 3 arrows	554		4
																						2021_04_22 SlideX Rabbit 554 aSMA_gH2AX 60x Scar 3 arrows	554		3
																						2021_04_22 SlideX Rabbit 554 aSMA_gH2AX 60x Scar 3 arrows	554		5
																						2021_04_22 SlideX Rabbit 554 aSMA_gH2AX 60x Scar 3 arrows	554		3
																						2021_04_22 SlideX Rabbit 554 aSMA_gH2AX 60x Scar 3 arrows	554		2
																						2021_04_22 SlideX Rabbit 554 aSMA_gH2AX 60x Scar 3 arrows	554		1
																						2021_04_22 SlideX Rabbit 554 aSMA_gH2AX 60x Scar 3 arrows	554		5
																						2021_04_22 SlideX Rabbit 554 aSMA_gH2AX 60x Scar 3 arrows	554		6
																						2021_04_22 SlideX Rabbit 554 aSMA_gH2AX 60x Scar 3 arrows	554		5
																						2021_04_22 SlideX Rabbit 554 aSMA_gH2AX 60x Scar 3 arrows	554		3
																						2021_04_22 SlideX Rabbit 554 aSMA_gH2AX 60x Scar 3 arrows	554	3	3
																						2021_04_22 SlideX Rabbit 554 aSMA_gH2AX 60x Scar 3 arrows	554		5
																						2021_04_22 SlideX Rabbit 554 aSMA_gH2AX 60x Scar 3 arrows	554		1
																						2021_04_22 SlideX Rabbit 554 aSMA_gH2AX 60x Scar 3 arrows	554		1
																						2021_04_22 SlideX Rabbit 554 aSMA_gH2AX 60x Scar 4 arrows	554	4	3
																						2021_04_22 SlideX Rabbit 554 aSMA_gH2AX 60x Scar 4 arrows	554	3	5
																						2021_04_22 SlideX Rabbit 554 aSMA_gH2AX 60x Scar 4 arrows	554		4
																						2021_04_22 SlideX Rabbit 554 aSMA_gH2AX 60x Scar 4 arrows	554		1
																						2021_04_22 SlideX Rabbit 554 aSMA_gH2AX 60x Scar 4 arrows	554		5
																						2021_04_22 SlideX Rabbit 554 aSMA_gH2AX 60x Scar 4 arrows	554		1
																						2021_04_22 SlideX Rabbit 554 aSMA_gH2AX 60x Scar 4 arrows	554		2
																						2021_04_22 SlideX Rabbit 554 aSMA_gH2AX 60x Scar 4 arrows	554		2
																						2021_04_22 SlideX Rabbit 554 aSMA_gH2AX 60x Scar 4 arrows	554		1
																						2021_04_22 SlideX Rabbit 554 aSMA_gH2AX 60x Scar 4 arrows	554	2	4
																						2021_04_22 SlideX Rabbit 554 aSMA_gH2AX 60x Scar 4 arrows	554		3
																						2021_04_22 SlideX Rabbit 554 aSMA_gH2AX 60x Scar 4 arrows	554		4
																						2021_04_22 SlideX Rabbit 554 aSMA_gH2AX 60x Scar 4 arrows	554		3
																						2021_04_22 SlideX Rabbit 554 aSMA_gH2AX 60x Scar 4 arrows	554		3
																						2021_04_22 SlideX Rabbit 554 aSMA_gH2AX 60x Scar 4 arrows	554	1	1
																						2021_04_22 SlideX Rabbit 554 aSMA_gH2AX 60x Scar 4 arrows	554		3
																						2021_04_22 SlideX Rabbit 554 aSMA_gH2AX 60x Scar 5 arrows	554		3
																						2021_04_22 SlideX Rabbit 554 aSMA_gH2AX 60x Scar 5 arrows	554		2
																						2021_04_22 SlideX Rabbit 554 aSMA_gH2AX 60x Scar 5 arrows	554		3
																						2021_04_22 SlideX Rabbit 554 aSMA_gH2AX 60x Scar 5 arrows	554		1
																						2021_04_22 SlideX Rabbit 554 aSMA_gH2AX 60x Scar 5 arrows	554		2
																						2021_04_22 SlideX Rabbit 554 aSMA_gH2AX 60x Scar 5 arrows	554		5
																						2021_04_22 SlideX Rabbit 554 aSMA_gH2AX 60x Scar 5 arrows	554		3
																						2021_04_22 SlideX Rabbit 554 aSMA_gH2AX 60x Scar 5 arrows	554		1
																						2021_04_22 SlideX Rabbit 554 aSMA_gH2AX 60x Scar 5 arrows	554		1
																						2021_04_22 SlideX Rabbit 554 aSMA_gH2AX 60x Scar 5 arrows	554		3
																						2021_04_22 SlideX Rabbit 554 aSMA_gH2AX 60x Scar 5 arrows	554		6
																						2021_04_22 SlideX Rabbit 554 aSMA_gH2AX 60x Scar 5 arrows	554		3
																						2021_04_22 SlideX Rabbit 554 aSMA_gH2AX 60x Scar 5 arrows	554		4
																						2021_04_22 SlideX Rabbit 554 aSMA_gH2AX 60x Scar 5 arrows	554		5
																						2021_04_22 SlideX Rabbit 554 aSMA_gH2AX 60x Scar 5 arrows	554		1
																						2021_04_22 SlideX Rabbit 554 aSMA_gH2AX 60x Scar 5 arrows	554		2
																						2021_04_22 Slide178 R4304 aSMA_gH2AX 60X IBZ 1 arrows	R4304	1
																						2021_04_22 Slide178 R4304 aSMA_gH2AX 60X IBZ 1 arrows	R4304	2
																						2021_04_22 Slide178 R4304 aSMA_gH2AX 60X IBZ 1 arrows	R4304	3
																						2021_04_22 Slide178 R4304 aSMA_gH2AX 60X IBZ 2 arrows	R4304	1
																						2021_04_22 Slide178 R4304 aSMA_gH2AX 60X IBZ 2 arrows	R4304	1	1
																						2021_04_22 Slide178 R4304 aSMA_gH2AX 60X IBZ 2 arrows	R4304	1
																						2021_04_22 Slide178 R4304 aSMA_gH2AX 60X IBZ 3 arrows	R4304	2
																						2021_04_22 Slide178 R4304 aSMA_gH2AX 60X IBZ 3 arrows	R4304	2
																						2021_04_22 Slide178 R4304 aSMA_gH2AX 60X IBZ 3 arrows	R4304	1
																						2021_04_22 Slide178 R4304 aSMA_gH2AX 60X IBZ 3 arrows	R4304	1
																						2021_04_22 Slide178 R4304 aSMA_gH2AX 60X IBZ 4 arrows	R4304	2
																						2021_04_22 Slide178 R4304 aSMA_gH2AX 60X IBZ 4 arrows	R4304	2
																						2021_04_22 Slide178 R4304 aSMA_gH2AX 60X IBZ 4 arrows	R4304	1
																						2021_04_22 Slide178 R4304 aSMA_gH2AX 60X IBZ 4 arrows	R4304	1
																						2021_04_22 Slide178 R4304 aSMA_gH2AX 60X IBZ 5 arrows	R4304	3
																						2021_04_22 Slide178 R4304 aSMA_gH2AX 60X IBZ 5 arrows	R4304	1
																						2021_04_22 Slide178 R4304 aSMA_gH2AX 60X IBZ 5 arrows	R4304	4
																						2021_04_22 Slide178 R4304 aSMA_gH2AX 60X IBZ 5 arrows	R4304	3
																						2021_04_22 Slide178 R4304 aSMA_gH2AX 60X IBZ 5 arrows	R4304	1
																						2021_04_22 Slide178 R4304 aSMA_gH2AX 60X IBZ 5 arrows	R4304	1
																						2021_04_22 Slide178 R4304 aSMA_gH2AX 60X IBZ 5 arrows	R4304	1
																						2021_04_22 Slide178 R4304 aSMA_gH2AX 60X IBZ 5 arrows	R4304	2
																						2021_04_22 Slide173 X227 aSMA_gH2AX 60x IBZ 1 arrows	X227	2
																						2021_04_22 Slide173 X227 aSMA_gH2AX 60x IBZ 1 arrows	X227	1
																						2021_04_22 Slide173 X227 aSMA_gH2AX 60x IBZ 1 arrows	X227	1
																						2021_04_22 Slide173 X227 aSMA_gH2AX 60x IBZ 2 arrows	X227	4
																						2021_04_22 Slide173 X227 aSMA_gH2AX 60x IBZ 2 arrows	X227	1
																						2021_04_22 Slide173 X227 aSMA_gH2AX 60x IBZ 3 arrows	X227	1
																						2021_04_22 Slide173 X227 aSMA_gH2AX 60x IBZ 5 arrows	X227	1	1
																						2021_04_22 Slide173 X227 aSMA_gH2AX 60x IBZ 5 arrows	X227	1
																						2021_04_20 Slide177 R126 aSMA_gH2AX 60X IBZ 1 arrows	R126	4
																						2021_04_20 Slide177 R126 aSMA_gH2AX 60X IBZ 1 arrows	R126	1
																						2021_04_20 Slide177 R126 aSMA_gH2AX 60X IBZ 1 arrows	R126	1	3
																						2021_04_20 Slide177 R126 aSMA_gH2AX 60X IBZ 2 arrows	R126	3
																						2021_04_20 Slide177 R126 aSMA_gH2AX 60X IBZ 2 arrows	R126	3
																						2021_04_20 Slide177 R126 aSMA_gH2AX 60X IBZ 3 arrows	R126	6
																						2021_04_20 Slide177 R126 aSMA_gH2AX 60X IBZ 3 arrows	R126	1
																						2021_04_20 Slide177 R126 aSMA_gH2AX 60X IBZ 3 arrows	R126	3
																						2021_04_20 Slide177 R126 aSMA_gH2AX 60X IBZ 3 arrows	R126	1
																						2021_04_20 Slide177 R126 aSMA_gH2AX 60X IBZ 3 arrows	R126	3
																						2021_04_20 Slide177 R126 aSMA_gH2AX 60X IBZ 3 arrows	R126	1
																						2021_04_20 Slide177 R126 aSMA_gH2AX 60X IBZ 4 arrows	R126	2
																						2021_04_20 Slide177 R126 aSMA_gH2AX 60X IBZ 4 arrows	R126	3
																						2021_04_20 Slide177 R126 aSMA_gH2AX 60X IBZ 4 arrows	R126	5
																						2021_04_20 Slide177 R126 aSMA_gH2AX 60X IBZ 4 arrows	R126	3
																						2021_04_20 Slide177 R126 aSMA_gH2AX 60X IBZ 4 arrows	R126	4
																						2021_04_20 Slide177 R126 aSMA_gH2AX 60X IBZ 4 arrows	R126	1
																						2021_04_20 Slide177 R126 aSMA_gH2AX 60X IBZ 4 arrows	R126	1
																						2021_04_20 Slide177 R126 aSMA_gH2AX 60X IBZ 4 arrows	R126	2
																						2021_04_20 Slide177 R126 aSMA_gH2AX 60X IBZ 4 arrows	R126	2
																						2021_04_20 Slide177 R126 aSMA_gH2AX 60X IBZ 4 arrows	R126	12
																						2021_04_20 Slide176 F427 aSMA_gH2AX 60X IBZ 1 arrows	F427	3
																						2021_04_20 Slide176 F427 aSMA_gH2AX 60X IBZ 1 arrows	F427	4
																						2021_04_20 Slide176 F427 aSMA_gH2AX 60X IBZ 1 arrows	F427	1
																						2021_04_20 Slide176 F427 aSMA_gH2AX 60X IBZ 2 arrows	F427	3	10
																						2021_04_20 Slide176 F427 aSMA_gH2AX 60X IBZ 2 arrows	F427	4	4
																						2021_04_20 Slide176 F427 aSMA_gH2AX 60X IBZ 2 arrows	F427	1	2
																						2021_04_20 Slide176 F427 aSMA_gH2AX 60X IBZ 2 arrows	F427	2
																						2021_04_20 Slide176 F427 aSMA_gH2AX 60X IBZ 2 arrows	F427	3
																						2021_04_20 Slide176 F427 aSMA_gH2AX 60X IBZ 3 arrows	F427	1	3
																						2021_04_20 Slide176 F427 aSMA_gH2AX 60X IBZ 3 arrows	F427	5	1
																						2021_04_20 Slide176 F427 aSMA_gH2AX 60X IBZ 3 arrows	F427	3	6
																						2021_04_20 Slide176 F427 aSMA_gH2AX 60X IBZ 3 arrows	F427		2
																						2021_04_20 Slide176 F427 aSMA_gH2AX 60X IBZ 3 arrows	F427	1	5
																						2021_04_20 Slide176 F427 aSMA_gH2AX 60X IBZ 3 arrows	F427	1	1
																						2021_04_20 Slide176 F427 aSMA_gH2AX 60X IBZ 3 arrows	F427	1	2
																						2021_04_20 Slide176 F427 aSMA_gH2AX 60X IBZ 3 arrows	F427	2	1
																						2021_04_20 Slide176 F427 aSMA_gH2AX 60X IBZ 4 arrows	F427	3
																						2021_04_20 Slide176 F427 aSMA_gH2AX 60X IBZ 4 arrows	F427	1
																						2021_04_20 Slide176 F427 aSMA_gH2AX 60X IBZ 4 arrows	F427	2
																						2021_04_20 Slide176 F427 aSMA_gH2AX 60X IBZ 4 arrows	F427	2
																						2021_04_20 Slide176 F427 aSMA_gH2AX 60X IBZ 4 arrows	F427	1
																						2021_04_20 Slide176 F427 aSMA_gH2AX 60X IBZ 4 arrows	F427	1
																						2021_04_20 Slide176 F427 aSMA_gH2AX 60X IBZ 4 arrows	F427	3
																						2021_04_20 Slide176 F427 aSMA_gH2AX 60X IBZ 4 arrows	F427	3
																						2021_04_20 Slide176 F427 aSMA_gH2AX 60X IBZ 4 arrows	F427	2	4
																						2021_04_20 Slide176 F427 aSMA_gH2AX 60X IBZ 5 arrows	F427	4	4
																						2021_04_20 Slide176 F427 aSMA_gH2AX 60X IBZ 5 arrows	F427	1	1
																						2021_04_20 Slide176 F427 aSMA_gH2AX 60X IBZ 5 arrows	F427	4	2
																						2021_04_20 Slide176 F427 aSMA_gH2AX 60X IBZ 5 arrows	F427	1
																						2021_04_20 Slide176 F427 aSMA_gH2AX 60X IBZ 5 arrows	F427	2
																						2021_04_20 Slide176 F427 aSMA_gH2AX 60X IBZ 5 arrows	F427	3	4
																						2021_04_20 Slide176 F427 aSMA_gH2AX 60X IBZ 5 arrows	F427	1	3
																						2021_04_20 Slide176 F427 aSMA_gH2AX 60X IBZ 5 arrows	F427	3
																						2021_04_20 Slide176 F427 aSMA_gH2AX 60X IBZ 5 arrows	F427	1
																						2021_04_20 Slide176 F427 aSMA_gH2AX 60X IBZ 5 arrows	F427	1
																						2021_04_20 Slide176 F427 aSMA_gH2AX 60X IBZ 5 arrows	F427	4
																						2021_04_20 Slide176 F427 aSMA_gH2AX 60X IBZ 5 arrows	F427	1
																						2021_04_20 Slide176 F427 aSMA_gH2AX 60X IBZ 5 arrows	F427	1	1
																						2021_04_20 Slide176 F427 aSMA_gH2AX 60X IBZ 5 arrows	F427	2	3
																						2021_05_29 Slide057 X221 aSMA_gH2AX 60x IBZ 4	X221	1	2
																						2021_05_29 Slide057 X221 aSMA_gH2AX 60x IBZ 4	X221	1	2
																						2021_05_29 Slide057 X221 aSMA_gH2AX 60x IBZ 4	X221	2	3
																						2021_05_29 Slide057 X221 aSMA_gH2AX 60x IBZ 4	X221		2
																						2021_05_29 Slide057 X221 aSMA_gH2AX 60x IBZ 4	X221		1
																						2021_05_29 Slide057 X221 aSMA_gH2AX 60x IBZ 3	X221	1	3
																						2021_05_29 Slide057 X221 aSMA_gH2AX 60x IBZ 3	X221	1	3
																						2021_05_29 Slide057 X221 aSMA_gH2AX 60x IBZ 3	X221	3
																						2021_05_29 Slide057 X221 aSMA_gH2AX 60x IBZ 2	X221		1
																						2021_05_29 Slide057 X221 aSMA_gH2AX 60x IBZ 2	X221		1
																						2021_05_29 Slide057 X221 aSMA_gH2AX 60x IBZ 1	X221	1	1
																						2021_05_29 Slide057 X221 aSMA_gH2AX 60x IBZ 1	X221	1	1
																						2021_05_28 Slide193 3890 aSMA_gH2AX 60x IBZ 5	3890		3
																						2021_05_28 Slide193 3890 aSMA_gH2AX 60x IBZ 5	3890
																						2021_05_28 Slide193 3890 aSMA_gH2AX 60x IBZ 5	3890
																						2021_05_28 Slide193 3890 aSMA_gH2AX 60x IBZ 5	3890
																						2021_05_28 Slide193 3890 aSMA_gH2AX 60x IBZ 4	3890		2
																						2021_05_28 Slide193 3890 aSMA_gH2AX 60x IBZ 4	3890		2
																						2021_05_28 Slide193 3890 aSMA_gH2AX 60x IBZ 4	3890		2
																						2021_05_28 Slide193 3890 aSMA_gH2AX 60x IBZ 4	3890	1	5
																						2021_05_28 Slide193 3890 aSMA_gH2AX 60x IBZ 4	3890	1	1
																						2021_05_28 Slide193 3890 aSMA_gH2AX 60x IBZ 3	3890	1	2
																						2021_05_28 Slide193 3890 aSMA_gH2AX 60x IBZ 3	3890		3
																						2021_05_28 Slide193 3890 aSMA_gH2AX 60x IBZ 3	3890		1
																						2021_05_28 Slide193 3890 aSMA_gH2AX 60x IBZ 3	3890		2
																						2021_05_28 Slide193 3890 aSMA_gH2AX 60x IBZ 3	3890		1
																						2021_05_28 Slide193 3890 aSMA_gH2AX 60x IBZ 3	3890		2
																						2021_05_28 Slide193 3890 aSMA_gH2AX 60x IBZ 3	3890		2
																						2021_05_28 Slide193 3890 aSMA_gH2AX 60x IBZ 2	3890		3
																						2021_05_28 Slide193 3890 aSMA_gH2AX 60x IBZ 2	3890		2
																						2021_05_28 Slide193 3890 aSMA_gH2AX 60x IBZ 2	3890		1
																						2021_05_28 Slide193 3890 aSMA_gH2AX 60x IBZ 2	3890		1
																						2021_05_28 Slide193 3890 aSMA_gH2AX 60x IBZ 1	3890	2	4
																						2021_05_28 Slide193 3890 aSMA_gH2AX 60x IBZ 1	3890		2
																						2021_05_28 Slide193 3890 aSMA_gH2AX 60x IBZ 1	3890		2
																						2021_05_28 Slide193 3890 aSMA_gH2AX 60x IBZ 1	3890		1
																						2021_05_28 Slide193 3890 aSMA_gH2AX 60x IBZ 1	3890		1
																						2021_05_28 Slide193 3890 aSMA_gH2AX 60x IBZ 1	3890
																						2021_05_28 Slide193 3890 aSMA_gH2AX 60x IBZ 1	3890
																						2021_05_28 Slide193 3890 aSMA_gH2AX 60x IBZ 1	3890
																						2021_05_28 Slide193 3890 aSMA_gH2AX 60x IBZ 1	3890
																						2021_05_28 Slide193 3890 aSMA_gH2AX 60x IBZ 1	3890
																						2021_05_28 Slide193 3890 aSMA_gH2AX 60x IBZ 1	3890
																						2021_05_28 Slide193 3890 aSMA_gH2AX 60x IBZ 1	3890
																						2021_05_28 Slide193 3890 aSMA_gH2AX 60x IBZ 1	3890
																						2021_05_28 Slide192 X230 aSMA_gH2AX 60x IBZ 5	X230		3
																						2021_05_28 Slide192 X230 aSMA_gH2AX 60x IBZ 5	X230		1
																						2021_05_28 Slide192 X230 aSMA_gH2AX 60x IBZ 5	X230		1
																						2021_05_28 Slide192 X230 aSMA_gH2AX 60x IBZ 5	X230		1
																						2021_05_28 Slide192 X230 aSMA_gH2AX 60x IBZ 5	X230		1
																						2021_05_28 Slide192 X230 aSMA_gH2AX 60x IBZ 5	X230		2
																						2021_05_28 Slide192 X230 aSMA_gH2AX 60x IBZ 5	X230		2
																						2021_05_28 Slide192 X230 aSMA_gH2AX 60x IBZ 5	X230		2
																						2021_05_28 Slide192 X230 aSMA_gH2AX 60x IBZ 5	X230		2
																						2021_05_28 Slide192 X230 aSMA_gH2AX 60x IBZ 5	X230		3
																						2021_05_28 Slide192 X230 aSMA_gH2AX 60x IBZ 5	X230		2
																						2021_05_28 Slide192 X230 aSMA_gH2AX 60x IBZ 5	X230		1
																						2021_05_28 Slide192 X230 aSMA_gH2AX 60x IBZ 4	X230	3	2
																						2021_05_28 Slide192 X230 aSMA_gH2AX 60x IBZ 4	X230	1	1
																						2021_05_28 Slide192 X230 aSMA_gH2AX 60x IBZ 4	X230	2	3
																						2021_05_28 Slide192 X230 aSMA_gH2AX 60x IBZ 4	X230	1	2
																						2021_05_28 Slide192 X230 aSMA_gH2AX 60x IBZ 4	X230	3	2
																						2021_05_28 Slide192 X230 aSMA_gH2AX 60x IBZ 4	X230		2
																						2021_05_28 Slide192 X230 aSMA_gH2AX 60x IBZ 4	X230		2
																						2021_05_28 Slide192 X230 aSMA_gH2AX 60x IBZ 3	X230		1
																						2021_05_28 Slide192 X230 aSMA_gH2AX 60x IBZ 3	X230		1
																						2021_05_28 Slide192 X230 aSMA_gH2AX 60x IBZ 3	X230		2
																						2021_05_28 Slide192 X230 aSMA_gH2AX 60x IBZ 3	X230		3
																						2021_05_28 Slide192 X230 aSMA_gH2AX 60x IBZ 3	X230		1
																						2021_05_28 Slide192 X230 aSMA_gH2AX 60x IBZ 3	X230	3	4
																						2021_05_28 Slide192 X230 aSMA_gH2AX 60x IBZ 3	X230		1
																						2021_05_28 Slide192 X230 aSMA_gH2AX 60x IBZ 3	X230		4
																						2021_05_28 Slide192 X230 aSMA_gH2AX 60x IBZ 3	X230		2
																						2021_05_28 Slide192 X230 aSMA_gH2AX 60x IBZ 3	X230		2
																						2021_05_28 Slide192 X230 aSMA_gH2AX 60x IBZ 3	X230		3
																						2021_05_28 Slide192 X230 aSMA_gH2AX 60x IBZ 2	X230	3
																						2021_05_28 Slide192 X230 aSMA_gH2AX 60x IBZ 2	X230		1
																						2021_05_28 Slide192 X230 aSMA_gH2AX 60x IBZ 2	X230	2	1
																						2021_05_28 Slide192 X230 aSMA_gH2AX 60x IBZ 2	X230	3	1
																						2021_05_28 Slide192 X230 aSMA_gH2AX 60x IBZ 2	X230		2
																						2021_05_28 Slide192 X230 aSMA_gH2AX 60x IBZ 2	X230		1
																						2021_05_28 Slide192 X230 aSMA_gH2AX 60x IBZ 2	X230		2
																						2021_05_28 Slide192 X230 aSMA_gH2AX 60x IBZ 1	X230	1	1
																						2021_05_28 Slide192 X230 aSMA_gH2AX 60x IBZ 1	X230	2	1
																						2021_05_28 Slide192 X230 aSMA_gH2AX 60x IBZ 1	X230	1	3
																						2021_05_28 Slide192 X230 aSMA_gH2AX 60x IBZ 1	X230	2	2
																						2021_05_28 Slide192 X230 aSMA_gH2AX 60x IBZ 1	X230	2
																						2021_05_28 Slide192 X230 aSMA_gH2AX 60x IBZ 1	X230	1
																						2021_05_28 Slide191 X228 aSMA_gH2AX 60x IBZ 5	X228		2
																						2021_05_28 Slide191 X228 aSMA_gH2AX 60x IBZ 5	X228		1
																						2021_05_28 Slide191 X228 aSMA_gH2AX 60x IBZ 5	X228		1
																						2021_05_28 Slide191 X228 aSMA_gH2AX 60x IBZ 5	X228		1
																						2021_05_28 Slide191 X228 aSMA_gH2AX 60x IBZ 5	X228		2
																						2021_05_28 Slide191 X228 aSMA_gH2AX 60x IBZ 5	X228		3
																						2021_05_28 Slide191 X228 aSMA_gH2AX 60x IBZ 5	X228		4
																						2021_05_28 Slide191 X228 aSMA_gH2AX 60x IBZ 4	X228		3
																						2021_05_28 Slide191 X228 aSMA_gH2AX 60x IBZ 4	X228		2
																						2021_05_28 Slide191 X228 aSMA_gH2AX 60x IBZ 4	X228		1
																						2021_05_28 Slide191 X228 aSMA_gH2AX 60x IBZ 4	X228		1
																						2021_05_28 Slide191 X228 aSMA_gH2AX 60x IBZ 3	X228	3	1
																						2021_05_28 Slide191 X228 aSMA_gH2AX 60x IBZ 3	X228	2	1
																						2021_05_28 Slide191 X228 aSMA_gH2AX 60x IBZ 3	X228		1
																						2021_05_28 Slide191 X228 aSMA_gH2AX 60x IBZ 3	X228		1
																						2021_05_28 Slide191 X228 aSMA_gH2AX 60x IBZ 3	X228		2
																						2021_05_28 Slide191 X228 aSMA_gH2AX 60x IBZ 3	X228		1
																						2021_05_28 Slide191 X228 aSMA_gH2AX 60x IBZ 3	X228		1
																						2021_05_28 Slide191 X228 aSMA_gH2AX 60x IBZ 3	X228		1
																						2021_05_28 Slide191 X228 aSMA_gH2AX 60x IBZ 3	X228		1
																						2021_05_28 Slide191 X228 aSMA_gH2AX 60x IBZ 3	X228		4
																						2021_05_28 Slide191 X228 aSMA_gH2AX 60x IBZ 3	X228		4
																						2021_05_28 Slide191 X228 aSMA_gH2AX 60x IBZ 3	X228		5
																						2021_05_28 Slide191 X228 aSMA_gH2AX 60x IBZ 3	X228		2
																						2021_05_28 Slide191 X228 aSMA_gH2AX 60x IBZ 2.nd2	X228		1
																						2021_05_28 Slide191 X228 aSMA_gH2AX 60x IBZ 2.nd2	X228		3
																						2021_05_28 Slide191 X228 aSMA_gH2AX 60x IBZ 2.nd2	X228		2
																						2021_05_28 Slide191 X228 aSMA_gH2AX 60x IBZ 2.nd2	X228		2
																						2021_05_28 Slide191 X228 aSMA_gH2AX 60x IBZ 2.nd2	X228		1
																						2021_05_28 Slide191 X228 aSMA_gH2AX 60x IBZ 2.nd2	X228		1
																						2021_05_28 Slide191 X228 aSMA_gH2AX 60x IBZ 2.nd2	X228		2
																						2021_05_28 Slide191 X228 aSMA_gH2AX 60x IBZ 2.nd2	X228		2
																						2021_05_28 Slide191 X228 aSMA_gH2AX 60x IBZ 2.nd2	X228		2
																						2021_05_28 Slide191 X228 aSMA_gH2AX 60x IBZ 2.nd2	X228		1
																						2021_05_28 Slide191 X228 aSMA_gH2AX 60x IBZ 2.nd2	X228		2
																						2021_05_28 Slide191 X228 aSMA_gH2AX 60x IBZ 2.nd2	X228		2
																						2021_05_28 Slide191 X228 aSMA_gH2AX 60x IBZ 2.nd2	X228		1
																						2021_05_28 Slide191 X228 aSMA_gH2AX 60x IBZ 1	X228		2
																						2021_05_28 Slide191 X228 aSMA_gH2AX 60x IBZ 1	X228		2
																						2021_05_28 Slide191 X228 aSMA_gH2AX 60x IBZ 1	X228		2
																						2021_05_28 Slide191 X228 aSMA_gH2AX 60x IBZ 1	X228		1
																						2021_05_28 Slide191 X228 aSMA_gH2AX 60x IBZ 1	X228		2
																						2021_05_28 Slide191 X228 aSMA_gH2AX 60x IBZ 1	X228		2
																						2021_05_28 Slide191 X228 aSMA_gH2AX 60x IBZ 1	X228		1
																						2021_05_27 Slide391 552 aSMA_gH2AX 60x Scar 5 - Deconvolved, Type Automatic	552		2
																						2021_05_27 Slide391 552 aSMA_gH2AX 60x Scar 5 - Deconvolved, Type Automatic	552		1
																						2021_05_27 Slide391 552 aSMA_gH2AX 60x Scar 5 - Deconvolved, Type Automatic	552		3
																						2021_05_27 Slide391 552 aSMA_gH2AX 60x Scar 5 - Deconvolved, Type Automatic	552		1
																						2021_05_27 Slide391 552 aSMA_gH2AX 60x Scar 5 - Deconvolved, Type Automatic	552		3
																						2021_05_27 Slide391 552 aSMA_gH2AX 60x Scar 5 - Deconvolved, Type Automatic	552		2
																						2021_05_27 Slide391 552 aSMA_gH2AX 60x Scar 5 - Deconvolved, Type Automatic	552		1
																						2021_05_27 Slide391 552 aSMA_gH2AX 60x Scar 5 - Deconvolved, Type Automatic	552		2
																						2021_05_27 Slide391 552 aSMA_gH2AX 60x Scar 4 - Deconvolved, Type Automatic	552		2
																						2021_05_27 Slide391 552 aSMA_gH2AX 60x Scar 4 - Deconvolved, Type Automatic	552		3
																						2021_05_27 Slide391 552 aSMA_gH2AX 60x Scar 4 - Deconvolved, Type Automatic	552		3
																						2021_05_27 Slide391 552 aSMA_gH2AX 60x Scar 4 - Deconvolved, Type Automatic	552		1
																						2021_05_27 Slide391 552 aSMA_gH2AX 60x Scar 4 - Deconvolved, Type Automatic	552		1
																						2021_05_27 Slide391 552 aSMA_gH2AX 60x Scar 4 - Deconvolved, Type Automatic	552		1
																						2021_05_27 Slide391 552 aSMA_gH2AX 60x Scar 4 - Deconvolved, Type Automatic	552		1
																						2021_05_27 Slide391 552 aSMA_gH2AX 60x Scar 4 - Deconvolved, Type Automatic	552		4
																						2021_05_27 Slide391 552 aSMA_gH2AX 60x Scar 3 - Deconvolved, Type Automatic	552		3
																						2021_05_27 Slide391 552 aSMA_gH2AX 60x Scar 3 - Deconvolved, Type Automatic	552		2
																						2021_05_27 Slide391 552 aSMA_gH2AX 60x Scar 3 - Deconvolved, Type Automatic	552		3
																						2021_05_27 Slide391 552 aSMA_gH2AX 60x Scar 3 - Deconvolved, Type Automatic	552		2
																						2021_05_27 Slide391 552 aSMA_gH2AX 60x Scar 3 - Deconvolved, Type Automatic	552		3
																						2021_05_27 Slide391 552 aSMA_gH2AX 60x Scar 3 - Deconvolved, Type Automatic	552		1
																						2021_05_27 Slide391 552 aSMA_gH2AX 60x Scar 3 - Deconvolved, Type Automatic	552		1
																						2021_05_27 Slide391 552 aSMA_gH2AX 60x Scar 3 - Deconvolved, Type Automatic	552		6
																						2021_05_27 Slide391 552 aSMA_gH2AX 60x Scar 3 - Deconvolved, Type Automatic	552		2
																						2021_05_27 Slide391 552 aSMA_gH2AX 60x Scar 3 - Deconvolved, Type Automatic	552		5
																						2021_05_27 Slide391 552 aSMA_gH2AX 60x Scar 3 - Deconvolved, Type Automatic	552		3
																						2021_05_27 Slide391 552 aSMA_gH2AX 60x Scar 3 - Deconvolved, Type Automatic	552		2
																						2021_05_27 Slide391 552 aSMA_gH2AX 60x Scar 3 - Deconvolved, Type Automatic	552		2
																						2021_05_27 Slide391 552 aSMA_gH2AX 60x Scar 3 - Deconvolved, Type Automatic	552		1
																						2021_05_27 Slide391 552 aSMA_gH2AX 60x Scar 2 - Deconvolved, Type Automatic	552		4
																						2021_05_27 Slide391 552 aSMA_gH2AX 60x Scar 2 - Deconvolved, Type Automatic	552		2
																						2021_05_27 Slide391 552 aSMA_gH2AX 60x Scar 2 - Deconvolved, Type Automatic	552		1
																						2021_05_27 Slide391 552 aSMA_gH2AX 60x Scar 2 - Deconvolved, Type Automatic	552		3
																						2021_05_27 Slide391 552 aSMA_gH2AX 60x Scar 2 - Deconvolved, Type Automatic	552		1
																						2021_05_27 Slide391 552 aSMA_gH2AX 60x Scar 2 - Deconvolved, Type Automatic	552		3
																						2021_05_27 Slide391 552 aSMA_gH2AX 60x Scar 2 - Deconvolved, Type Automatic	552		3
																						2021_05_27 Slide391 552 aSMA_gH2AX 60x Scar 2 - Deconvolved, Type Automatic	552		1
																						2021_05_27 Slide391 552 aSMA_gH2AX 60x Scar 1 - Deconvolved, Type Automatic	552		3
																						2021_05_27 Slide391 552 aSMA_gH2AX 60x Scar 1 - Deconvolved, Type Automatic	552		5
																						2021_05_27 Slide391 552 aSMA_gH2AX 60x Scar 1 - Deconvolved, Type Automatic	552		3
																						2021_05_27 Slide391 552 aSMA_gH2AX 60x Scar 1 - Deconvolved, Type Automatic	552		2
																						2021_05_27 Slide391 552 aSMA_gH2AX 60x Scar 1 - Deconvolved, Type Automatic	552		1
																						2021_05_27 Slide391 552 aSMA_gH2AX 60x Scar 1 - Deconvolved, Type Automatic	552	2	1
																						2021_05_27 Slide391 552 aSMA_gH2AX 60x Scar 1 - Deconvolved, Type Automatic	552		4
																						2021_05_27 Slide391 552 aSMA_gH2AX 60x Scar 1 - Deconvolved, Type Automatic	552		3
																						2021_05_27 Slide391 552 aSMA_gH2AX 60x Scar 1 - Deconvolved, Type Automatic	552		2
																						2021_05_27 Slide391 552 aSMA_gH2AX 60x Scar 1 - Deconvolved, Type Automatic	552		2
																						2021_05_27 Slide391 552 aSMA_gH2AX 60x Scar 1 - Deconvolved, Type Automatic	552	3	1
																						2021_05_27 Slide391 552 aSMA_gH2AX 60x Scar 1 - Deconvolved, Type Automatic	552		2
																						2021_05_27 Slide391 552 aSMA_gH2AX 60x Scar 1 - Deconvolved, Type Automatic	552		1
																						2021_05_27 Slide391 552 aSMA_gH2AX 60x Scar 1 - Deconvolved, Type Automatic	552	2	3
																						2021_05_27 Slide391 552 aSMA_gH2AX 60x Scar 1 - Deconvolved, Type Automatic	552		3
																						2021_05_27 Slide391 552 aSMA_gH2AX 60x Scar 1 - Deconvolved, Type Automatic	552		5
																						2012_06_06 Slide322 F985 aSMA_gH2AX 60x Scar 1 arrows	F985	3
																						2012_06_06 Slide322 F985 aSMA_gH2AX 60x Scar 1 arrows	F985	2	4
																						2012_06_06 Slide322 F985 aSMA_gH2AX 60x Scar 1 arrows	F985		3
																						2012_06_06 Slide322 F985 aSMA_gH2AX 60x Scar 1 arrows	F985	3	4
																						2012_06_06 Slide322 F985 aSMA_gH2AX 60x Scar 1 arrows	F985	1
																						2012_06_06 Slide322 F985 aSMA_gH2AX 60x Scar 1 arrows	F985	1
																						2012_06_06 Slide322 F985 aSMA_gH2AX 60x Scar 1 arrows	F985		1
																						2012_06_06 Slide322 F985 aSMA_gH2AX 60x Scar 1 arrows	F985		3
																						2012_06_06 Slide322 F985 aSMA_gH2AX 60x Scar 1 arrows	F985		2
																						2012_06_06 Slide322 F985 aSMA_gH2AX 60x Scar 1 arrows	F985	2	4
																						2012_06_06 Slide322 F985 aSMA_gH2AX 60x Scar 1 arrows	F985	5	6
																						2012_06_06 Slide322 F985 aSMA_gH2AX 60x Scar 1 arrows	F985	2	3
																						2012_06_06 Slide322 F985 aSMA_gH2AX 60x Scar 2 arrows	F985		3
																						2012_06_06 Slide322 F985 aSMA_gH2AX 60x Scar 2 arrows	F985		2
																						2012_06_06 Slide322 F985 aSMA_gH2AX 60x Scar 2 arrows	F985		1
																						2012_06_06 Slide322 F985 aSMA_gH2AX 60x Scar 2 arrows	F985		3
																						2012_06_06 Slide322 F985 aSMA_gH2AX 60x Scar 2 arrows	F985		2
																						2012_06_06 Slide322 F985 aSMA_gH2AX 60x Scar 2 arrows	F985		1
																						2012_06_06 Slide322 F985 aSMA_gH2AX 60x Scar 2 arrows	F985	3	1
																						2012_06_06 Slide322 F985 aSMA_gH2AX 60x Scar 2 arrows	F985	1	1
																						2012_06_06 Slide322 F985 aSMA_gH2AX 60x Scar 2 arrows	F985	1	1
																						2012_06_06 Slide322 F985 aSMA_gH2AX 60x Scar 2 arrows	F985	2	3
																						2012_06_06 Slide322 F985 aSMA_gH2AX 60x Scar 2 arrows	F985		2
																						2012_06_06 Slide322 F985 aSMA_gH2AX 60x Scar 2 arrows	F985		2
																						2012_06_06 Slide322 F985 aSMA_gH2AX 60x Scar 2 arrows	F985	1	1
																						2012_06_06 Slide322 F985 aSMA_gH2AX 60x Scar 2 arrows	F985	1	1
																						2012_06_06 Slide322 F985 aSMA_gH2AX 60x Scar 2 arrows	F985	1	2
																						2012_06_06 Slide322 F985 aSMA_gH2AX 60x Scar 3 arrows	F985		3
																						2012_06_06 Slide322 F985 aSMA_gH2AX 60x Scar 3 arrows	F985	4	4
																						2012_06_06 Slide322 F985 aSMA_gH2AX 60x Scar 3 arrows	F985	4	3
																						2012_06_06 Slide322 F985 aSMA_gH2AX 60x Scar 3 arrows	F985	2	3
																						2012_06_06 Slide322 F985 aSMA_gH2AX 60x Scar 3 arrows	F985	1	3
																						2012_06_06 Slide322 F985 aSMA_gH2AX 60x Scar 3 arrows	F985	1	1
																						2012_06_06 Slide322 F985 aSMA_gH2AX 60x Scar 3 arrows	F985	4	4
																						2012_06_06 Slide322 F985 aSMA_gH2AX 60x Scar 4 arrows	F985	2
																						2012_06_06 Slide322 F985 aSMA_gH2AX 60x Scar 4 arrows	F985	3
																						2012_06_06 Slide322 F985 aSMA_gH2AX 60x Scar 4 arrows	F985	1
																						2012_06_06 Slide322 F985 aSMA_gH2AX 60x Scar 4 arrows	F985	3
																						2012_06_06 Slide322 F985 aSMA_gH2AX 60x Scar 4 arrows	F985	3
																						2012_06_06 Slide322 F985 aSMA_gH2AX 60x Scar 4 arrows	F985	2
																						2012_06_06 Slide322 F985 aSMA_gH2AX 60x Scar 4 arrows	F985	3	4
																						2012_06_06 Slide322 F985 aSMA_gH2AX 60x Scar 4 arrows	F985	1
																						2012_06_06 Slide322 F985 aSMA_gH2AX 60x Scar 4 arrows	F985	2
																						2012_06_06 Slide322 F985 aSMA_gH2AX 60x Scar 4 arrows	F985	3
																						2012_06_06 Slide322 F985 aSMA_gH2AX 60x Scar 4 arrows	F985	2
																						2012_06_06 Slide322 F985 aSMA_gH2AX 60x Scar 5 arrows	F985	4	3
																						2012_06_06 Slide322 F985 aSMA_gH2AX 60x Scar 5 arrows	F985	4
																						2012_06_06 Slide322 F985 aSMA_gH2AX 60x Scar 5 arrows	F985	4
																						2012_06_06 Slide322 F985 aSMA_gH2AX 60x Scar 5 arrows	F985	3
																						2012_06_06 Slide322 F985 aSMA_gH2AX 60x Scar 5 arrows	F985	2
																						2012_06_06 Slide322 F985 aSMA_gH2AX 60x Scar 5 arrows	F985	2	1
																						2012_06_06 Slide322 F985 aSMA_gH2AX 60x Scar 5 arrows	F985	4	3
																						2012_06_06 Slide322 F985 aSMA_gH2AX 60x Scar 5 arrows	F985		4
																						2012_06_06 Slide322 F985 aSMA_gH2AX 60x Scar 5 arrows	F985		3
																						2012_06_06 Slide322 F985 aSMA_gH2AX 60x Scar 5 arrows	F985		1
																						2012_06_06 Slide322 F985 aSMA_gH2AX 60x Scar 5 arrows	F985		1
																						2012_06_06 Slide322 F985 aSMA_gH2AX 60x Scar 5 arrows	F985		2
																						2012_06_06 Slide322 F985 aSMA_gH2AX 60x Scar 5 arrows	F985		3
																						2012_06_06 Slide322 F985 aSMA_gH2AX 60x Scar 5 arrows	F985		1
																						2012_06_06 Slide322 F985 aSMA_gH2AX 60x Scar 5 arrows	F985		2
																						2012_06_06 Slide322 F985 aSMA_gH2AX 60x Scar 5 arrows	F985		4

## Sheet: Panel E and G
								>2 foci	>2 foci	≤2 foci	≤2 foci
						Non-myocyte	Non-myocyte	Non-myocyte	Non-myocyte	Non-myocyte	Non-myocyte
Filename	Rabbit ID	Age Group	Weeks post-MI	Zone	Replicate	CD31- gH2AX-	CD31+ gH2AX-	CD31- gH2AX+	CD31+ gH2AX+	CD31- gH2AX+	CD31+ gH2AX+	# gH2AX+	# CD31+	# gH2AX+ CD31+	Total # Nuclei	% gH2AX+	% CD31+	% of gH2AX+ that are CD31+				Filename	Rabbit ID	# gH2AX foci CD31- Non-myocyte	# gH2AX foci CD31+ Non-myocyte
2021_04_22 SlideX Rabbit 554 CD31_gH2AX 60x Scar 1 arrows	554	Aged	1	Scar	1	45	2	4	0	5	1	4	3	0	57	7.01754	5.26316	0				2020_12_16 Slide265 R126 CD31_gH2AX 60x Scar 1 arrows	R126	3
2021_04_22 SlideX Rabbit 554 CD31_gH2AX 60x Scar 2 arrows	554	Aged	1	Scar	2	83	8	4	1	11	0	5	9	1	107	4.6729	8.41121	20				2020_12_16 Slide265 R126 CD31_gH2AX 60x Scar 1 arrows	R126	2	1
2021_04_22 SlideX Rabbit 554 CD31_gH2AX 60x Scar 3 arrows	554	Aged	1	Scar	3	52	4	4	1	4	1	5	6	1	66	7.57576	9.09091	20				2020_12_16 Slide265 R126 CD31_gH2AX 60x Scar 1 arrows	R126	2
2021_04_22 SlideX Rabbit 554 CD31_gH2AX 60x Scar 4 arrows	554	Aged	1	Scar	4	78	4	3	1	10	0	4	5	1	96	4.16667	5.20833	25				2020_12_16 Slide265 R126 CD31_gH2AX 60x Scar 2 arrows	R126	1	1
2021_04_22 SlideX Rabbit 554 CD31_gH2AX 60x Scar 5 arrows	554	Aged	1	Scar	5	34	6	2	0	8	0	2	6	0	50	4	12	0				2020_12_16 Slide265 R126 CD31_gH2AX 60x Scar 2 arrows	R126	2
2021_01_04 Slide310 F981 CD31_gH2AX 60x Scar 1 arrows	F981	Aged	1	Scar	1	59	35	0	0	0	0	0	35	0	94	0	37.234	#DIV/0!				2020_12_16 Slide265 R126 CD31_gH2AX 60x Scar 3 arrows	R126	3
2021_01_04 Slide310 F981 CD31_gH2AX 60x Scar 2 arows	F981	Aged	1	Scar	2	88	27	0	0	0	0	0	27	0	115	0	23.4783	#DIV/0!				2020_12_16 Slide265 R126 CD31_gH2AX 60x Scar 3 arrows	R126	2
2021_01_04 Slide310 F981 CD31_gH2AX 60x Scar 3 arrows	F981	Aged	1	Scar	3	78	28	0	0	0	0	0	28	0	106	0	26.4151	#DIV/0!				2020_12_16 Slide265 R126 CD31_gH2AX 60x Scar 3 arrows	R126	1
2021_01_04 Slide310 F981 CD31_gH2AX 60x Scar 4 arrows	F981	Aged	1	Scar	4	94	53	0	0	0	0	0	53	0	147	0	36.0544	#DIV/0!				2020_12_16 Slide265 R126 CD31_gH2AX 60x Scar 4 arrows	R126	1	3
2021_01_04 Slide310 F981 CD31_gH2AX 60x Scar 5 arrows	F981	Aged	1	Scar	5	83	39	0	0	0	0	0	39	0	122	0	31.9672	#DIV/0!				2020_12_16 Slide265 R126 CD31_gH2AX 60x Scar 5 arrows	R126	1
2021_01_05 Slide307 5001 CD31_gH2AX 60x Scar 1 arrows	5001	Young	1	Scar	1	95	38	3	0	9	0	3	38	0	145	2.06897	26.2069	0				2020_12_16 Slide265 R126 CD31_gH2AX 60x Scar 5 arrows	R126	1
2021_01_05 Slide307 5001 CD31_gH2AX 60x Scar 2 arrows	5001	Young	1	Scar	2	70	39	2	0	2	1	2	40	0	114	1.75439	35.0877	0				2020_12_16 Slide265 R126 CD31_gH2AX 60x Scar 5 arrows	R126	3
2021_01_05 Slide307 5001 CD31_gH2AX 60x Scar 3 arrows	5001	Young	1	Scar	3	34	62	3	0	3	1	3	63	0	103	2.91262	61.165	0				2020_12_16 Slide265 R126 CD31_gH2AX 60x Scar 5 arrows	R126	1
2021_01_05 Slide307 5001 CD31_gH2AX 60x Scar 4 arrowss	5001	Young	1	Scar	4	67	28	4	0	8	4	4	32	0	111	3.6036	28.8288	0				2020_12_16 Slide265 R126 CD31_gH2AX 60x Scar 5 arrows	R126	2	3
2021_01_05 Slide307 5001 CD31_gH2AX 60x Scar 5 arrows	5001	Young	1	Scar	5	103	10	4	1	12	0	5	11	1	130	3.84615	8.46154	20				2020_12_16 Slide266 R4304 CD31_gH2AX 60x Scar 1 arrows	R4304	3
2021_01_05 Slide309 C567 CD31_gH2AX 60x Scar 1 arr	C567	Young	1	Scar	1	60	55	0	1	1	6	1	62	1	123	0.813008	50.4065	100				2020_12_16 Slide266 R4304 CD31_gH2AX 60x Scar 1 arrows	R4304	1
2021_01_05 Slide309 C567 CD31_gH2AX 60x Scar 2 arr	C567	Young	1	Scar	2	69	42	2	0	3	1	2	43	0	117	1.7094	36.7521	0				2020_12_16 Slide266 R4304 CD31_gH2AX 60x Scar 1 arrows	R4304	1
2021_01_05 Slide309 C567 CD31_gH2AX 60x Scar 3 arr	C567	Young	1	Scar	3	68	17	0	1	2	1	1	19	1	89	1.1236	21.3483	100				2020_12_16 Slide266 R4304 CD31_gH2AX 60x Scar 1 arrows	R4304	1
2021_01_05 Slide309 C567 CD31_gH2AX 60x Scar 4 arr	C567	Young	1	Scar	4	53	6	0	0	3	2	0	8	0	64	0	12.5	#DIV/0!				2020_12_16 Slide266 R4304 CD31_gH2AX 60x Scar 2 arrows	R4304	1
2021_01_05 Slide309 C567 CD31_gH2AX 60x Scar 5 arr	C567	Young	1	Scar	5	65	28	1	0	0	2	1	30	0	96	1.04167	31.25	0				2020_12_16 Slide266 R4304 CD31_gH2AX 60x Scar 3 arrows	R4304	3
2021_01_15 Slide324 D212 CD31_gH2AX 60x Scar 1 arrows	D212	Young	1	Scar	1	76	5	0	0	1	0	0	5	0	82	0	6.09756	#DIV/0!				2020_12_16 Slide266 R4304 CD31_gH2AX 60x Scar 3 arrows	R4304	2
2021_01_15 Slide324 D212 CD31_gH2AX 60x Scar 2 arrows	D212	Young	1	Scar	2	156	13	4	0	7	0	4	13	0	180	2.22222	7.22222	0				2020_12_16 Slide266 R4304 CD31_gH2AX 60x Scar 4 arrows	R4304	1	1
2021_01_15 Slide324 D212 CD31_gH2AX 60x Scar 3 arrows	D212	Young	1	Scar	3	131	27	2	0	1	0	2	27	0	161	1.24224	16.7702	0				2020_12_16 Slide266 R4304 CD31_gH2AX 60x Scar 4 arrows	R4304	1
2021_01_15 Slide324 D212 CD31_gH2AX 60x Scar 4 arrows	D212	Young	1	Scar	4	98	18	1	0	15	1	1	19	0	133	0.75188	14.2857	0				2020_12_16 Slide266 R4304 CD31_gH2AX 60x Scar 5 arrows	R4304	1
2021_01_15 Slide324 D212 CD31_gH2AX 60x Scar 5 arrows	D212	Young	1	Scar	5	84	19	2	0	1	0	2	19	0	106	1.88679	17.9245	0				2020_12_16 Slide267 X227 CD31_gH2AX 60x Scar 1 arows	X227	3
2021_01_05 Slide308 D216 CD31_gH2AX 60x Scar 1 arrows	D216	Young	1	Scar	1	97	16	0	0	7	0	0	16	0	120	0	13.3333	#DIV/0!				2020_12_16 Slide267 X227 CD31_gH2AX 60x Scar 1 arows	X227	1
2021_01_05 Slide308 D216 CD31_gH2AX 60x Scar 2 arrows	D216	Young	1	Scar	2	94	16	1	0	1	0	1	16	0	112	0.892857	14.2857	0				2020_12_16 Slide267 X227 CD31_gH2AX 60x Scar 1 arows	X227	3
2021_01_05 Slide308 D216 CD31_gH2AX 60x Scar 3 arrow	D216	Young	1	Scar	3	99	38	1	0	6	0	1	38	0	144	0.694444	26.3889	0				2020_12_16 Slide267 X227 CD31_gH2AX 60x Scar 1 arows	X227	1
2021_01_05 Slide308 D216 CD31_gH2AX 60x Scar 4 arrows	D216	Young	1	Scar	4	65	19	1	1	4	1	2	21	1	91	2.1978	23.0769	50				2020_12_16 Slide267 X227 CD31_gH2AX 60x Scar 1 arows	X227	2
2021_01_05 Slide308 D216 CD31_gH2AX 60x Scar 5 ar	D216	Young	1	Scar	5	90	44	0	1	1	4	1	49	1	140	0.714286	35	100				2020_12_16 Slide267 X227 CD31_gH2AX 60x Scar 1 arows	X227	1
2021_01_15 Slide326 F184 CD31_gH2AX 60x Scar 1 arrows	F184	Aged	2	Scar	1	72	3	0	0	2	1	0	4	0	78	0	5.12821	#DIV/0!				2020_12_16 Slide267 X227 CD31_gH2AX 60x Scar 1 arows	X227	3
2021_01_15 Slide326 F184 CD31_gH2AX 60x Scar 2 arrows	F184	Aged	2	Scar	2	74	7	0	0	1	0	0	7	0	82	0	8.53659	#DIV/0!				2020_12_16 Slide267 X227 CD31_gH2AX 60x Scar 1 arows	X227	1
2021_01_15 Slide326 F184 CD31_gH2AX 60x Scar 3 arrows	F184	Aged	2	Scar	3	73	0	1	0	0	0	1	0	0	74	1.35135	0	0				2020_12_16 Slide267 X227 CD31_gH2AX 60x Scar 1 arows	X227	1
2021_01_15 Slide326 F184 CD31_gH2AX 60x Scar 4 arrows	F184	Aged	2	Scar	4	60	10	1	2	0	0	3	12	2	73	4.10959	16.4384	66.6667				2020_12_16 Slide267 X227 CD31_gH2AX 60x Scar 1 arows	X227	2
2021_01_15 Slide326 F184 CD31_gH2AX 60x Scar 5 arrows	F184	Aged	2	Scar	5	45	0	0	0	1	0	0	0	0	46	0	0	#DIV/0!				2020_12_16 Slide267 X227 CD31_gH2AX 60x Scar 2 arrows	X227	1	2
2021_01_04 Slide314 F322 CD31_gH2AX 20x Scar 1 arrows	F322	Aged	2	Scar	1	53	11	3	0	3	0	3	11	0	70	4.28571	15.7143	0				2020_12_16 Slide267 X227 CD31_gH2AX 60x Scar 2 arrows	X227	2
2021_01_04 Slide314 F322 CD31_gH2AX 20x Scar 2 arrows	F322	Aged	2	Scar	2	67	19	1	1	10	4	2	24	1	102	1.96078	23.5294	50				2020_12_16 Slide267 X227 CD31_gH2AX 60x Scar 2 arrows	X227	1
2021_01_04 Slide314 F322 CD31_gH2AX 20x Scar 3 arrows	F322	Aged	2	Scar	3	71	7	4	1	5	1	5	9	1	89	5.61798	10.1124	20				2020_12_16 Slide267 X227 CD31_gH2AX 60x Scar 2 arrows	X227	3
2021_01_04 Slide314 F322 CD31_gH2AX 20x Scar 4 arrows	F322	Aged	2	Scar	4	82	16	1	0	3	1	1	17	0	103	0.970874	16.5049	0				2020_12_16 Slide267 X227 CD31_gH2AX 60x Scar 2 arrows	X227	3
2021_01_04 Slide314 F322 CD31_gH2AX 20x Scar 5 arrows	F322	Aged	2	Scar	5	95	31	1	0	0	2	1	33	0	129	0.775194	25.5814	0				2020_12_16 Slide267 X227 CD31_gH2AX 60x Scar 2 arrows	X227	5
2021_01_05 Slide315 F949 CD31_gH2AX 60x Scar 1 arrows	F949	Aged	2	Scar	1	53	0	4	0	3	0	4	0	0	60	6.66667	0	0				2020_12_16 Slide267 X227 CD31_gH2AX 60x Scar 2 arrows	X227	3
2021_01_05 Slide315 F949 CD31_gH2AX 60x Scar 2 arrows	F949	Aged	2	Scar	2	114	0	1	0	6	0	1	0	0	121	0.826446	0	0				2020_12_16 Slide267 X227 CD31_gH2AX 60x Scar 3 arrows	X227	1
2021_01_05 Slide315 F949 CD31_gH2AX 60x Scar 3 arrows	F949	Aged	2	Scar	3	72	0	1	0	3	0	1	0	0	76	1.31579	0	0				2020_12_16 Slide267 X227 CD31_gH2AX 60x Scar 3 arrows	X227	3
2021_01_05 Slide315 F949 CD31_gH2AX 60x Scar 4 arrows	F949	Aged	2	Scar	4	54	18	0	0	2	1	0	19	0	75	0	25.3333	#DIV/0!				2020_12_16 Slide267 X227 CD31_gH2AX 60x Scar 3 arrows	X227	1
2021_01_05 Slide315 F949 CD31_gH2AX 60x Scar 5 arrows	F949	Aged	2	Scar	5	76	3	0	0	8	0	0	3	0	87	0	3.44828	#DIV/0!				2020_12_16 Slide267 X227 CD31_gH2AX 60x Scar 3 arrows	X227	1
2021_01_04 Slide316 H962 CD31_gH2AX 60x Scar 1 arrows	H962	Aged	2	Scar	1	58	15	0	0	0	0	0	15	0	73	0	20.5479	#DIV/0!				2020_12_16 Slide267 X227 CD31_gH2AX 60x Scar 3 arrows	X227	3
2021_01_04 Slide316 H962 CD31_gH2AX 60x Scar 2 arrows	H962	Aged	2	Scar	2	66	12	10	3	4	0	13	15	3	95	13.6842	15.7895	23.0769				2020_12_16 Slide267 X227 CD31_gH2AX 60x Scar 3 arrows	X227	3
2021_01_04 Slide316 H962 CD31_gH2AX 60x Scar 3 arrows	H962	Aged	2	Scar	3	51	8	5	1	5	1	6	10	1	71	8.4507	14.0845	16.6667				2020_12_16 Slide267 X227 CD31_gH2AX 60x Scar 3 arrows	X227	3
2021_01_04 Slide316 H962 CD31_gH2AX 60x Scar 4 arrows	H962	Aged	2	Scar	4	53	16	7	1	3	0	8	17	1	80	10	21.25	12.5				2020_12_16 Slide267 X227 CD31_gH2AX 60x Scar 4 arrows	X227	2
2021_01_04 Slide316 H962 CD31_gH2AX 60x Scar 5 arrows	H962	Aged	2	Scar	5	60	14	2	0	7	0	2	14	0	83	2.40964	16.8675	0				2020_12_16 Slide267 X227 CD31_gH2AX 60x Scar 4 arrows	X227	2
2021_01_04 Slide312 5043 CD31_gH2AX 60x Scar 1 arrows	5043	Young	2	Scar	1	97	26	7	2	22	3	9	31	2	157	5.73248	19.7452	22.2222				2020_12_16 Slide267 X227 CD31_gH2AX 60x Scar 4 arrows	X227	2
2021_01_04 Slide312 5043 CD31_gH2AX 60x Scar 2 arrows	5043	Young	2	Scar	2	62	9	3	0	8	0	3	9	0	82	3.65854	10.9756	0				2020_12_16 Slide267 X227 CD31_gH2AX 60x Scar 4 arrows	X227	2
2021_01_04 Slide312 5043 CD31_gH2AX 60x Scar 3 arrows	5043	Young	2	Scar	3	93	21	2	0	13	1	2	22	0	130	1.53846	16.9231	0				2020_12_16 Slide267 X227 CD31_gH2AX 60x Scar 5 arrows	X227	2
2021_01_04 Slide312 5043 CD31_gH2AX 60x Scar 4 arrows	5043	Young	2	Scar	4	101	16	4	0	8	5	4	21	0	134	2.98507	15.6716	0				2020_12_16 Slide267 X227 CD31_gH2AX 60x Scar 5 arrows	X227	3
2021_01_04 Slide312 5043 CD31_gH2AX 60x Scar 5 arrows	5043	Young	2	Scar	5	137	16	4	0	8	0	4	16	0	165	2.42424	9.69697	0				2020_12_16 Slide267 X227 CD31_gH2AX 60x Scar 5 arrows	X227	3
2021_01_05 Slide313 X161 CD31_gH2AX 60x Scar 2-MaxIP arows	X161	Young	2	Scar	2	90	9	8	0	26	5	8	14	0	138	5.7971	10.1449	0				2020_12_16 Slide267 X227 CD31_gH2AX 60x Scar 5 arrows	X227	2
2021_01_05 Slide313 X161 CD31_gH2AX 60x Scar 3-MaxIP arrows	X161	Young	2	Scar	3	106	16	2	0	16	2	2	18	0	142	1.40845	12.6761	0				2020_12_16 Slide267 X227 CD31_gH2AX 60x Scar 5 arrows	X227	1
2021_01_05 Slide313 X161 CD31_gH2AX 60x Scar 4-MaxIP arrows	X161	Young	2	Scar	4	64	11	8	0	19	0	8	11	0	102	7.84314	10.7843	0				2020_12_16 Slide268 3890 CD31_gH2AX 60x Scar 1 arrows	3890	2
2021_01_05 Slide313 X161 CD31_gH2AX 60x Scar 5-MaxIP arows	X161	Young	2	Scar	5	71	22	1	0	8	3	1	25	0	105	0.952381	23.8095	0				2020_12_16 Slide268 3890 CD31_gH2AX 60x Scar 1 arrows	3890	1	2
2021_01_04 Slide311 X245 CD31_gH2AX 60x Scar 1 arrows	X245	Young	2	Scar	1	50	41	1	0	5	2	1	43	0	99	1.0101	43.4343	0				2020_12_16 Slide268 3890 CD31_gH2AX 60x Scar 1 arrows	3890	1
2021_01_04 Slide311 X245 CD31_gH2AX 60x Scar 2 arrows	X245	Young	2	Scar	2	59	27	0	0	7	2	0	29	0	95	0	30.5263	#DIV/0!				2020_12_16 Slide268 3890 CD31_gH2AX 60x Scar 1 arrows	3890	4
2021_01_04 Slide311 X245 CD31_gH2AX 60x Scar 3 arrows	X245	Young	2	Scar	3	54	22	0	0	5	1	0	23	0	82	0	28.0488	#DIV/0!				2020_12_16 Slide268 3890 CD31_gH2AX 60x Scar 1 arrows	3890	1
2021_01_04 Slide311 X245 CD31_gH2AX 60x Scar 4 arrows	X245	Young	2	Scar	4	60	15	2	0	6	0	2	15	0	83	2.40964	18.0723	0				2020_12_16 Slide268 3890 CD31_gH2AX 60x Scar 2 arrows	3890	2	1
2021_01_04 Slide311 X245 CD31_gH2AX 60x Scar 5 arrows	X245	Young	2	Scar	5	80	40	2	0	4	0	2	40	0	126	1.5873	31.746	0				2020_12_16 Slide268 3890 CD31_gH2AX 60x Scar 2 arrows	3890	1	1
2021_01_15 Slide325 X247 CD31_gH2AX 60x Scar 1 arrows	X247	Young	2	Scar	1	101	0	2	0	3	0	2	0	0	106	1.88679	0	0				2020_12_16 Slide268 3890 CD31_gH2AX 60x Scar 2 arrows	3890	1	1
2021_01_15 Slide325 X247 CD31_gH2AX 60x Scar 2 arrows	X247	Young	2	Scar	2	58	0	0	0	1	0	0	0	0	59	0	0	#DIV/0!				2020_12_16 Slide268 3890 CD31_gH2AX 60x Scar 2 arrows	3890	1
2021_01_15 Slide325 X247 CD31_gH2AX 60x Scar 3 arrows	X247	Young	2	Scar	3	65	0	1	0	3	0	1	0	0	69	1.44928	0	0				2020_12_16 Slide268 3890 CD31_gH2AX 60x Scar 2 arrows	3890	1
2021_01_15 Slide325 X247 CD31_gH2AX 60x Scar 4 arrows	X247	Young	2	Scar	4	49	7	0	0	2	0	0	7	0	58	0	12.069	#DIV/0!				2020_12_16 Slide268 3890 CD31_gH2AX 60x Scar 2 arrows	3890	1
2021_01_15 Slide325 X247 CD31_gH2AX 60x Scar 5 arrows	X247	Young	2	Scar	5	59	10	2	0	2	0	2	10	0	73	2.73973	13.6986	0				2020_12_16 Slide268 3890 CD31_gH2AX 60x Scar 2 arrows	3890	1
2020_12_16 Slide265 R126 CD31_gH2AX 60x Scar 1 arrows	R126	Aged	3	Scar	1	110	15	1	0	2	1	1	16	0	129	0.775194	12.4031	0				2020_12_16 Slide268 3890 CD31_gH2AX 60x Scar 3 arrows	3890	1
2020_12_16 Slide265 R126 CD31_gH2AX 60x Scar 2 arrows	R126	Aged	3	Scar	2	104	16	0	0	2	1	0	17	0	123	0	13.8211	#DIV/0!				2020_12_16 Slide268 3890 CD31_gH2AX 60x Scar 3 arrows	3890	1
2020_12_16 Slide265 R126 CD31_gH2AX 60x Scar 3 arrows	R126	Aged	3	Scar	3	121	2	1	0	2	0	1	2	0	126	0.793651	1.5873	0				2020_12_16 Slide268 3890 CD31_gH2AX 60x Scar 3 arrows	3890	2
2020_12_16 Slide265 R126 CD31_gH2AX 60x Scar 4 arrows	R126	Aged	3	Scar	4	92	23	0	1	1	0	1	24	1	117	0.854701	20.5128	100				2020_12_16 Slide268 3890 CD31_gH2AX 60x Scar 3 arrows	3890	3
2020_12_16 Slide265 R126 CD31_gH2AX 60x Scar 5 arrows	R126	Aged	3	Scar	5	97	33	1	1	4	0	2	34	1	136	1.47059	25	50				2020_12_16 Slide268 3890 CD31_gH2AX 60x Scar 3 arrows	3890	2
2020_12_16 Slide266 R4304 CD31_gH2AX 60x Scar 1 arrows	R4304	Aged	3	Scar	1	118	4	1	0	3	0	1	4	0	126	0.793651	3.1746	0				2020_12_16 Slide268 3890 CD31_gH2AX 60x Scar 3 arrows	3890	1
2020_12_16 Slide266 R4304 CD31_gH2AX 60x Scar 2 arrows	R4304	Aged	3	Scar	2	66	11	0	0	1	0	0	11	0	78	0	14.1026	#DIV/0!				2020_12_16 Slide268 3890 CD31_gH2AX 60x Scar 3 arrows	3890	3
2020_12_16 Slide266 R4304 CD31_gH2AX 60x Scar 3 arrows	R4304	Aged	3	Scar	3	93	4	1	0	1	0	1	4	0	99	1.0101	4.0404	0				2020_12_16 Slide268 3890 CD31_gH2AX 60x Scar 4 arrows	3890	1	1
2020_12_16 Slide266 R4304 CD31_gH2AX 60x Scar 4 arrows	R4304	Aged	3	Scar	4	77	51	0	0	2	1	0	52	0	131	0	39.6947	#DIV/0!				2020_12_16 Slide268 3890 CD31_gH2AX 60x Scar 4 arrows	3890	1	1
2020_12_16 Slide266 R4304 CD31_gH2AX 60x Scar 5 arrows	R4304	Aged	3	Scar	5	80	22	0	0	1	0	0	22	0	103	0	21.3592	#DIV/0!				2020_12_16 Slide268 3890 CD31_gH2AX 60x Scar 4 arrows	3890	2
2020_12_24 Slide271 X181 CD31_gH2AX 60x Scar 1 arrows	X181	Aged	3	Scar	1	59	0	0	0	1	0	0	0	0	60	0	0	#DIV/0!				2020_12_16 Slide268 3890 CD31_gH2AX 60x Scar 5 arorws	3890	1	1
2020_12_24 Slide271 X181 CD31_gH2AX 60x Scar 2 arrows	X181	Aged	3	Scar	2	82	4	0	0	3	0	0	4	0	89	0	4.49438	#DIV/0!				2020_12_16 Slide268 3890 CD31_gH2AX 60x Scar 5 arorws	3890	1	2
2020_12_24 Slide271 X181 CD31_gH2AX 60x Scar 3 arrows	X181	Aged	3	Scar	3	70	9	0	0	1	0	0	9	0	80	0	11.25	#DIV/0!				2020_12_16 Slide268 3890 CD31_gH2AX 60x Scar 5 arorws	3890	1	2
2020_12_24 Slide271 X181 CD31_gH2AX 60x Scar 4 arrows	X181	Aged	3	Scar	4	66	1	0	0	0	0	0	1	0	67	0	1.49254	#DIV/0!				2020_12_16 Slide268 3890 CD31_gH2AX 60x Scar 5 arorws	3890	1	1
2020_12_24 Slide271 X181 CD31_gH2AX 60x Scar 5 arrows	X181	Aged	3	Scar	5	70	10	0	0	3	0	0	10	0	83	0	12.0482	#DIV/0!				2020_12_16 Slide268 3890 CD31_gH2AX 60x Scar 5 arorws	3890	2
2020_12_16 Slide267 X227 CD31_gH2AX 60x Scar 1 arows	X227	Aged	3	Scar	1	75	10	3	0	7	0	3	10	0	95	3.15789	10.5263	0				2020_12_16 Slide268 3890 CD31_gH2AX 60x Scar 5 arorws	3890	1
2020_12_16 Slide267 X227 CD31_gH2AX 60x Scar 2 arrows	X227	Aged	3	Scar	2	34	11	4	0	3	1	4	12	0	53	7.54717	22.6415	0				2020_12_16 Slide268 3890 CD31_gH2AX 60x Scar 5 arorws	3890	1
2020_12_16 Slide267 X227 CD31_gH2AX 60x Scar 3 arrows	X227	Aged	3	Scar	3	49	14	4	0	3	0	4	14	0	70	5.71429	20	0				2020_12_16 Slide268 3890 CD31_gH2AX 60x Scar 5 arorws	3890	1
2020_12_16 Slide267 X227 CD31_gH2AX 60x Scar 4 arrows	X227	Aged	3	Scar	4	61	9	0	0	4	0	0	9	0	74	0	12.1622	#DIV/0!				2020_12_16 Slide268 3890 CD31_gH2AX 60x Scar 5 arorws	3890	1
2020_12_16 Slide267 X227 CD31_gH2AX 60x Scar 5 arrows	X227	Aged	3	Scar	5	41	18	2	0	3	0	2	18	0	64	3.125	28.125	0				2020_12_16 Slide269 X228 CD31_gH2AX 60x Scar 1 arrows	X228	2
2020_12_16 Slide268 3890 CD31_gH2AX 60x Scar 1 arrows	3890	Young	3	Scar	1	116	41	1	0	4	1	1	42	0	163	0.613497	25.7669	0				2020_12_16 Slide269 X228 CD31_gH2AX 60x Scar 1 arrows	X228	1
2020_12_16 Slide268 3890 CD31_gH2AX 60x Scar 2 arrows	3890	Young	3	Scar	2	117	53	0	0	7	3	0	56	0	180	0	31.1111	#DIV/0!				2020_12_16 Slide269 X228 CD31_gH2AX 60x Scar 1 arrows	X228	1
2020_12_16 Slide268 3890 CD31_gH2AX 60x Scar 3 arrows	3890	Young	3	Scar	3	116	29	2	0	5	0	2	29	0	152	1.31579	19.0789	0				2020_12_16 Slide269 X228 CD31_gH2AX 60x Scar 1 arrows	X228	1
2020_12_16 Slide268 3890 CD31_gH2AX 60x Scar 4 arrows	3890	Young	3	Scar	4	166	38	0	0	3	2	0	40	0	209	0	19.1388	#DIV/0!				2020_12_16 Slide269 X228 CD31_gH2AX 60x Scar 1 arrows	X228	1
2020_12_16 Slide268 3890 CD31_gH2AX 60x Scar 5 arorws	3890	Young	3	Scar	5	117	42	0	0	9	4	0	46	0	172	0	26.7442	#DIV/0!				2020_12_16 Slide269 X228 CD31_gH2AX 60x Scar 1 arrows	X228	2
2020_12_24 Slide272 X220 CD31_gH2AX 60x Scar 1 arrows	X220	Young	3	Scar	1	88	4	0	0	0	0	0	4	0	92	0	4.34783	#DIV/0!				2020_12_16 Slide269 X228 CD31_gH2AX 60x Scar 1 arrows	X228	1
2020_12_24 Slide272 X220 CD31_gH2AX 60x Scar 2 arrows	X220	Young	3	Scar	2	110	0	0	0	1	0	0	0	0	111	0	0	#DIV/0!				2020_12_16 Slide269 X228 CD31_gH2AX 60x Scar 1 arrows	X228	1
2020_12_24 Slide272 X220 CD31_gH2AX 60x Scar 3 arrows	X220	Young	3	Scar	3	81	8	0	0	5	0	0	8	0	94	0	8.51064	#DIV/0!				2020_12_16 Slide269 X228 CD31_gH2AX 60x Scar 1 arrows	X228	4
2020_12_24 Slide272 X220 CD31_gH2AX 60x Scar 4 arrows	X220	Young	3	Scar	4	51	18	0	0	0	0	0	18	0	69	0	26.087	#DIV/0!				2020_12_16 Slide269 X228 CD31_gH2AX 60x Scar 1 arrows	X228	2
2020_12_24 Slide272 X220 CD31_gH2AX 60x Scar 5 arrows	X220	Young	3	Scar	5	46	13	0	0	4	0	0	13	0	63	0	20.6349	#DIV/0!				2020_12_16 Slide269 X228 CD31_gH2AX 60x Scar 1 arrows	X228	1
2020_12_16 Slide269 X228 CD31_gH2AX 60x Scar 1 arrows	X228	Young	3	Scar	1	97	0	1	0	10	0	1	0	0	108	0.925926	0	0				2020_12_16 Slide269 X228 CD31_gH2AX 60x Scar 2 arrows	X228	2
2020_12_16 Slide269 X228 CD31_gH2AX 60x Scar 2 arrows	X228	Young	3	Scar	2	90	9	0	0	3	1	0	10	0	103	0	9.70874	#DIV/0!				2020_12_16 Slide269 X228 CD31_gH2AX 60x Scar 2 arrows	X228	1	1
2020_12_16 Slide269 X228 CD31_gH2AX 60x Scar 3 arrows	X228	Young	3	Scar	3	87	0	0	0	3	0	0	0	0	90	0	0	#DIV/0!				2020_12_16 Slide269 X228 CD31_gH2AX 60x Scar 2 arrows	X228	1
2020_12_16 Slide269 X228 CD31_gH2AX 60x Scar 4 arrows	X228	Young	3	Scar	4	103	49	1	0	2	0	1	49	0	155	0.645161	31.6129	0				2020_12_16 Slide269 X228 CD31_gH2AX 60x Scar 3 arrows	X228	1
2020_12_16 Slide269 X228 CD31_gH2AX 60x Scar 5 arrows	X228	Young	3	Scar	5	96	20	0	0	2	0	0	20	0	118	0	16.9492	#DIV/0!				2020_12_16 Slide269 X228 CD31_gH2AX 60x Scar 3 arrows	X228	1
2020_12_25 Slide270 X230 CD31_gH2AX 60x Scar 1 arrows	X230	Young	3	Scar	1	41	23	0	0	4	1	0	24	0	69	0	34.7826	#DIV/0!				2020_12_16 Slide269 X228 CD31_gH2AX 60x Scar 3 arrows	X228	1
2020_12_25 Slide270 X230 CD31_gH2AX 60x Scar 2 arrows	X230	Young	3	Scar	2	78	42	0	1	5	4	1	47	1	130	0.769231	36.1538	100				2020_12_16 Slide269 X228 CD31_gH2AX 60x Scar 4 arrows	X228	6
2020_12_25 Slide270 X230 CD31_gH2AX 60x Scar 3 arrows	X230	Young	3	Scar	3	102	31	1	0	2	4	1	35	0	140	0.714286	25	0				2020_12_16 Slide269 X228 CD31_gH2AX 60x Scar 4 arrows	X228	1
2020_12_25 Slide270 X230 CD31_gH2AX 60x Scar 4 arrows	X230	Young	3	Scar	4	46	17	0	0	2	1	0	18	0	66	0	27.2727	#DIV/0!				2020_12_16 Slide269 X228 CD31_gH2AX 60x Scar 4 arrows	X228	2
2020_12_25 Slide270 X230 CD31_gH2AX 60x Scar 5 arrows	X230	Young	3	Scar	5	97	51	0	0	2	3	0	54	0	153	0	35.2941	#DIV/0!				2020_12_16 Slide269 X228 CD31_gH2AX 60x Scar 5 arrows	X228	2
2020_12_26 Slide288 B1149 CD31_gH2AX 60x Scar 1 arrows	B1149	Aged	12	Scar	1	65	8	2	0	2	1	2	9	0	78	2.5641	11.5385	0				2020_12_16 Slide269 X228 CD31_gH2AX 60x Scar 5 arrows	X228	2
2020_12_26 Slide288 B1149 CD31_gH2AX 60x Scar 2 arrows	B1149	Aged	12	Scar	2	79	4	0	0	4	0	0	4	0	87	0	4.5977	#DIV/0!				2020_12_24 Slide271 X181 CD31_gH2AX 60x Scar 1 arrows	X181	1
2020_12_26 Slide288 B1149 CD31_gH2AX 60x Scar 3 arrows	B1149	Aged	12	Scar	3	68	5	1	0	4	1	1	6	0	79	1.26582	7.59494	0				2020_12_24 Slide271 X181 CD31_gH2AX 60x Scar 2 arrows	X181	1
2020_12_26 Slide288 B1149 CD31_gH2AX 60x Scar 4 arrows	B1149	Aged	12	Scar	4	55	1	0	0	2	0	0	1	0	58	0	1.72414	#DIV/0!				2020_12_24 Slide271 X181 CD31_gH2AX 60x Scar 2 arrows	X181	1
2020_12_26 Slide288 B1149 CD31_gH2AX 60x Scar 5 arrows	B1149	Aged	12	Scar	5	49	3	2	0	4	2	2	5	0	60	3.33333	8.33333	0				2020_12_24 Slide271 X181 CD31_gH2AX 60x Scar 2 arrows	X181	1
2020_12_26 Slide289 F894 CD31_gH2AX 60x Scar 1 arrows	F894	Aged	12	Scar	1	79	9	2	0	4	0	2	9	0	94	2.12766	9.57447	0				2020_12_24 Slide271 X181 CD31_gH2AX 60x Scar 3 arrows	X181	1
2020_12_26 Slide289 F894 CD31_gH2AX 60x Scar 2 arrows	F894	Aged	12	Scar	2	60	12	3	0	4	1	3	13	0	80	3.75	16.25	0				2020_12_24 Slide271 X181 CD31_gH2AX 60x Scar 4 arrows	X181
2020_12_26 Slide289 F894 CD31_gH2AX 60x Scar 3 arrows	F894	Aged	12	Scar	3	44	10	1	0	2	1	1	11	0	58	1.72414	18.9655	0				2020_12_24 Slide271 X181 CD31_gH2AX 60x Scar 5 arrows	X181	1
2020_12_26 Slide289 F894 CD31_gH2AX 60x Scar 4 arrows	F894	Aged	12	Scar	4	86	6	0	1	3	0	1	7	1	96	1.04167	7.29167	100				2020_12_24 Slide271 X181 CD31_gH2AX 60x Scar 5 arrows	X181	1
2020_12_26 Slide289 F894 CD31_gH2AX 60x Scar 5 arrows	F894	Aged	12	Scar	5	67	21	1	0	2	0	1	21	0	91	1.0989	23.0769	0				2020_12_24 Slide271 X181 CD31_gH2AX 60x Scar 5 arrows	X181	1
2020_12_26 Slide290 F985 CD31_gH2AX 60x Scar 1 arrows	F985	Aged	12	Scar	1	48	27	5	0	7	0	5	27	0	87	5.74713	31.0345	0				2020_12_24 Slide272 X220 CD31_gH2AX 60x Scar 1 arrows	X220
2020_12_26 Slide290 F985 CD31_gH2AX 60x Scar 2 arrows	F985	Aged	12	Scar	2	28	10	9	1	3	1	10	12	1	52	19.2308	23.0769	10				2020_12_24 Slide272 X220 CD31_gH2AX 60x Scar 2 arrows	X220	1
2020_12_26 Slide290 F985 CD31_gH2AX 60x Scar 3 arrows	F985	Aged	12	Scar	3	19	5	4	0	8	1	4	6	0	37	10.8108	16.2162	0				2020_12_24 Slide272 X220 CD31_gH2AX 60x Scar 3 arrows	X220	2
2020_12_26 Slide290 F985 CD31_gH2AX 60x Scar 4 arrow	F985	Aged	12	Scar	4	27	6	6	1	10	1	7	8	1	51	13.7255	15.6863	14.2857				2020_12_24 Slide272 X220 CD31_gH2AX 60x Scar 3 arrows	X220	2
2020_12_26 Slide290 F985 CD31_gH2AX 60x Scar 5 arrows	F985	Aged	12	Scar	5	41	18	1	0	7	2	1	20	0	69	1.44928	28.9855	0				2020_12_24 Slide272 X220 CD31_gH2AX 60x Scar 3 arrows	X220	1
2020_12_26 Slide287 S1165 CD31_gH2AX 60x Scar 1 arrows	S1165	Aged	12	Scar	1	73	4	0	0	1	0	0	4	0	78	0	5.12821	#DIV/0!				2020_12_24 Slide272 X220 CD31_gH2AX 60x Scar 3 arrows	X220	1
2020_12_26 Slide287 S1165 CD31_gH2AX 60x Scar 2 arrows	S1165	Aged	12	Scar	2	27	11	1	0	1	0	1	11	0	40	2.5	27.5	0				2020_12_24 Slide272 X220 CD31_gH2AX 60x Scar 3 arrows	X220	1
2020_12_26 Slide287 S1165 CD31_gH2AX 60x Scar 3 arrows	S1165	Aged	12	Scar	3	46	14	0	0	1	0	0	14	0	61	0	22.9508	#DIV/0!				2020_12_24 Slide272 X220 CD31_gH2AX 60x Scar 4 arrows	X220
2020_12_26 Slide287 S1165 CD31_gH2AX 60x Scar 4 arrows	S1165	Aged	12	Scar	4	44	0	0	0	2	0	0	0	0	46	0	0	#DIV/0!				2020_12_24 Slide272 X220 CD31_gH2AX 60x Scar 5 arrows	X220	1
2020_12_26 Slide287 S1165 CD31_gH2AX 60x Scar 5 arrows	S1165	Aged	12	Scar	5	33	5	3	0	3	0	3	5	0	44	6.81818	11.3636	0				2020_12_24 Slide272 X220 CD31_gH2AX 60x Scar 5 arrows	X220	1
2020_12_26 Slide292 91442 CD31_gH2AX 60x Scar 1 arrows	91442	Young	12	Scar	1	45	12	0	0	1	1	0	13	0	59	0	22.0339	#DIV/0!				2020_12_24 Slide272 X220 CD31_gH2AX 60x Scar 5 arrows	X220	1
2020_12_26 Slide292 91442 CD31_gH2AX 60x Scar 2 arrows	91442	Young	12	Scar	2	51	10	1	0	1	0	1	10	0	63	1.5873	15.873	0				2020_12_24 Slide272 X220 CD31_gH2AX 60x Scar 5 arrows	X220	1
2020_12_26 Slide292 91442 CD31_gH2AX 60x Scar 3 arrows	91442	Young	12	Scar	3	45	4	0	0	4	0	0	4	0	53	0	7.54717	#DIV/0!				2020_12_25 Slide270 X230 CD31_gH2AX 60x Scar 1 arrows	X230	1
2020_12_26 Slide292 91442 CD31_gH2AX 60x Scar 4 arrows	91442	Young	12	Scar	4	44	2	0	0	3	0	0	2	0	49	0	4.08163	#DIV/0!				2020_12_25 Slide270 X230 CD31_gH2AX 60x Scar 1 arrows	X230	1
2020_12_26 Slide292 91442 CD31_gH2AX 60x Scar 5 arrows	91442	Young	12	Scar	5	49	4	0	0	1	0	0	4	0	54	0	7.40741	#DIV/0!				2020_12_25 Slide270 X230 CD31_gH2AX 60x Scar 1 arrows	X230	1
2020_12_26 Slide294 X203 CD31_gH2AX 60x Scar 1 arrows	X203	Young	12	Scar	1	83	3	0	0	3	1	0	4	0	90	0	4.44444	#DIV/0!				2020_12_25 Slide270 X230 CD31_gH2AX 60x Scar 1 arrows	X230	2	2
2020_12_26 Slide294 X203 CD31_gH2AX 60x Scar 2 arrows	X203	Young	12	Scar	2	47	8	1	0	1	0	1	8	0	57	1.75439	14.0351	0				2020_12_25 Slide270 X230 CD31_gH2AX 60x Scar 2 arrows	X230	1	1
2020_12_26 Slide294 X203 CD31_gH2AX 60x Scar 3 arrows	X203	Young	12	Scar	3	85	8	0	0	2	0	0	8	0	95	0	8.42105	#DIV/0!				2020_12_25 Slide270 X230 CD31_gH2AX 60x Scar 2 arrows	X230	1	1
2020_12_26 Slide294 X203 CD31_gH2AX 60x Scar 4 arrows	X203	Young	12	Scar	4	61	16	0	0	1	0	0	16	0	78	0	20.5128	#DIV/0!				2020_12_25 Slide270 X230 CD31_gH2AX 60x Scar 2 arrows	X230	1	1
2020_12_26 Slide294 X203 CD31_gH2AX 60x Scar 5 arrows	X203	Young	12	Scar	5	64	3	0	0	4	0	0	3	0	71	0	4.22535	#DIV/0!				2020_12_25 Slide270 X230 CD31_gH2AX 60x Scar 2 arrows	X230	1	5
2020_12_26 Slide293 X205 CD31_gH2AX 60x Scar 1 arrows	X205	Young	12	Scar	1	51	11	0	0	3	0	0	11	0	65	0	16.9231	#DIV/0!				2020_12_25 Slide270 X230 CD31_gH2AX 60x Scar 2 arrows	X230	1	1
2020_12_26 Slide293 X205 CD31_gH2AX 60x Scar 2 arrows	X205	Young	12	Scar	2	60	20	0	0	3	0	0	20	0	83	0	24.0964	#DIV/0!				2020_12_25 Slide270 X230 CD31_gH2AX 60x Scar 3 arrows	X230	1	1
2020_12_26 Slide293 X205 CD31_gH2AX 60x Scar 3 arrows	X205	Young	12	Scar	3	59	10	0	0	1	0	0	10	0	70	0	14.2857	#DIV/0!				2020_12_25 Slide270 X230 CD31_gH2AX 60x Scar 3 arrows	X230		1
2020_12_26 Slide293 X205 CD31_gH2AX 60x Scar 4 arrows	X205	Young	12	Scar	4	59	9	0	0	2	2	0	11	0	72	0	15.2778	#DIV/0!				2020_12_25 Slide270 X230 CD31_gH2AX 60x Scar 3 arrows	X230	1	1
2020_12_26 Slide293 X205 CD31_gH2AX 60x Scar 5 arrows	X205	Young	12	Scar	5	68	14	1	0	6	0	1	14	0	89	1.1236	15.7303	0				2020_12_25 Slide270 X230 CD31_gH2AX 60x Scar 3 arrows	X230	5	1
2020_12_26 Slide291 X209 CD31_gH2AX 60x Scar 1 arrows	X209	Young	12	Scar	1	48	13	1	0	2	0	1	13	0	64	1.5625	20.3125	0				2020_12_25 Slide270 X230 CD31_gH2AX 60x Scar 4 arrows	X230	1	1
2020_12_26 Slide291 X209 CD31_gH2AX 60x Scar 2 arrows	X209	Young	12	Scar	2	49	0	0	0	3	0	0	0	0	52	0	0	#DIV/0!				2020_12_25 Slide270 X230 CD31_gH2AX 60x Scar 4 arrows	X230	2
2020_12_26 Slide291 X209 CD31_gH2AX 60x Scar 3 arrows	X209	Young	12	Scar	3	67	7	0	0	3	0	0	7	0	77	0	9.09091	#DIV/0!				2020_12_25 Slide270 X230 CD31_gH2AX 60x Scar 5 arrows	X230		2
2020_12_26 Slide291 X209 CD31_gH2AX 60x Scar 4 arrows	X209	Young	12	Scar	4	43	14	0	0	2	0	0	14	0	59	0	23.7288	#DIV/0!				2020_12_25 Slide270 X230 CD31_gH2AX 60x Scar 5 arrows	X230	1	1
2020_12_26 Slide291 X209 CD31_gH2AX 60x Scar 5 arrows	X209	Young	12	Scar	5	63	10	0	0	3	0	0	10	0	76	0	13.1579	#DIV/0!				2020_12_25 Slide270 X230 CD31_gH2AX 60x Scar 5 arrows	X230	1	2
2021_05_27 Slide392 552 CD31_gH2AX 60x Scar 5 - Deconvolved, Type Automatic	552	Aged	1	Scar	5	56	4	3	0	8	0	3	4	0	71	4.22535	5.6338	0				2020_12_26 Slide287 S1165 CD31_gH2AX 60x Scar 1 arrows	S1165	1
2021_05_27 Slide392 552 CD31_gH2AX 60x Scar 4 - Deconvolved, Type Automatic	552	Aged	1	Scar	4	36	39	0	0	0	0	0	39	0	75	0	52	#DIV/0!				2020_12_26 Slide287 S1165 CD31_gH2AX 60x Scar 2 arrows	S1165	4
2021_05_27 Slide392 552 CD31_gH2AX 60x Scar 3 - Deconvolved, Type Automatic	552	Aged	1	Scar	3	22	55	1	2	4	2	3	59	2	86	3.48837	68.6047	66.6667				2020_12_26 Slide287 S1165 CD31_gH2AX 60x Scar 2 arrows	S1165	1
2021_05_27 Slide392 552 CD31_gH2AX 60x Scar 2 - Deconvolved, Type Automatic	552	Aged	1	Scar	2	20	23	2	2	4	3	4	28	2	54	7.40741	51.8519	50				2020_12_26 Slide287 S1165 CD31_gH2AX 60x Scar 3 arrows	S1165	1
2021_05_27 Slide392 552 CD31_gH2AX 60x Scar 1 - Deconvolved, Type Automatic	552	Aged	1	Scar	1	37	29	2	1	7	5	3	35	1	81	3.7037	43.2099	33.3333				2020_12_26 Slide287 S1165 CD31_gH2AX 60x Scar 4 arrows	S1165	1
																						2020_12_26 Slide287 S1165 CD31_gH2AX 60x Scar 4 arrows	S1165	1
																						2020_12_26 Slide287 S1165 CD31_gH2AX 60x Scar 5 arrows	S1165	3
																						2020_12_26 Slide287 S1165 CD31_gH2AX 60x Scar 5 arrows	S1165	3
																						2020_12_26 Slide287 S1165 CD31_gH2AX 60x Scar 5 arrows	S1165	3
																						2020_12_26 Slide287 S1165 CD31_gH2AX 60x Scar 5 arrows	S1165	1
																						2020_12_26 Slide287 S1165 CD31_gH2AX 60x Scar 5 arrows	S1165	1
																						2020_12_26 Slide287 S1165 CD31_gH2AX 60x Scar 5 arrows	S1165	1
																						2020_12_26 Slide288 B1149 CD31_gH2AX 60x Scar 1 arrows	B1149	4
																						2020_12_26 Slide288 B1149 CD31_gH2AX 60x Scar 1 arrows	B1149	2
																						2020_12_26 Slide288 B1149 CD31_gH2AX 60x Scar 1 arrows	B1149	3
																						2020_12_26 Slide288 B1149 CD31_gH2AX 60x Scar 1 arrows	B1149	2	1
																						2020_12_26 Slide288 B1149 CD31_gH2AX 60x Scar 2 arrows	B1149	2
																						2020_12_26 Slide288 B1149 CD31_gH2AX 60x Scar 2 arrows	B1149	1
																						2020_12_26 Slide288 B1149 CD31_gH2AX 60x Scar 2 arrows	B1149	2
																						2020_12_26 Slide288 B1149 CD31_gH2AX 60x Scar 2 arrows	B1149	1
																						2020_12_26 Slide288 B1149 CD31_gH2AX 60x Scar 3 arrows	B1149	1	2
																						2020_12_26 Slide288 B1149 CD31_gH2AX 60x Scar 3 arrows	B1149	3
																						2020_12_26 Slide288 B1149 CD31_gH2AX 60x Scar 3 arrows	B1149	1
																						2020_12_26 Slide288 B1149 CD31_gH2AX 60x Scar 3 arrows	B1149	1
																						2020_12_26 Slide288 B1149 CD31_gH2AX 60x Scar 3 arrows	B1149	1
																						2020_12_26 Slide288 B1149 CD31_gH2AX 60x Scar 4 arrows	B1149	1
																						2020_12_26 Slide288 B1149 CD31_gH2AX 60x Scar 4 arrows	B1149	1
																						2020_12_26 Slide288 B1149 CD31_gH2AX 60x Scar 5 arrows	B1149	4
																						2020_12_26 Slide288 B1149 CD31_gH2AX 60x Scar 5 arrows	B1149	1
																						2020_12_26 Slide288 B1149 CD31_gH2AX 60x Scar 5 arrows	B1149	1	2
																						2020_12_26 Slide288 B1149 CD31_gH2AX 60x Scar 5 arrows	B1149	2	2
																						2020_12_26 Slide288 B1149 CD31_gH2AX 60x Scar 5 arrows	B1149	3
																						2020_12_26 Slide288 B1149 CD31_gH2AX 60x Scar 5 arrows	B1149	1
																						2020_12_26 Slide289 F894 CD31_gH2AX 60x Scar 1 arrows	F894	4
																						2020_12_26 Slide289 F894 CD31_gH2AX 60x Scar 1 arrows	F894	3
																						2020_12_26 Slide289 F894 CD31_gH2AX 60x Scar 1 arrows	F894	1
																						2020_12_26 Slide289 F894 CD31_gH2AX 60x Scar 1 arrows	F894	1
																						2020_12_26 Slide289 F894 CD31_gH2AX 60x Scar 1 arrows	F894	1
																						2020_12_26 Slide289 F894 CD31_gH2AX 60x Scar 1 arrows	F894	1
																						2020_12_26 Slide289 F894 CD31_gH2AX 60x Scar 2 arrows	F894	3
																						2020_12_26 Slide289 F894 CD31_gH2AX 60x Scar 2 arrows	F894	1
																						2020_12_26 Slide289 F894 CD31_gH2AX 60x Scar 2 arrows	F894	1
																						2020_12_26 Slide289 F894 CD31_gH2AX 60x Scar 2 arrows	F894	4	2
																						2020_12_26 Slide289 F894 CD31_gH2AX 60x Scar 2 arrows	F894	4
																						2020_12_26 Slide289 F894 CD31_gH2AX 60x Scar 2 arrows	F894	2
																						2020_12_26 Slide289 F894 CD31_gH2AX 60x Scar 2 arrows	F894	1
																						2020_12_26 Slide289 F894 CD31_gH2AX 60x Scar 3 arrows	F894	4
																						2020_12_26 Slide289 F894 CD31_gH2AX 60x Scar 3 arrows	F894	1	2
																						2020_12_26 Slide289 F894 CD31_gH2AX 60x Scar 3 arrows	F894	1
																						2020_12_26 Slide289 F894 CD31_gH2AX 60x Scar 4 arrows	F894	1	3
																						2020_12_26 Slide289 F894 CD31_gH2AX 60x Scar 4 arrows	F894	1
																						2020_12_26 Slide289 F894 CD31_gH2AX 60x Scar 4 arrows	F894	1
																						2020_12_26 Slide289 F894 CD31_gH2AX 60x Scar 5 arrows	F894	5
																						2020_12_26 Slide289 F894 CD31_gH2AX 60x Scar 5 arrows	F894	1
																						2020_12_26 Slide289 F894 CD31_gH2AX 60x Scar 5 arrows	F894	2
																						2020_12_26 Slide290 F985 CD31_gH2AX 60x Scar 1 arrows	F985	4
																						2020_12_26 Slide290 F985 CD31_gH2AX 60x Scar 1 arrows	F985	1
																						2020_12_26 Slide290 F985 CD31_gH2AX 60x Scar 1 arrows	F985	1
																						2020_12_26 Slide290 F985 CD31_gH2AX 60x Scar 1 arrows	F985	2
																						2020_12_26 Slide290 F985 CD31_gH2AX 60x Scar 1 arrows	F985	3
																						2020_12_26 Slide290 F985 CD31_gH2AX 60x Scar 1 arrows	F985	1
																						2020_12_26 Slide290 F985 CD31_gH2AX 60x Scar 1 arrows	F985	4
																						2020_12_26 Slide290 F985 CD31_gH2AX 60x Scar 1 arrows	F985	1
																						2020_12_26 Slide290 F985 CD31_gH2AX 60x Scar 1 arrows	F985	4
																						2020_12_26 Slide290 F985 CD31_gH2AX 60x Scar 1 arrows	F985	2
																						2020_12_26 Slide290 F985 CD31_gH2AX 60x Scar 1 arrows	F985	3
																						2020_12_26 Slide290 F985 CD31_gH2AX 60x Scar 1 arrows	F985	2
																						2020_12_26 Slide290 F985 CD31_gH2AX 60x Scar 2 arrows	F985	2
																						2020_12_26 Slide290 F985 CD31_gH2AX 60x Scar 2 arrows	F985	3
																						2020_12_26 Slide290 F985 CD31_gH2AX 60x Scar 2 arrows	F985	3	1
																						2020_12_26 Slide290 F985 CD31_gH2AX 60x Scar 2 arrows	F985	3
																						2020_12_26 Slide290 F985 CD31_gH2AX 60x Scar 2 arrows	F985	5
																						2020_12_26 Slide290 F985 CD31_gH2AX 60x Scar 2 arrows	F985	4
																						2020_12_26 Slide290 F985 CD31_gH2AX 60x Scar 2 arrows	F985	1
																						2020_12_26 Slide290 F985 CD31_gH2AX 60x Scar 2 arrows	F985	3	3
																						2020_12_26 Slide290 F985 CD31_gH2AX 60x Scar 2 arrows	F985	3
																						2020_12_26 Slide290 F985 CD31_gH2AX 60x Scar 2 arrows	F985	4
																						2020_12_26 Slide290 F985 CD31_gH2AX 60x Scar 2 arrows	F985	4
																						2020_12_26 Slide290 F985 CD31_gH2AX 60x Scar 2 arrows	F985	1
																						2020_12_26 Slide290 F985 CD31_gH2AX 60x Scar 3 arrows	F985	3
																						2020_12_26 Slide290 F985 CD31_gH2AX 60x Scar 3 arrows	F985	1
																						2020_12_26 Slide290 F985 CD31_gH2AX 60x Scar 3 arrows	F985	1
																						2020_12_26 Slide290 F985 CD31_gH2AX 60x Scar 3 arrows	F985	1
																						2020_12_26 Slide290 F985 CD31_gH2AX 60x Scar 3 arrows	F985	2
																						2020_12_26 Slide290 F985 CD31_gH2AX 60x Scar 3 arrows	F985	4
																						2020_12_26 Slide290 F985 CD31_gH2AX 60x Scar 3 arrows	F985	4
																						2020_12_26 Slide290 F985 CD31_gH2AX 60x Scar 3 arrows	F985	1
																						2020_12_26 Slide290 F985 CD31_gH2AX 60x Scar 3 arrows	F985	2
																						2020_12_26 Slide290 F985 CD31_gH2AX 60x Scar 3 arrows	F985	2	1
																						2020_12_26 Slide290 F985 CD31_gH2AX 60x Scar 3 arrows	F985	3
																						2020_12_26 Slide290 F985 CD31_gH2AX 60x Scar 3 arrows	F985	1
																						2020_12_26 Slide290 F985 CD31_gH2AX 60x Scar 4 arrow	F985	1
																						2020_12_26 Slide290 F985 CD31_gH2AX 60x Scar 4 arrow	F985	2
																						2020_12_26 Slide290 F985 CD31_gH2AX 60x Scar 4 arrow	F985	1
																						2020_12_26 Slide290 F985 CD31_gH2AX 60x Scar 4 arrow	F985	3
																						2020_12_26 Slide290 F985 CD31_gH2AX 60x Scar 4 arrow	F985	3
																						2020_12_26 Slide290 F985 CD31_gH2AX 60x Scar 4 arrow	F985	1
																						2020_12_26 Slide290 F985 CD31_gH2AX 60x Scar 4 arrow	F985	1
																						2020_12_26 Slide290 F985 CD31_gH2AX 60x Scar 4 arrow	F985	1	2
																						2020_12_26 Slide290 F985 CD31_gH2AX 60x Scar 4 arrow	F985	3
																						2020_12_26 Slide290 F985 CD31_gH2AX 60x Scar 4 arrow	F985	3
																						2020_12_26 Slide290 F985 CD31_gH2AX 60x Scar 4 arrow	F985	1
																						2020_12_26 Slide290 F985 CD31_gH2AX 60x Scar 4 arrow	F985	5
																						2020_12_26 Slide290 F985 CD31_gH2AX 60x Scar 4 arrow	F985	3
																						2020_12_26 Slide290 F985 CD31_gH2AX 60x Scar 4 arrow	F985	1
																						2020_12_26 Slide290 F985 CD31_gH2AX 60x Scar 4 arrow	F985	1
																						2020_12_26 Slide290 F985 CD31_gH2AX 60x Scar 4 arrow	F985	1	3
																						2020_12_26 Slide290 F985 CD31_gH2AX 60x Scar 5 arrows	F985	1	1
																						2020_12_26 Slide290 F985 CD31_gH2AX 60x Scar 5 arrows	F985	1	1
																						2020_12_26 Slide290 F985 CD31_gH2AX 60x Scar 5 arrows	F985	1
																						2020_12_26 Slide290 F985 CD31_gH2AX 60x Scar 5 arrows	F985	1
																						2020_12_26 Slide290 F985 CD31_gH2AX 60x Scar 5 arrows	F985	1
																						2020_12_26 Slide290 F985 CD31_gH2AX 60x Scar 5 arrows	F985	5
																						2020_12_26 Slide290 F985 CD31_gH2AX 60x Scar 5 arrows	F985	1
																						2020_12_26 Slide290 F985 CD31_gH2AX 60x Scar 5 arrows	F985	1
																						2020_12_26 Slide291 X209 CD31_gH2AX 60x Scar 1 arrows	X209	3
																						2020_12_26 Slide291 X209 CD31_gH2AX 60x Scar 1 arrows	X209	1
																						2020_12_26 Slide291 X209 CD31_gH2AX 60x Scar 1 arrows	X209	1
																						2020_12_26 Slide291 X209 CD31_gH2AX 60x Scar 2 arrows	X209	2
																						2020_12_26 Slide291 X209 CD31_gH2AX 60x Scar 2 arrows	X209	2
																						2020_12_26 Slide291 X209 CD31_gH2AX 60x Scar 2 arrows	X209	1
																						2020_12_26 Slide291 X209 CD31_gH2AX 60x Scar 3 arrows	X209	2
																						2020_12_26 Slide291 X209 CD31_gH2AX 60x Scar 3 arrows	X209	1
																						2020_12_26 Slide291 X209 CD31_gH2AX 60x Scar 3 arrows	X209	1
																						2020_12_26 Slide291 X209 CD31_gH2AX 60x Scar 4 arrows	X209	1
																						2020_12_26 Slide291 X209 CD31_gH2AX 60x Scar 4 arrows	X209	1
																						2020_12_26 Slide291 X209 CD31_gH2AX 60x Scar 5 arrows	X209	1
																						2020_12_26 Slide291 X209 CD31_gH2AX 60x Scar 5 arrows	X209	1
																						2020_12_26 Slide291 X209 CD31_gH2AX 60x Scar 5 arrows	X209	1
																						2020_12_26 Slide292 91442 CD31_gH2AX 60x Scar 1 arrows	91442	1	1
																						2020_12_26 Slide292 91442 CD31_gH2AX 60x Scar 2 arrows	91442	5
																						2020_12_26 Slide292 91442 CD31_gH2AX 60x Scar 2 arrows	91442	1
																						2020_12_26 Slide292 91442 CD31_gH2AX 60x Scar 3 arrows	91442	1
																						2020_12_26 Slide292 91442 CD31_gH2AX 60x Scar 3 arrows	91442	1
																						2020_12_26 Slide292 91442 CD31_gH2AX 60x Scar 3 arrows	91442	1
																						2020_12_26 Slide292 91442 CD31_gH2AX 60x Scar 3 arrows	91442	1
																						2020_12_26 Slide292 91442 CD31_gH2AX 60x Scar 4 arrows	91442	2
																						2020_12_26 Slide292 91442 CD31_gH2AX 60x Scar 4 arrows	91442	1
																						2020_12_26 Slide292 91442 CD31_gH2AX 60x Scar 4 arrows	91442	1
																						2020_12_26 Slide292 91442 CD31_gH2AX 60x Scar 5 arrows	91442	1
																						2020_12_26 Slide293 X205 CD31_gH2AX 60x Scar 1 arrows	X205	2
																						2020_12_26 Slide293 X205 CD31_gH2AX 60x Scar 1 arrows	X205	1
																						2020_12_26 Slide293 X205 CD31_gH2AX 60x Scar 1 arrows	X205	1
																						2020_12_26 Slide293 X205 CD31_gH2AX 60x Scar 2 arrows	X205	1
																						2020_12_26 Slide293 X205 CD31_gH2AX 60x Scar 2 arrows	X205	1
																						2020_12_26 Slide293 X205 CD31_gH2AX 60x Scar 2 arrows	X205	1
																						2020_12_26 Slide293 X205 CD31_gH2AX 60x Scar 3 arrows	X205	1
																						2020_12_26 Slide293 X205 CD31_gH2AX 60x Scar 4 arrows	X205	1	1
																						2020_12_26 Slide293 X205 CD31_gH2AX 60x Scar 4 arrows	X205	1	1
																						2020_12_26 Slide293 X205 CD31_gH2AX 60x Scar 5 arrows	X205	3
																						2020_12_26 Slide293 X205 CD31_gH2AX 60x Scar 5 arrows	X205	1
																						2020_12_26 Slide293 X205 CD31_gH2AX 60x Scar 5 arrows	X205	2
																						2020_12_26 Slide293 X205 CD31_gH2AX 60x Scar 5 arrows	X205	1
																						2020_12_26 Slide293 X205 CD31_gH2AX 60x Scar 5 arrows	X205	2
																						2020_12_26 Slide293 X205 CD31_gH2AX 60x Scar 5 arrows	X205	1
																						2020_12_26 Slide293 X205 CD31_gH2AX 60x Scar 5 arrows	X205	1
																						2020_12_26 Slide294 X203 CD31_gH2AX 60x Scar 1 arrows	X203	2	1
																						2020_12_26 Slide294 X203 CD31_gH2AX 60x Scar 1 arrows	X203	2
																						2020_12_26 Slide294 X203 CD31_gH2AX 60x Scar 1 arrows	X203	2
																						2020_12_26 Slide294 X203 CD31_gH2AX 60x Scar 2 arrows	X203	2
																						2020_12_26 Slide294 X203 CD31_gH2AX 60x Scar 2 arrows	X203	6
																						2020_12_26 Slide294 X203 CD31_gH2AX 60x Scar 3 arrows	X203	1
																						2020_12_26 Slide294 X203 CD31_gH2AX 60x Scar 3 arrows	X203	2
																						2020_12_26 Slide294 X203 CD31_gH2AX 60x Scar 4 arrows	X203	1
																						2020_12_26 Slide294 X203 CD31_gH2AX 60x Scar 5 arrows	X203	2
																						2020_12_26 Slide294 X203 CD31_gH2AX 60x Scar 5 arrows	X203	1
																						2020_12_26 Slide294 X203 CD31_gH2AX 60x Scar 5 arrows	X203	1
																						2020_12_26 Slide294 X203 CD31_gH2AX 60x Scar 5 arrows	X203	1
																						2021_01_04 Slide310 F891 CD31_gH2AX 60x Scar 1 arrows	#N/A		1
																						2021_01_04 Slide310 F891 CD31_gH2AX 60x Scar 1 arrows	#N/A	1	2
																						2021_01_04 Slide310 F891 CD31_gH2AX 60x Scar 1 arrows	#N/A		1
																						2021_01_04 Slide310 F891 CD31_gH2AX 60x Scar 2 arows	#N/A	3
																						2021_01_04 Slide310 F891 CD31_gH2AX 60x Scar 2 arows	#N/A	1
																						2021_01_04 Slide310 F891 CD31_gH2AX 60x Scar 2 arows	#N/A	1	1
																						2021_01_04 Slide310 F891 CD31_gH2AX 60x Scar 2 arows	#N/A	1
																						2021_01_04 Slide310 F891 CD31_gH2AX 60x Scar 3 arrows	#N/A	1
																						2021_01_04 Slide310 F891 CD31_gH2AX 60x Scar 3 arrows	#N/A	1
																						2021_01_04 Slide310 F891 CD31_gH2AX 60x Scar 3 arrows	#N/A	1	1
																						2021_01_04 Slide310 F891 CD31_gH2AX 60x Scar 4 arrows	#N/A	1	1
																						2021_01_04 Slide310 F891 CD31_gH2AX 60x Scar 4 arrows	#N/A	1	1
																						2021_01_04 Slide310 F891 CD31_gH2AX 60x Scar 4 arrows	#N/A	3
																						2021_01_04 Slide310 F891 CD31_gH2AX 60x Scar 4 arrows	#N/A	1
																						2021_01_04 Slide310 F891 CD31_gH2AX 60x Scar 4 arrows	#N/A	1
																						2021_01_04 Slide310 F891 CD31_gH2AX 60x Scar 4 arrows	#N/A	1
																						2021_01_04 Slide310 F891 CD31_gH2AX 60x Scar 4 arrows	#N/A	2	1
																						2021_01_04 Slide310 F891 CD31_gH2AX 60x Scar 4 arrows	#N/A	2
																						2021_01_04 Slide310 F891 CD31_gH2AX 60x Scar 5 arrows	#N/A		1
																						2021_01_04 Slide310 F891 CD31_gH2AX 60x Scar 5 arrows	#N/A	2	1
																						2021_01_04 Slide310 F891 CD31_gH2AX 60x Scar 5 arrows	#N/A	1	2
																						2021_01_04 Slide310 F891 CD31_gH2AX 60x Scar 5 arrows	#N/A	1
																						2021_01_04 Slide311 X245 CD31_gH2AX 60x Scar 1 arrows	X245	1
																						2021_01_04 Slide311 X245 CD31_gH2AX 60x Scar 1 arrows	X245	2	2
																						2021_01_04 Slide311 X245 CD31_gH2AX 60x Scar 1 arrows	X245	1	1
																						2021_01_04 Slide311 X245 CD31_gH2AX 60x Scar 1 arrows	X245	4
																						2021_01_04 Slide311 X245 CD31_gH2AX 60x Scar 1 arrows	X245	2
																						2021_01_04 Slide311 X245 CD31_gH2AX 60x Scar 1 arrows	X245	1
																						2021_01_04 Slide311 X245 CD31_gH2AX 60x Scar 2 arrows	X245	1
																						2021_01_04 Slide311 X245 CD31_gH2AX 60x Scar 2 arrows	X245	1
																						2021_01_04 Slide311 X245 CD31_gH2AX 60x Scar 2 arrows	X245	1
																						2021_01_04 Slide311 X245 CD31_gH2AX 60x Scar 2 arrows	X245	1
																						2021_01_04 Slide311 X245 CD31_gH2AX 60x Scar 2 arrows	X245	2	1
																						2021_01_04 Slide311 X245 CD31_gH2AX 60x Scar 2 arrows	X245	2	1
																						2021_01_04 Slide311 X245 CD31_gH2AX 60x Scar 2 arrows	X245	1
																						2021_01_04 Slide311 X245 CD31_gH2AX 60x Scar 3 arrows	X245	1
																						2021_01_04 Slide311 X245 CD31_gH2AX 60x Scar 3 arrows	X245	1	1
																						2021_01_04 Slide311 X245 CD31_gH2AX 60x Scar 3 arrows	X245	1
																						2021_01_04 Slide311 X245 CD31_gH2AX 60x Scar 3 arrows	X245	1
																						2021_01_04 Slide311 X245 CD31_gH2AX 60x Scar 3 arrows	X245	1
																						2021_01_04 Slide311 X245 CD31_gH2AX 60x Scar 4 arrows	X245	4
																						2021_01_04 Slide311 X245 CD31_gH2AX 60x Scar 4 arrows	X245	3
																						2021_01_04 Slide311 X245 CD31_gH2AX 60x Scar 4 arrows	X245	2
																						2021_01_04 Slide311 X245 CD31_gH2AX 60x Scar 4 arrows	X245	1
																						2021_01_04 Slide311 X245 CD31_gH2AX 60x Scar 4 arrows	X245	1
																						2021_01_04 Slide311 X245 CD31_gH2AX 60x Scar 4 arrows	X245	1
																						2021_01_04 Slide311 X245 CD31_gH2AX 60x Scar 4 arrows	X245	1
																						2021_01_04 Slide311 X245 CD31_gH2AX 60x Scar 4 arrows	X245	1
																						2021_01_04 Slide311 X245 CD31_gH2AX 60x Scar 5 arrows	X245	5
																						2021_01_04 Slide311 X245 CD31_gH2AX 60x Scar 5 arrows	X245	2
																						2021_01_04 Slide311 X245 CD31_gH2AX 60x Scar 5 arrows	X245	1
																						2021_01_04 Slide311 X245 CD31_gH2AX 60x Scar 5 arrows	X245	1
																						2021_01_04 Slide311 X245 CD31_gH2AX 60x Scar 5 arrows	X245	3
																						2021_01_04 Slide311 X245 CD31_gH2AX 60x Scar 5 arrows	X245	1
																						2021_01_04 Slide312 5043 CD31_gH2AX 60x Scar 1 arrows	5043	1	5
																						2021_01_04 Slide312 5043 CD31_gH2AX 60x Scar 1 arrows	5043	4	1
																						2021_01_04 Slide312 5043 CD31_gH2AX 60x Scar 1 arrows	5043	1	1
																						2021_01_04 Slide312 5043 CD31_gH2AX 60x Scar 1 arrows	5043	2
																						2021_01_04 Slide312 5043 CD31_gH2AX 60x Scar 1 arrows	5043	2
																						2021_01_04 Slide312 5043 CD31_gH2AX 60x Scar 1 arrows	5043	1
																						2021_01_04 Slide312 5043 CD31_gH2AX 60x Scar 1 arrows	5043	4	1
																						2021_01_04 Slide312 5043 CD31_gH2AX 60x Scar 1 arrows	5043	3
																						2021_01_04 Slide312 5043 CD31_gH2AX 60x Scar 1 arrows	5043	7
																						2021_01_04 Slide312 5043 CD31_gH2AX 60x Scar 1 arrows	5043	2
																						2021_01_04 Slide312 5043 CD31_gH2AX 60x Scar 1 arrows	5043	1
																						2021_01_04 Slide312 5043 CD31_gH2AX 60x Scar 1 arrows	5043	2
																						2021_01_04 Slide312 5043 CD31_gH2AX 60x Scar 1 arrows	5043	1
																						2021_01_04 Slide312 5043 CD31_gH2AX 60x Scar 1 arrows	5043	1
																						2021_01_04 Slide312 5043 CD31_gH2AX 60x Scar 1 arrows	5043	2
																						2021_01_04 Slide312 5043 CD31_gH2AX 60x Scar 1 arrows	5043	4
																						2021_01_04 Slide312 5043 CD31_gH2AX 60x Scar 1 arrows	5043	5
																						2021_01_04 Slide312 5043 CD31_gH2AX 60x Scar 1 arrows	5043	4
																						2021_01_04 Slide312 5043 CD31_gH2AX 60x Scar 1 arrows	5043	1
																						2021_01_04 Slide312 5043 CD31_gH2AX 60x Scar 1 arrows	5043	1	3
																						2021_01_04 Slide312 5043 CD31_gH2AX 60x Scar 1 arrows	5043	1
																						2021_01_04 Slide312 5043 CD31_gH2AX 60x Scar 1 arrows	5043	1
																						2021_01_04 Slide312 5043 CD31_gH2AX 60x Scar 1 arrows	5043	1
																						2021_01_04 Slide312 5043 CD31_gH2AX 60x Scar 1 arrows	5043	1
																						2021_01_04 Slide312 5043 CD31_gH2AX 60x Scar 1 arrows	5043	2
																						2021_01_04 Slide312 5043 CD31_gH2AX 60x Scar 1 arrows	5043	2
																						2021_01_04 Slide312 5043 CD31_gH2AX 60x Scar 1 arrows	5043	1
																						2021_01_04 Slide312 5043 CD31_gH2AX 60x Scar 1 arrows	5043	1
																						2021_01_04 Slide312 5043 CD31_gH2AX 60x Scar 1 arrows	5043	2
																						2021_01_04 Slide312 5043 CD31_gH2AX 60x Scar 2 arrows	5043	1
																						2021_01_04 Slide312 5043 CD31_gH2AX 60x Scar 2 arrows	5043	2
																						2021_01_04 Slide312 5043 CD31_gH2AX 60x Scar 2 arrows	5043	1
																						2021_01_04 Slide312 5043 CD31_gH2AX 60x Scar 2 arrows	5043	1
																						2021_01_04 Slide312 5043 CD31_gH2AX 60x Scar 2 arrows	5043	3
																						2021_01_04 Slide312 5043 CD31_gH2AX 60x Scar 2 arrows	5043	6
																						2021_01_04 Slide312 5043 CD31_gH2AX 60x Scar 2 arrows	5043	1
																						2021_01_04 Slide312 5043 CD31_gH2AX 60x Scar 2 arrows	5043	2
																						2021_01_04 Slide312 5043 CD31_gH2AX 60x Scar 2 arrows	5043	1
																						2021_01_04 Slide312 5043 CD31_gH2AX 60x Scar 2 arrows	5043	1
																						2021_01_04 Slide312 5043 CD31_gH2AX 60x Scar 2 arrows	5043	3
																						2021_01_04 Slide312 5043 CD31_gH2AX 60x Scar 3 arrows	5043	1	1
																						2021_01_04 Slide312 5043 CD31_gH2AX 60x Scar 3 arrows	5043	2
																						2021_01_04 Slide312 5043 CD31_gH2AX 60x Scar 3 arrows	5043	1
																						2021_01_04 Slide312 5043 CD31_gH2AX 60x Scar 3 arrows	5043	3
																						2021_01_04 Slide312 5043 CD31_gH2AX 60x Scar 3 arrows	5043	1
																						2021_01_04 Slide312 5043 CD31_gH2AX 60x Scar 3 arrows	5043	1
																						2021_01_04 Slide312 5043 CD31_gH2AX 60x Scar 3 arrows	5043	1
																						2021_01_04 Slide312 5043 CD31_gH2AX 60x Scar 3 arrows	5043	1
																						2021_01_04 Slide312 5043 CD31_gH2AX 60x Scar 3 arrows	5043	1
																						2021_01_04 Slide312 5043 CD31_gH2AX 60x Scar 3 arrows	5043	1
																						2021_01_04 Slide312 5043 CD31_gH2AX 60x Scar 3 arrows	5043	2
																						2021_01_04 Slide312 5043 CD31_gH2AX 60x Scar 3 arrows	5043	2
																						2021_01_04 Slide312 5043 CD31_gH2AX 60x Scar 3 arrows	5043	5
																						2021_01_04 Slide312 5043 CD31_gH2AX 60x Scar 3 arrows	5043	1
																						2021_01_04 Slide312 5043 CD31_gH2AX 60x Scar 3 arrows	5043	1
																						2021_01_04 Slide312 5043 CD31_gH2AX 60x Scar 4 arrows	5043	3	1
																						2021_01_04 Slide312 5043 CD31_gH2AX 60x Scar 4 arrows	5043	1
																						2021_01_04 Slide312 5043 CD31_gH2AX 60x Scar 4 arrows	5043	2
																						2021_01_04 Slide312 5043 CD31_gH2AX 60x Scar 4 arrows	5043	3
																						2021_01_04 Slide312 5043 CD31_gH2AX 60x Scar 4 arrows	5043	3	1
																						2021_01_04 Slide312 5043 CD31_gH2AX 60x Scar 4 arrows	5043	1	2
																						2021_01_04 Slide312 5043 CD31_gH2AX 60x Scar 4 arrows	5043	2	1
																						2021_01_04 Slide312 5043 CD31_gH2AX 60x Scar 4 arrows	5043	1	2
																						2021_01_04 Slide312 5043 CD31_gH2AX 60x Scar 4 arrows	5043	1
																						2021_01_04 Slide312 5043 CD31_gH2AX 60x Scar 4 arrows	5043	3
																						2021_01_04 Slide312 5043 CD31_gH2AX 60x Scar 4 arrows	5043	1
																						2021_01_04 Slide312 5043 CD31_gH2AX 60x Scar 4 arrows	5043	1
																						2021_01_04 Slide312 5043 CD31_gH2AX 60x Scar 5 arrows	5043	4
																						2021_01_04 Slide312 5043 CD31_gH2AX 60x Scar 5 arrows	5043	2
																						2021_01_04 Slide312 5043 CD31_gH2AX 60x Scar 5 arrows	5043	2
																						2021_01_04 Slide312 5043 CD31_gH2AX 60x Scar 5 arrows	5043	2
																						2021_01_04 Slide312 5043 CD31_gH2AX 60x Scar 5 arrows	5043	3
																						2021_01_04 Slide312 5043 CD31_gH2AX 60x Scar 5 arrows	5043	1
																						2021_01_04 Slide312 5043 CD31_gH2AX 60x Scar 5 arrows	5043	3
																						2021_01_04 Slide312 5043 CD31_gH2AX 60x Scar 5 arrows	5043	3
																						2021_01_04 Slide312 5043 CD31_gH2AX 60x Scar 5 arrows	5043	2
																						2021_01_04 Slide312 5043 CD31_gH2AX 60x Scar 5 arrows	5043	1
																						2021_01_04 Slide312 5043 CD31_gH2AX 60x Scar 5 arrows	5043	2
																						2021_01_04 Slide312 5043 CD31_gH2AX 60x Scar 5 arrows	5043	2
																						2021_01_04 Slide314 F322 CD31_gH2AX 20x Scar 1 arrows	F322	5
																						2021_01_04 Slide314 F322 CD31_gH2AX 20x Scar 1 arrows	F322	1
																						2021_01_04 Slide314 F322 CD31_gH2AX 20x Scar 1 arrows	F322	1
																						2021_01_04 Slide314 F322 CD31_gH2AX 20x Scar 1 arrows	F322	3
																						2021_01_04 Slide314 F322 CD31_gH2AX 20x Scar 1 arrows	F322	3
																						2021_01_04 Slide314 F322 CD31_gH2AX 20x Scar 1 arrows	F322	2
																						2021_01_04 Slide314 F322 CD31_gH2AX 20x Scar 2 arrows	F322	2
																						2021_01_04 Slide314 F322 CD31_gH2AX 20x Scar 2 arrows	F322	3	1
																						2021_01_04 Slide314 F322 CD31_gH2AX 20x Scar 2 arrows	F322		1
																						2021_01_04 Slide314 F322 CD31_gH2AX 20x Scar 2 arrows	F322	1	4
																						2021_01_04 Slide314 F322 CD31_gH2AX 20x Scar 2 arrows	F322	1
																						2021_01_04 Slide314 F322 CD31_gH2AX 20x Scar 2 arrows	F322	1
																						2021_01_04 Slide314 F322 CD31_gH2AX 20x Scar 2 arrows	F322	2
																						2021_01_04 Slide314 F322 CD31_gH2AX 20x Scar 2 arrows	F322	2	2
																						2021_01_04 Slide314 F322 CD31_gH2AX 20x Scar 2 arrows	F322	1	1
																						2021_01_04 Slide314 F322 CD31_gH2AX 20x Scar 2 arrows	F322	1
																						2021_01_04 Slide314 F322 CD31_gH2AX 20x Scar 2 arrows	F322	2
																						2021_01_04 Slide314 F322 CD31_gH2AX 20x Scar 2 arrows	F322	2
																						2021_01_04 Slide314 F322 CD31_gH2AX 20x Scar 3 arrows	F322	4
																						2021_01_04 Slide314 F322 CD31_gH2AX 20x Scar 3 arrows	F322	4
																						2021_01_04 Slide314 F322 CD31_gH2AX 20x Scar 3 arrows	F322	2
																						2021_01_04 Slide314 F322 CD31_gH2AX 20x Scar 3 arrows	F322	1
																						2021_01_04 Slide314 F322 CD31_gH2AX 20x Scar 3 arrows	F322	3	2
																						2021_01_04 Slide314 F322 CD31_gH2AX 20x Scar 3 arrows	F322	1	3
																						2021_01_04 Slide314 F322 CD31_gH2AX 20x Scar 3 arrows	F322	1
																						2021_01_04 Slide314 F322 CD31_gH2AX 20x Scar 3 arrows	F322	1
																						2021_01_04 Slide314 F322 CD31_gH2AX 20x Scar 3 arrows	F322	3
																						2021_01_04 Slide314 F322 CD31_gH2AX 20x Scar 4 arrows	F322	3	2
																						2021_01_04 Slide314 F322 CD31_gH2AX 20x Scar 4 arrows	F322	1
																						2021_01_04 Slide314 F322 CD31_gH2AX 20x Scar 4 arrows	F322	1
																						2021_01_04 Slide314 F322 CD31_gH2AX 20x Scar 4 arrows	F322	1
																						2021_01_04 Slide314 F322 CD31_gH2AX 20x Scar 5 arrows	F322	3	1
																						2021_01_04 Slide314 F322 CD31_gH2AX 20x Scar 5 arrows	F322		1
																						2021_01_04 Slide316 H962 CD31_gH2AX 60x Scar 1 arrows	H962
																						2021_01_04 Slide316 H962 CD31_gH2AX 60x Scar 2 arrows	H962	3	3
																						2021_01_04 Slide316 H962 CD31_gH2AX 60x Scar 2 arrows	H962	1
																						2021_01_04 Slide316 H962 CD31_gH2AX 60x Scar 2 arrows	H962	4
																						2021_01_04 Slide316 H962 CD31_gH2AX 60x Scar 2 arrows	H962	6	3
																						2021_01_04 Slide316 H962 CD31_gH2AX 60x Scar 2 arrows	H962	3
																						2021_01_04 Slide316 H962 CD31_gH2AX 60x Scar 2 arrows	H962	4
																						2021_01_04 Slide316 H962 CD31_gH2AX 60x Scar 2 arrows	H962	2
																						2021_01_04 Slide316 H962 CD31_gH2AX 60x Scar 2 arrows	H962	4	3
																						2021_01_04 Slide316 H962 CD31_gH2AX 60x Scar 2 arrows	H962	3
																						2021_01_04 Slide316 H962 CD31_gH2AX 60x Scar 2 arrows	H962	3
																						2021_01_04 Slide316 H962 CD31_gH2AX 60x Scar 2 arrows	H962	2
																						2021_01_04 Slide316 H962 CD31_gH2AX 60x Scar 2 arrows	H962	3
																						2021_01_04 Slide316 H962 CD31_gH2AX 60x Scar 2 arrows	H962	1
																						2021_01_04 Slide316 H962 CD31_gH2AX 60x Scar 2 arrows	H962	3
																						2021_01_04 Slide316 H962 CD31_gH2AX 60x Scar 3 arrows	H962	3	4
																						2021_01_04 Slide316 H962 CD31_gH2AX 60x Scar 3 arrows	H962	4
																						2021_01_04 Slide316 H962 CD31_gH2AX 60x Scar 3 arrows	H962	2
																						2021_01_04 Slide316 H962 CD31_gH2AX 60x Scar 3 arrows	H962	1
																						2021_01_04 Slide316 H962 CD31_gH2AX 60x Scar 3 arrows	H962	3
																						2021_01_04 Slide316 H962 CD31_gH2AX 60x Scar 3 arrows	H962	3
																						2021_01_04 Slide316 H962 CD31_gH2AX 60x Scar 3 arrows	H962	2
																						2021_01_04 Slide316 H962 CD31_gH2AX 60x Scar 3 arrows	H962	2
																						2021_01_04 Slide316 H962 CD31_gH2AX 60x Scar 3 arrows	H962	2
																						2021_01_04 Slide316 H962 CD31_gH2AX 60x Scar 3 arrows	H962	3	1
																						2021_01_04 Slide316 H962 CD31_gH2AX 60x Scar 4 arrows	H962	3
																						2021_01_04 Slide316 H962 CD31_gH2AX 60x Scar 4 arrows	H962	2
																						2021_01_04 Slide316 H962 CD31_gH2AX 60x Scar 4 arrows	H962	3
																						2021_01_04 Slide316 H962 CD31_gH2AX 60x Scar 4 arrows	H962	1
																						2021_01_04 Slide316 H962 CD31_gH2AX 60x Scar 4 arrows	H962	3
																						2021_01_04 Slide316 H962 CD31_gH2AX 60x Scar 4 arrows	H962	3
																						2021_01_04 Slide316 H962 CD31_gH2AX 60x Scar 4 arrows	H962	3
																						2021_01_04 Slide316 H962 CD31_gH2AX 60x Scar 4 arrows	H962	3
																						2021_01_04 Slide316 H962 CD31_gH2AX 60x Scar 4 arrows	H962	3	3
																						2021_01_04 Slide316 H962 CD31_gH2AX 60x Scar 4 arrows	H962	2
																						2021_01_04 Slide316 H962 CD31_gH2AX 60x Scar 5 arrows	H962	1
																						2021_01_04 Slide316 H962 CD31_gH2AX 60x Scar 5 arrows	H962	2
																						2021_01_04 Slide316 H962 CD31_gH2AX 60x Scar 5 arrows	H962	1
																						2021_01_04 Slide316 H962 CD31_gH2AX 60x Scar 5 arrows	H962	2
																						2021_01_04 Slide316 H962 CD31_gH2AX 60x Scar 5 arrows	H962	3
																						2021_01_04 Slide316 H962 CD31_gH2AX 60x Scar 5 arrows	H962	2
																						2021_01_04 Slide316 H962 CD31_gH2AX 60x Scar 5 arrows	H962	2
																						2021_01_04 Slide316 H962 CD31_gH2AX 60x Scar 5 arrows	H962	2
																						2021_01_04 Slide316 H962 CD31_gH2AX 60x Scar 5 arrows	H962	5
																						2021_01_05 Slide307 5001 CD31_gH2AX 60x Scar 1 arrows	5001	1
																						2021_01_05 Slide307 5001 CD31_gH2AX 60x Scar 1 arrows	5001	1
																						2021_01_05 Slide307 5001 CD31_gH2AX 60x Scar 1 arrows	5001	1
																						2021_01_05 Slide307 5001 CD31_gH2AX 60x Scar 1 arrows	5001	1
																						2021_01_05 Slide307 5001 CD31_gH2AX 60x Scar 1 arrows	5001	2
																						2021_01_05 Slide307 5001 CD31_gH2AX 60x Scar 1 arrows	5001	3
																						2021_01_05 Slide307 5001 CD31_gH2AX 60x Scar 1 arrows	5001	2
																						2021_01_05 Slide307 5001 CD31_gH2AX 60x Scar 1 arrows	5001	2
																						2021_01_05 Slide307 5001 CD31_gH2AX 60x Scar 1 arrows	5001	2
																						2021_01_05 Slide307 5001 CD31_gH2AX 60x Scar 1 arrows	5001	7
																						2021_01_05 Slide307 5001 CD31_gH2AX 60x Scar 1 arrows	5001	4
																						2021_01_05 Slide307 5001 CD31_gH2AX 60x Scar 1 arrows	5001	2
																						2021_01_05 Slide307 5001 CD31_gH2AX 60x Scar 2 arrows	5001	4
																						2021_01_05 Slide307 5001 CD31_gH2AX 60x Scar 2 arrows	5001	1	1
																						2021_01_05 Slide307 5001 CD31_gH2AX 60x Scar 2 arrows	5001	3
																						2021_01_05 Slide307 5001 CD31_gH2AX 60x Scar 2 arrows	5001	2
																						2021_01_05 Slide307 5001 CD31_gH2AX 60x Scar 3 arrows	5001	2
																						2021_01_05 Slide307 5001 CD31_gH2AX 60x Scar 3 arrows	5001	3
																						2021_01_05 Slide307 5001 CD31_gH2AX 60x Scar 3 arrows	5001	1
																						2021_01_05 Slide307 5001 CD31_gH2AX 60x Scar 3 arrows	5001	2
																						2021_01_05 Slide307 5001 CD31_gH2AX 60x Scar 3 arrows	5001	3	1
																						2021_01_05 Slide307 5001 CD31_gH2AX 60x Scar 3 arrows	5001	4
																						2021_01_05 Slide307 5001 CD31_gH2AX 60x Scar 4 arrowss	5001	3
																						2021_01_05 Slide307 5001 CD31_gH2AX 60x Scar 4 arrowss	5001	1
																						2021_01_05 Slide307 5001 CD31_gH2AX 60x Scar 4 arrowss	5001	1
																						2021_01_05 Slide307 5001 CD31_gH2AX 60x Scar 4 arrowss	5001	1
																						2021_01_05 Slide307 5001 CD31_gH2AX 60x Scar 4 arrowss	5001	2
																						2021_01_05 Slide307 5001 CD31_gH2AX 60x Scar 4 arrowss	5001	7
																						2021_01_05 Slide307 5001 CD31_gH2AX 60x Scar 4 arrowss	5001	2	1
																						2021_01_05 Slide307 5001 CD31_gH2AX 60x Scar 4 arrowss	5001	2	2
																						2021_01_05 Slide307 5001 CD31_gH2AX 60x Scar 4 arrowss	5001	1
																						2021_01_05 Slide307 5001 CD31_gH2AX 60x Scar 4 arrowss	5001	3
																						2021_01_05 Slide307 5001 CD31_gH2AX 60x Scar 4 arrowss	5001	3	2
																						2021_01_05 Slide307 5001 CD31_gH2AX 60x Scar 4 arrowss	5001	1	1
																						2021_01_05 Slide307 5001 CD31_gH2AX 60x Scar 5 arrows	5001	3
																						2021_01_05 Slide307 5001 CD31_gH2AX 60x Scar 5 arrows	5001	4
																						2021_01_05 Slide307 5001 CD31_gH2AX 60x Scar 5 arrows	5001	2
																						2021_01_05 Slide307 5001 CD31_gH2AX 60x Scar 5 arrows	5001	3
																						2021_01_05 Slide307 5001 CD31_gH2AX 60x Scar 5 arrows	5001	1
																						2021_01_05 Slide307 5001 CD31_gH2AX 60x Scar 5 arrows	5001	2	6
																						2021_01_05 Slide307 5001 CD31_gH2AX 60x Scar 5 arrows	5001	1
																						2021_01_05 Slide307 5001 CD31_gH2AX 60x Scar 5 arrows	5001	2
																						2021_01_05 Slide307 5001 CD31_gH2AX 60x Scar 5 arrows	5001	1
																						2021_01_05 Slide307 5001 CD31_gH2AX 60x Scar 5 arrows	5001	2
																						2021_01_05 Slide307 5001 CD31_gH2AX 60x Scar 5 arrows	5001	3
																						2021_01_05 Slide307 5001 CD31_gH2AX 60x Scar 5 arrows	5001	2
																						2021_01_05 Slide307 5001 CD31_gH2AX 60x Scar 5 arrows	5001	2
																						2021_01_05 Slide307 5001 CD31_gH2AX 60x Scar 5 arrows	5001	1
																						2021_01_05 Slide307 5001 CD31_gH2AX 60x Scar 5 arrows	5001	1
																						2021_01_05 Slide307 5001 CD31_gH2AX 60x Scar 5 arrows	5001	1
																						2021_01_05 Slide308 D216 CD31_gH2AX 60x Scar 1 arrows	D216	1
																						2021_01_05 Slide308 D216 CD31_gH2AX 60x Scar 1 arrows	D216	2
																						2021_01_05 Slide308 D216 CD31_gH2AX 60x Scar 1 arrows	D216	2
																						2021_01_05 Slide308 D216 CD31_gH2AX 60x Scar 1 arrows	D216	1
																						2021_01_05 Slide308 D216 CD31_gH2AX 60x Scar 1 arrows	D216	2
																						2021_01_05 Slide308 D216 CD31_gH2AX 60x Scar 1 arrows	D216	1
																						2021_01_05 Slide308 D216 CD31_gH2AX 60x Scar 1 arrows	D216	1
																						2021_01_05 Slide308 D216 CD31_gH2AX 60x Scar 2 arrows	D216	5
																						2021_01_05 Slide308 D216 CD31_gH2AX 60x Scar 2 arrows	D216	2
																						2021_01_05 Slide308 D216 CD31_gH2AX 60x Scar 3 arrow	D216	1
																						2021_01_05 Slide308 D216 CD31_gH2AX 60x Scar 3 arrow	D216	1
																						2021_01_05 Slide308 D216 CD31_gH2AX 60x Scar 3 arrow	D216	2
																						2021_01_05 Slide308 D216 CD31_gH2AX 60x Scar 3 arrow	D216	1
																						2021_01_05 Slide308 D216 CD31_gH2AX 60x Scar 3 arrow	D216	1
																						2021_01_05 Slide308 D216 CD31_gH2AX 60x Scar 3 arrow	D216	3
																						2021_01_05 Slide308 D216 CD31_gH2AX 60x Scar 3 arrow	D216	2
																						2021_01_05 Slide308 D216 CD31_gH2AX 60x Scar 4 arrows	D216	1	6
																						2021_01_05 Slide308 D216 CD31_gH2AX 60x Scar 4 arrows	D216	1
																						2021_01_05 Slide308 D216 CD31_gH2AX 60x Scar 4 arrows	D216	1	2
																						2021_01_05 Slide308 D216 CD31_gH2AX 60x Scar 4 arrows	D216	5
																						2021_01_05 Slide308 D216 CD31_gH2AX 60x Scar 4 arrows	D216	2
																						2021_01_05 Slide308 D216 CD31_gH2AX 60x Scar 5 ar	D216		1
																						2021_01_05 Slide308 D216 CD31_gH2AX 60x Scar 5 ar	D216		2
																						2021_01_05 Slide308 D216 CD31_gH2AX 60x Scar 5 ar	D216		4
																						2021_01_05 Slide308 D216 CD31_gH2AX 60x Scar 5 ar	D216	1	1
																						2021_01_05 Slide308 D216 CD31_gH2AX 60x Scar 5 ar	D216		1
																						2021_01_05 Slide309 C567 CD31_gH2AX 60x Scar 1 arr	C567		1
																						2021_01_05 Slide309 C567 CD31_gH2AX 60x Scar 1 arr	C567		2
																						2021_01_05 Slide309 C567 CD31_gH2AX 60x Scar 1 arr	C567		1
																						2021_01_05 Slide309 C567 CD31_gH2AX 60x Scar 1 arr	C567		1
																						2021_01_05 Slide309 C567 CD31_gH2AX 60x Scar 1 arr	C567		3
																						2021_01_05 Slide309 C567 CD31_gH2AX 60x Scar 1 arr	C567	2	1
																						2021_01_05 Slide309 C567 CD31_gH2AX 60x Scar 1 arr	C567		1
																						2021_01_05 Slide309 C567 CD31_gH2AX 60x Scar 2 arr	C567	5
																						2021_01_05 Slide309 C567 CD31_gH2AX 60x Scar 2 arr	C567	1
																						2021_01_05 Slide309 C567 CD31_gH2AX 60x Scar 2 arr	C567	1
																						2021_01_05 Slide309 C567 CD31_gH2AX 60x Scar 2 arr	C567	5
																						2021_01_05 Slide309 C567 CD31_gH2AX 60x Scar 2 arr	C567	1	1
																						2021_01_05 Slide309 C567 CD31_gH2AX 60x Scar 3 arr	C567		7
																						2021_01_05 Slide309 C567 CD31_gH2AX 60x Scar 3 arr	C567	2	1
																						2021_01_05 Slide309 C567 CD31_gH2AX 60x Scar 3 arr	C567	1
																						2021_01_05 Slide309 C567 CD31_gH2AX 60x Scar 4 arr	C567	1	1
																						2021_01_05 Slide309 C567 CD31_gH2AX 60x Scar 4 arr	C567	2	1
																						2021_01_05 Slide309 C567 CD31_gH2AX 60x Scar 4 arr	C567	1
																						2021_01_05 Slide309 C567 CD31_gH2AX 60x Scar 5 arr	C567	4	2
																						2021_01_05 Slide309 C567 CD31_gH2AX 60x Scar 5 arr	C567		1
																						2021_01_05 Slide315 F949 CD31_gH2AX 60x Scar 1 arrows	F949	3
																						2021_01_05 Slide315 F949 CD31_gH2AX 60x Scar 1 arrows	F949	1
																						2021_01_05 Slide315 F949 CD31_gH2AX 60x Scar 1 arrows	F949	3
																						2021_01_05 Slide315 F949 CD31_gH2AX 60x Scar 1 arrows	F949	3
																						2021_01_05 Slide315 F949 CD31_gH2AX 60x Scar 1 arrows	F949	1
																						2021_01_05 Slide315 F949 CD31_gH2AX 60x Scar 1 arrows	F949	3
																						2021_01_05 Slide315 F949 CD31_gH2AX 60x Scar 1 arrows	F949	1
																						2021_01_05 Slide315 F949 CD31_gH2AX 60x Scar 2 arrows	F949	1
																						2021_01_05 Slide315 F949 CD31_gH2AX 60x Scar 2 arrows	F949	2
																						2021_01_05 Slide315 F949 CD31_gH2AX 60x Scar 2 arrows	F949	4
																						2021_01_05 Slide315 F949 CD31_gH2AX 60x Scar 2 arrows	F949	1
																						2021_01_05 Slide315 F949 CD31_gH2AX 60x Scar 2 arrows	F949	1
																						2021_01_05 Slide315 F949 CD31_gH2AX 60x Scar 2 arrows	F949	1
																						2021_01_05 Slide315 F949 CD31_gH2AX 60x Scar 2 arrows	F949	1
																						2021_01_05 Slide315 F949 CD31_gH2AX 60x Scar 3 arrows	F949	1
																						2021_01_05 Slide315 F949 CD31_gH2AX 60x Scar 3 arrows	F949	1
																						2021_01_05 Slide315 F949 CD31_gH2AX 60x Scar 3 arrows	F949	3
																						2021_01_05 Slide315 F949 CD31_gH2AX 60x Scar 3 arrows	F949	1
																						2021_01_05 Slide315 F949 CD31_gH2AX 60x Scar 4 arrows	F949	1
																						2021_01_05 Slide315 F949 CD31_gH2AX 60x Scar 4 arrows	F949	2	1
																						2021_01_05 Slide315 F949 CD31_gH2AX 60x Scar 5 arrows	F949	2
																						2021_01_05 Slide315 F949 CD31_gH2AX 60x Scar 5 arrows	F949	1
																						2021_01_05 Slide315 F949 CD31_gH2AX 60x Scar 5 arrows	F949	1
																						2021_01_05 Slide315 F949 CD31_gH2AX 60x Scar 5 arrows	F949	1
																						2021_01_05 Slide315 F949 CD31_gH2AX 60x Scar 5 arrows	F949	1
																						2021_01_05 Slide315 F949 CD31_gH2AX 60x Scar 5 arrows	F949	1
																						2021_01_05 Slide315 F949 CD31_gH2AX 60x Scar 5 arrows	F949	1
																						2021_01_05 Slide315 F949 CD31_gH2AX 60x Scar 5 arrows	F949	1
																						2021_01_15 Slide324 D212 CD31_gH2AX 60x Scar 1 arrows	D212	2
																						2021_01_15 Slide324 D212 CD31_gH2AX 60x Scar 2 arrows	D212	3
																						2021_01_15 Slide324 D212 CD31_gH2AX 60x Scar 2 arrows	D212	2
																						2021_01_15 Slide324 D212 CD31_gH2AX 60x Scar 2 arrows	D212	3
																						2021_01_15 Slide324 D212 CD31_gH2AX 60x Scar 2 arrows	D212	3
																						2021_01_15 Slide324 D212 CD31_gH2AX 60x Scar 2 arrows	D212	1
																						2021_01_15 Slide324 D212 CD31_gH2AX 60x Scar 2 arrows	D212	3
																						2021_01_15 Slide324 D212 CD31_gH2AX 60x Scar 2 arrows	D212	2
																						2021_01_15 Slide324 D212 CD31_gH2AX 60x Scar 2 arrows	D212	1
																						2021_01_15 Slide324 D212 CD31_gH2AX 60x Scar 2 arrows	D212	2
																						2021_01_15 Slide324 D212 CD31_gH2AX 60x Scar 2 arrows	D212	1
																						2021_01_15 Slide324 D212 CD31_gH2AX 60x Scar 2 arrows	D212	1
																						2021_01_15 Slide324 D212 CD31_gH2AX 60x Scar 3 arrows	D212	5
																						2021_01_15 Slide324 D212 CD31_gH2AX 60x Scar 3 arrows	D212	2
																						2021_01_15 Slide324 D212 CD31_gH2AX 60x Scar 3 arrows	D212	5
																						2021_01_15 Slide324 D212 CD31_gH2AX 60x Scar 4 arrows	D212	1
																						2021_01_15 Slide324 D212 CD31_gH2AX 60x Scar 4 arrows	D212	2
																						2021_01_15 Slide324 D212 CD31_gH2AX 60x Scar 4 arrows	D212	2
																						2021_01_15 Slide324 D212 CD31_gH2AX 60x Scar 4 arrows	D212	1	1
																						2021_01_15 Slide324 D212 CD31_gH2AX 60x Scar 4 arrows	D212	2
																						2021_01_15 Slide324 D212 CD31_gH2AX 60x Scar 4 arrows	D212	1
																						2021_01_15 Slide324 D212 CD31_gH2AX 60x Scar 4 arrows	D212	3
																						2021_01_15 Slide324 D212 CD31_gH2AX 60x Scar 4 arrows	D212	2
																						2021_01_15 Slide324 D212 CD31_gH2AX 60x Scar 4 arrows	D212	1
																						2021_01_15 Slide324 D212 CD31_gH2AX 60x Scar 4 arrows	D212	1
																						2021_01_15 Slide324 D212 CD31_gH2AX 60x Scar 4 arrows	D212	1
																						2021_01_15 Slide324 D212 CD31_gH2AX 60x Scar 4 arrows	D212	1
																						2021_01_15 Slide324 D212 CD31_gH2AX 60x Scar 4 arrows	D212	1
																						2021_01_15 Slide324 D212 CD31_gH2AX 60x Scar 4 arrows	D212	1
																						2021_01_15 Slide324 D212 CD31_gH2AX 60x Scar 4 arrows	D212	1
																						2021_01_15 Slide324 D212 CD31_gH2AX 60x Scar 4 arrows	D212	1
																						2021_01_15 Slide324 D212 CD31_gH2AX 60x Scar 5 arrows	D212	3
																						2021_01_15 Slide324 D212 CD31_gH2AX 60x Scar 5 arrows	D212	4
																						2021_01_15 Slide324 D212 CD31_gH2AX 60x Scar 5 arrows	D212	1
																						2021_01_15 Slide325 X247 CD31_gH2AX 60x Scar 1 arrows	X247	3
																						2021_01_15 Slide325 X247 CD31_gH2AX 60x Scar 1 arrows	X247	2
																						2021_01_15 Slide325 X247 CD31_gH2AX 60x Scar 1 arrows	X247	1
																						2021_01_15 Slide325 X247 CD31_gH2AX 60x Scar 1 arrows	X247	6
																						2021_01_15 Slide325 X247 CD31_gH2AX 60x Scar 1 arrows	X247	2
																						2021_01_15 Slide325 X247 CD31_gH2AX 60x Scar 2 arrows	X247	1
																						2021_01_15 Slide325 X247 CD31_gH2AX 60x Scar 3 arrows	X247	4
																						2021_01_15 Slide325 X247 CD31_gH2AX 60x Scar 3 arrows	X247	1
																						2021_01_15 Slide325 X247 CD31_gH2AX 60x Scar 3 arrows	X247	1
																						2021_01_15 Slide325 X247 CD31_gH2AX 60x Scar 3 arrows	X247	1
																						2021_01_15 Slide325 X247 CD31_gH2AX 60x Scar 4 arrows	X247	1
																						2021_01_15 Slide325 X247 CD31_gH2AX 60x Scar 4 arrows	X247	1
																						2021_01_15 Slide325 X247 CD31_gH2AX 60x Scar 5 arrows	X247	3
																						2021_01_15 Slide325 X247 CD31_gH2AX 60x Scar 5 arrows	X247	1
																						2021_01_15 Slide325 X247 CD31_gH2AX 60x Scar 5 arrows	X247	3
																						2021_01_15 Slide325 X247 CD31_gH2AX 60x Scar 5 arrows	X247	1
																						2021_01_15 Slide326 F184 CD31_gH2AX 60x Scar 1 arrows	F184	1	2
																						2021_01_15 Slide326 F184 CD31_gH2AX 60x Scar 1 arrows	F184	1
																						2021_01_15 Slide326 F184 CD31_gH2AX 60x Scar 2 arrows	F184	2
																						2021_01_15 Slide326 F184 CD31_gH2AX 60x Scar 3 arrows	F184	3
																						2021_01_15 Slide326 F184 CD31_gH2AX 60x Scar 4 arrows	F184	5	3
																						2021_01_15 Slide326 F184 CD31_gH2AX 60x Scar 4 arrows	F184		3
																						2021_01_15 Slide326 F184 CD31_gH2AX 60x Scar 5 arrows	F184	1
																						2021_04_22 SlideX Rabbit 554 CD31_gH2AX 60x Scar 1 arrows	554	3
																						2021_04_22 SlideX Rabbit 554 CD31_gH2AX 60x Scar 1 arrows	554	1	2
																						2021_04_22 SlideX Rabbit 554 CD31_gH2AX 60x Scar 1 arrows	554	9
																						2021_04_22 SlideX Rabbit 554 CD31_gH2AX 60x Scar 1 arrows	554	2
																						2021_04_22 SlideX Rabbit 554 CD31_gH2AX 60x Scar 1 arrows	554	1
																						2021_04_22 SlideX Rabbit 554 CD31_gH2AX 60x Scar 1 arrows	554	5
																						2021_04_22 SlideX Rabbit 554 CD31_gH2AX 60x Scar 1 arrows	554	5
																						2021_04_22 SlideX Rabbit 554 CD31_gH2AX 60x Scar 1 arrows	554	1
																						2021_04_22 SlideX Rabbit 554 CD31_gH2AX 60x Scar 1 arrows	554	2
																						2021_04_22 SlideX Rabbit 554 CD31_gH2AX 60x Scar 2 arrows	554	1
																						2021_04_22 SlideX Rabbit 554 CD31_gH2AX 60x Scar 2 arrows	554	3
																						2021_04_22 SlideX Rabbit 554 CD31_gH2AX 60x Scar 2 arrows	554	1
																						2021_04_22 SlideX Rabbit 554 CD31_gH2AX 60x Scar 2 arrows	554	2
																						2021_04_22 SlideX Rabbit 554 CD31_gH2AX 60x Scar 2 arrows	554	1	4
																						2021_04_22 SlideX Rabbit 554 CD31_gH2AX 60x Scar 2 arrows	554	4
																						2021_04_22 SlideX Rabbit 554 CD31_gH2AX 60x Scar 2 arrows	554	2
																						2021_04_22 SlideX Rabbit 554 CD31_gH2AX 60x Scar 2 arrows	554	2
																						2021_04_22 SlideX Rabbit 554 CD31_gH2AX 60x Scar 2 arrows	554	2
																						2021_04_22 SlideX Rabbit 554 CD31_gH2AX 60x Scar 2 arrows	554	1
																						2021_04_22 SlideX Rabbit 554 CD31_gH2AX 60x Scar 2 arrows	554	3
																						2021_04_22 SlideX Rabbit 554 CD31_gH2AX 60x Scar 2 arrows	554	3
																						2021_04_22 SlideX Rabbit 554 CD31_gH2AX 60x Scar 2 arrows	554	1
																						2021_04_22 SlideX Rabbit 554 CD31_gH2AX 60x Scar 2 arrows	554	1
																						2021_04_22 SlideX Rabbit 554 CD31_gH2AX 60x Scar 2 arrows	554	1
																						2021_04_22 SlideX Rabbit 554 CD31_gH2AX 60x Scar 3 arrows	554		3
																						2021_04_22 SlideX Rabbit 554 CD31_gH2AX 60x Scar 3 arrows	554	2
																						2021_04_22 SlideX Rabbit 554 CD31_gH2AX 60x Scar 3 arrows	554	1
																						2021_04_22 SlideX Rabbit 554 CD31_gH2AX 60x Scar 3 arrows	554	10
																						2021_04_22 SlideX Rabbit 554 CD31_gH2AX 60x Scar 3 arrows	554	4	1
																						2021_04_22 SlideX Rabbit 554 CD31_gH2AX 60x Scar 3 arrows	554	2
																						2021_04_22 SlideX Rabbit 554 CD31_gH2AX 60x Scar 3 arrows	554	1
																						2021_04_22 SlideX Rabbit 554 CD31_gH2AX 60x Scar 3 arrows	554	5
																						2021_04_22 SlideX Rabbit 554 CD31_gH2AX 60x Scar 3 arrows	554	3
																						2021_04_22 SlideX Rabbit 554 CD31_gH2AX 60x Scar 4 arrows	554	2	5
																						2021_04_22 SlideX Rabbit 554 CD31_gH2AX 60x Scar 4 arrows	554	2
																						2021_04_22 SlideX Rabbit 554 CD31_gH2AX 60x Scar 4 arrows	554	2
																						2021_04_22 SlideX Rabbit 554 CD31_gH2AX 60x Scar 4 arrows	554	1
																						2021_04_22 SlideX Rabbit 554 CD31_gH2AX 60x Scar 4 arrows	554	1
																						2021_04_22 SlideX Rabbit 554 CD31_gH2AX 60x Scar 4 arrows	554	1
																						2021_04_22 SlideX Rabbit 554 CD31_gH2AX 60x Scar 4 arrows	554	1
																						2021_04_22 SlideX Rabbit 554 CD31_gH2AX 60x Scar 4 arrows	554	3
																						2021_04_22 SlideX Rabbit 554 CD31_gH2AX 60x Scar 4 arrows	554	1
																						2021_04_22 SlideX Rabbit 554 CD31_gH2AX 60x Scar 4 arrows	554	3
																						2021_04_22 SlideX Rabbit 554 CD31_gH2AX 60x Scar 4 arrows	554	2
																						2021_04_22 SlideX Rabbit 554 CD31_gH2AX 60x Scar 4 arrows	554	1
																						2021_04_22 SlideX Rabbit 554 CD31_gH2AX 60x Scar 4 arrows	554	3
																						2021_04_22 SlideX Rabbit 554 CD31_gH2AX 60x Scar 5 arrows	554	2
																						2021_04_22 SlideX Rabbit 554 CD31_gH2AX 60x Scar 5 arrows	554	1
																						2021_04_22 SlideX Rabbit 554 CD31_gH2AX 60x Scar 5 arrows	554	1
																						2021_04_22 SlideX Rabbit 554 CD31_gH2AX 60x Scar 5 arrows	554	3
																						2021_04_22 SlideX Rabbit 554 CD31_gH2AX 60x Scar 5 arrows	554	1
																						2021_04_22 SlideX Rabbit 554 CD31_gH2AX 60x Scar 5 arrows	554	2
																						2021_04_22 SlideX Rabbit 554 CD31_gH2AX 60x Scar 5 arrows	554	3
																						2021_04_22 SlideX Rabbit 554 CD31_gH2AX 60x Scar 5 arrows	554	1
																						2021_04_22 SlideX Rabbit 554 CD31_gH2AX 60x Scar 5 arrows	554	1
																						2021_04_22 SlideX Rabbit 554 CD31_gH2AX 60x Scar 5 arrows	554	1
																						2021_01_05 Slide313 X161 CD31_gH2AX 60x Scar 5-MaxIP arows	X161	2	2
																						2021_01_05 Slide313 X161 CD31_gH2AX 60x Scar 5-MaxIP arows	X161	1	2
																						2021_01_05 Slide313 X161 CD31_gH2AX 60x Scar 5-MaxIP arows	X161	1	1
																						2021_01_05 Slide313 X161 CD31_gH2AX 60x Scar 5-MaxIP arows	X161	3
																						2021_01_05 Slide313 X161 CD31_gH2AX 60x Scar 5-MaxIP arows	X161	1
																						2021_01_05 Slide313 X161 CD31_gH2AX 60x Scar 5-MaxIP arows	X161	2
																						2021_01_05 Slide313 X161 CD31_gH2AX 60x Scar 5-MaxIP arows	X161	1
																						2021_01_05 Slide313 X161 CD31_gH2AX 60x Scar 5-MaxIP arows	X161	1
																						2021_01_05 Slide313 X161 CD31_gH2AX 60x Scar 5-MaxIP arows	X161	1
																						2021_01_05 Slide313 X161 CD31_gH2AX 60x Scar 4-MaxIP arrows	X161	2
																						2021_01_05 Slide313 X161 CD31_gH2AX 60x Scar 4-MaxIP arrows	X161	3
																						2021_01_05 Slide313 X161 CD31_gH2AX 60x Scar 4-MaxIP arrows	X161	1
																						2021_01_05 Slide313 X161 CD31_gH2AX 60x Scar 4-MaxIP arrows	X161	3
																						2021_01_05 Slide313 X161 CD31_gH2AX 60x Scar 4-MaxIP arrows	X161	3
																						2021_01_05 Slide313 X161 CD31_gH2AX 60x Scar 4-MaxIP arrows	X161	1
																						2021_01_05 Slide313 X161 CD31_gH2AX 60x Scar 4-MaxIP arrows	X161	1
																						2021_01_05 Slide313 X161 CD31_gH2AX 60x Scar 4-MaxIP arrows	X161	1
																						2021_01_05 Slide313 X161 CD31_gH2AX 60x Scar 4-MaxIP arrows	X161	1
																						2021_01_05 Slide313 X161 CD31_gH2AX 60x Scar 4-MaxIP arrows	X161	1
																						2021_01_05 Slide313 X161 CD31_gH2AX 60x Scar 4-MaxIP arrows	X161	1
																						2021_01_05 Slide313 X161 CD31_gH2AX 60x Scar 4-MaxIP arrows	X161	1
																						2021_01_05 Slide313 X161 CD31_gH2AX 60x Scar 4-MaxIP arrows	X161	2
																						2021_01_05 Slide313 X161 CD31_gH2AX 60x Scar 4-MaxIP arrows	X161	2
																						2021_01_05 Slide313 X161 CD31_gH2AX 60x Scar 4-MaxIP arrows	X161	3
																						2021_01_05 Slide313 X161 CD31_gH2AX 60x Scar 4-MaxIP arrows	X161	1
																						2021_01_05 Slide313 X161 CD31_gH2AX 60x Scar 4-MaxIP arrows	X161	1
																						2021_01_05 Slide313 X161 CD31_gH2AX 60x Scar 4-MaxIP arrows	X161	1
																						2021_01_05 Slide313 X161 CD31_gH2AX 60x Scar 4-MaxIP arrows	X161	4
																						2021_01_05 Slide313 X161 CD31_gH2AX 60x Scar 4-MaxIP arrows	X161	3
																						2021_01_05 Slide313 X161 CD31_gH2AX 60x Scar 4-MaxIP arrows	X161	5
																						2021_01_05 Slide313 X161 CD31_gH2AX 60x Scar 4-MaxIP arrows	X161	1
																						2021_01_05 Slide313 X161 CD31_gH2AX 60x Scar 4-MaxIP arrows	X161	2
																						2021_01_05 Slide313 X161 CD31_gH2AX 60x Scar 4-MaxIP arrows	X161	3
																						2021_01_05 Slide313 X161 CD31_gH2AX 60x Scar 4-MaxIP arrows	X161	1
																						2021_01_05 Slide313 X161 CD31_gH2AX 60x Scar 4-MaxIP arrows	X161	1
																						2021_01_05 Slide313 X161 CD31_gH2AX 60x Scar 4-MaxIP arrows	X161	1
																						2021_01_05 Slide313 X161 CD31_gH2AX 60x Scar 3-MaxIP arrows	X161	2
																						2021_01_05 Slide313 X161 CD31_gH2AX 60x Scar 3-MaxIP arrows	X161	2
																						2021_01_05 Slide313 X161 CD31_gH2AX 60x Scar 3-MaxIP arrows	X161	4
																						2021_01_05 Slide313 X161 CD31_gH2AX 60x Scar 3-MaxIP arrows	X161	2
																						2021_01_05 Slide313 X161 CD31_gH2AX 60x Scar 3-MaxIP arrows	X161	1
																						2021_01_05 Slide313 X161 CD31_gH2AX 60x Scar 3-MaxIP arrows	X161	1
																						2021_01_05 Slide313 X161 CD31_gH2AX 60x Scar 3-MaxIP arrows	X161	3
																						2021_01_05 Slide313 X161 CD31_gH2AX 60x Scar 3-MaxIP arrows	X161	2
																						2021_01_05 Slide313 X161 CD31_gH2AX 60x Scar 3-MaxIP arrows	X161	1	1
																						2021_01_05 Slide313 X161 CD31_gH2AX 60x Scar 3-MaxIP arrows	X161	1	1
																						2021_01_05 Slide313 X161 CD31_gH2AX 60x Scar 3-MaxIP arrows	X161	1
																						2021_01_05 Slide313 X161 CD31_gH2AX 60x Scar 3-MaxIP arrows	X161	1
																						2021_01_05 Slide313 X161 CD31_gH2AX 60x Scar 3-MaxIP arrows	X161	1
																						2021_01_05 Slide313 X161 CD31_gH2AX 60x Scar 3-MaxIP arrows	X161	1
																						2021_01_05 Slide313 X161 CD31_gH2AX 60x Scar 3-MaxIP arrows	X161	1
																						2021_01_05 Slide313 X161 CD31_gH2AX 60x Scar 3-MaxIP arrows	X161	1
																						2021_01_05 Slide313 X161 CD31_gH2AX 60x Scar 3-MaxIP arrows	X161	1
																						2021_01_05 Slide313 X161 CD31_gH2AX 60x Scar 3-MaxIP arrows	X161	2
																						2021_01_05 Slide313 X161 CD31_gH2AX 60x Scar 2-MaxIP arows	X161	1
																						2021_01_05 Slide313 X161 CD31_gH2AX 60x Scar 2-MaxIP arows	X161	2
																						2021_01_05 Slide313 X161 CD31_gH2AX 60x Scar 2-MaxIP arows	X161	1
																						2021_01_05 Slide313 X161 CD31_gH2AX 60x Scar 2-MaxIP arows	X161	2
																						2021_01_05 Slide313 X161 CD31_gH2AX 60x Scar 2-MaxIP arows	X161	2
																						2021_01_05 Slide313 X161 CD31_gH2AX 60x Scar 2-MaxIP arows	X161	1
																						2021_01_05 Slide313 X161 CD31_gH2AX 60x Scar 2-MaxIP arows	X161	2
																						2021_01_05 Slide313 X161 CD31_gH2AX 60x Scar 2-MaxIP arows	X161	1
																						2021_01_05 Slide313 X161 CD31_gH2AX 60x Scar 2-MaxIP arows	X161	2
																						2021_01_05 Slide313 X161 CD31_gH2AX 60x Scar 2-MaxIP arows	X161	1
																						2021_01_05 Slide313 X161 CD31_gH2AX 60x Scar 2-MaxIP arows	X161	2
																						2021_01_05 Slide313 X161 CD31_gH2AX 60x Scar 2-MaxIP arows	X161	3
																						2021_01_05 Slide313 X161 CD31_gH2AX 60x Scar 2-MaxIP arows	X161	1	1
																						2021_01_05 Slide313 X161 CD31_gH2AX 60x Scar 2-MaxIP arows	X161	2	1
																						2021_01_05 Slide313 X161 CD31_gH2AX 60x Scar 2-MaxIP arows	X161	3	1
																						2021_01_05 Slide313 X161 CD31_gH2AX 60x Scar 2-MaxIP arows	X161	2
																						2021_01_05 Slide313 X161 CD31_gH2AX 60x Scar 2-MaxIP arows	X161	1
																						2021_01_05 Slide313 X161 CD31_gH2AX 60x Scar 2-MaxIP arows	X161	5
																						2021_01_05 Slide313 X161 CD31_gH2AX 60x Scar 2-MaxIP arows	X161	3
																						2021_01_05 Slide313 X161 CD31_gH2AX 60x Scar 2-MaxIP arows	X161	1
																						2021_01_05 Slide313 X161 CD31_gH2AX 60x Scar 2-MaxIP arows	X161	1	2
																						2021_01_05 Slide313 X161 CD31_gH2AX 60x Scar 2-MaxIP arows	X161	1
																						2021_01_05 Slide313 X161 CD31_gH2AX 60x Scar 2-MaxIP arows	X161	2
																						2021_01_05 Slide313 X161 CD31_gH2AX 60x Scar 2-MaxIP arows	X161	1
																						2021_01_05 Slide313 X161 CD31_gH2AX 60x Scar 2-MaxIP arows	X161	3
																						2021_01_05 Slide313 X161 CD31_gH2AX 60x Scar 2-MaxIP arows	X161	5
																						2021_01_05 Slide313 X161 CD31_gH2AX 60x Scar 2-MaxIP arows	X161	3
																						2021_01_05 Slide313 X161 CD31_gH2AX 60x Scar 2-MaxIP arows	X161	1
																						2021_01_05 Slide313 X161 CD31_gH2AX 60x Scar 2-MaxIP arows	X161	1
																						2021_01_05 Slide313 X161 CD31_gH2AX 60x Scar 2-MaxIP arows	X161	3
																						2021_01_05 Slide313 X161 CD31_gH2AX 60x Scar 2-MaxIP arows	X161	1
																						2021_01_05 Slide313 X161 CD31_gH2AX 60x Scar 2-MaxIP arows	X161	1
																						2021_01_05 Slide313 X161 CD31_gH2AX 60x Scar 2-MaxIP arows	X161	1
																						2021_01_05 Slide313 X161 CD31_gH2AX 60x Scar 2-MaxIP arows	X161	1	1
																						2021_01_05 Slide313 X161 CD31_gH2AX 60x Scar 1-MaxIP arrows	X161	3
																						2021_01_05 Slide313 X161 CD31_gH2AX 60x Scar 1-MaxIP arrows	X161	8
																						2021_01_05 Slide313 X161 CD31_gH2AX 60x Scar 1-MaxIP arrows	X161	5
																						2021_01_05 Slide313 X161 CD31_gH2AX 60x Scar 1-MaxIP arrows	X161	2
																						2021_01_05 Slide313 X161 CD31_gH2AX 60x Scar 1-MaxIP arrows	X161	2
																						2021_01_05 Slide313 X161 CD31_gH2AX 60x Scar 1-MaxIP arrows	X161	2
																						2021_01_05 Slide313 X161 CD31_gH2AX 60x Scar 1-MaxIP arrows	X161	2
																						2021_01_05 Slide313 X161 CD31_gH2AX 60x Scar 1-MaxIP arrows	X161	4
																						2021_01_05 Slide313 X161 CD31_gH2AX 60x Scar 1-MaxIP arrows	X161	1
																						2021_01_05 Slide313 X161 CD31_gH2AX 60x Scar 1-MaxIP arrows	X161	4
																						2021_01_05 Slide313 X161 CD31_gH2AX 60x Scar 1-MaxIP arrows	X161	3
																						2021_01_05 Slide313 X161 CD31_gH2AX 60x Scar 1-MaxIP arrows	X161	2
																						2021_01_05 Slide313 X161 CD31_gH2AX 60x Scar 1-MaxIP arrows	X161	3
																						2021_01_05 Slide313 X161 CD31_gH2AX 60x Scar 1-MaxIP arrows	X161	1
																						2021_01_05 Slide313 X161 CD31_gH2AX 60x Scar 1-MaxIP arrows	X161	3
																						2021_01_05 Slide313 X161 CD31_gH2AX 60x Scar 1-MaxIP arrows	X161	2
																						2021_01_05 Slide313 X161 CD31_gH2AX 60x Scar 1-MaxIP arrows	X161	1
																						2021_01_05 Slide313 X161 CD31_gH2AX 60x Scar 1-MaxIP arrows	X161	4
																						2021_01_05 Slide313 X161 CD31_gH2AX 60x Scar 1-MaxIP arrows	X161	2
																						2021_01_05 Slide313 X161 CD31_gH2AX 60x Scar 1-MaxIP arrows	X161	1
																						2021_01_05 Slide313 X161 CD31_gH2AX 60x Scar 1-MaxIP arrows	X161	2
																						2021_01_05 Slide313 X161 CD31_gH2AX 60x Scar 1-MaxIP arrows	X161	3
																						2021_01_05 Slide313 X161 CD31_gH2AX 60x Scar 1-MaxIP arrows	X161	1	2
																						2021_01_05 Slide313 X161 CD31_gH2AX 60x Scar 1-MaxIP arrows	X161	3
																						2021_01_05 Slide313 X161 CD31_gH2AX 60x Scar 1-MaxIP arrows	X161	2
																						2021_01_05 Slide313 X161 CD31_gH2AX 60x Scar 1-MaxIP arrows	X161	1
																						2021_01_05 Slide313 X161 CD31_gH2AX 60x Scar 1-MaxIP arrows	X161	3
																						2021_01_05 Slide313 X161 CD31_gH2AX 60x Scar 1-MaxIP arrows	X161	1
																						2021_01_05 Slide313 X161 CD31_gH2AX 60x Scar 1-MaxIP arrows	X161	2
																						2021_05_27 Slide392 552 CD31_gH2AX 60x Scar 5 - Deconvolved, Type Automatic	552	1
																						2021_05_27 Slide392 552 CD31_gH2AX 60x Scar 5 - Deconvolved, Type Automatic	552	2
																						2021_05_27 Slide392 552 CD31_gH2AX 60x Scar 5 - Deconvolved, Type Automatic	552	2
																						2021_05_27 Slide392 552 CD31_gH2AX 60x Scar 5 - Deconvolved, Type Automatic	552	3
																						2021_05_27 Slide392 552 CD31_gH2AX 60x Scar 5 - Deconvolved, Type Automatic	552	3
																						2021_05_27 Slide392 552 CD31_gH2AX 60x Scar 5 - Deconvolved, Type Automatic	552	1
																						2021_05_27 Slide392 552 CD31_gH2AX 60x Scar 5 - Deconvolved, Type Automatic	552	1
																						2021_05_27 Slide392 552 CD31_gH2AX 60x Scar 5 - Deconvolved, Type Automatic	552	2
																						2021_05_27 Slide392 552 CD31_gH2AX 60x Scar 5 - Deconvolved, Type Automatic	552	2
																						2021_05_27 Slide392 552 CD31_gH2AX 60x Scar 5 - Deconvolved, Type Automatic	552	1
																						2021_05_27 Slide392 552 CD31_gH2AX 60x Scar 5 - Deconvolved, Type Automatic	552	3
																						2021_05_27 Slide392 552 CD31_gH2AX 60x Scar 4 - Deconvolved, Type Automatic	552
																						2021_05_27 Slide392 552 CD31_gH2AX 60x Scar 3 - Deconvolved, Type Automatic	552	1	3
																						2021_05_27 Slide392 552 CD31_gH2AX 60x Scar 3 - Deconvolved, Type Automatic	552	2
																						2021_05_27 Slide392 552 CD31_gH2AX 60x Scar 3 - Deconvolved, Type Automatic	552	1
																						2021_05_27 Slide392 552 CD31_gH2AX 60x Scar 3 - Deconvolved, Type Automatic	552	3	2
																						2021_05_27 Slide392 552 CD31_gH2AX 60x Scar 3 - Deconvolved, Type Automatic	552	2	4
																						2021_05_27 Slide392 552 CD31_gH2AX 60x Scar 3 - Deconvolved, Type Automatic	552		1
																						2021_05_27 Slide392 552 CD31_gH2AX 60x Scar 2 - Deconvolved, Type Automatic	552	4
																						2021_05_27 Slide392 552 CD31_gH2AX 60x Scar 2 - Deconvolved, Type Automatic	552	1
																						2021_05_27 Slide392 552 CD31_gH2AX 60x Scar 2 - Deconvolved, Type Automatic	552	2	5
																						2021_05_27 Slide392 552 CD31_gH2AX 60x Scar 2 - Deconvolved, Type Automatic	552	3	1
																						2021_05_27 Slide392 552 CD31_gH2AX 60x Scar 2 - Deconvolved, Type Automatic	552	1	1
																						2021_05_27 Slide392 552 CD31_gH2AX 60x Scar 2 - Deconvolved, Type Automatic	552	1	5
																						2021_05_27 Slide392 552 CD31_gH2AX 60x Scar 2 - Deconvolved, Type Automatic	552		1
																						2021_05_27 Slide392 552 CD31_gH2AX 60x Scar 1 - Deconvolved, Type Automatic	552	1
																						2021_05_27 Slide392 552 CD31_gH2AX 60x Scar 1 - Deconvolved, Type Automatic	552	1	2
																						2021_05_27 Slide392 552 CD31_gH2AX 60x Scar 1 - Deconvolved, Type Automatic	552	1	3
																						2021_05_27 Slide392 552 CD31_gH2AX 60x Scar 1 - Deconvolved, Type Automatic	552	1
																						2021_05_27 Slide392 552 CD31_gH2AX 60x Scar 1 - Deconvolved, Type Automatic	552	1	1
																						2021_05_27 Slide392 552 CD31_gH2AX 60x Scar 1 - Deconvolved, Type Automatic	552	1
																						2021_05_27 Slide392 552 CD31_gH2AX 60x Scar 1 - Deconvolved, Type Automatic	552	2	1
																						2021_05_27 Slide392 552 CD31_gH2AX 60x Scar 1 - Deconvolved, Type Automatic	552	5	1
																						2021_05_27 Slide392 552 CD31_gH2AX 60x Scar 1 - Deconvolved, Type Automatic	552	3	1

## Sheet: Panel H
Animals	Sex	Phenotype	DOB	Study Date	DOD	Age	Age Group	Weeks post-MI						dCT										Young	Young	Young	Aged	Aged	Aged			Young	Young	Young	Aged	Aged	Aged		2^-ddCT (Relative Expression)	Young	Young	Young	Aged	Aged	Aged		Log2 FC	Young	Young
3837	F	LMC2	2013-09-01	2014-07-08	2014-07-29	0y10m7d	Young	3			Target	Age	Zone	Estimate	Standard Error	DF	t Value	Pr > |t|	Alpha	Lower	Upper		Estimate (dCT)	RZ	IBZ	Scar	RZ	IBZ	Scar		ddCT	RZ	IBZ	Scar	RZ	IBZ	Scar		ddCT	RZ	IBZ	Scar	RZ	IBZ	Scar		ddCT	RZ	IBZ
4348	F	LMC2G	2013-12-14	2014-07-10	2014-07-31	0y6m26d	Young	3		ANFAgedIBZ	ANF	Aged	IBZ	6.3696	1.4538	19	4.38	0.0003	0.05	3.3268	9.4124		p16	11.8237	10.8789	9.7169	8.8794	8.3154	7.099		p16	0	-0.9448	-2.1068	-2.9443	-3.5083	-4.7247		p16	1	1.92492	4.30735	7.69702	11.379	26.4409		p16	0	0.9448
5067	F	LMC2	2016-05-01	2016-12-19	2017-01-10	0y7m18d	Young	3.14286		ANFAgedRZ	ANF	Aged	RZ	9.0172	0.3043	19	29.63	<.0001	0.05	8.3802	9.6541		p21	12.9414	11.9074	11.1155	11.7356	10.8638	9.0392		p21	0	-1.034	-1.8259	-1.2058	-2.0776	-3.9022		p21	1	2.04769	3.54528	2.30665	4.22104	14.9513		p21	0	1.034
C598	F	LMC1	2016-07-05	2016-12-12	2017-01-10	0y5m7d	Young	4.14286		ANFAgedScar	ANF	Aged	Scar	3.0408	0.7357	19	4.13	0.0006	0.05	1.5009	4.5806		p53	4.8747	5.0177	4.5164	4.7121	4.6296	4.0598		p53	0	0.143	-0.3583	-0.1626	-0.2451	-0.8149		p53	1	0.905634	1.28191	1.1193	1.18517	1.75918		p53	0	-0.143
CH111	F	RBSN	2010-08-16	2014-11-18	2014-11-19	4y3m2d	Aged	0.142857		ANFYoungIBZ	ANF	Young	IBZ	4.2885	1.8297	19	2.34	0.0301	0.05	0.4589	8.1181		TGFB	7.0398	7.0055	6.1478	6.8284	7.1196	5.4374		TGFB	0	-0.0343	-0.892	-0.2114	0.0798	-1.6024		TGFB	1	1.02406	1.85575	1.15781	0.946189	3.03648		TGFB	0	0.0343
CH256	F	RBSN	2010-09-19	2015-01-08	2015-01-30	4y3m20d	Aged	3.14286		ANFYoungRZ	ANF	Young	RZ	9.552	1.0138	19	9.42	<.0001	0.05	7.43	11.674		IL6	12.1495	12.6617	12.3868	13.0392	14.2856	10.6839		IL6	0	0.5122	0.2373	0.8897	2.1361	-1.4656		IL6	1	0.701152	0.848331	0.539726	0.227494	2.76178		IL6	0	-0.5122
CH303	F	RBSN	2011-09-11	2016-01-18	2016-02-09	4y4m7d	Aged	3.14286		ANFYoungScar	ANF	Young	Scar	4.2024	0.6857	19	6.13	<.0001	0.05	2.7672	5.6375		CCL2	6.5183	5.5189	5.6988	6.0565	6.4165	5.0319		CCL2	0	-0.9994	-0.8195	-0.4618	-0.1018	-1.4864		CCL2	1	1.99917	1.76479	1.37726	1.07311	2.80189		CCL2	0	0.9994
CH374	F	RBSN	2011-12-12	2016-01-26	2016-02-17	4y1m14d	Aged	3.14286		CCL2AgedIBZ	CCL2	Aged	IBZ	6.4165	0.2454	20	26.15	<.0001	0.05	5.9046	6.9284		CXCL2	8.8376	8.9624	8.5872	8.1435	8.3746	7.5634		CXCL2	0	0.1248	-0.2504	-0.6941	-0.463	-1.2742		CXCL2	1	0.917131	1.18954	1.61787	1.37841	2.41865		CXCL2	0	-0.1248
S700	F	RBSN	2010-07-19	2014-12-15	2015-01-07	4y4m26d	Aged	3.28571		CCL2AgedRZ	CCL2	Aged	RZ	6.0565	0.266	20	22.77	<.0001	0.05	5.5017	6.6113		MMP9	14.6948	15.6485	13.3468	12.5354	14.0878	11.8541		MMP9	0	0.9537	-1.348	-2.1594	-0.607	-2.8407		MMP9	1	0.516307	2.54559	4.46729	1.52309	7.16368		MMP9	0	-0.9537
X107	F	RBSN	2015-10-17	2016-05-23	2016-06-15	0y7m6d	Young	3.28571		CCL2AgedScar	CCL2	Aged	Scar	5.0319	0.1839	20	27.36	<.0001	0.05	4.6483	5.4155		TIMP1	9.4958	7.5168	6.9295	7.4013	8.064	5.9063		TIMP1	0	-1.979	-2.5663	-2.0945	-1.4318	-3.5895		TIMP1	1	3.9422	5.92288	4.27078	2.69783	12.0378		TIMP1	0	1.979
X108	F	RBSN	2015-10-17	2016-05-24	2016-06-15	0y7m7d	Young	3.14286		CCL2YoungIBZ	CCL2	Young	IBZ	5.5189	0.3683	20	14.98	<.0001	0.05	4.7506	6.2873		TIMP2	5.3745	4.8984	3.8916	4.9922	4.5313	2.8224		TIMP2	0	-0.4761	-1.4829	-0.3823	-0.8432	-2.5521		TIMP2	1	1.39098	2.7951	1.30342	1.79403	5.86487		TIMP2	0	0.4761
X180	F	RBSN	2011-08-25	2016-01-19	2016-02-10	4y4m25d	Aged	3.14286		CCL2YoungRZ	CCL2	Young	RZ	6.5183	0.4352	20	14.98	<.0001	0.05	5.6104	7.4261		ANF	9.552	4.2885	4.2024	9.0172	6.3696	3.0408		ANF	0	-5.2635	-5.3496	-0.5348	-3.1824	-6.5112		ANF	1	38.4124	40.7746	1.44874	9.07816	91.2151		ANF	0	5.2635
										CCL2YoungScar	CCL2	Young	Scar	5.6988	0.3511	20	16.23	<.0001	0.05	4.9664	6.4311		CXCL1	8.8838	8.9899	8.5295	8.1948	8.6237	8.128		CXCL1	0	0.1061	-0.3543	-0.689	-0.2601	-0.7558		CXCL1	1	0.929096	1.27837	1.61217	1.19756	1.68857		CXCL1	0	-0.1061
										CXCL1AgedIBZ	CXCL1	Aged	IBZ	8.6237	0.2311	20	37.32	<.0001	0.05	8.1416	9.1057		MMP1	9.0525	9.8604	9.3608	8.9019	9.3576	9.1719		MMP1	0	0.8079	0.3083	-0.1506	0.3051	0.1194		MMP1	1	0.571213	0.807593	1.11003	0.809386	0.92057		MMP1	0	-0.8079
										CXCL1AgedRZ	CXCL1	Aged	RZ	8.1948	0.172	20	47.63	<.0001	0.05	7.8359	8.5536		MMP3	11.7236	11.9601	11.3856	12.5581	13.6703	11.2523		MMP3	0	0.2365	-0.338	0.8345	1.9467	-0.4713		MMP3	1	0.848802	1.264	0.560777	0.259409	1.38636		MMP3	0	-0.2365
										CXCL1AgedScar	CXCL1	Aged	Scar	8.128	0.1664	20	48.85	<.0001	0.05	7.7809	8.4751		PINK1	5.0547	5.8606	6.0068	4.4748	4.695	5.8171		PINK1	0	0.8059	0.9521	-0.5799	-0.3597	0.7624		PINK1	1	0.572005	0.51688	1.49475	1.28316	0.589515		PINK1	0	-0.8059
										CXCL1YoungIBZ	CXCL1	Young	IBZ	8.9899	0.3256	20	27.61	<.0001	0.05	8.3107	9.6692		TIMP3	8.7965	9.0047	8.5294	8.3542	8.3509	8.1758		TIMP3	0	0.2082	-0.2671	-0.4423	-0.4456	-0.6207		TIMP3	1	0.865617	1.20339	1.35877	1.36188	1.53762		TIMP3	0	-0.2082
										CXCL1YoungRZ	CXCL1	Young	RZ	8.8838	0.2995	20	29.66	<.0001	0.05	8.2591	9.5085
										CXCL1YoungScar	CXCL1	Young	Scar	8.5295	0.2372	20	35.96	<.0001	0.05	8.0347	9.0243
										CXCL2AgedIBZ	CXCL2	Aged	IBZ	8.3746	0.2612	20	32.06	<.0001	0.05	7.8297	8.9195			Young	Young	Young	Aged	Aged	Aged			Young	Young	Young	Aged	Aged	Aged											Young	Young
										CXCL2AgedRZ	CXCL2	Aged	RZ	8.1435	0.1521	20	53.53	<.0001	0.05	7.8261	8.4609		Standard Error dCT	RZ	IBZ	Scar	RZ	IBZ	Scar		Standard Error ddCT	RZ	IBZ	Scar	RZ	IBZ	Scar										Standard Error ddCT	RZ	IBZ
										CXCL2AgedScar	CXCL2	Aged	Scar	7.5634	0.1207	20	62.65	<.0001	0.05	7.3116	7.8152		p16	0.2049	0.4988	0.4314	0.34	0.2611	0.3166		p16		0.539245	0.477588	0.396969	0.331899	0.37712										p16		0.539245
										CXCL2YoungIBZ	CXCL2	Young	IBZ	8.9624	0.2934	20	30.55	<.0001	0.05	8.3504	9.5744		p21	0.4427	0.9652	0.7718	0.3894	0.4699	0.2044		p21		1.06188	0.889752	0.589589	0.645592	0.487609										p21		1.06188
										CXCL2YoungRZ	CXCL2	Young	RZ	8.8376	0.3439	20	25.7	<.0001	0.05	8.1202	9.555		p53	0.05595	0.1637	0.1422	0.0713	0.09592	0.1223		p53		0.172997	0.152811	0.0906316	0.111045	0.13449										p53		0.172997
										CXCL2YoungScar	CXCL2	Young	Scar	8.5872	0.2041	20	42.07	<.0001	0.05	8.1614	9.0129		TGFB	0.4794	0.5753	0.513	0.1419	0.225	0.1493		TGFB		0.748862	0.702135	0.49996	0.529575	0.50211										TGFB		0.748862
										IL6AgedIBZ	IL6	Aged	IBZ	14.2856	0.4928	19	28.99	<.0001	0.05	13.2542	15.317		IL6	0.9609	0.6184	0.4561	1.2423	0.4928	0.8837		IL6		1.14269	1.06365	1.57055	1.0799	1.30547										IL6		1.14269
										IL6AgedRZ	IL6	Aged	RZ	13.0392	1.2423	19	10.5	<.0001	0.05	10.4391	15.6394		CCL2	0.4352	0.3683	0.3511	0.266	0.2454	0.1839		CCL2		0.570126	0.559169	0.510054	0.49962	0.47246										CCL2		0.570126
										IL6AgedScar	IL6	Aged	Scar	10.6839	0.8837	19	12.09	<.0001	0.05	8.8344	12.5334		CXCL2	0.3439	0.2934	0.2041	0.1521	0.2612	0.1207		CXCL2		0.452052	0.399905	0.376034	0.431848	0.364466										CXCL2		0.452052
										IL6YoungIBZ	IL6	Young	IBZ	12.6617	0.6184	19	20.48	<.0001	0.05	11.3674	13.956		MMP9	0.6319	0.7405	0.4837	1.3422	0.3675	0.8805		MMP9		0.973467	0.795778	1.48351	0.730995	1.08378										MMP9		0.973467
										IL6YoungRZ	IL6	Young	RZ	12.1495	0.9609	19	12.64	<.0001	0.05	10.1383	14.1606		TIMP1	0.2228	1.4995	0.5059	1.0982	0.3679	0.246		TIMP1		1.51596	0.552788	1.12057	0.430105	0.331897										TIMP1		1.51596
										IL6YoungScar	IL6	Young	Scar	12.3868	0.4561	19	27.16	<.0001	0.05	11.4322	13.3414		TIMP2	0.1423	0.2659	0.2492	0.1883	0.2224	0.3038		TIMP2		0.301583	0.286967	0.236022	0.264029	0.335475										TIMP2		0.301583
										MMP1AgedIBZ	MMP1	Aged	IBZ	9.3576	0.2464	19	37.98	<.0001	0.05	8.842	9.8732		ANF	1.0138	1.8297	0.6857	0.3043	1.4538	0.7357		ANF		2.09179	1.22392	1.05848	1.77238	1.25262										ANF		2.09179
										MMP1AgedRZ	MMP1	Aged	RZ	8.9019	0.3771	19	23.61	<.0001	0.05	8.1128	9.6911		CXCL1	0.2995	0.3256	0.2372	0.172	0.2311	0.1664		CXCL1		0.442398	0.382052	0.345376	0.378295	0.342621										CXCL1		0.442398
										MMP1AgedScar	MMP1	Aged	Scar	9.1719	0.206	19	44.52	<.0001	0.05	8.7408	9.6031		MMP1	0.343	0.1626	0.3944	0.3771	0.2464	0.206		MMP1		0.379589	0.522686	0.509758	0.422329	0.400106										MMP1		0.379589
										MMP1YoungIBZ	MMP1	Young	IBZ	9.8604	0.1626	19	60.65	<.0001	0.05	9.5201	10.2007		MMP3	0.6459	0.2052	0.8696	1.0614	0.649	0.5337		MMP3		0.677712	1.08323	1.24248	0.915635	0.837868										MMP3		0.677712
										MMP1YoungRZ	MMP1	Young	RZ	9.0525	0.343	19	26.39	<.0001	0.05	8.3347	9.7703		PINK1	0.2522	0.1051	0.2828	0.2083	0.2846	0.2742		PINK1		0.273223	0.37892	0.327099	0.380266	0.372546										PINK1		0.273223
										MMP1YoungScar	MMP1	Young	Scar	9.3608	0.3944	19	23.74	<.0001	0.05	8.5354	10.1862		TIMP3	0.2885	0.1684	0.2197	0.164	0.1347	0.1823		TIMP3		0.334052	0.36263	0.331856	0.318397	0.34127										TIMP3		0.334052
										MMP3AgedIBZ	MMP3	Aged	IBZ	13.6703	0.649	19	21.06	<.0001	0.05	12.3119	15.0287
										MMP3AgedRZ	MMP3	Aged	RZ	12.5581	1.0614	19	11.83	<.0001	0.05	10.3366	14.7795
										MMP3AgedScar	MMP3	Aged	Scar	11.2523	0.5337	19	21.08	<.0001	0.05	10.1353	12.3694
										MMP3YoungIBZ	MMP3	Young	IBZ	11.9601	0.2052	19	58.27	<.0001	0.05	11.5305	12.3897
										MMP3YoungRZ	MMP3	Young	RZ	11.7236	0.6459	19	18.15	<.0001	0.05	10.3716	13.0755
										MMP3YoungScar	MMP3	Young	Scar	11.3856	0.8696	19	13.09	<.0001	0.05	9.5655	13.2057
										MMP9AgedIBZ	MMP9	Aged	IBZ	14.0878	0.3675	19	38.34	<.0001	0.05	13.3187	14.857
										MMP9AgedRZ	MMP9	Aged	RZ	12.5354	1.3422	19	9.34	<.0001	0.05	9.7261	15.3448
										MMP9AgedScar	MMP9	Aged	Scar	11.8541	0.8805	19	13.46	<.0001	0.05	10.0111	13.697
										MMP9YoungIBZ	MMP9	Young	IBZ	15.6485	0.7405	19	21.13	<.0001	0.05	14.0985	17.1985
										MMP9YoungRZ	MMP9	Young	RZ	14.6948	0.6319	19	23.25	<.0001	0.05	13.3721	16.0174
										MMP9YoungScar	MMP9	Young	Scar	13.3468	0.4837	19	27.59	<.0001	0.05	12.3343	14.3592
										PINK1AgedIBZ	PINK1	Aged	IBZ	4.695	0.2846	19	16.5	<.0001	0.05	4.0994	5.2906
										PINK1AgedRZ	PINK1	Aged	RZ	4.4748	0.2083	19	21.48	<.0001	0.05	4.0388	4.9109
										PINK1AgedScar	PINK1	Aged	Scar	5.8171	0.2742	19	21.21	<.0001	0.05	5.2431	6.3911
										PINK1YoungIBZ	PINK1	Young	IBZ	5.8606	0.1051	19	55.78	<.0001	0.05	5.6407	6.0805
										PINK1YoungRZ	PINK1	Young	RZ	5.0547	0.2522	19	20.05	<.0001	0.05	4.527	5.5825
										PINK1YoungScar	PINK1	Young	Scar	6.0068	0.2828	19	21.24	<.0001	0.05	5.4149	6.5986
										TGFBAgedIBZ	TGFB	Aged	IBZ	7.1196	0.225	20	31.64	<.0001	0.05	6.6502	7.589
										TGFBAgedRZ	TGFB	Aged	RZ	6.8284	0.1419	20	48.12	<.0001	0.05	6.5324	7.1244
										TGFBAgedScar	TGFB	Aged	Scar	5.4374	0.1493	20	36.42	<.0001	0.05	5.126	5.7489
										TGFBYoungIBZ	TGFB	Young	IBZ	7.0055	0.5753	20	12.18	<.0001	0.05	5.8054	8.2056
										TGFBYoungRZ	TGFB	Young	RZ	7.0398	0.4794	20	14.69	<.0001	0.05	6.0399	8.0398
										TGFBYoungScar	TGFB	Young	Scar	6.1478	0.513	20	11.98	<.0001	0.05	5.0777	7.2178
										TIMP1AgedIBZ	TIMP1	Aged	IBZ	8.064	0.3679	19	21.92	<.0001	0.05	7.294	8.834
										TIMP1AgedRZ	TIMP1	Aged	RZ	7.4013	1.0982	19	6.74	<.0001	0.05	5.1028	9.6997
										TIMP1AgedScar	TIMP1	Aged	Scar	5.9063	0.246	19	24.01	<.0001	0.05	5.3914	6.4211
										TIMP1YoungIBZ	TIMP1	Young	IBZ	7.5168	1.4995	19	5.01	<.0001	0.05	4.3784	10.6552
										TIMP1YoungRZ	TIMP1	Young	RZ	9.4958	0.2228	19	42.62	<.0001	0.05	9.0295	9.9622
										TIMP1YoungScar	TIMP1	Young	Scar	6.9295	0.5059	19	13.7	<.0001	0.05	5.8706	7.9884
										TIMP2AgedIBZ	TIMP2	Aged	IBZ	4.5313	0.2224	19	20.37	<.0001	0.05	4.0657	4.9968
										TIMP2AgedRZ	TIMP2	Aged	RZ	4.9922	0.1883	19	26.52	<.0001	0.05	4.5981	5.3862
										TIMP2AgedScar	TIMP2	Aged	Scar	2.8224	0.3038	19	9.29	<.0001	0.05	2.1866	3.4582
										TIMP2YoungIBZ	TIMP2	Young	IBZ	4.8984	0.2659	19	18.42	<.0001	0.05	4.3419	5.4549
										TIMP2YoungRZ	TIMP2	Young	RZ	5.3745	0.1423	19	37.76	<.0001	0.05	5.0766	5.6724
										TIMP2YoungScar	TIMP2	Young	Scar	3.8916	0.2492	19	15.62	<.0001	0.05	3.3701	4.4132
										TIMP3AgedIBZ	TIMP3	Aged	IBZ	8.3509	0.1347	19	62	<.0001	0.05	8.069	8.6329
										TIMP3AgedRZ	TIMP3	Aged	RZ	8.3542	0.164	19	50.94	<.0001	0.05	8.0109	8.6974
										TIMP3AgedScar	TIMP3	Aged	Scar	8.1758	0.1823	19	44.85	<.0001	0.05	7.7943	8.5573
										TIMP3YoungIBZ	TIMP3	Young	IBZ	9.0047	0.1684	19	53.48	<.0001	0.05	8.6523	9.3572
										TIMP3YoungRZ	TIMP3	Young	RZ	8.7965	0.2885	19	30.49	<.0001	0.05	8.1926	9.4004
										TIMP3YoungScar	TIMP3	Young	Scar	8.5294	0.2197	19	38.82	<.0001	0.05	8.0696	8.9892
										p16AgedIBZ	p16	Aged	IBZ	8.3154	0.2611	21	31.85	<.0001	0.05	7.7725	8.8583
										p16AgedRZ	p16	Aged	RZ	8.8794	0.34	21	26.11	<.0001	0.05	8.1723	9.5865
										p16AgedScar	p16	Aged	Scar	7.099	0.3166	21	22.42	<.0001	0.05	6.4406	7.7574
										p16YoungIBZ	p16	Young	IBZ	10.8789	0.4988	21	21.81	<.0001	0.05	9.8416	11.9162
										p16YoungRZ	p16	Young	RZ	11.8237	0.2049	21	57.7	<.0001	0.05	11.3976	12.2498
										p16YoungScar	p16	Young	Scar	9.7169	0.4314	21	22.52	<.0001	0.05	8.8197	10.6141
										p21AgedIBZ	p21	Aged	IBZ	10.8638	0.4699	21	23.12	<.0001	0.05	9.8865	11.841
										p21AgedRZ	p21	Aged	RZ	11.7356	0.3894	21	30.14	<.0001	0.05	10.9257	12.5454
										p21AgedScar	p21	Aged	Scar	9.0392	0.2044	21	44.21	<.0001	0.05	8.614	9.4643
										p21YoungIBZ	p21	Young	IBZ	11.9074	0.9652	21	12.34	<.0001	0.05	9.9001	13.9147
										p21YoungRZ	p21	Young	RZ	12.9414	0.4427	21	29.23	<.0001	0.05	12.0206	13.8621
										p21YoungScar	p21	Young	Scar	11.1155	0.7718	21	14.4	<.0001	0.05	9.5104	12.7206
										p53AgedIBZ	p53	Aged	IBZ	4.6296	0.09592	21	48.27	<.0001	0.05	4.4301	4.8291
										p53AgedRZ	p53	Aged	RZ	4.7121	0.0713	21	66.09	<.0001	0.05	4.5638	4.8604
										p53AgedScar	p53	Aged	Scar	4.0598	0.1223	21	33.19	<.0001	0.05	3.8054	4.3141
										p53YoungIBZ	p53	Young	IBZ	5.0177	0.1637	21	30.65	<.0001	0.05	4.6773	5.3581
										p53YoungRZ	p53	Young	RZ	4.8747	0.05595	21	87.13	<.0001	0.05	4.7584	4.9911
										p53YoungScar	p53	Young	Scar	4.5164	0.1422	21	31.75	<.0001	0.05	4.2206	4.8122
[truncated: 11 more columns]
