# Supplementary material for: Myofibroblast senescence promotes arrhythmogenic remodeling in the aged infarcted rabbit heart
Source: eLife. 2023 May 19;12:e84088. doi: 10.7554/eLife.84088 (PMC10259375; doi:10.7554/eLife.84088)
Supplement: Figure 5—source data 1. [file elife-84088-fig5-data1.xlsx]

## Sheet: Panel C
	DECONVOLUTION						>2 foci	>2 foci	≤2 foci	≤2 foci
Stain	Filename	Sample Identifier	Sample ID	Replicate	Lineage- gH2AX-	Lineage+ gH2AX-	Lineage- gH2AX+	Lineage+ gH2AX+	Lineage- gH2AX sub	Lineage+ gH2AX sub	# gH2AX+	# aSMA+	# vWF+	# CD68+	# gH2AX+ aSMA+	# gH2AX+ vWF+	# gH2AX+ CD68+	Total # Nuclei	% gH2AX+	% Lineage+	% of Lineage+ that are gH2AX+	% of gH2AX+ that are Lineage+	# gH2AX+	# Lineage+	Verdict			Filename	Sample ID	# gH2AX foci aSMA-	# gH2AX foci aSMA+
aSMA_gH2AX	2021_01_28 Slide348 MUSC8 IBZ aSMA_gH2AX 60x Scar 1 arrows	1	MUSC8 IBZ	1	5	26	2	1	6	4	3	31			1			44	6.81818	70.4545	3.22581	33.3333	3	31	2021_01_28 Analyzed			MUSC8 IBZ	2021_01_28 Slide348 MUSC8 IBZ aSMA_gH2AX 60x Scar 1 arrows	1	1
aSMA_gH2AX	2021_01_28 Slide348 MUSC8 IBZ aSMA_gH2AX 60x Scar 2 arrows	1	MUSC8 IBZ	2	8	16	3	0	1	0	3	16			0			28	10.7143	57.1429	0	0	3	16	2021_01_28 Analyzed			MUSC8 IBZ	2021_01_28 Slide348 MUSC8 IBZ aSMA_gH2AX 60x Scar 1 arrows	1	1
aSMA_gH2AX	2021_01_28 Slide348 MUSC8 IBZ aSMA_gH2AX 60x Scar 3 arrows	1	MUSC8 IBZ	3	18	32	0	2	2	2	2	36			2			56	3.57143	64.2857	5.55556	100	2	36	2021_01_28 Analyzed			MUSC8 IBZ	2021_01_28 Slide348 MUSC8 IBZ aSMA_gH2AX 60x Scar 1 arrows	1
aSMA_gH2AX	2021_01_28 Slide348 MUSC8 IBZ aSMA_gH2AX 60x Scar 4 arrows	1	MUSC8 IBZ	4	6	47	0	0	1	1	0	48			0			55	0	87.2727	0		0	48	2021_01_28 Analyzed			MUSC8 IBZ	2021_01_28 Slide348 MUSC8 IBZ aSMA_gH2AX 60x Scar 1 arrows	4
aSMA_gH2AX	2021_01_28 Slide348 MUSC8 IBZ aSMA_gH2AX 60x Scar 45 arrows	1	MUSC8 IBZ	5	8	93	0	0	0	5	0	98			0			106	0	92.4528	0		0	98	2021_01_28 Analyzed			MUSC8 IBZ	2021_01_28 Slide348 MUSC8 IBZ aSMA_gH2AX 60x Scar 1 arrows	1	2
vWF_gH2AX	2021_01_28 Slide349 MUSC8 IBZ vWF_gH2AX 60x Scar 1 arrows	1	MUSC8 IBZ	1	37	10	7	3	7	0	10		13			3		64	15.625	20.3125	23.0769	30	10	13	2021_01_28 Analyzed			MUSC8 IBZ	2021_01_28 Slide348 MUSC8 IBZ aSMA_gH2AX 60x Scar 1 arrows	2	2
vWF_gH2AX	2021_01_28 Slide349 MUSC8 IBZ vWF_gH2AX 60x Scar 2 arrows	1	MUSC8 IBZ	2	24	6	1	0	4	2	1		8			0		37	2.7027	21.6216	0	0	1	8	2021_01_28 Analyzed			MUSC8 IBZ	2021_01_28 Slide348 MUSC8 IBZ aSMA_gH2AX 60x Scar 1 arrows	3	3
vWF_gH2AX	2021_01_28 Slide349 MUSC8 IBZ vWF_gH2AX 60x Scar 3 arrows	1	MUSC8 IBZ	3	20	41	0	0	3	5	0		46			0		69	0	66.6667	0		0	46	2021_01_28 Analyzed			MUSC8 IBZ	2021_01_28 Slide348 MUSC8 IBZ aSMA_gH2AX 60x Scar 1 arrows	1
vWF_gH2AX	2021_01_28 Slide349 MUSC8 IBZ vWF_gH2AX 60x Scar 4 arrows	1	MUSC8 IBZ	4	58	12	2	1	15	1	3		14			1		89	3.37079	15.7303	7.14286	33.3333	3	14	2021_01_28 Analyzed			MUSC8 IBZ	2021_01_28 Slide348 MUSC8 IBZ aSMA_gH2AX 60x Scar 2 arrows	1
vWF_gH2AX	2021_01_28 Slide349 MUSC8 IBZ vWF_gH2AX 60x Scar 5 arrows	1	MUSC8 IBZ	5	67	8	4	0	4	0	4		8			0		83	4.81928	9.63855	0	0	4	8	2021_01_28 Analyzed			MUSC8 IBZ	2021_01_28 Slide348 MUSC8 IBZ aSMA_gH2AX 60x Scar 2 arrows	3
CD68_gH2AX	2021_03_02 MUSC8 IBZ CD68_gH2AX 60x Scar 1 arrows	1	MUSC8 IBZ	1	58	1	0	0	5	0	0			1			0	64	0	1.5625	0		0	1	2021_03_02 Analyzed			MUSC8 IBZ	2021_01_28 Slide348 MUSC8 IBZ aSMA_gH2AX 60x Scar 2 arrows	3
CD68_gH2AX	2021_03_02 MUSC8 IBZ CD68_gH2AX 60x Scar 2 arrows	1	MUSC8 IBZ	2	45	4	0	1	5	0	1			5			1	55	1.81818	9.09091	20	100	1	5	2021_03_02 Analyzed			MUSC8 IBZ	2021_01_28 Slide348 MUSC8 IBZ aSMA_gH2AX 60x Scar 2 arrows	5
CD68_gH2AX	2021_03_02 MUSC8 IBZ CD68_gH2AX 60x Scar 3 arrows	1	MUSC8 IBZ	3	38	2	0	1	1	1	1			4			1	43	2.32558	9.30233	25	100	1	4	2021_03_02 Analyzed			MUSC8 IBZ	2021_01_28 Slide348 MUSC8 IBZ aSMA_gH2AX 60x Scar 3 arrows	1	4
CD68_gH2AX	2021_03_02 MUSC8 IBZ CD68_gH2AX 60x Scar 4 arrows	1	MUSC8 IBZ	4							0			0			0											MUSC8 IBZ	2021_01_28 Slide348 MUSC8 IBZ aSMA_gH2AX 60x Scar 3 arrows	1	1
CD68_gH2AX	2021_03_02 MUSC8 IBZ CD68_gH2AX 60x Scar 5 arrows	1	MUSC8 IBZ	5	43	2	2	0	12	0	2			2			0	59	3.38983	3.38983	0	0	2	2	2021_03_02 Analyzed			MUSC8 IBZ	2021_01_28 Slide348 MUSC8 IBZ aSMA_gH2AX 60x Scar 3 arrows		3
aSMA_gH2AX	2021_01_28 Slide351 MUS41 IBZ aSMA_gH2AX 60x Scar 1 arrows	2	MUSC41 IBZ	1	32	7	2	2	5	0	4	9			2			48	8.33333	18.75	22.2222	50	4	9	2021_01_28 Analyzed			MUSC8 IBZ	2021_01_28 Slide348 MUSC8 IBZ aSMA_gH2AX 60x Scar 3 arrows		2
aSMA_gH2AX	2021_01_28 Slide351 MUS41 IBZ aSMA_gH2AX 60x Scar 2 arrows	2	MUSC41 IBZ	2	30	10	0	1	0	3	1	14			1			44	2.27273	31.8182	7.14286	100	1	14	2021_01_28 Analyzed			MUSC8 IBZ	2021_01_28 Slide348 MUSC8 IBZ aSMA_gH2AX 60x Scar 4 arrows	2	1
aSMA_gH2AX	2021_01_28 Slide351 MUS41 IBZ aSMA_gH2AX 60x Scar 3 arows	2	MUSC41 IBZ	3	47	13	2	1	0	0	3	14			1			63	4.7619	22.2222	7.14286	33.3333	3	14	2021_01_28 Analyzed			MUSC8 IBZ	2021_01_28 Slide348 MUSC8 IBZ aSMA_gH2AX 60x Scar 45 arrows		1
aSMA_gH2AX	2021_01_28 Slide351 MUS41 IBZ aSMA_gH2AX 60x Scar 4 arrows	2	MUSC41 IBZ	4	40	7	0	0	0	0	0	7			0			47	0	14.8936	0		0	7	2021_01_28 Analyzed			MUSC8 IBZ	2021_01_28 Slide348 MUSC8 IBZ aSMA_gH2AX 60x Scar 45 arrows		1
aSMA_gH2AX	2021_01_28 Slide351 MUS41 IBZ aSMA_gH2AX 60x Scar 5 arrows	2	MUSC41 IBZ	5	42	0	2	0	0	0	2	0			0			44	4.54545	0	#DIV/0!	0	2	0	2021_01_28 Analyzed			MUSC8 IBZ	2021_01_28 Slide348 MUSC8 IBZ aSMA_gH2AX 60x Scar 45 arrows		1
vWF_gH2AX	2021_01_28 Slide352 MUS41 IBZ vWF_gH2AX 60x Scar 1 arrows	2	MUSC41 IBZ	1	35	27	1	1	4	1	2		29			1		69	2.89855	42.029	3.44828	50	2	29	2021_01_28 Analyzed			MUSC8 IBZ	2021_01_28 Slide348 MUSC8 IBZ aSMA_gH2AX 60x Scar 45 arrows		1
vWF_gH2AX	2021_01_28 Slide352 MUS41 IBZ vWF_gH2AX 60x Scar 2 arrows	2	MUSC41 IBZ	2	37	6	3	1	0	1	4		8			1		48	8.33333	16.6667	12.5	25	4	8	2021_01_28 Analyzed			MUSC8 IBZ	2021_01_28 Slide348 MUSC8 IBZ aSMA_gH2AX 60x Scar 45 arrows		1
vWF_gH2AX	2021_01_28 Slide352 MUS41 IBZ vWF_gH2AX 60x Scar 3 arrows	2	MUSC41 IBZ	3	52	10	0	0	0	0	0		10			0		62	0	16.129	0		0	10	2021_01_28 Analyzed			MUSC41 IBZ	2021_01_28 Slide351 MUS41 IBZ aSMA_gH2AX 60x Scar 1 arrows	1
vWF_gH2AX	2021_01_28 Slide352 MUS41 IBZ vWF_gH2AX 60x Scar 4 arrows	2	MUSC41 IBZ	4	34	16	1	1	0	1	2		18			1		53	3.77358	33.9623	5.55556	50	2	18	2021_01_28 Analyzed			MUSC41 IBZ	2021_01_28 Slide351 MUS41 IBZ aSMA_gH2AX 60x Scar 1 arrows	1
vWF_gH2AX	2021_01_28 Slide352 MUS41 IBZ vWF_gH2AX 60x Scar 5 arrows	2	MUSC41 IBZ	5	23	11	0	1	2	2	1		14			1		39	2.5641	35.8974	7.14286	100	1	14	2021_01_28 Analyzed			MUSC41 IBZ	2021_01_28 Slide351 MUS41 IBZ aSMA_gH2AX 60x Scar 1 arrows	2
CD68_gH2AX	2021_03_02 MUSC41 IBZ CD68_gH2AX 60x Scar 1 arrows	2	MUSC41 IBZ	1	53	0	1	0	4	1	1			1			0	59	1.69492	1.69492	0	0	1	1	2021_03_02 Analyzed			MUSC41 IBZ	2021_01_28 Slide351 MUS41 IBZ aSMA_gH2AX 60x Scar 1 arrows	1
CD68_gH2AX	2021_03_02 MUSC41 IBZ CD68_gH2AX 60x Scar 2 arrows	2	MUSC41 IBZ	2	82	2	1	1	5	0	2			3			1	91	2.1978	3.2967	33.3333	50	2	3	2021_03_02 Analyzed			MUSC41 IBZ	2021_01_28 Slide351 MUS41 IBZ aSMA_gH2AX 60x Scar 1 arrows	4
CD68_gH2AX	2021_03_02 MUSC41 IBZ CD68_gH2AX 60x Scar 3 arrows	2	MUSC41 IBZ	3	37	2	0	0	7	0	0			2			0	46	0	4.34783	0		0	2	2021_03_02 Analyzed			MUSC41 IBZ	2021_01_28 Slide351 MUS41 IBZ aSMA_gH2AX 60x Scar 1 arrows	2
CD68_gH2AX	2021_03_02 MUSC41 IBZ CD68_gH2AX 60x Scar 4 arrows	2	MUSC41 IBZ	4	25	2	2	3	8	1	5			6			3	41	12.1951	14.6341	50	60	5	6	2021_03_02 Analyzed			MUSC41 IBZ	2021_01_28 Slide351 MUS41 IBZ aSMA_gH2AX 60x Scar 1 arrows	3	4
CD68_gH2AX	2021_03_02 MUSC41 IBZ CD68_gH2AX 60x Scar 5 arrows	2	MUSC41 IBZ	5	27	3	0	0	5	1	0			4			0	36	0	11.1111	0		0	4	2021_03_02 Analyzed			MUSC41 IBZ	2021_01_28 Slide351 MUS41 IBZ aSMA_gH2AX 60x Scar 1 arrows		4
aSMA_gH2AX	2021_01_28 Slide354 MUSC15 Scar aSMA_gH2AX 60x Scar 1 arrows	3	MUSC15 Scar	1	4	17	0	2	0	6	2	25			2			29	6.89655	86.2069	8	100	2	25	2021_01_28 Analyzed			MUSC41 IBZ	2021_01_28 Slide351 MUS41 IBZ aSMA_gH2AX 60x Scar 2 arrows		2
aSMA_gH2AX	2021_01_28 Slide354 MUSC15 Scar aSMA_gH2AX 60x Scar 2 arrows	3	MUSC15 Scar	2	3	15	0	4	2	3	4	22			4			27	14.8148	81.4815	18.1818	100	4	22	2021_01_28 Analyzed			MUSC41 IBZ	2021_01_28 Slide351 MUS41 IBZ aSMA_gH2AX 60x Scar 2 arrows		3
aSMA_gH2AX	2021_01_28 Slide354 MUSC15 Scar aSMA_gH2AX 60x Scar 3 arrows	3	MUSC15 Scar	3	7	11	1	2	1	6	3	19			2			28	10.7143	67.8571	10.5263	66.6667	3	19	2021_01_28 Analyzed			MUSC41 IBZ	2021_01_28 Slide351 MUS41 IBZ aSMA_gH2AX 60x Scar 2 arrows		1
aSMA_gH2AX	2021_01_28 Slide354 MUSC15 Scar aSMA_gH2AX 60x Scar 4 arrows	3	MUSC15 Scar	4	12	21	0	2	3	2	2	25			2			40	5	62.5	8	100	2	25	2021_01_28 Analyzed			MUSC41 IBZ	2021_01_28 Slide351 MUS41 IBZ aSMA_gH2AX 60x Scar 2 arrows		1
aSMA_gH2AX	2021_01_28 Slide354 MUSC15 Scar aSMA_gH2AX 60x Scar 5 arrow	3	MUSC15 Scar	5	19	35	2	4	7	2	6	41			4			69	8.69565	59.4203	9.7561	66.6667	6	41	2021_01_28 Analyzed			MUSC41 IBZ	2021_01_28 Slide351 MUS41 IBZ aSMA_gH2AX 60x Scar 3 arows	4
vWF_gH2AX	2021_01_28 Slide355 MUSC15 Scar vWF_gH2AX 60x Scar 1 arrows	3	MUSC15 Scar	1	22	5	1	0	11	0	1		5			0		39	2.5641	12.8205	0	0	1	5	2021_01_28 Analyzed			MUSC41 IBZ	2021_01_28 Slide351 MUS41 IBZ aSMA_gH2AX 60x Scar 3 arows	3
vWF_gH2AX	2021_01_28 Slide355 MUSC15 Scar vWF_gH2AX 60x Scar 2 arrows	3	MUSC15 Scar	2	56	2	2	1	3	0	3		3			1		64	4.6875	4.6875	33.3333	33.3333	3	3	2021_01_28 Analyzed			MUSC41 IBZ	2021_01_28 Slide351 MUS41 IBZ aSMA_gH2AX 60x Scar 3 arows		4
vWF_gH2AX	2021_01_28 Slide355 MUSC15 Scar vWF_gH2AX 60x Scar 3 arrows	3	MUSC15 Scar	3	34	0	4	0	9	0	4		0			0		47	8.51064	0	#DIV/0!	0	4	0	2021_01_28 Analyzed			MUSC41 IBZ	2021_01_28 Slide351 MUS41 IBZ aSMA_gH2AX 60x Scar 4 arrows
vWF_gH2AX	2021_01_28 Slide355 MUSC15 Scar vWF_gH2AX 60x Scar 4 arrows	3	MUSC15 Scar	4	32	2	5	1	0	1	6		4			1		41	14.6341	9.7561	25	16.6667	6	4	2021_01_28 Analyzed			MUSC41 IBZ	2021_01_28 Slide351 MUS41 IBZ aSMA_gH2AX 60x Scar 5 arrows	3
vWF_gH2AX	2021_01_28 Slide355 MUSC15 Scar vWF_gH2AX 60x Scar 5 arrows	3	MUSC15 Scar	5	64	5	2	0	5	0	2		5			0		76	2.63158	6.57895	0	0	2	5	2021_01_28 Analyzed			MUSC41 IBZ	2021_01_28 Slide351 MUS41 IBZ aSMA_gH2AX 60x Scar 5 arrows	4
CD68_gH2AX	2021_03_02 MUSC15 Scar CD68_gH2AX 60x Scar 1 arrows	3	MUSC15 Scar	1	16	15	32	14	12	7	46			36			14	96	47.9167	37.5	38.8889	30.4348	46	36	2021_03_02 Analyzed			MUSC15 Scar	2021_01_28 Slide354 MUSC15 Scar aSMA_gH2AX 60x Scar 1 arrows		10
CD68_gH2AX	2021_03_02 MUSC15 Scar CD68_gH2AX 60x Scar 2 arrows	3	MUSC15 Scar	2	9	38	22	20	13	16	42			74			20	118	35.5932	62.7119	27.027	47.619	42	74	2021_03_02 Analyzed			MUSC15 Scar	2021_01_28 Slide354 MUSC15 Scar aSMA_gH2AX 60x Scar 1 arrows		6
CD68_gH2AX	2021_03_02 MUSC15 Scar CD68_gH2AX 60x Scar 3 arrows	3	MUSC15 Scar	3	18	25	5	13	6	5	18			43			13	72	25	59.7222	30.2326	72.2222	18	43	2021_03_02 Analyzed			MUSC15 Scar	2021_01_28 Slide354 MUSC15 Scar aSMA_gH2AX 60x Scar 1 arrows		2
CD68_gH2AX	2021_03_02 MUSC15 Scar CD68_gH2AX 60x Scar 4 arrows	3	MUSC15 Scar	4	16	5	8	0	12	3	8			8			0	44	18.1818	18.1818	0	0	8	8	2021_03_02 Analyzed			MUSC15 Scar	2021_01_28 Slide354 MUSC15 Scar aSMA_gH2AX 60x Scar 1 arrows		2
CD68_gH2AX	2021_03_02 MUSC15 Scar CD68_gH2AX 60x Scar 5 arrows	3	MUSC15 Scar	5	7	17	1	0	4	2	1			19			0	31	3.22581	61.2903	0	0	1	19	2021_03_02 Analyzed			MUSC15 Scar	2021_01_28 Slide354 MUSC15 Scar aSMA_gH2AX 60x Scar 1 arrows		1
aSMA_gH2AX	2021_01_17 Slide330 MUSC3 Scar aSMA_gH2AX 60x Scar 1 arrows	4	MUSC3 Scar	1	4	10	0	3	4	2	3	15			3			23	13.0435	65.2174	20	100	3	15	2021_01_17 Analyzed			MUSC15 Scar	2021_01_28 Slide354 MUSC15 Scar aSMA_gH2AX 60x Scar 1 arrows		2
aSMA_gH2AX	2021_01_17 Slide330 MUSC3 Scar aSMA_gH2AX 60x Scar 2 arrows	4	MUSC3 Scar	2	4	28	0	6	0	5	6	39			6			43	13.9535	90.6977	15.3846	100	6	39	2021_01_17 Analyzed			MUSC15 Scar	2021_01_28 Slide354 MUSC15 Scar aSMA_gH2AX 60x Scar 1 arrows		1
aSMA_gH2AX	2021_01_17 Slide330 MUSC3 Scar aSMA_gH2AX 60x Scar 4 arrows	4	MUSC3 Scar	3	3	39	0	11	0	19	11	69			11			72	15.2778	95.8333	15.942	100	11	69	2021_01_17 Analyzed			MUSC15 Scar	2021_01_28 Slide354 MUSC15 Scar aSMA_gH2AX 60x Scar 1 arrows		2
vWF_gH2AX	2021_02_07 Slide329 MUSC3 Scar vWF_gH2AX 60x Scar 1 arrows	4	MUSC3 Scar	1	10	0	1	0	6	0	1		0			0		17	5.88235	0	#DIV/0!	0	1	0	2021_02_07 Analyzed			MUSC15 Scar	2021_01_28 Slide354 MUSC15 Scar aSMA_gH2AX 60x Scar 2 arrows	1	3
vWF_gH2AX	2021_02_07 Slide329 MUSC3 Scar vWF_gH2AX 60x Scar 2 arrows	4	MUSC3 Scar	2	23	5	0	0	2	0	0		5			0		30	0	16.6667	0		0	5	2021_02_07 Analyzed			MUSC15 Scar	2021_01_28 Slide354 MUSC15 Scar aSMA_gH2AX 60x Scar 2 arrows		5
vWF_gH2AX	2021_02_07 Slide329 MUSC3 Scar vWF_gH2AX 60x Scar 3 arrows	4	MUSC3 Scar	3	14	0	0	0	0	0	0		0			0		14	0	0	#DIV/0!		0	0	2021_02_07 Analyzed			MUSC15 Scar	2021_01_28 Slide354 MUSC15 Scar aSMA_gH2AX 60x Scar 2 arrows		6
vWF_gH2AX	2021_02_07 Slide329 MUSC3 Scar vWF_gH2AX 60x Scar 4 arrows	4	MUSC3 Scar	4	11	1	0	0	0	0	0		1			0		12	0	8.33333	0		0	1	2021_02_07 Analyzed			MUSC15 Scar	2021_01_28 Slide354 MUSC15 Scar aSMA_gH2AX 60x Scar 2 arrows		1
vWF_gH2AX	2021_02_07 Slide329 MUSC3 Scar vWF_gH2AX 60x Scar 5 arrows	4	MUSC3 Scar	5	10	1	0	0	0	0	0		1			0		11	0	9.09091	0		0	1	2021_02_07 Analyzed			MUSC15 Scar	2021_01_28 Slide354 MUSC15 Scar aSMA_gH2AX 60x Scar 2 arrows		1
CD68_gH2AX	2021_03_02 MUSC3 Scar CD68_gH2AX 60x Scar 1 arrows	4	MUSC3 Scar	1	52	6	1	1	0	0	2			7			1	60	3.33333	11.6667	14.2857	50	2	7	2021_03_02 Analyzed			MUSC15 Scar	2021_01_28 Slide354 MUSC15 Scar aSMA_gH2AX 60x Scar 2 arrows	2	1
CD68_gH2AX	2021_03_02 MUSC3 Scar CD68_gH2AX 60x Scar 2 arrows	4	MUSC3 Scar	2	29	5	0	0	2	1	0			6			0	37	0	16.2162	0		0	6	2021_03_02 Analyzed			MUSC15 Scar	2021_01_28 Slide354 MUSC15 Scar aSMA_gH2AX 60x Scar 2 arrows		3
CD68_gH2AX	2021_03_02 MUSC3 Scar CD68_gH2AX 60x Scar 3 arrows	4	MUSC3 Scar	3	28	9	4	1	2	4	5			14			1	48	10.4167	29.1667	7.14286	20	5	14	2021_03_02 Analyzed			MUSC15 Scar	2021_01_28 Slide354 MUSC15 Scar aSMA_gH2AX 60x Scar 3 arrows	6	2
CD68_gH2AX	2021_03_02 MUSC3 Scar CD68_gH2AX 60x Scar 4 arrows	4	MUSC3 Scar	4	16	4	14	8	6	1	22			13			8	49	44.898	26.5306	61.5385	36.3636	22	13	2021_03_02 Analyzed			MUSC15 Scar	2021_01_28 Slide354 MUSC15 Scar aSMA_gH2AX 60x Scar 3 arrows		1
CD68_gH2AX	2021_03_02 MUSC3 Scar CD68_gH2AX 60x Scar 5 arrows	4	MUSC3 Scar	5	19	13	5	2	10	0	7			15			2	49	14.2857	30.6122	13.3333	28.5714	7	15	2021_03_02 Analyzed			MUSC15 Scar	2021_01_28 Slide354 MUSC15 Scar aSMA_gH2AX 60x Scar 3 arrows		2
																												MUSC15 Scar	2021_01_28 Slide354 MUSC15 Scar aSMA_gH2AX 60x Scar 3 arrows		5
																												MUSC15 Scar	2021_01_28 Slide354 MUSC15 Scar aSMA_gH2AX 60x Scar 3 arrows		2
																												MUSC15 Scar	2021_01_28 Slide354 MUSC15 Scar aSMA_gH2AX 60x Scar 3 arrows		3
																												MUSC15 Scar	2021_01_28 Slide354 MUSC15 Scar aSMA_gH2AX 60x Scar 3 arrows	1	2
																												MUSC15 Scar	2021_01_28 Slide354 MUSC15 Scar aSMA_gH2AX 60x Scar 3 arrows		2
																												MUSC15 Scar	2021_01_28 Slide354 MUSC15 Scar aSMA_gH2AX 60x Scar 4 arrows		5
																												MUSC15 Scar	2021_01_28 Slide354 MUSC15 Scar aSMA_gH2AX 60x Scar 4 arrows	2	4
																												MUSC15 Scar	2021_01_28 Slide354 MUSC15 Scar aSMA_gH2AX 60x Scar 4 arrows	1	1
																												MUSC15 Scar	2021_01_28 Slide354 MUSC15 Scar aSMA_gH2AX 60x Scar 4 arrows	2	2
																												MUSC15 Scar	2021_01_28 Slide354 MUSC15 Scar aSMA_gH2AX 60x Scar 5 arrow		5
																												MUSC15 Scar	2021_01_28 Slide354 MUSC15 Scar aSMA_gH2AX 60x Scar 5 arrow		3
																												MUSC15 Scar	2021_01_28 Slide354 MUSC15 Scar aSMA_gH2AX 60x Scar 5 arrow	1	1
																												MUSC15 Scar	2021_01_28 Slide354 MUSC15 Scar aSMA_gH2AX 60x Scar 5 arrow		5
																												MUSC15 Scar	2021_01_28 Slide354 MUSC15 Scar aSMA_gH2AX 60x Scar 5 arrow	1	2
																												MUSC15 Scar	2021_01_28 Slide354 MUSC15 Scar aSMA_gH2AX 60x Scar 5 arrow	3
																												MUSC15 Scar	2021_01_28 Slide354 MUSC15 Scar aSMA_gH2AX 60x Scar 5 arrow	1
																												MUSC15 Scar	2021_01_28 Slide354 MUSC15 Scar aSMA_gH2AX 60x Scar 5 arrow	1
																												MUSC15 Scar	2021_01_28 Slide354 MUSC15 Scar aSMA_gH2AX 60x Scar 5 arrow	3
																												MUSC15 Scar	2021_01_28 Slide354 MUSC15 Scar aSMA_gH2AX 60x Scar 5 arrow	1
																												MUSC15 Scar	2021_01_28 Slide354 MUSC15 Scar aSMA_gH2AX 60x Scar 5 arrow	2
																												MUSC15 Scar	2021_01_28 Slide354 MUSC15 Scar aSMA_gH2AX 60x Scar 5 arrow	1	3
																												MUSC3 Scar	2021_01_17 Slide330 MUSC3 Scar aSMA_gH2AX 60x Scar 1 arrows	1	3
																												MUSC3 Scar	2021_01_17 Slide330 MUSC3 Scar aSMA_gH2AX 60x Scar 1 arrows	1	2
																												MUSC3 Scar	2021_01_17 Slide330 MUSC3 Scar aSMA_gH2AX 60x Scar 1 arrows	2	3
																												MUSC3 Scar	2021_01_17 Slide330 MUSC3 Scar aSMA_gH2AX 60x Scar 1 arrows		1
																												MUSC3 Scar	2021_01_17 Slide330 MUSC3 Scar aSMA_gH2AX 60x Scar 1 arrows	1	3
																												MUSC3 Scar	2021_01_17 Slide330 MUSC3 Scar aSMA_gH2AX 60x Scar 2 arrows		4
																												MUSC3 Scar	2021_01_17 Slide330 MUSC3 Scar aSMA_gH2AX 60x Scar 2 arrows		6
																												MUSC3 Scar	2021_01_17 Slide330 MUSC3 Scar aSMA_gH2AX 60x Scar 2 arrows		1
																												MUSC3 Scar	2021_01_17 Slide330 MUSC3 Scar aSMA_gH2AX 60x Scar 2 arrows		1
																												MUSC3 Scar	2021_01_17 Slide330 MUSC3 Scar aSMA_gH2AX 60x Scar 2 arrows		1
																												MUSC3 Scar	2021_01_17 Slide330 MUSC3 Scar aSMA_gH2AX 60x Scar 2 arrows		15
																												MUSC3 Scar	2021_01_17 Slide330 MUSC3 Scar aSMA_gH2AX 60x Scar 2 arrows		10
																												MUSC3 Scar	2021_01_17 Slide330 MUSC3 Scar aSMA_gH2AX 60x Scar 2 arrows		5
																												MUSC3 Scar	2021_01_17 Slide330 MUSC3 Scar aSMA_gH2AX 60x Scar 2 arrows		3
																												MUSC3 Scar	2021_01_17 Slide330 MUSC3 Scar aSMA_gH2AX 60x Scar 2 arrows		2
																												MUSC3 Scar	2021_01_17 Slide330 MUSC3 Scar aSMA_gH2AX 60x Scar 2 arrows		2
																												MUSC3 Scar	2021_01_17 Slide330 MUSC3 Scar aSMA_gH2AX 60x Scar 4 arrows		2
																												MUSC3 Scar	2021_01_17 Slide330 MUSC3 Scar aSMA_gH2AX 60x Scar 4 arrows		4
																												MUSC3 Scar	2021_01_17 Slide330 MUSC3 Scar aSMA_gH2AX 60x Scar 4 arrows		3
																												MUSC3 Scar	2021_01_17 Slide330 MUSC3 Scar aSMA_gH2AX 60x Scar 4 arrows		3
																												MUSC3 Scar	2021_01_17 Slide330 MUSC3 Scar aSMA_gH2AX 60x Scar 4 arrows		1
																												MUSC3 Scar	2021_01_17 Slide330 MUSC3 Scar aSMA_gH2AX 60x Scar 4 arrows		1
																												MUSC3 Scar	2021_01_17 Slide330 MUSC3 Scar aSMA_gH2AX 60x Scar 4 arrows		2
																												MUSC3 Scar	2021_01_17 Slide330 MUSC3 Scar aSMA_gH2AX 60x Scar 4 arrows		3
																												MUSC3 Scar	2021_01_17 Slide330 MUSC3 Scar aSMA_gH2AX 60x Scar 4 arrows		1
																												MUSC3 Scar	2021_01_17 Slide330 MUSC3 Scar aSMA_gH2AX 60x Scar 4 arrows		1
																												MUSC3 Scar	2021_01_17 Slide330 MUSC3 Scar aSMA_gH2AX 60x Scar 4 arrows		4
																												MUSC3 Scar	2021_01_17 Slide330 MUSC3 Scar aSMA_gH2AX 60x Scar 4 arrows		1
																												MUSC3 Scar	2021_01_17 Slide330 MUSC3 Scar aSMA_gH2AX 60x Scar 4 arrows		2
																												MUSC3 Scar	2021_01_17 Slide330 MUSC3 Scar aSMA_gH2AX 60x Scar 4 arrows		1
																												MUSC3 Scar	2021_01_17 Slide330 MUSC3 Scar aSMA_gH2AX 60x Scar 4 arrows		1
																												MUSC3 Scar	2021_01_17 Slide330 MUSC3 Scar aSMA_gH2AX 60x Scar 4 arrows		5
																												MUSC3 Scar	2021_01_17 Slide330 MUSC3 Scar aSMA_gH2AX 60x Scar 4 arrows		4
																												MUSC3 Scar	2021_01_17 Slide330 MUSC3 Scar aSMA_gH2AX 60x Scar 4 arrows		4
																												MUSC3 Scar	2021_01_17 Slide330 MUSC3 Scar aSMA_gH2AX 60x Scar 4 arrows		1
																												MUSC3 Scar	2021_01_17 Slide330 MUSC3 Scar aSMA_gH2AX 60x Scar 4 arrows		1
																												MUSC3 Scar	2021_01_17 Slide330 MUSC3 Scar aSMA_gH2AX 60x Scar 4 arrows		2
																												MUSC3 Scar	2021_01_17 Slide330 MUSC3 Scar aSMA_gH2AX 60x Scar 4 arrows		2
																												MUSC3 Scar	2021_01_17 Slide330 MUSC3 Scar aSMA_gH2AX 60x Scar 4 arrows		1
																												MUSC3 Scar	2021_01_17 Slide330 MUSC3 Scar aSMA_gH2AX 60x Scar 4 arrows		2
																												MUSC3 Scar	2021_01_17 Slide330 MUSC3 Scar aSMA_gH2AX 60x Scar 4 arrows		3
																												MUSC3 Scar	2021_01_17 Slide330 MUSC3 Scar aSMA_gH2AX 60x Scar 4 arrows		1
																												MUSC3 Scar	2021_01_17 Slide330 MUSC3 Scar aSMA_gH2AX 60x Scar 4 arrows		2
																												MUSC3 Scar	2021_01_17 Slide330 MUSC3 Scar aSMA_gH2AX 60x Scar 4 arrows		4
																												MUSC3 Scar	2021_01_17 Slide330 MUSC3 Scar aSMA_gH2AX 60x Scar 4 arrows		2
																												MUSC3 Scar	2021_01_17 Slide330 MUSC3 Scar aSMA_gH2AX 60x Scar 4 arrows		3
																												MUSC8 IBZ	2021_01_28 Slide349 MUSC8 IBZ vWF_gH2AX 60x Scar 1 arrows	3	4
																												MUSC8 IBZ	2021_01_28 Slide349 MUSC8 IBZ vWF_gH2AX 60x Scar 1 arrows	3	3
																												MUSC8 IBZ	2021_01_28 Slide349 MUSC8 IBZ vWF_gH2AX 60x Scar 1 arrows	2	3
																												MUSC8 IBZ	2021_01_28 Slide349 MUSC8 IBZ vWF_gH2AX 60x Scar 1 arrows	2
																												MUSC8 IBZ	2021_01_28 Slide349 MUSC8 IBZ vWF_gH2AX 60x Scar 1 arrows	3
																												MUSC8 IBZ	2021_01_28 Slide349 MUSC8 IBZ vWF_gH2AX 60x Scar 1 arrows	1
																												MUSC8 IBZ	2021_01_28 Slide349 MUSC8 IBZ vWF_gH2AX 60x Scar 1 arrows	1
																												MUSC8 IBZ	2021_01_28 Slide349 MUSC8 IBZ vWF_gH2AX 60x Scar 1 arrows	3
																												MUSC8 IBZ	2021_01_28 Slide349 MUSC8 IBZ vWF_gH2AX 60x Scar 1 arrows	3
																												MUSC8 IBZ	2021_01_28 Slide349 MUSC8 IBZ vWF_gH2AX 60x Scar 1 arrows	3
																												MUSC8 IBZ	2021_01_28 Slide349 MUSC8 IBZ vWF_gH2AX 60x Scar 1 arrows	1
																												MUSC8 IBZ	2021_01_28 Slide349 MUSC8 IBZ vWF_gH2AX 60x Scar 1 arrows	1
																												MUSC8 IBZ	2021_01_28 Slide349 MUSC8 IBZ vWF_gH2AX 60x Scar 1 arrows	1
																												MUSC8 IBZ	2021_01_28 Slide349 MUSC8 IBZ vWF_gH2AX 60x Scar 1 arrows	3
																												MUSC8 IBZ	2021_01_28 Slide349 MUSC8 IBZ vWF_gH2AX 60x Scar 2 arrows	3	2
																												MUSC8 IBZ	2021_01_28 Slide349 MUSC8 IBZ vWF_gH2AX 60x Scar 2 arrows	1
																												MUSC8 IBZ	2021_01_28 Slide349 MUSC8 IBZ vWF_gH2AX 60x Scar 2 arrows	2
																												MUSC8 IBZ	2021_01_28 Slide349 MUSC8 IBZ vWF_gH2AX 60x Scar 2 arrows	2
																												MUSC8 IBZ	2021_01_28 Slide349 MUSC8 IBZ vWF_gH2AX 60x Scar 2 arrows	1	1
																												MUSC8 IBZ	2021_01_28 Slide349 MUSC8 IBZ vWF_gH2AX 60x Scar 3 arrows		2
																												MUSC8 IBZ	2021_01_28 Slide349 MUSC8 IBZ vWF_gH2AX 60x Scar 3 arrows		1
																												MUSC8 IBZ	2021_01_28 Slide349 MUSC8 IBZ vWF_gH2AX 60x Scar 3 arrows	2	2
																												MUSC8 IBZ	2021_01_28 Slide349 MUSC8 IBZ vWF_gH2AX 60x Scar 3 arrows	1	1
																												MUSC8 IBZ	2021_01_28 Slide349 MUSC8 IBZ vWF_gH2AX 60x Scar 3 arrows	2	1
																												MUSC8 IBZ	2021_01_28 Slide349 MUSC8 IBZ vWF_gH2AX 60x Scar 4 arrows	3	1
																												MUSC8 IBZ	2021_01_28 Slide349 MUSC8 IBZ vWF_gH2AX 60x Scar 4 arrows	1
																												MUSC8 IBZ	2021_01_28 Slide349 MUSC8 IBZ vWF_gH2AX 60x Scar 4 arrows	1
																												MUSC8 IBZ	2021_01_28 Slide349 MUSC8 IBZ vWF_gH2AX 60x Scar 4 arrows	2
																												MUSC8 IBZ	2021_01_28 Slide349 MUSC8 IBZ vWF_gH2AX 60x Scar 4 arrows	2
																												MUSC8 IBZ	2021_01_28 Slide349 MUSC8 IBZ vWF_gH2AX 60x Scar 4 arrows	2
																												MUSC8 IBZ	2021_01_28 Slide349 MUSC8 IBZ vWF_gH2AX 60x Scar 4 arrows	3
																												MUSC8 IBZ	2021_01_28 Slide349 MUSC8 IBZ vWF_gH2AX 60x Scar 4 arrows	1	3
																												MUSC8 IBZ	2021_01_28 Slide349 MUSC8 IBZ vWF_gH2AX 60x Scar 4 arrows	1
																												MUSC8 IBZ	2021_01_28 Slide349 MUSC8 IBZ vWF_gH2AX 60x Scar 4 arrows	2
																												MUSC8 IBZ	2021_01_28 Slide349 MUSC8 IBZ vWF_gH2AX 60x Scar 4 arrows	1
																												MUSC8 IBZ	2021_01_28 Slide349 MUSC8 IBZ vWF_gH2AX 60x Scar 4 arrows	1
																												MUSC8 IBZ	2021_01_28 Slide349 MUSC8 IBZ vWF_gH2AX 60x Scar 4 arrows	1
																												MUSC8 IBZ	2021_01_28 Slide349 MUSC8 IBZ vWF_gH2AX 60x Scar 4 arrows	1
																												MUSC8 IBZ	2021_01_28 Slide349 MUSC8 IBZ vWF_gH2AX 60x Scar 4 arrows	2
																												MUSC8 IBZ	2021_01_28 Slide349 MUSC8 IBZ vWF_gH2AX 60x Scar 4 arrows	2
																												MUSC8 IBZ	2021_01_28 Slide349 MUSC8 IBZ vWF_gH2AX 60x Scar 4 arrows	1
																												MUSC8 IBZ	2021_01_28 Slide349 MUSC8 IBZ vWF_gH2AX 60x Scar 5 arrows	4
																												MUSC8 IBZ	2021_01_28 Slide349 MUSC8 IBZ vWF_gH2AX 60x Scar 5 arrows	1
																												MUSC8 IBZ	2021_01_28 Slide349 MUSC8 IBZ vWF_gH2AX 60x Scar 5 arrows	2
																												MUSC8 IBZ	2021_01_28 Slide349 MUSC8 IBZ vWF_gH2AX 60x Scar 5 arrows	3
																												MUSC8 IBZ	2021_01_28 Slide349 MUSC8 IBZ vWF_gH2AX 60x Scar 5 arrows	3
																												MUSC8 IBZ	2021_01_28 Slide349 MUSC8 IBZ vWF_gH2AX 60x Scar 5 arrows	2
																												MUSC8 IBZ	2021_01_28 Slide349 MUSC8 IBZ vWF_gH2AX 60x Scar 5 arrows	3
																												MUSC8 IBZ	2021_01_28 Slide349 MUSC8 IBZ vWF_gH2AX 60x Scar 5 arrows	1
																												MUSC41 IBZ	2021_01_28 Slide352 MUS41 IBZ vWF_gH2AX 60x Scar 1 arrows	3	3
																												MUSC41 IBZ	2021_01_28 Slide352 MUS41 IBZ vWF_gH2AX 60x Scar 1 arrows	2
																												MUSC41 IBZ	2021_01_28 Slide352 MUS41 IBZ vWF_gH2AX 60x Scar 1 arrows	1
																												MUSC41 IBZ	2021_01_28 Slide352 MUS41 IBZ vWF_gH2AX 60x Scar 1 arrows	2	1
																												MUSC41 IBZ	2021_01_28 Slide352 MUS41 IBZ vWF_gH2AX 60x Scar 1 arrows	1
																												MUSC41 IBZ	2021_01_28 Slide352 MUS41 IBZ vWF_gH2AX 60x Scar 2 arrows	6	4
																												MUSC41 IBZ	2021_01_28 Slide352 MUS41 IBZ vWF_gH2AX 60x Scar 2 arrows	4	1
																												MUSC41 IBZ	2021_01_28 Slide352 MUS41 IBZ vWF_gH2AX 60x Scar 2 arrows	3
																												MUSC41 IBZ	2021_01_28 Slide352 MUS41 IBZ vWF_gH2AX 60x Scar 3 arrows
																												MUSC41 IBZ	2021_01_28 Slide352 MUS41 IBZ vWF_gH2AX 60x Scar 4 arrows	4	5
																												MUSC41 IBZ	2021_01_28 Slide352 MUS41 IBZ vWF_gH2AX 60x Scar 4 arrows		1
																												MUSC41 IBZ	2021_01_28 Slide352 MUS41 IBZ vWF_gH2AX 60x Scar 5 arrows	2	3
																												MUSC41 IBZ	2021_01_28 Slide352 MUS41 IBZ vWF_gH2AX 60x Scar 5 arrows	2	1
																												MUSC41 IBZ	2021_01_28 Slide352 MUS41 IBZ vWF_gH2AX 60x Scar 5 arrows		2
																												MUSC15 Scar	2021_01_28 Slide355 MUSC15 Scar vWF_gH2AX 60x Scar 1 arrows	3
																												MUSC15 Scar	2021_01_28 Slide355 MUSC15 Scar vWF_gH2AX 60x Scar 1 arrows	1
																												MUSC15 Scar	2021_01_28 Slide355 MUSC15 Scar vWF_gH2AX 60x Scar 1 arrows	1
																												MUSC15 Scar	2021_01_28 Slide355 MUSC15 Scar vWF_gH2AX 60x Scar 1 arrows	1
																												MUSC15 Scar	2021_01_28 Slide355 MUSC15 Scar vWF_gH2AX 60x Scar 1 arrows	2
																												MUSC15 Scar	2021_01_28 Slide355 MUSC15 Scar vWF_gH2AX 60x Scar 1 arrows	2
																												MUSC15 Scar	2021_01_28 Slide355 MUSC15 Scar vWF_gH2AX 60x Scar 1 arrows	1
																												MUSC15 Scar	2021_01_28 Slide355 MUSC15 Scar vWF_gH2AX 60x Scar 1 arrows	2
																												MUSC15 Scar	2021_01_28 Slide355 MUSC15 Scar vWF_gH2AX 60x Scar 1 arrows	1
																												MUSC15 Scar	2021_01_28 Slide355 MUSC15 Scar vWF_gH2AX 60x Scar 1 arrows	1
																												MUSC15 Scar	2021_01_28 Slide355 MUSC15 Scar vWF_gH2AX 60x Scar 1 arrows	1
																												MUSC15 Scar	2021_01_28 Slide355 MUSC15 Scar vWF_gH2AX 60x Scar 1 arrows	1
																												MUSC15 Scar	2021_01_28 Slide355 MUSC15 Scar vWF_gH2AX 60x Scar 2 arrows	2
																												MUSC15 Scar	2021_01_28 Slide355 MUSC15 Scar vWF_gH2AX 60x Scar 2 arrows	3	3
																												MUSC15 Scar	2021_01_28 Slide355 MUSC15 Scar vWF_gH2AX 60x Scar 2 arrows	3
																												MUSC15 Scar	2021_01_28 Slide355 MUSC15 Scar vWF_gH2AX 60x Scar 2 arrows	1
																												MUSC15 Scar	2021_01_28 Slide355 MUSC15 Scar vWF_gH2AX 60x Scar 2 arrows	2
																												MUSC15 Scar	2021_01_28 Slide355 MUSC15 Scar vWF_gH2AX 60x Scar 3 arrows	4
																												MUSC15 Scar	2021_01_28 Slide355 MUSC15 Scar vWF_gH2AX 60x Scar 3 arrows	3
																												MUSC15 Scar	2021_01_28 Slide355 MUSC15 Scar vWF_gH2AX 60x Scar 3 arrows	2
																												MUSC15 Scar	2021_01_28 Slide355 MUSC15 Scar vWF_gH2AX 60x Scar 3 arrows	1
																												MUSC15 Scar	2021_01_28 Slide355 MUSC15 Scar vWF_gH2AX 60x Scar 3 arrows	4
																												MUSC15 Scar	2021_01_28 Slide355 MUSC15 Scar vWF_gH2AX 60x Scar 3 arrows	1
																												MUSC15 Scar	2021_01_28 Slide355 MUSC15 Scar vWF_gH2AX 60x Scar 3 arrows	2
																												MUSC15 Scar	2021_01_28 Slide355 MUSC15 Scar vWF_gH2AX 60x Scar 3 arrows	3
																												MUSC15 Scar	2021_01_28 Slide355 MUSC15 Scar vWF_gH2AX 60x Scar 3 arrows	2
																												MUSC15 Scar	2021_01_28 Slide355 MUSC15 Scar vWF_gH2AX 60x Scar 3 arrows	1
																												MUSC15 Scar	2021_01_28 Slide355 MUSC15 Scar vWF_gH2AX 60x Scar 3 arrows	1
																												MUSC15 Scar	2021_01_28 Slide355 MUSC15 Scar vWF_gH2AX 60x Scar 3 arrows	1
																												MUSC15 Scar	2021_01_28 Slide355 MUSC15 Scar vWF_gH2AX 60x Scar 3 arrows	1
																												MUSC15 Scar	2021_01_28 Slide355 MUSC15 Scar vWF_gH2AX 60x Scar 4 arrows	8
																												MUSC15 Scar	2021_01_28 Slide355 MUSC15 Scar vWF_gH2AX 60x Scar 4 arrows	4	2
																												MUSC15 Scar	2021_01_28 Slide355 MUSC15 Scar vWF_gH2AX 60x Scar 4 arrows	3	3
																												MUSC15 Scar	2021_01_28 Slide355 MUSC15 Scar vWF_gH2AX 60x Scar 4 arrows	4
																												MUSC15 Scar	2021_01_28 Slide355 MUSC15 Scar vWF_gH2AX 60x Scar 4 arrows	3
																												MUSC15 Scar	2021_01_28 Slide355 MUSC15 Scar vWF_gH2AX 60x Scar 5 arrows	5
																												MUSC15 Scar	2021_01_28 Slide355 MUSC15 Scar vWF_gH2AX 60x Scar 5 arrows	2
																												MUSC15 Scar	2021_01_28 Slide355 MUSC15 Scar vWF_gH2AX 60x Scar 5 arrows	1
																												MUSC15 Scar	2021_01_28 Slide355 MUSC15 Scar vWF_gH2AX 60x Scar 5 arrows	1
																												MUSC15 Scar	2021_01_28 Slide355 MUSC15 Scar vWF_gH2AX 60x Scar 5 arrows	3
																												MUSC15 Scar	2021_01_28 Slide355 MUSC15 Scar vWF_gH2AX 60x Scar 5 arrows	2
																												MUSC15 Scar	2021_01_28 Slide355 MUSC15 Scar vWF_gH2AX 60x Scar 5 arrows	2
																												MUSC3 Scar	2021_02_07 Slide329 MUSC3 Scar vWF_gH2AX 60x Scar 1 arrows	2
																												MUSC3 Scar	2021_02_07 Slide329 MUSC3 Scar vWF_gH2AX 60x Scar 1 arrows	3
																												MUSC3 Scar	2021_02_07 Slide329 MUSC3 Scar vWF_gH2AX 60x Scar 1 arrows	1
																												MUSC3 Scar	2021_02_07 Slide329 MUSC3 Scar vWF_gH2AX 60x Scar 1 arrows	1
																												MUSC3 Scar	2021_02_07 Slide329 MUSC3 Scar vWF_gH2AX 60x Scar 1 arrows	1
																												MUSC3 Scar	2021_02_07 Slide329 MUSC3 Scar vWF_gH2AX 60x Scar 1 arrows	2
																												MUSC3 Scar	2021_02_07 Slide329 MUSC3 Scar vWF_gH2AX 60x Scar 1 arrows	2
																												MUSC3 Scar	2021_02_07 Slide329 MUSC3 Scar vWF_gH2AX 60x Scar 2 arrows	1
																												MUSC3 Scar	2021_02_07 Slide329 MUSC3 Scar vWF_gH2AX 60x Scar 2 arrows	1
																												MUSC3 Scar	2021_02_07 Slide329 MUSC3 Scar vWF_gH2AX 60x Scar 3 arrows
																												MUSC3 Scar	2021_02_07 Slide329 MUSC3 Scar vWF_gH2AX 60x Scar 4 arrows
																												MUSC3 Scar	2021_02_07 Slide329 MUSC3 Scar vWF_gH2AX 60x Scar 5 arrows
																												MUSC3 Scar	2021_03_02 MUSC3 Scar CD68_gH2AX 60x Scar 1 arrows	3	6
																												MUSC3 Scar	2021_03_02 MUSC3 Scar CD68_gH2AX 60x Scar 2 arrows	1
																												MUSC3 Scar	2021_03_02 MUSC3 Scar CD68_gH2AX 60x Scar 2 arrows	1	1
																												MUSC3 Scar	2021_03_02 MUSC3 Scar CD68_gH2AX 60x Scar 3 arrows	6	6
																												MUSC3 Scar	2021_03_02 MUSC3 Scar CD68_gH2AX 60x Scar 3 arrows	9	2
																												MUSC3 Scar	2021_03_02 MUSC3 Scar CD68_gH2AX 60x Scar 3 arrows	5	2
																												MUSC3 Scar	2021_03_02 MUSC3 Scar CD68_gH2AX 60x Scar 3 arrows	2	1
																												MUSC3 Scar	2021_03_02 MUSC3 Scar CD68_gH2AX 60x Scar 3 arrows	3	1
																												MUSC3 Scar	2021_03_02 MUSC3 Scar CD68_gH2AX 60x Scar 3 arrows	1
																												MUSC3 Scar	2021_03_02 MUSC3 Scar CD68_gH2AX 60x Scar 4 arrows	10	4
																												MUSC3 Scar	2021_03_02 MUSC3 Scar CD68_gH2AX 60x Scar 4 arrows	2	3
																												MUSC3 Scar	2021_03_02 MUSC3 Scar CD68_gH2AX 60x Scar 4 arrows	6	5
																												MUSC3 Scar	2021_03_02 MUSC3 Scar CD68_gH2AX 60x Scar 4 arrows	4	6
																												MUSC3 Scar	2021_03_02 MUSC3 Scar CD68_gH2AX 60x Scar 4 arrows	3
																												MUSC3 Scar	2021_03_02 MUSC3 Scar CD68_gH2AX 60x Scar 4 arrows	3
																												MUSC3 Scar	2021_03_02 MUSC3 Scar CD68_gH2AX 60x Scar 4 arrows	3
																												MUSC3 Scar	2021_03_02 MUSC3 Scar CD68_gH2AX 60x Scar 4 arrows	3
																												MUSC3 Scar	2021_03_02 MUSC3 Scar CD68_gH2AX 60x Scar 4 arrows	3	2
																												MUSC3 Scar	2021_03_02 MUSC3 Scar CD68_gH2AX 60x Scar 4 arrows	6	3
																												MUSC3 Scar	2021_03_02 MUSC3 Scar CD68_gH2AX 60x Scar 4 arrows	4
																												MUSC3 Scar	2021_03_02 MUSC3 Scar CD68_gH2AX 60x Scar 4 arrows	6
																												MUSC3 Scar	2021_03_02 MUSC3 Scar CD68_gH2AX 60x Scar 4 arrows	1
																												MUSC3 Scar	2021_03_02 MUSC3 Scar CD68_gH2AX 60x Scar 4 arrows	3
																												MUSC3 Scar	2021_03_02 MUSC3 Scar CD68_gH2AX 60x Scar 4 arrows	1	8
																												MUSC3 Scar	2021_03_02 MUSC3 Scar CD68_gH2AX 60x Scar 4 arrows	8	8
																												MUSC3 Scar	2021_03_02 MUSC3 Scar CD68_gH2AX 60x Scar 4 arrows	4
																												MUSC3 Scar	2021_03_02 MUSC3 Scar CD68_gH2AX 60x Scar 4 arrows	1
																												MUSC3 Scar	2021_03_02 MUSC3 Scar CD68_gH2AX 60x Scar 4 arrows	2	3
																												MUSC3 Scar	2021_03_02 MUSC3 Scar CD68_gH2AX 60x Scar 4 arrows	2
																												MUSC3 Scar	2021_03_02 MUSC3 Scar CD68_gH2AX 60x Scar 5 arrows	12
																												MUSC3 Scar	2021_03_02 MUSC3 Scar CD68_gH2AX 60x Scar 5 arrows	2
																												MUSC3 Scar	2021_03_02 MUSC3 Scar CD68_gH2AX 60x Scar 5 arrows	1
																												MUSC3 Scar	2021_03_02 MUSC3 Scar CD68_gH2AX 60x Scar 5 arrows	2
																												MUSC3 Scar	2021_03_02 MUSC3 Scar CD68_gH2AX 60x Scar 5 arrows	5
																												MUSC3 Scar	2021_03_02 MUSC3 Scar CD68_gH2AX 60x Scar 5 arrows	3
																												MUSC3 Scar	2021_03_02 MUSC3 Scar CD68_gH2AX 60x Scar 5 arrows	2
																												MUSC3 Scar	2021_03_02 MUSC3 Scar CD68_gH2AX 60x Scar 5 arrows	1
																												MUSC3 Scar	2021_03_02 MUSC3 Scar CD68_gH2AX 60x Scar 5 arrows	5
																												MUSC3 Scar	2021_03_02 MUSC3 Scar CD68_gH2AX 60x Scar 5 arrows	1
																												MUSC3 Scar	2021_03_02 MUSC3 Scar CD68_gH2AX 60x Scar 5 arrows	2	4
																												MUSC3 Scar	2021_03_02 MUSC3 Scar CD68_gH2AX 60x Scar 5 arrows	1	3
																												MUSC3 Scar	2021_03_02 MUSC3 Scar CD68_gH2AX 60x Scar 5 arrows	5
																												MUSC3 Scar	2021_03_02 MUSC3 Scar CD68_gH2AX 60x Scar 5 arrows	2
																												MUSC3 Scar	2021_03_02 MUSC3 Scar CD68_gH2AX 60x Scar 5 arrows	1
																												MUSC8 IBZ	2021_03_02 MUSC8 IBZ CD68_gH2AX 60x Scar 1 arrows	2
																												MUSC8 IBZ	2021_03_02 MUSC8 IBZ CD68_gH2AX 60x Scar 1 arrows	2
																												MUSC8 IBZ	2021_03_02 MUSC8 IBZ CD68_gH2AX 60x Scar 1 arrows	1
																												MUSC8 IBZ	2021_03_02 MUSC8 IBZ CD68_gH2AX 60x Scar 1 arrows	1
																												MUSC8 IBZ	2021_03_02 MUSC8 IBZ CD68_gH2AX 60x Scar 1 arrows	1
																												MUSC8 IBZ	2021_03_02 MUSC8 IBZ CD68_gH2AX 60x Scar 2 arrows	2	7
																												MUSC8 IBZ	2021_03_02 MUSC8 IBZ CD68_gH2AX 60x Scar 2 arrows	1
																												MUSC8 IBZ	2021_03_02 MUSC8 IBZ CD68_gH2AX 60x Scar 2 arrows	1
																												MUSC8 IBZ	2021_03_02 MUSC8 IBZ CD68_gH2AX 60x Scar 2 arrows	2
																												MUSC8 IBZ	2021_03_02 MUSC8 IBZ CD68_gH2AX 60x Scar 2 arrows	1
																												MUSC8 IBZ	2021_03_02 MUSC8 IBZ CD68_gH2AX 60x Scar 3 arrows	1	6
																												MUSC8 IBZ	2021_03_02 MUSC8 IBZ CD68_gH2AX 60x Scar 3 arrows		1
																												MUSC8 IBZ	2021_03_02 MUSC8 IBZ CD68_gH2AX 60x Scar 4 arrows
																												MUSC8 IBZ	2021_03_02 MUSC8 IBZ CD68_gH2AX 60x Scar 5 arrows	4
																												MUSC8 IBZ	2021_03_02 MUSC8 IBZ CD68_gH2AX 60x Scar 5 arrows	2
																												MUSC8 IBZ	2021_03_02 MUSC8 IBZ CD68_gH2AX 60x Scar 5 arrows	3
																												MUSC8 IBZ	2021_03_02 MUSC8 IBZ CD68_gH2AX 60x Scar 5 arrows	2
																												MUSC8 IBZ	2021_03_02 MUSC8 IBZ CD68_gH2AX 60x Scar 5 arrows	1
																												MUSC8 IBZ	2021_03_02 MUSC8 IBZ CD68_gH2AX 60x Scar 5 arrows	1
																												MUSC8 IBZ	2021_03_02 MUSC8 IBZ CD68_gH2AX 60x Scar 5 arrows	1
																												MUSC8 IBZ	2021_03_02 MUSC8 IBZ CD68_gH2AX 60x Scar 5 arrows	1
																												MUSC8 IBZ	2021_03_02 MUSC8 IBZ CD68_gH2AX 60x Scar 5 arrows	2
																												MUSC8 IBZ	2021_03_02 MUSC8 IBZ CD68_gH2AX 60x Scar 5 arrows	1
																												MUSC8 IBZ	2021_03_02 MUSC8 IBZ CD68_gH2AX 60x Scar 5 arrows	2
																												MUSC8 IBZ	2021_03_02 MUSC8 IBZ CD68_gH2AX 60x Scar 5 arrows	1
																												MUSC8 IBZ	2021_03_02 MUSC8 IBZ CD68_gH2AX 60x Scar 5 arrows	2
																												MUSC8 IBZ	2021_03_02 MUSC8 IBZ CD68_gH2AX 60x Scar 5 arrows	1
																												MUSC15 Scar	2021_03_02 MUSC15 Scar CD68_gH2AX 60x Scar 1 arrows	8
																												MUSC15 Scar	2021_03_02 MUSC15 Scar CD68_gH2AX 60x Scar 1 arrows	9
																												MUSC15 Scar	2021_03_02 MUSC15 Scar CD68_gH2AX 60x Scar 1 arrows	7	3
																												MUSC15 Scar	2021_03_02 MUSC15 Scar CD68_gH2AX 60x Scar 1 arrows	6	5
																												MUSC15 Scar	2021_03_02 MUSC15 Scar CD68_gH2AX 60x Scar 1 arrows	7
																												MUSC15 Scar	2021_03_02 MUSC15 Scar CD68_gH2AX 60x Scar 1 arrows	8
																												MUSC15 Scar	2021_03_02 MUSC15 Scar CD68_gH2AX 60x Scar 1 arrows	2
																												MUSC15 Scar	2021_03_02 MUSC15 Scar CD68_gH2AX 60x Scar 1 arrows	1
																												MUSC15 Scar	2021_03_02 MUSC15 Scar CD68_gH2AX 60x Scar 1 arrows	1
																												MUSC15 Scar	2021_03_02 MUSC15 Scar CD68_gH2AX 60x Scar 1 arrows	7
																												MUSC15 Scar	2021_03_02 MUSC15 Scar CD68_gH2AX 60x Scar 1 arrows	2
																												MUSC15 Scar	2021_03_02 MUSC15 Scar CD68_gH2AX 60x Scar 1 arrows	4	3
																												MUSC15 Scar	2021_03_02 MUSC15 Scar CD68_gH2AX 60x Scar 1 arrows	5
																												MUSC15 Scar	2021_03_02 MUSC15 Scar CD68_gH2AX 60x Scar 1 arrows	10
																												MUSC15 Scar	2021_03_02 MUSC15 Scar CD68_gH2AX 60x Scar 1 arrows	2
																												MUSC15 Scar	2021_03_02 MUSC15 Scar CD68_gH2AX 60x Scar 1 arrows	4
																												MUSC15 Scar	2021_03_02 MUSC15 Scar CD68_gH2AX 60x Scar 1 arrows	5	4
																												MUSC15 Scar	2021_03_02 MUSC15 Scar CD68_gH2AX 60x Scar 1 arrows	5	4
																												MUSC15 Scar	2021_03_02 MUSC15 Scar CD68_gH2AX 60x Scar 1 arrows	3	9
																												MUSC15 Scar	2021_03_02 MUSC15 Scar CD68_gH2AX 60x Scar 1 arrows	6
																												MUSC15 Scar	2021_03_02 MUSC15 Scar CD68_gH2AX 60x Scar 1 arrows	7
																												MUSC15 Scar	2021_03_02 MUSC15 Scar CD68_gH2AX 60x Scar 1 arrows	6
																												MUSC15 Scar	2021_03_02 MUSC15 Scar CD68_gH2AX 60x Scar 1 arrows	2	1
																												MUSC15 Scar	2021_03_02 MUSC15 Scar CD68_gH2AX 60x Scar 1 arrows	8
																												MUSC15 Scar	2021_03_02 MUSC15 Scar CD68_gH2AX 60x Scar 1 arrows	4
																												MUSC15 Scar	2021_03_02 MUSC15 Scar CD68_gH2AX 60x Scar 1 arrows	5	4
																												MUSC15 Scar	2021_03_02 MUSC15 Scar CD68_gH2AX 60x Scar 1 arrows	2	3
																												MUSC15 Scar	2021_03_02 MUSC15 Scar CD68_gH2AX 60x Scar 1 arrows	2	1
																												MUSC15 Scar	2021_03_02 MUSC15 Scar CD68_gH2AX 60x Scar 1 arrows	3	2
																												MUSC15 Scar	2021_03_02 MUSC15 Scar CD68_gH2AX 60x Scar 1 arrows	2
																												MUSC15 Scar	2021_03_02 MUSC15 Scar CD68_gH2AX 60x Scar 1 arrows	2
																												MUSC15 Scar	2021_03_02 MUSC15 Scar CD68_gH2AX 60x Scar 1 arrows	3
																												MUSC15 Scar	2021_03_02 MUSC15 Scar CD68_gH2AX 60x Scar 1 arrows	3	5
																												MUSC15 Scar	2021_03_02 MUSC15 Scar CD68_gH2AX 60x Scar 1 arrows		7
																												MUSC15 Scar	2021_03_02 MUSC15 Scar CD68_gH2AX 60x Scar 1 arrows		2
																												MUSC15 Scar	2021_03_02 MUSC15 Scar CD68_gH2AX 60x Scar 1 arrows	4	4
																												MUSC15 Scar	2021_03_02 MUSC15 Scar CD68_gH2AX 60x Scar 1 arrows	1	2
																												MUSC15 Scar	2021_03_02 MUSC15 Scar CD68_gH2AX 60x Scar 1 arrows	5	3
																												MUSC15 Scar	2021_03_02 MUSC15 Scar CD68_gH2AX 60x Scar 1 arrows	1	6
																												MUSC15 Scar	2021_03_02 MUSC15 Scar CD68_gH2AX 60x Scar 1 arrows		7
																												MUSC15 Scar	2021_03_02 MUSC15 Scar CD68_gH2AX 60x Scar 1 arrows	3	2
																												MUSC15 Scar	2021_03_02 MUSC15 Scar CD68_gH2AX 60x Scar 1 arrows	4	2
																												MUSC15 Scar	2021_03_02 MUSC15 Scar CD68_gH2AX 60x Scar 1 arrows	3
																												MUSC15 Scar	2021_03_02 MUSC15 Scar CD68_gH2AX 60x Scar 1 arrows	4
																												MUSC15 Scar	2021_03_02 MUSC15 Scar CD68_gH2AX 60x Scar 1 arrows	7
																												MUSC15 Scar	2021_03_02 MUSC15 Scar CD68_gH2AX 60x Scar 1 arrows	4
																												MUSC15 Scar	2021_03_02 MUSC15 Scar CD68_gH2AX 60x Scar 1 arrows	4
																												MUSC15 Scar	2021_03_02 MUSC15 Scar CD68_gH2AX 60x Scar 2 arrows	2	5
																												MUSC15 Scar	2021_03_02 MUSC15 Scar CD68_gH2AX 60x Scar 2 arrows	1	1
																												MUSC15 Scar	2021_03_02 MUSC15 Scar CD68_gH2AX 60x Scar 2 arrows	3	3
																												MUSC15 Scar	2021_03_02 MUSC15 Scar CD68_gH2AX 60x Scar 2 arrows	1	3
																												MUSC15 Scar	2021_03_02 MUSC15 Scar CD68_gH2AX 60x Scar 2 arrows	2	3
																												MUSC15 Scar	2021_03_02 MUSC15 Scar CD68_gH2AX 60x Scar 2 arrows	5	5
																												MUSC15 Scar	2021_03_02 MUSC15 Scar CD68_gH2AX 60x Scar 2 arrows	7	4
																												MUSC15 Scar	2021_03_02 MUSC15 Scar CD68_gH2AX 60x Scar 2 arrows	3
																												MUSC15 Scar	2021_03_02 MUSC15 Scar CD68_gH2AX 60x Scar 2 arrows	1	7
																												MUSC15 Scar	2021_03_02 MUSC15 Scar CD68_gH2AX 60x Scar 2 arrows	3	2
																												MUSC15 Scar	2021_03_02 MUSC15 Scar CD68_gH2AX 60x Scar 2 arrows	12	1
																												MUSC15 Scar	2021_03_02 MUSC15 Scar CD68_gH2AX 60x Scar 2 arrows	7	3
																												MUSC15 Scar	2021_03_02 MUSC15 Scar CD68_gH2AX 60x Scar 2 arrows	3	1
																												MUSC15 Scar	2021_03_02 MUSC15 Scar CD68_gH2AX 60x Scar 2 arrows	5	2
																												MUSC15 Scar	2021_03_02 MUSC15 Scar CD68_gH2AX 60x Scar 2 arrows	1	1
																												MUSC15 Scar	2021_03_02 MUSC15 Scar CD68_gH2AX 60x Scar 2 arrows	2	1
																												MUSC15 Scar	2021_03_02 MUSC15 Scar CD68_gH2AX 60x Scar 2 arrows	3	1
																												MUSC15 Scar	2021_03_02 MUSC15 Scar CD68_gH2AX 60x Scar 2 arrows	1	4
																												MUSC15 Scar	2021_03_02 MUSC15 Scar CD68_gH2AX 60x Scar 2 arrows	1	3
																												MUSC15 Scar	2021_03_02 MUSC15 Scar CD68_gH2AX 60x Scar 2 arrows	5	1
																												MUSC15 Scar	2021_03_02 MUSC15 Scar CD68_gH2AX 60x Scar 2 arrows	3	2
																												MUSC15 Scar	2021_03_02 MUSC15 Scar CD68_gH2AX 60x Scar 2 arrows	4	6
																												MUSC15 Scar	2021_03_02 MUSC15 Scar CD68_gH2AX 60x Scar 2 arrows	1	5
																												MUSC15 Scar	2021_03_02 MUSC15 Scar CD68_gH2AX 60x Scar 2 arrows	4	4
																												MUSC15 Scar	2021_03_02 MUSC15 Scar CD68_gH2AX 60x Scar 2 arrows	2	2
																												MUSC15 Scar	2021_03_02 MUSC15 Scar CD68_gH2AX 60x Scar 2 arrows	1	3
																												MUSC15 Scar	2021_03_02 MUSC15 Scar CD68_gH2AX 60x Scar 2 arrows	7	3
																												MUSC15 Scar	2021_03_02 MUSC15 Scar CD68_gH2AX 60x Scar 2 arrows	4	6
																												MUSC15 Scar	2021_03_02 MUSC15 Scar CD68_gH2AX 60x Scar 2 arrows	7	3
																												MUSC15 Scar	2021_03_02 MUSC15 Scar CD68_gH2AX 60x Scar 2 arrows	7	5
																												MUSC15 Scar	2021_03_02 MUSC15 Scar CD68_gH2AX 60x Scar 2 arrows	3	2
																												MUSC15 Scar	2021_03_02 MUSC15 Scar CD68_gH2AX 60x Scar 2 arrows	6	1
																												MUSC15 Scar	2021_03_02 MUSC15 Scar CD68_gH2AX 60x Scar 2 arrows	3	1
																												MUSC15 Scar	2021_03_02 MUSC15 Scar CD68_gH2AX 60x Scar 2 arrows	1	5
																												MUSC15 Scar	2021_03_02 MUSC15 Scar CD68_gH2AX 60x Scar 2 arrows	5	2
																												MUSC15 Scar	2021_03_02 MUSC15 Scar CD68_gH2AX 60x Scar 2 arrows		5
																												MUSC15 Scar	2021_03_02 MUSC15 Scar CD68_gH2AX 60x Scar 2 arrows		2
																												MUSC15 Scar	2021_03_02 MUSC15 Scar CD68_gH2AX 60x Scar 3 arrows	3
																												MUSC15 Scar	2021_03_02 MUSC15 Scar CD68_gH2AX 60x Scar 3 arrows	1	6
																												MUSC15 Scar	2021_03_02 MUSC15 Scar CD68_gH2AX 60x Scar 3 arrows	3	3
																												MUSC15 Scar	2021_03_02 MUSC15 Scar CD68_gH2AX 60x Scar 3 arrows	4
																												MUSC15 Scar	2021_03_02 MUSC15 Scar CD68_gH2AX 60x Scar 3 arrows		2
																												MUSC15 Scar	2021_03_02 MUSC15 Scar CD68_gH2AX 60x Scar 3 arrows		2
																												MUSC15 Scar	2021_03_02 MUSC15 Scar CD68_gH2AX 60x Scar 3 arrows	1	5
																												MUSC15 Scar	2021_03_02 MUSC15 Scar CD68_gH2AX 60x Scar 3 arrows		4
																												MUSC15 Scar	2021_03_02 MUSC15 Scar CD68_gH2AX 60x Scar 3 arrows		3
																												MUSC15 Scar	2021_03_02 MUSC15 Scar CD68_gH2AX 60x Scar 3 arrows	3	5
																												MUSC15 Scar	2021_03_02 MUSC15 Scar CD68_gH2AX 60x Scar 3 arrows	2
																												MUSC15 Scar	2021_03_02 MUSC15 Scar CD68_gH2AX 60x Scar 3 arrows	2
																												MUSC15 Scar	2021_03_02 MUSC15 Scar CD68_gH2AX 60x Scar 3 arrows	1
																												MUSC15 Scar	2021_03_02 MUSC15 Scar CD68_gH2AX 60x Scar 3 arrows	2	2
																												MUSC15 Scar	2021_03_02 MUSC15 Scar CD68_gH2AX 60x Scar 3 arrows		2
																												MUSC15 Scar	2021_03_02 MUSC15 Scar CD68_gH2AX 60x Scar 3 arrows		4
																												MUSC15 Scar	2021_03_02 MUSC15 Scar CD68_gH2AX 60x Scar 3 arrows		5
																												MUSC15 Scar	2021_03_02 MUSC15 Scar CD68_gH2AX 60x Scar 3 arrows	3	1
																												MUSC15 Scar	2021_03_02 MUSC15 Scar CD68_gH2AX 60x Scar 3 arrows		3
																												MUSC15 Scar	2021_03_02 MUSC15 Scar CD68_gH2AX 60x Scar 3 arrows		3
																												MUSC15 Scar	2021_03_02 MUSC15 Scar CD68_gH2AX 60x Scar 3 arrows		3
																												MUSC15 Scar	2021_03_02 MUSC15 Scar CD68_gH2AX 60x Scar 3 arrows		4
																												MUSC15 Scar	2021_03_02 MUSC15 Scar CD68_gH2AX 60x Scar 3 arrows		3
																												MUSC15 Scar	2021_03_02 MUSC15 Scar CD68_gH2AX 60x Scar 4 arrows	4	2
																												MUSC15 Scar	2021_03_02 MUSC15 Scar CD68_gH2AX 60x Scar 4 arrows	5
																												MUSC15 Scar	2021_03_02 MUSC15 Scar CD68_gH2AX 60x Scar 4 arrows	5
																												MUSC15 Scar	2021_03_02 MUSC15 Scar CD68_gH2AX 60x Scar 4 arrows	2
																												MUSC15 Scar	2021_03_02 MUSC15 Scar CD68_gH2AX 60x Scar 4 arrows	4
																												MUSC15 Scar	2021_03_02 MUSC15 Scar CD68_gH2AX 60x Scar 4 arrows	2
																												MUSC15 Scar	2021_03_02 MUSC15 Scar CD68_gH2AX 60x Scar 4 arrows	4	1
																												MUSC15 Scar	2021_03_02 MUSC15 Scar CD68_gH2AX 60x Scar 4 arrows	2
																												MUSC15 Scar	2021_03_02 MUSC15 Scar CD68_gH2AX 60x Scar 4 arrows	2
																												MUSC15 Scar	2021_03_02 MUSC15 Scar CD68_gH2AX 60x Scar 4 arrows	2
																												MUSC15 Scar	2021_03_02 MUSC15 Scar CD68_gH2AX 60x Scar 4 arrows	3
																												MUSC15 Scar	2021_03_02 MUSC15 Scar CD68_gH2AX 60x Scar 4 arrows	2
																												MUSC15 Scar	2021_03_02 MUSC15 Scar CD68_gH2AX 60x Scar 4 arrows	3
																												MUSC15 Scar	2021_03_02 MUSC15 Scar CD68_gH2AX 60x Scar 4 arrows	2
																												MUSC15 Scar	2021_03_02 MUSC15 Scar CD68_gH2AX 60x Scar 4 arrows	1
																												MUSC15 Scar	2021_03_02 MUSC15 Scar CD68_gH2AX 60x Scar 4 arrows	2	2
																												MUSC15 Scar	2021_03_02 MUSC15 Scar CD68_gH2AX 60x Scar 4 arrows	1
																												MUSC15 Scar	2021_03_02 MUSC15 Scar CD68_gH2AX 60x Scar 4 arrows	1
																												MUSC15 Scar	2021_03_02 MUSC15 Scar CD68_gH2AX 60x Scar 4 arrows	6
																												MUSC15 Scar	2021_03_02 MUSC15 Scar CD68_gH2AX 60x Scar 4 arrows	2
																												MUSC15 Scar	2021_03_02 MUSC15 Scar CD68_gH2AX 60x Scar 5 arrows	1	1
																												MUSC15 Scar	2021_03_02 MUSC15 Scar CD68_gH2AX 60x Scar 5 arrows	3
																												MUSC15 Scar	2021_03_02 MUSC15 Scar CD68_gH2AX 60x Scar 5 arrows	1
																												MUSC15 Scar	2021_03_02 MUSC15 Scar CD68_gH2AX 60x Scar 5 arrows	2
																												MUSC15 Scar	2021_03_02 MUSC15 Scar CD68_gH2AX 60x Scar 5 arrows	1	2
																												MUSC41 IBZ	2021_03_02 MUSC41 IBZ CD68_gH2AX 60x Scar 1 arrows	4
																												MUSC41 IBZ	2021_03_02 MUSC41 IBZ CD68_gH2AX 60x Scar 1 arrows	2
																												MUSC41 IBZ	2021_03_02 MUSC41 IBZ CD68_gH2AX 60x Scar 1 arrows	1	1
																												MUSC41 IBZ	2021_03_02 MUSC41 IBZ CD68_gH2AX 60x Scar 1 arrows	1
																												MUSC41 IBZ	2021_03_02 MUSC41 IBZ CD68_gH2AX 60x Scar 1 arrows	1
																												MUSC41 IBZ	2021_03_02 MUSC41 IBZ CD68_gH2AX 60x Scar 2 arrows	2
																												MUSC41 IBZ	2021_03_02 MUSC41 IBZ CD68_gH2AX 60x Scar 2 arrows	3	3
																												MUSC41 IBZ	2021_03_02 MUSC41 IBZ CD68_gH2AX 60x Scar 2 arrows	2
																												MUSC41 IBZ	2021_03_02 MUSC41 IBZ CD68_gH2AX 60x Scar 2 arrows	1
																												MUSC41 IBZ	2021_03_02 MUSC41 IBZ CD68_gH2AX 60x Scar 2 arrows	1
																												MUSC41 IBZ	2021_03_02 MUSC41 IBZ CD68_gH2AX 60x Scar 2 arrows	2
																												MUSC41 IBZ	2021_03_02 MUSC41 IBZ CD68_gH2AX 60x Scar 3 arrows	1
																												MUSC41 IBZ	2021_03_02 MUSC41 IBZ CD68_gH2AX 60x Scar 3 arrows	1
																												MUSC41 IBZ	2021_03_02 MUSC41 IBZ CD68_gH2AX 60x Scar 3 arrows	1
																												MUSC41 IBZ	2021_03_02 MUSC41 IBZ CD68_gH2AX 60x Scar 3 arrows	1
																												MUSC41 IBZ	2021_03_02 MUSC41 IBZ CD68_gH2AX 60x Scar 3 arrows	1
																												MUSC41 IBZ	2021_03_02 MUSC41 IBZ CD68_gH2AX 60x Scar 3 arrows	2
																												MUSC41 IBZ	2021_03_02 MUSC41 IBZ CD68_gH2AX 60x Scar 3 arrows	1
																												MUSC41 IBZ	2021_03_02 MUSC41 IBZ CD68_gH2AX 60x Scar 4 arrows		3
																												MUSC41 IBZ	2021_03_02 MUSC41 IBZ CD68_gH2AX 60x Scar 4 arrows	1	4
																												MUSC41 IBZ	2021_03_02 MUSC41 IBZ CD68_gH2AX 60x Scar 4 arrows		6
																												MUSC41 IBZ	2021_03_02 MUSC41 IBZ CD68_gH2AX 60x Scar 4 arrows	5	1
																												MUSC41 IBZ	2021_03_02 MUSC41 IBZ CD68_gH2AX 60x Scar 4 arrows	2
																												MUSC41 IBZ	2021_03_02 MUSC41 IBZ CD68_gH2AX 60x Scar 4 arrows	1
																												MUSC41 IBZ	2021_03_02 MUSC41 IBZ CD68_gH2AX 60x Scar 4 arrows	1
																												MUSC41 IBZ	2021_03_02 MUSC41 IBZ CD68_gH2AX 60x Scar 5 arrows	1
																												MUSC41 IBZ	2021_03_02 MUSC41 IBZ CD68_gH2AX 60x Scar 4 arrows	3
																												MUSC41 IBZ	2021_03_02 MUSC41 IBZ CD68_gH2AX 60x Scar 5 arrows	1
																												MUSC41 IBZ	2021_03_02 MUSC41 IBZ CD68_gH2AX 60x Scar 4 arrows	1
																												MUSC41 IBZ	2021_03_02 MUSC41 IBZ CD68_gH2AX 60x Scar 5 arrows	2
																												MUSC41 IBZ	2021_03_02 MUSC41 IBZ CD68_gH2AX 60x Scar 4 arrows	2
																												MUSC41 IBZ	2021_03_02 MUSC41 IBZ CD68_gH2AX 60x Scar 5 arrows		1
																												MUSC41 IBZ	2021_03_02 MUSC41 IBZ CD68_gH2AX 60x Scar 4 arrows	1
																												MUSC41 IBZ	2021_03_02 MUSC41 IBZ CD68_gH2AX 60x Scar 5 arrows	1
																												MUSC41 IBZ	2021_03_02 MUSC41 IBZ CD68_gH2AX 60x Scar 4 arrows	1
																												MUSC41 IBZ	2021_03_02 MUSC41 IBZ CD68_gH2AX 60x Scar 5 arrows	1
