# Supplementary material for: Myofibroblast senescence promotes arrhythmogenic remodeling in the aged infarcted rabbit heart
Source: eLife. 2023 May 19;12:e84088. doi: 10.7554/eLife.84088 (PMC10259375; doi:10.7554/eLife.84088)
Supplement: Figure 6—source data 3. [file elife-84088-fig6-data3.xls]

## Sheet: Results
Block Type	Fast 96-Well Block (0.1mL)
Calibration Background is expired	Yes
Calibration Background performed on	2019-05-09 12:29:50 PM EDT
Calibration FAM is expired	Yes
Calibration FAM performed on	2019-05-09 12:44:56 PM EDT
Calibration NED is expired	Yes
Calibration NED performed on	2019-05-09 12:52:22 PM EDT
Calibration ROI is expired	Yes
Calibration ROI performed on	2019-05-09 12:06:49 PM EDT
Calibration ROX is expired	Yes
Calibration ROX performed on	2019-05-09 12:59:39 PM EDT
Calibration SYBR is expired	Yes
Calibration SYBR performed on	2019-05-09 13:06:46 PM EDT
Calibration TAMRA is expired	Yes
Calibration TAMRA performed on	2019-05-09 13:14:04 PM EDT
Calibration Uniformity is expired	Yes
Calibration Uniformity performed on	2019-05-09 12:37:28 PM EDT
Calibration VIC is expired	Yes
Calibration VIC performed on	2019-05-09 13:21:20 PM EDT
Chemistry	SYBR_GREEN
Experiment Barcode
Experiment Comments
Experiment File Name	G:\My Drive\Koren Lab\qPCR\2019_11_22 hCFs Senescence qPCR\2019-11-22 154410 BCB hCFs senescence qPCR.eds
Experiment Name	2019-11-22 154410 BCB hCFs senescence qPCR
Experiment Run Start Time	2019-11-22 15:45:50 PM EST
Experiment Run Stop Time	2019-11-22 16:34:05 PM EST
Experiment Type	Comparative Cт (ΔΔCт)
Experiment User Name
Instrument Name	278881592
Instrument Serial Number	278881592
Instrument Type	ViiA(TM) 7 System
Passive Reference	ROX
Quantification Cycle Method	Ct
Signal Smoothing On	true
Stage/ Cycle where Analysis is performed	Stage 2, Step 2
Well	Well Position	Omit	Sample Name	Target Name	Task	Reporter	Quencher	Quantity	Quantity Mean	Quantity SD	RQ	RQ Min	RQ Max	CT	Ct Mean	Ct SD	Delta Ct	Delta Ct Mean	Delta Ct SE	Delta Delta Ct	Automatic Ct Threshold	Ct Threshold	Automatic Baseline	Baseline Start	Baseline End	Comments	Tm1	Tm2	Tm3	Custom1	Custom2	Custom3	Custom4	Custom5	Custom6	MTP	EXPFAIL	NOISE	HIGHSD	SPIKE	NOAMP	BADROX	THOLDFAIL
1	A1	FALSE	Prolif	IL6	UNKNOWN	SYBR	None							Undetermined							TRUE	0.214487	TRUE	1	40		63.5644									N	Y	N	N	N	Y	N	N
2	A2	FALSE	Prolif	IL6	UNKNOWN	SYBR	None							Undetermined							TRUE	0.214487	TRUE	1	40		61.6136									N	Y	N	N	N	Y	N	N
3	A3	FALSE	Prolif	IL6	UNKNOWN	SYBR	None							Undetermined							TRUE	0.214487	TRUE	1	40		65.5153									N	Y	N	N	N	Y	N	N
4	A4	FALSE	Prolif	CXCL8	UNKNOWN	SYBR	None							Undetermined							TRUE	0.0678407	TRUE	1	40		61.3209									N	Y	N	N	N	Y	N	N
5	A5	FALSE	Prolif	CXCL8	UNKNOWN	SYBR	None							Undetermined							TRUE	0.0678407	TRUE	1	40		61.516									N	Y	N	N	N	Y	N	N
6	A6	FALSE	Prolif	CXCL8	UNKNOWN	SYBR	None							Undetermined							TRUE	0.0678407	TRUE	1	40		65.2227									N	Y	N	N	N	Y	N	N
7	A7	FALSE	Prolif	CCL2	UNKNOWN	SYBR	None							Undetermined							TRUE	0.166958	TRUE	1	40		61.0283									N	Y	N	N	N	Y	N	N
8	A8	FALSE	Prolif	CCL2	UNKNOWN	SYBR	None							Undetermined							TRUE	0.166958	TRUE	1	40		65.1251									N	N	N	N	N	N	N	N
9	A9	FALSE	Prolif	CCL2	UNKNOWN	SYBR	None							Undetermined							TRUE	0.166958	TRUE	1	40		61.0283									N	Y	N	N	N	Y	N	N
10	A10	FALSE	Prolif	CXCL2	UNKNOWN	SYBR	None							Undetermined							TRUE	0.04	TRUE	1	40		61.0283									N	Y	N	N	N	Y	N	Y
11	A11	FALSE	Prolif	CXCL2	UNKNOWN	SYBR	None							Undetermined							TRUE	0.04	TRUE	1	40		64.3448									N	Y	N	N	N	Y	N	Y
12	A12	FALSE	Prolif	CXCL2	UNKNOWN	SYBR	None							Undetermined							TRUE	0.04	TRUE	1	40		67.5637									N	Y	N	N	N	Y	N	Y
13	B1	FALSE	Veh D6	IL6	UNKNOWN	SYBR	None							Undetermined							TRUE	0.214487	TRUE	1	40		63.2718									N	Y	N	N	N	Y	N	N
14	B2	FALSE	Veh D6	IL6	UNKNOWN	SYBR	None							Undetermined							TRUE	0.214487	TRUE	1	40		61.8086									N	Y	N	N	N	Y	N	N
15	B3	FALSE	Veh D6	IL6	UNKNOWN	SYBR	None							Undetermined							TRUE	0.214487	TRUE	1	40		62.8816									N	Y	N	N	N	Y	N	N
16	B4	FALSE	Veh D6	CXCL8	UNKNOWN	SYBR	None							Undetermined	37.8667	0.316974					TRUE	0.0678407	TRUE	1	40		62.6865									N	Y	N	N	N	Y	N	N
17	B5	FALSE	Veh D6	CXCL8	UNKNOWN	SYBR	None							38.0909	37.8667	0.316974					TRUE	0.0678407	TRUE	1	40		78.0009									N	N	N	N	N	N	N	N
18	B6	FALSE	Veh D6	CXCL8	UNKNOWN	SYBR	None							37.6426	37.8667	0.316974					TRUE	0.0678407	TRUE	1	40		78.7813									N	N	N	N	N	N	N	N
19	B7	FALSE	Veh D6	CCL2	UNKNOWN	SYBR	None							Undetermined							TRUE	0.166958	TRUE	1	40		61.0283									N	Y	N	N	N	Y	N	N
20	B8	FALSE	Veh D6	CCL2	UNKNOWN	SYBR	None							Undetermined							TRUE	0.166958	TRUE	1	40		60.9308									N	Y	N	N	N	Y	N	N
21	B9	FALSE	Veh D6	CCL2	UNKNOWN	SYBR	None							Undetermined							TRUE	0.166958	TRUE	1	40		60.9308									N	Y	N	N	N	Y	N	N
22	B10	FALSE	Veh D6	CXCL2	UNKNOWN	SYBR	None							35.6184	34.7033	1.25287					TRUE	0.04	TRUE	1	40		75.2697									N	N	N	Y	N	N	N	Y
23	B11	FALSE	Veh D6	CXCL2	UNKNOWN	SYBR	None							33.2754	34.7033	1.25287					TRUE	0.04	TRUE	1	40		75.3673									N	N	N	Y	N	N	N	Y
24	B12	FALSE	Veh D6	CXCL2	UNKNOWN	SYBR	None							35.216	34.7033	1.25287					TRUE	0.04	TRUE	1	40		76.2452									N	N	N	Y	N	N	N	Y
25	C1	FALSE	Veh D12	IL6	UNKNOWN	SYBR	None							30.678	29.5971	0.95343					TRUE	0.214487	TRUE	1	40		78.196									N	N	N	Y	N	N	N	N
26	C2	FALSE	Veh D12	IL6	UNKNOWN	SYBR	None							29.2378	29.5971	0.95343					TRUE	0.214487	TRUE	1	40		78.6838									N	N	N	Y	N	N	N	N
27	C3	FALSE	Veh D12	IL6	UNKNOWN	SYBR	None							28.8756	29.5971	0.95343					TRUE	0.214487	TRUE	1	40		78.7813									N	N	N	Y	N	N	N	N
28	C4	FALSE	Veh D12	CXCL8	UNKNOWN	SYBR	None							Undetermined	33.8495						TRUE	0.0678407	TRUE	1	40		67.6613	83.0732	85.9996							Y	Y	N	N	N	Y	N	N
29	C5	FALSE	Veh D12	CXCL8	UNKNOWN	SYBR	None							33.8495	33.8495			4.25238			TRUE	0.0678407	TRUE	1	40		78.2936									N	N	N	N	N	N	N	N
30	C6	FALSE	Veh D12	CXCL8	UNKNOWN	SYBR	None							Undetermined	33.8495						TRUE	0.0678407	TRUE	1	40		68.149									N	Y	N	N	N	Y	N	N
31	C7	FALSE	Veh D12	CCL2	UNKNOWN	SYBR	None							Undetermined	34.879	0.585031					TRUE	0.166958	TRUE	1	40		61.1258									N	Y	N	N	N	Y	N	N
32	C8	FALSE	Veh D12	CCL2	UNKNOWN	SYBR	None							35.2927	34.879	0.585031		5.28187	0.688578		TRUE	0.166958	TRUE	1	40		82.2929									N	N	N	Y	N	N	N	N
33	C9	FALSE	Veh D12	CCL2	UNKNOWN	SYBR	None							34.4653	34.879	0.585031		5.28187	0.688578		TRUE	0.166958	TRUE	1	40		82.8782									N	N	N	Y	N	N	N	N
34	C10	FALSE	Veh D12	CXCL2	UNKNOWN	SYBR	None							Undetermined	35.4306						TRUE	0.04	TRUE	1	40		60.9308									N	Y	N	N	N	Y	N	Y
35	C11	FALSE	Veh D12	CXCL2	UNKNOWN	SYBR	None							Undetermined	35.4306						TRUE	0.04	TRUE	1	40		60.9308									N	Y	N	N	N	Y	N	Y
36	C12	FALSE	Veh D12	CXCL2	UNKNOWN	SYBR	None				1.82135e-05			35.4306	35.4306			5.83349		15.7446	TRUE	0.04	TRUE	1	40		79.8543	63.3694								Y	N	N	N	N	N	N	Y
37	D1	FALSE	Eto D6	IL6	UNKNOWN	SYBR	None							32.5467	32.4608	0.12155					TRUE	0.214487	TRUE	1	40		78.8788									N	N	N	N	N	N	N	N
38	D2	FALSE	Eto D6	IL6	UNKNOWN	SYBR	None							32.3748	32.4608	0.12155					TRUE	0.214487	TRUE	1	40		79.0739									N	N	N	N	N	N	N	N
39	D3	FALSE	Eto D6	IL6	UNKNOWN	SYBR	None							Undetermined	32.4608	0.12155					TRUE	0.214487	TRUE	1	40		60.8332									N	Y	N	N	N	Y	N	N
40	D4	FALSE	Eto D6	CXCL8	UNKNOWN	SYBR	None							Undetermined							TRUE	0.0678407	TRUE	1	40		60.9308									N	Y	N	N	N	Y	N	N
41	D5	FALSE	Eto D6	CXCL8	UNKNOWN	SYBR	None							Undetermined							TRUE	0.0678407	TRUE	1	40		62.3939									N	Y	N	N	N	Y	N	N
42	D6	FALSE	Eto D6	CXCL8	UNKNOWN	SYBR	None							Undetermined							TRUE	0.0678407	TRUE	1	40		82.488									N	Y	N	N	N	Y	N	N
43	D7	FALSE	Eto D6	CCL2	UNKNOWN	SYBR	None							Undetermined							TRUE	0.166958	TRUE	1	40		60.9308									N	Y	N	N	N	Y	N	N
44	D8	FALSE	Eto D6	CCL2	UNKNOWN	SYBR	None							Undetermined							TRUE	0.166958	TRUE	1	40		61.0283									N	Y	N	N	N	Y	N	N
45	D9	FALSE	Eto D6	CCL2	UNKNOWN	SYBR	None							Undetermined							TRUE	0.166958	TRUE	1	40		60.9308									N	Y	N	N	N	Y	N	N
46	D10	FALSE	Eto D6	CXCL2	UNKNOWN	SYBR	None				1	4.65817e-16	2.14677e+15	10.7128	22.5496	16.7398		-9.91114	11.8371	0	TRUE	0.04	TRUE	1	40		60.8332									N	N	N	Y	N	N	N	Y
47	D11	FALSE	Eto D6	CXCL2	UNKNOWN	SYBR	None							Undetermined	22.5496	16.7398					TRUE	0.04	TRUE	1	40		61.0283									N	Y	N	N	N	Y	N	Y
48	D12	FALSE	Eto D6	CXCL2	UNKNOWN	SYBR	None				1	4.65817e-16	2.14677e+15	34.3865	22.5496	16.7398		-9.91114	11.8371	0	TRUE	0.04	TRUE	1	40		80.4395									N	N	N	Y	N	N	N	Y
49	E1	FALSE	Eto D12	IL6	UNKNOWN	SYBR	None							32.7211	32.4353	0.291104					TRUE	0.214487	TRUE	1	40		78.3911									N	N	N	N	N	N	N	N
50	E2	FALSE	Eto D12	IL6	UNKNOWN	SYBR	None							32.4455	32.4353	0.291104					TRUE	0.214487	TRUE	1	40		78.6838									N	N	N	N	N	N	N	N
51	E3	FALSE	Eto D12	IL6	UNKNOWN	SYBR	None							32.1392	32.4353	0.291104					TRUE	0.214487	TRUE	1	40		78.9764									N	N	N	N	N	N	N	N
52	E4	FALSE	Eto D12	CXCL8	UNKNOWN	SYBR	None							32.2053	33.6078	1.53618		1.1725	0.902698		TRUE	0.0678407	TRUE	1	40		78.0009									N	N	N	Y	N	N	N	N
53	E5	FALSE	Eto D12	CXCL8	UNKNOWN	SYBR	None							33.3684	33.6078	1.53618		1.1725	0.902698		TRUE	0.0678407	TRUE	1	40		78.3911									N	N	N	Y	N	N	N	N
54	E6	FALSE	Eto D12	CXCL8	UNKNOWN	SYBR	None							35.2496	33.6078	1.53618		1.1725	0.902698		TRUE	0.0678407	TRUE	1	40		79.1715									N	N	N	Y	N	N	N	N
55	E7	FALSE	Eto D12	CCL2	UNKNOWN	SYBR	None							Undetermined	34.7384						TRUE	0.166958	TRUE	1	40		61.0283									N	N	N	N	N	N	N	N
56	E8	FALSE	Eto D12	CCL2	UNKNOWN	SYBR	None							34.7384	34.7384			2.30315			TRUE	0.166958	TRUE	1	40		82.7806									N	N	N	N	N	N	N	N
57	E9	FALSE	Eto D12	CCL2	UNKNOWN	SYBR	None							Undetermined	34.7384						TRUE	0.166958	TRUE	1	40		61.0283									N	Y	N	N	N	Y	N	N
58	E10	FALSE	Eto D12	CXCL2	UNKNOWN	SYBR	None							Undetermined	33.5683						TRUE	0.04	TRUE	1	40		63.1743									N	Y	N	N	N	Y	N	Y
59	E11	FALSE	Eto D12	CXCL2	UNKNOWN	SYBR	None							Undetermined	33.5683						TRUE	0.04	TRUE	1	40		60.8332									N	Y	N	N	N	Y	N	Y
60	E12	FALSE	Eto D12	CXCL2	UNKNOWN	SYBR	None				0.000473545			33.5683	33.5683			1.13307		11.0442	TRUE	0.04	TRUE	1	40		80.342									N	N	N	N	N	N	N	Y
61	F1	FALSE	Prolif	IL1B	UNKNOWN	SYBR	None							23.406	30.8605	10.5423					TRUE	0.2	TRUE	1	40		85.8045									N	N	Y	Y	Y	N	N	Y
62	F2	FALSE	Veh D6	IL1B	UNKNOWN	SYBR	None							Undetermined	22.4182						TRUE	0.2	TRUE	1	40		66.5883									N	Y	N	N	N	N	N	Y
63	F3	FALSE	Veh D12	IL1B	UNKNOWN	SYBR	None							Undetermined	36.6037						TRUE	0.2	TRUE	1	40		70.3925									N	Y	N	N	N	N	N	Y
64	F4	FALSE	Eto D6	IL1B	UNKNOWN	SYBR	None				1			18.4483	18.4483			-14.0125		0	TRUE	0.2	TRUE	1	40		62.6865									N	N	N	N	N	N	Y	Y
65	F5	FALSE	Eto D12	IL1B	UNKNOWN	SYBR	None				0.000288901	1.9871e-05	0.00420027	31.3817	30.1799	1.69958		-2.25538	1.21348	11.7571	TRUE	0.2	TRUE	1	40		72.0508									N	N	N	Y	N	N	N	Y
73	G1	FALSE	Prolif	IL1B	UNKNOWN	SYBR	None							Undetermined	30.8605	10.5423					TRUE	0.2	TRUE	1	40		81.415									N	N	N	N	N	N	N	Y
74	G2	FALSE	Veh D6	IL1B	UNKNOWN	SYBR	None							Undetermined	22.4182						TRUE	0.2	TRUE	1	40		84.9266									N	Y	N	N	N	N	Y	Y
75	G3	FALSE	Veh D12	IL1B	UNKNOWN	SYBR	None				4.70555e-07			36.6037	36.6037			7.00662		21.0191	TRUE	0.2	TRUE	1	40		89.9989									N	N	N	N	N	N	N	Y
76	G4	FALSE	Eto D6	IL1B	UNKNOWN	SYBR	None							Undetermined	18.4483						TRUE	0.2	TRUE	1	40		79.1715									N	Y	N	N	N	N	N	Y
77	G5	FALSE	Eto D12	IL1B	UNKNOWN	SYBR	None				0.000288901	1.9871e-05	0.00420027	28.9781	30.1799	1.69958		-2.25538	1.21348	11.7571	TRUE	0.2	TRUE	1	40		68.9294									N	N	N	Y	N	N	N	Y
85	H1	FALSE	Prolif	IL1B	UNKNOWN	SYBR	None							38.315	30.8605	10.5423					TRUE	0.2	TRUE	1	40		87.2676									N	N	N	Y	N	N	N	Y
86	H2	FALSE	Veh D6	IL1B	UNKNOWN	SYBR	None							22.4182	22.4182						TRUE	0.2	TRUE	1	40		62.1013									N	N	N	N	Y	N	N	Y
87	H3	FALSE	Veh D12	IL1B	UNKNOWN	SYBR	None							Undetermined	36.6037						TRUE	0.2	TRUE	1	40		93.9006									N	Y	N	N	N	N	N	Y
88	H4	FALSE	Eto D6	IL1B	UNKNOWN	SYBR	None							Undetermined	18.4483						TRUE	0.2	TRUE	1	40		64.4423									N	Y	N	N	N	N	N	Y
89	H5	FALSE	Eto D12	IL1B	UNKNOWN	SYBR	None							Undetermined	30.1799	1.69958					TRUE	0.2	TRUE	1	40		90.2915									N	Y	N	N	N	N	N	Y
