# Supplementary material for: Myofibroblast senescence promotes arrhythmogenic remodeling in the aged infarcted rabbit heart
Source: eLife. 2023 May 19;12:e84088. doi: 10.7554/eLife.84088 (PMC10259375; doi:10.7554/eLife.84088)
Supplement: Figure 7—figure supplement 1—source data 1. [file elife-84088-fig7-figsupp1-data1.xlsx]

## Sheet: Sheet1
APD90
	0.25 Hz Stim.					1.25 Hz Stim.
Proliferating Fibroblasts	Senescent Fibroblasts	Cardiomyocytes Only			Proliferating	Senescent	Cardiomyocyte Only
141.067	789.199	56.4408			345.29	519.122	72.8318
128.02	190.048	99.5675			270.545	328.01	137.375
47.1807	172.697	203.515			413.932	436.636	261.235
25.583	659.417	169.398			55.1022	307.184	173.375
240.149	311.987	416.33			394.055	343.304	253.053
380.205	164.689	214.325			291.07	286.72	216.935
290.125	106.47	215.618			164.812	360.688	320.18
115.942	371.165	166.387			125.441	402.903	193.278
84.9997	643.08	148.145			259.69	49.7355	259.845
125.043	346.806	239.26			337.375	142.187	147.852
296.512	38.2293				328.423	253.455	182.273
	59.5987					215.31
	145.475					101.255
	82.86
APD50
	0.25 Hz Stim.					1.25 Hz Stim.
Proliferating Fibroblasts	Senescent Fibroblasts	Cardiomyocytes Only			Proliferating	Senescent	Cardiomyocyte Only
50.6873	639.288	20.3403			245.782	370.943	32.5278
49.4775	111.121	61.4725			177.171	133.739	92.395
20.2678	37.914	120.94			202.038	311.49	144.57
4.59595	515.075	102.325			15.63	225.289	109.515
119.895	227.534	354.215			189.907	251.247	158.935
188.667	87.6225	148.197			200.947	174.14	153.058
51.0551	21.88	159.382			99.2366	273.245	258.64
41.92	68.43	85.4975			75.4848	320.895	117.778
70.91	517.57	94.075			4.59595	22.2662	195.19
228.118	260.832	84.355			194.002	89.6522	94.6975
	14.4431				274.305	170.915	83.0525
	25.1932				248.41	153.725
	76.5675					46.225
	31.8675
