# Supplementary material for: Myofibroblast senescence promotes arrhythmogenic remodeling in the aged infarcted rabbit heart
Source: eLife. 2023 May 19;12:e84088. doi: 10.7554/eLife.84088 (PMC10259375; doi:10.7554/eLife.84088)
Supplement: Figure 7—source data 1. [file elife-84088-fig7-data1.xlsx]

## Sheet: ALL
MP_mV
Proliferating														RbProl (12)	SEM. n=	12
-30	0.0356981	0.0504278	0.191822	0.0966317	-0.000218523	0.0202653	0.0414628	0.0204758	0.189217	0.0398586	0.0446506	0.0472106		0.0647918	0.0186014	0.064437
-20	0.0801953	0.100063	0.14787	0.140134	0.157746	0.0789172	0.0276434	0.162762	0.158668	0.225986	0.208894	0.0666642		0.129629	0.0135182	0.0468286
-10	0.11218	0.266887	0.188724	0.241266	0.485111	0.385384	0.11081	0.251708	0.493113	0.178534	0.181754	0.105739		0.250101	0.040114	0.138959
0	0.143073	0.456793	0.707636	0.732538	0.850698	0.875913	0.463138	0.306328	0.964383	0.317319	0.911548	0.221298		0.579222	0.0760139	0.26332
10	0.281014	0.644032	1.08977	1.13605	0.966778	1.19386	0.763507	0.363782	1.34591	0.228179	1.39351	0.380666		0.815588	0.0944726	0.327263
20	0.196789	0.83974	1.22668	1.51202	0.950101	1.26241	0.918904	0.647159	1.14665	0.863892	1.68574	0.4965		0.978882	0.121396	0.420527
30	0.477651	0.766544	1.39218	1.61338	1.07956	1.14497	0.913304	0.966223	1.45885	0.904463	1.78155	0.529837		1.08571	0.109974	0.380962
40	0.56276	0.686377	1.50094	1.43982	1.20724	1.21687	0.852386	1.26785	1.43509	1.38376	1.88264	0.589797		1.16879	0.106368	0.368468
MP_mV
Senescent														Senesc. (9)	SEM. n=	9
-30	0.408768	0.06518	-0.05752	0.046376	0.0128249	0.223427	0.0860174	0.0998059	0.0304234					0.1017	0.0901337	0.156116
-20	0.003471	-0.01543	-0.02983	0.0248566	0.260435	-0.0856969	0.0175234	0.0204166	0.00224691					0.0219992	0.0636151	0.110185
-10	0.019134	0.040877	0.231127	0.154524	0.575744	0.401769	0.0623414	0.149209	0.228447					0.207019	0.120386	0.208514
0	0.208439	0.316364	0.708573	0.532788	0.474149	0.408351	0.545845	0.197498	0.29897					0.410108	0.0946177	0.163883
10	0.521802	0.520595	1.06964	0.941506	0.992413	0.702324	0.983403	0.656971	0.8796					0.807584	0.13456	0.233064
20	0.656319	1.07696	1.28493	1.13282	0.951414	0.56653	1.37999	0.720669	1.30283					1.00805	0.175938	0.304734
30	1.26692	1.18864	1.27874	1.22297	1.06002	0.970866	1.44674	0.562833	1.40102					1.15542	0.0894847	0.154992
40	1.27306	1.17058	1.41012	1.13839	1.61967	1.1057	1.63288	0.386262	1.46016					1.24409	0.128563	0.222678
