# Supplementary material for: Myofibroblast senescence promotes arrhythmogenic remodeling in the aged infarcted rabbit heart
Source: eLife. 2023 May 19;12:e84088. doi: 10.7554/eLife.84088 (PMC10259375; doi:10.7554/eLife.84088)
Supplement: Figure 7—source data 2. [file elife-84088-fig7-data2.xlsx]

## Sheet: Sheet1
APD90
Proliferating Media	SASP Media
136.026	137.258
106.577	137.314
160.447	52.3346
64.1587	133.925
66.3004	126.79
89.6188	62.4306
127.446	175.465
141.289	93.8721
128.264	73.5436
68.943
APD50
Proliferating Media	SASP Media
107.367	105.86
80.818	106.927
134.713	33.4347
43.7071	108.803
40.066	98.0714
69.9139	42.7501
91.8943	132.388
108.177	63.9887
98.2139	53.0137
46.273
