# Supplementary material for: Myofibroblast senescence promotes arrhythmogenic remodeling in the aged infarcted rabbit heart
Source: eLife. 2023 May 19;12:e84088. doi: 10.7554/eLife.84088 (PMC10259375; doi:10.7554/eLife.84088)
Supplement: Figure 8—source data 1. — Tabs contain data used to create panels A and B, and panel E, respectively. [file elife-84088-fig8-data1.xlsx]

## Sheet: Panel A and B
Rabbit ID	Age Group	Weeks Post-MI	Zone	Replicate	Myocyte ID	# Adjacent SABgal-	# Adjacent SABgal+
F427	Aged	3	IBZ Immediate	1	1	5	0
F427	Aged	3	IBZ Immediate	1	2	3	0
F427	Aged	3	IBZ Immediate	1	3	3	1
F427	Aged	3	IBZ Immediate	1	4	3	0
F427	Aged	3	IBZ Immediate	1	5	5	0
F427	Aged	3	IBZ Immediate	1	6	1	2
F427	Aged	3	IBZ Immediate	1	7	2	2
F427	Aged	3	IBZ Immediate	1	8	4	0
F427	Aged	3	IBZ Immediate	1	9	3	0
F427	Aged	3	IBZ Immediate	1	10	4	2
F427	Aged	3	IBZ Immediate	1	11	3	0
F427	Aged	3	IBZ Immediate	2	1	8	0
F427	Aged	3	IBZ Immediate	2	2	10	0
F427	Aged	3	IBZ Immediate	2	3	9	0
F427	Aged	3	IBZ Immediate	2	4	4	3
F427	Aged	3	IBZ Immediate	2	5	6	0
F427	Aged	3	IBZ Immediate	2	6	4	0
F427	Aged	3	IBZ Immediate	2	7	3	2
F427	Aged	3	IBZ Immediate	2	8	2	0
F427	Aged	3	IBZ Immediate	2	9	1	0
F427	Aged	3	IBZ Immediate	2	10	1	1
F427	Aged	3	IBZ Immediate	5	1	15	0
F427	Aged	3	IBZ Immediate	5	2	7	0
F427	Aged	3	IBZ Immediate	5	3	5	0
F427	Aged	3	IBZ Immediate	5	4	6	0
R053	Aged	3	IBZ Immediate	1	1	1	0
R053	Aged	3	IBZ Immediate	1	2	1	1
R053	Aged	3	IBZ Immediate	1	3	2	0
R053	Aged	3	IBZ Immediate	1	4	1	3
R053	Aged	3	IBZ Immediate	1	5	3	1
R053	Aged	3	IBZ Immediate	1	6	3	7
R053	Aged	3	IBZ Immediate	2	1	5	1
R053	Aged	3	IBZ Immediate	2	2	10	2
R053	Aged	3	IBZ Immediate	2	3	7	1
R053	Aged	3	IBZ Immediate	3	1	8	0
R053	Aged	3	IBZ Immediate	3	2	3	0
R053	Aged	3	IBZ Immediate	3	3	6	0
R053	Aged	3	IBZ Immediate	3	4	4	0
R053	Aged	3	IBZ Immediate	3	5	7	0
R053	Aged	3	IBZ Immediate	3	6	3	0
R053	Aged	3	IBZ Immediate	3	7	4	0
R053	Aged	3	IBZ Immediate	3	8	3	0
R053	Aged	3	IBZ Immediate	4	1	1	1
R053	Aged	3	IBZ Immediate	4	2	4	0
R053	Aged	3	IBZ Immediate	4	3	9	3
R053	Aged	3	IBZ Immediate	4	4	5	1
R053	Aged	3	IBZ Immediate	4	5	5	1
R053	Aged	3	IBZ Immediate	4	6	4	1
R053	Aged	3	IBZ Immediate	5	1	3	0
R053	Aged	3	IBZ Immediate	5	2	4	0
R053	Aged	3	IBZ Immediate	5	3	6	0
R053	Aged	3	IBZ Immediate	5	4	7	0
R053	Aged	3	IBZ Immediate	5	5	3	1
R126	Aged	3	IBZ Immediate	1	1	8	4
R126	Aged	3	IBZ Immediate	2	1	3	0
R126	Aged	3	IBZ Immediate	2	2	2	2
R126	Aged	3	IBZ Immediate	2	3	1	2
R126	Aged	3	IBZ Immediate	2	4	2	1
R126	Aged	3	IBZ Immediate	2	5	3	0
R126	Aged	3	IBZ Immediate	2	6	8	0
R126	Aged	3	IBZ Immediate	2	7	5	1
R126	Aged	3	IBZ Immediate	3	1	4	1
R126	Aged	3	IBZ Immediate	3	2	6	1
R126	Aged	3	IBZ Immediate	3	3	4	1
R126	Aged	3	IBZ Immediate	3	4	6	0
R126	Aged	3	IBZ Immediate	3	5	2	0
R126	Aged	3	IBZ Immediate	3	6	4	0
R126	Aged	3	IBZ Immediate	3	7	3	0
R126	Aged	3	IBZ Immediate	3	8	3	2
R126	Aged	3	IBZ Immediate	4	1	4	0
R126	Aged	3	IBZ Immediate	4	2	7	0
R126	Aged	3	IBZ Immediate	4	3	4	1
R126	Aged	3	IBZ Immediate	4	4	7	1
R126	Aged	3	IBZ Immediate	4	5	1	2
R126	Aged	3	IBZ Immediate	4	6	3	1
R4304	Aged	3	IBZ Immediate	1	1	3	3
R4304	Aged	3	IBZ Immediate	1	2	4	3
R4304	Aged	3	IBZ Immediate	1	3	4	1
R4304	Aged	3	IBZ Immediate	1	4	2	2
R4304	Aged	3	IBZ Immediate	1	5	7	0
R4304	Aged	3	IBZ Immediate	1	6	3	3
R4304	Aged	3	IBZ Immediate	1	7	0	3
R4304	Aged	3	IBZ Immediate	1	8	0	4
R4304	Aged	3	IBZ Immediate	1	9	0	3
R4304	Aged	3	IBZ Immediate	2	1	2	0
R4304	Aged	3	IBZ Immediate	2	2	5	0
R4304	Aged	3	IBZ Immediate	2	3	0	3
R4304	Aged	3	IBZ Immediate	2	4	3	1
R4304	Aged	3	IBZ Immediate	2	5	0	2
R4304	Aged	3	IBZ Immediate	2	6	3	3
R4304	Aged	3	IBZ Immediate	2	7	2	3
R4304	Aged	3	IBZ Immediate	2	8	4	0
R4304	Aged	3	IBZ Immediate	3	1	5	6
R4304	Aged	3	IBZ Immediate	3	2	2	4
R4304	Aged	3	IBZ Immediate	3	3	2	2
R4304	Aged	3	IBZ Immediate	3	4	4	3
R4304	Aged	3	IBZ Immediate	3	5	4	1
R4304	Aged	3	IBZ Immediate	3	6	1	6
R4304	Aged	3	IBZ Immediate	3	7	7	2
R4304	Aged	3	IBZ Immediate	3	8	2	0
R4304	Aged	3	IBZ Immediate	4	1	1	3
R4304	Aged	3	IBZ Immediate	4	2	0	4
R4304	Aged	3	IBZ Immediate	4	3	4	0
R4304	Aged	3	IBZ Immediate	4	4	1	1
R4304	Aged	3	IBZ Immediate	4	5	1	0
R4304	Aged	3	IBZ Immediate	4	6	5	1
R4304	Aged	3	IBZ Immediate	4	7	6	0
R4304	Aged	3	IBZ Immediate	4	8	1	0
R4304	Aged	3	IBZ Immediate	4	9	3	1
R4304	Aged	3	IBZ Immediate	4	10	4	0
R4304	Aged	3	IBZ Immediate	4	11	2	0
R4304	Aged	3	IBZ Immediate	4	12	4	0
R4304	Aged	3	IBZ Immediate	4	13	3	0
R4304	Aged	3	IBZ Immediate	4	14	2	0
R4304	Aged	3	IBZ Immediate	4	15	4	0
R4304	Aged	3	IBZ Immediate	4	16	1	0
R4304	Aged	3	IBZ Immediate	5	1	4	0
R4304	Aged	3	IBZ Immediate	5	2	1	5
R4304	Aged	3	IBZ Immediate	5	3	2	2
R4304	Aged	3	IBZ Immediate	5	4	2	3
R4304	Aged	3	IBZ Immediate	5	5	1	0
R4304	Aged	3	IBZ Immediate	5	6	2	2
X227	Aged	3	IBZ Immediate	1	1	5	0
X227	Aged	3	IBZ Immediate	1	2	3	0
X227	Aged	3	IBZ Immediate	1	3	5	0
X227	Aged	3	IBZ Immediate	1	4	3	0
X227	Aged	3	IBZ Immediate	1	5	7	0
X227	Aged	3	IBZ Immediate	1	6	3	2
X227	Aged	3	IBZ Immediate	1	7	7	1
X227	Aged	3	IBZ Immediate	1	8	2	1
X227	Aged	3	IBZ Immediate	1	9	4	0
X227	Aged	3	IBZ Immediate	2	1	3	0
X227	Aged	3	IBZ Immediate	2	2	8	0
X227	Aged	3	IBZ Immediate	2	3	3	0
X227	Aged	3	IBZ Immediate	2	4	9	0
X227	Aged	3	IBZ Immediate	2	5	4	0
X227	Aged	3	IBZ Immediate	2	6	4	0
X227	Aged	3	IBZ Immediate	2	7	5	0
X227	Aged	3	IBZ Immediate	2	8	8	0
X227	Aged	3	IBZ Immediate	2	9	4	0
X227	Aged	3	IBZ Immediate	2	10	4	0
X227	Aged	3	IBZ Immediate	2	11	3	0
X227	Aged	3	IBZ Immediate	2	12	4	0
X227	Aged	3	IBZ Immediate	2	13	3	0
X227	Aged	3	IBZ Immediate	2	14	2	0
X227	Aged	3	IBZ Immediate	2	15	4	0
X227	Aged	3	IBZ Immediate	3	1	3	1
X227	Aged	3	IBZ Immediate	3	2	9	2
X227	Aged	3	IBZ Immediate	3	3	4	0
X227	Aged	3	IBZ Immediate	3	4	3	0
X227	Aged	3	IBZ Immediate	3	5	2	0
X227	Aged	3	IBZ Immediate	3	6	6	0
X227	Aged	3	IBZ Immediate	3	7	3	2
X227	Aged	3	IBZ Immediate	3	8	2	3
X227	Aged	3	IBZ Immediate	3	9	3	1
X227	Aged	3	IBZ Immediate	3	10	4	1
X227	Aged	3	IBZ Immediate	3	11	3	1
X227	Aged	3	IBZ Immediate	3	12	2	2
X227	Aged	3	IBZ Immediate	4	1	4	1
X227	Aged	3	IBZ Immediate	4	2	4	0
X227	Aged	3	IBZ Immediate	4	3	5	4
X227	Aged	3	IBZ Immediate	4	4	3	0
X227	Aged	3	IBZ Immediate	4	5	3	2
X227	Aged	3	IBZ Immediate	4	6	7	0
X227	Aged	3	IBZ Immediate	4	7	5	3
X227	Aged	3	IBZ Immediate	4	8	9	0
X106	Young	3	IBZ Immediate	1	1	5	0
X106	Young	3	IBZ Immediate	1	2	4	0
X106	Young	3	IBZ Immediate	1	3	6	0
X106	Young	3	IBZ Immediate	1	4	12	0
X106	Young	3	IBZ Immediate	1	5	7	0
X106	Young	3	IBZ Immediate	1	6	5	0
X106	Young	3	IBZ Immediate	1	7	4	0
X106	Young	3	IBZ Immediate	1	8	6	0
X106	Young	3	IBZ Immediate	1	9	5	0
X106	Young	3	IBZ Immediate	1	10	6	0
X106	Young	3	IBZ Immediate	1	11	3	0
X106	Young	3	IBZ Immediate	1	12	5	0
X106	Young	3	IBZ Immediate	3	1	3	0
X106	Young	3	IBZ Immediate	3	2	5	0
X106	Young	3	IBZ Immediate	3	3	2	0
X106	Young	3	IBZ Immediate	3	4	5	0
X106	Young	3	IBZ Immediate	3	5	6	0
X106	Young	3	IBZ Immediate	3	6	3	0
X106	Young	3	IBZ Immediate	3	7	4	0
X106	Young	3	IBZ Immediate	3	8	4	0
X106	Young	3	IBZ Immediate	3	9	3	0
X106	Young	3	IBZ Immediate	4	1	6	0
X106	Young	3	IBZ Immediate	4	2	4	0
X106	Young	3	IBZ Immediate	4	3	5	0
X106	Young	3	IBZ Immediate	4	4	6	0
X106	Young	3	IBZ Immediate	4	5	5	0
X106	Young	3	IBZ Immediate	4	6	5	0
X106	Young	3	IBZ Immediate	4	7	4	0
X106	Young	3	IBZ Immediate	4	8	3	0
X106	Young	3	IBZ Immediate	4	9	4	0
X106	Young	3	IBZ Immediate	5	1	5	0
X106	Young	3	IBZ Immediate	5	2	4	0
X106	Young	3	IBZ Immediate	5	3	6	0
X106	Young	3	IBZ Immediate	5	4	4	0
X106	Young	3	IBZ Immediate	5	5	4	0
X106	Young	3	IBZ Immediate	5	6	5	0
X106	Young	3	IBZ Immediate	5	7	6	0
X106	Young	3	IBZ Immediate	5	8	3	0
X219	Young	3	IBZ Immediate	1	1	2	0
X219	Young	3	IBZ Immediate	1	2	3	0
X219	Young	3	IBZ Immediate	1	3	2	0
X219	Young	3	IBZ Immediate	1	4	4	0
X219	Young	3	IBZ Immediate	1	5	2	0
X219	Young	3	IBZ Immediate	1	6	7	0
X219	Young	3	IBZ Immediate	1	7	2	0
X219	Young	3	IBZ Immediate	1	8	3	0
X219	Young	3	IBZ Immediate	2	1	4	0
X219	Young	3	IBZ Immediate	2	2	3	0
X219	Young	3	IBZ Immediate	2	3	4	0
X219	Young	3	IBZ Immediate	2	4	7	1
X219	Young	3	IBZ Immediate	2	5	4	2
X219	Young	3	IBZ Immediate	2	6	3	2
X219	Young	3	IBZ Immediate	2	7	8	0
X219	Young	3	IBZ Immediate	2	8	4	0
X219	Young	3	IBZ Immediate	3	1	3	0
X219	Young	3	IBZ Immediate	3	2	6	0
X219	Young	3	IBZ Immediate	3	3	8	0
X219	Young	3	IBZ Immediate	3	4	6	0
X219	Young	3	IBZ Immediate	3	5	3	0
X219	Young	3	IBZ Immediate	3	6	5	0
X219	Young	3	IBZ Immediate	3	7	9	0
X219	Young	3	IBZ Immediate	3	8	5	1
X219	Young	3	IBZ Immediate	3	9	4	0
X219	Young	3	IBZ Immediate	4	1	3	0
X219	Young	3	IBZ Immediate	4	2	5	0
X219	Young	3	IBZ Immediate	4	3	8	0
X219	Young	3	IBZ Immediate	4	4	5	0
X219	Young	3	IBZ Immediate	4	5	6	0
X219	Young	3	IBZ Immediate	4	6	8	0
X219	Young	3	IBZ Immediate	5	1	5	0
X219	Young	3	IBZ Immediate	5	2	7	0
X219	Young	3	IBZ Immediate	5	3	4	0
X219	Young	3	IBZ Immediate	5	4	7	0
X219	Young	3	IBZ Immediate	5	5	5	0
X219	Young	3	IBZ Immediate	5	6	6	0
X219	Young	3	IBZ Immediate	5	7	3	0
X219	Young	3	IBZ Immediate	5	8	2	0
X219	Young	3	IBZ Immediate	5	9	6	0
X219	Young	3	IBZ Immediate	5	10	8	0
X225	Young	3	IBZ Immediate	5	1	2	0
X225	Young	3	IBZ Immediate	5	2	6	0
X225	Young	3	IBZ Immediate	5	3	3	0
X225	Young	3	IBZ Immediate	5	4	4	0
X225	Young	3	IBZ Immediate	5	5	2	0
X225	Young	3	IBZ Immediate	5	6	3	0
X225	Young	3	IBZ Immediate	5	7	3	0
X225	Young	3	IBZ Immediate	5	8	2	0
X225	Young	3	IBZ Immediate	5	9	2	0
X225	Young	3	IBZ Immediate	5	10	3	0
X225	Young	3	IBZ Immediate	5	11	4	0
X225	Young	3	IBZ Immediate	5	12	2	0
X225	Young	3	IBZ Immediate	5	13	2	0
X225	Young	3	IBZ Immediate	5	14	5	0
X225	Young	3	IBZ Immediate	5	15	5	0
X225	Young	3	IBZ Immediate	5	16	2	0
X225	Young	3	IBZ Immediate	5	17	7	0
X225	Young	3	IBZ Immediate	5	18	5	0
X225	Young	3	IBZ Immediate	5	19	4	0
X225	Young	3	IBZ Immediate	2	1	2	4
X225	Young	3	IBZ Immediate	2	2	2	2
X225	Young	3	IBZ Immediate	2	3	3	0
X225	Young	3	IBZ Immediate	2	4	4	0
X225	Young	3	IBZ Immediate	2	5	5	0
X225	Young	3	IBZ Immediate	2	6	3	0
X225	Young	3	IBZ Immediate	2	7	6	0
X225	Young	3	IBZ Immediate	2	8	7	0
X225	Young	3	IBZ Immediate	2	9	3	0
X225	Young	3	IBZ Immediate	2	10	2	1
X225	Young	3	IBZ Immediate	2	11	5	1
X225	Young	3	IBZ Immediate	2	12	4	0
X225	Young	3	IBZ Immediate	2	13	5	0
X225	Young	3	IBZ Immediate	2	14	3	1
X225	Young	3	IBZ Immediate	2	15	4	0
X225	Young	3	IBZ Immediate	2	16	4	1
X225	Young	3	IBZ Immediate	4	1	10	0
X225	Young	3	IBZ Immediate	4	2	6	1
X225	Young	3	IBZ Immediate	4	3	4	2
X225	Young	3	IBZ Immediate	4	4	6	0
X225	Young	3	IBZ Immediate	4	5	3	0
X225	Young	3	IBZ Immediate	4	6	5	0
X225	Young	3	IBZ Immediate	4	7	5	0
X225	Young	3	IBZ Immediate	4	8	4	0
X225	Young	3	IBZ Immediate	4	9	6	0
X225	Young	3	IBZ Immediate	4	10	5	0
X225	Young	3	IBZ Immediate	4	11	6	0
X225	Young	3	IBZ Immediate	4	12	7	0
X225	Young	3	IBZ Immediate	4	13	4	1
X225	Young	3	IBZ Immediate	4	14	9	1
X225	Young	3	IBZ Immediate	4	15	4	0
X225	Young	3	IBZ Immediate	4	16	4	1
X225	Young	3	IBZ Immediate	4	17	6	0
X225	Young	3	IBZ Immediate	4	18	5	0
X225	Young	3	IBZ Immediate	4	19	3	0
X225	Young	3	IBZ Immediate	4	20	5	0
X225	Young	3	IBZ Immediate	4	21	4	0

## Sheet: Panel E
								>2 foci	>2 foci
						Non-myocyte	Non-myocyte	Non-myocyte	Non-myocyte
Filename	Rabbit ID	Age Group	Weeks post-MI	Zone	Replicate	aSMA- gH2AX-	aSMA+ gH2AX-	aSMA- gH2AX+	aSMA+ gH2AX+	Total # Nuclei	% gH2AX+	% aSMA+	% of gH2AX+ that are aSMA+
	F427	Aged	3	IBZ	1
	F427	Aged	3	IBZ	2
2021_04_20 Slide176 F427 aSMA_gH2AX 60X IBZ 3 immediate	F427	Aged	3	IBZ	3	4	9	0	2	15	13.3333	73.3333	100
2021_04_20 Slide176 F427 aSMA_gH2AX 60X IBZ 4 immediate	F427	Aged	3	IBZ	4	18	4	0	1	23	4.34783	21.7391	100
	F427	Aged	3	IBZ	5
2021_04_20 Slide177 R126 aSMA_gH2AX 60X IBZ 1 immediate	R126	Aged	3	IBZ	1	8	2	0	0	10	0	20
2021_04_20 Slide177 R126 aSMA_gH2AX 60X IBZ 2 immediate	R126	Aged	3	IBZ	2	10	0	0	0	10	0	0
2021_04_20 Slide177 R126 aSMA_gH2AX 60X IBZ 3 immediate	R126	Aged	3	IBZ	3	5	5	0	1	11	9.09091	54.5455	100
2021_04_20 Slide177 R126 aSMA_gH2AX 60X IBZ 4 immediate	R126	Aged	3	IBZ	4	5	0	1	0	6	16.6667	0	0
	R126	Aged	3	IBZ	5
2021_04_22 Slide178 R4304 aSMA_gH2AX 60x IBZ 1 immediate	R4304	Aged	3	IBZ	1	13	7	0	0	20	0	35
2021_04_22 Slide178 R4304 aSMA_gH2AX 60x IBZ 2 immediate	R4304	Aged	3	IBZ	2	25	0	0	0	25	0	0
2021_04_22 Slide178 R4304 aSMA_gH2AX 60x IBZ 3 immediate	R4304	Aged	3	IBZ	3	5	2	0	0	7	0	28.5714
2021_04_22 Slide178 R4304 aSMA_gH2AX 60x IBZ 4 immediate	R4304	Aged	3	IBZ	4	24	2	0	0	26	0	7.69231
2021_04_22 Slide178 R4304 aSMA_gH2AX 60x IBZ 5 immediate	R4304	Aged	3	IBZ	5	21	1	0	0	22	0	4.54545
2021_04_22 Slide173 X227 aSMA_gH2AX 60x IBZ 1 immediate	X227	Aged	3	IBZ	1	17	0	0	0	17	0	0
2021_04_22 Slide173 X227 aSMA_gH2AX 60x IBZ 2 immedaite	X227	Aged	3	IBZ	2	29	10	1	0	40	2.5	25	0
2021_04_22 Slide173 X227 aSMA_gH2AX 60x IBZ 3 immediate	X227	Aged	3	IBZ	3	19	0	0	0	19	0	0
2021_04_22 Slide173 X227 aSMA_gH2AX 60x IBZ 4 immediate	X227	Aged	3	IBZ	4	25	3	0	0	28	0	10.7143
2021_04_22 Slide173 X227 aSMA_gH2AX 60x IBZ 5 immediate	X227	Aged	3	IBZ	5	41	0	0	0	41	0	0
2021_05_29 Slide057 X221 aSMA_gH2AX 60x IBZ 4 immediate	X221	Young	3	IBZ	4	32	8	0	0	40	0	20
2021_05_29 Slide057 X221 aSMA_gH2AX 60x IBZ 3 immediate	X221	Young	3	IBZ	3	18	5	0	0	23	0	21.7391
2021_05_29 Slide057 X221 aSMA_gH2AX 60x IBZ 2 immediate	X221	Young	3	IBZ	2	7	3	0	0	10	0	30
2021_05_29 Slide057 X221 aSMA_gH2AX 60x IBZ 1 immediate	X221	Young	3	IBZ	1	7	8	0	0	15	0	53.3333
	3890	Young	3	IBZ	5
2021_05_28 Slide193 3890 aSMA_gH2AX 60x IBZ 4 immediate	3890	Young	3	IBZ	4	20	16	0	0	36	0	44.4444
2021_05_28 Slide193 3890 aSMA_gH2AX 60x IBZ 3 immediate	3890	Young	3	IBZ	3	17	2	0	0	19	0	10.5263
2021_05_28 Slide193 3890 aSMA_gH2AX 60x IBZ 2 immediate	3890	Young	3	IBZ	2	17	2	0	0	19	0	10.5263
2021_05_28 Slide193 3890 aSMA_gH2AX 60x IBZ 1 immediate	3890	Young	3	IBZ	1	27	5	0	0	32	0	15.625
2021_05_28 Slide192 X230 aSMA_gH2AX 60x IBZ 5 immediate	X230	Young	3	IBZ	5	15	10	0	0	25	0	40
2021_05_28 Slide192 X230 aSMA_gH2AX 60x IBZ 4 immediate	X230	Young	3	IBZ	4	31	4	1	1	37	5.40541	13.5135	50
2021_05_28 Slide192 X230 aSMA_gH2AX 60x IBZ 3 immediate	X230	Young	3	IBZ	3	13	11	1	0	25	4	44	0
2021_05_28 Slide192 X230 aSMA_gH2AX 60x IBZ 2 immediate	X230	Young	3	IBZ	2	13	2	1	0	16	6.25	12.5	0
2021_05_28 Slide192 X230 aSMA_gH2AX 60x IBZ 1 immediate	X230	Young	3	IBZ	1	17	9	0	0	26	0	34.6154
2021_05_28 Slide191 X228 aSMA_gH2AX 60x IBZ 5 immediate	X228	Young	3	IBZ	5	4	9	1	0	14	7.14286	64.2857	0
2021_05_28 Slide191 X228 aSMA_gH2AX 60x IBZ 4 immediate	X228	Young	3	IBZ	4	1	13	0	1	15	6.66667	93.3333	100
2021_05_28 Slide191 X228 aSMA_gH2AX 60x IBZ 3 immediate	X228	Young	3	IBZ	3	11	5	0	4	20	20	45	100
2021_05_28 Slide191 X228 aSMA_gH2AX 60x IBZ 2 immediate	X228	Young	3	IBZ	2	16	17	1	0	34	2.94118	50	0
2021_05_28 Slide191 X228 aSMA_gH2AX 60x IBZ 1 immediate	X228	Young	3	IBZ	1	9	17	0	0	26	0	65.3846
