# Supplementary material for: Myofibroblast senescence promotes arrhythmogenic remodeling in the aged infarcted rabbit heart
Source: eLife. 2023 May 19;12:e84088. doi: 10.7554/eLife.84088 (PMC10259375; doi:10.7554/eLife.84088)
Supplement: Figure 9—source data 1. [file elife-84088-fig9-data1.xlsx]

## Sheet: Panel A Frozen Section
Filename	Rabbit	Cell ID	Condition	Volume
2021_06_22 Slide418 S1165 Volume 60x IBZ 2 Fib 1 Pro	S1165	1	Proliferating	209.907	microns^3
2021_06_22 Slide418 S1165 Volume 60x IBZ 2 Fib 4 Pro	S1165	4	Proliferating	186.499	microns^3
2021_06_22 Slide418 S1165 Volume 60x IBZ 2 Fib 5 Pro	S1165	5	Proliferating	183.035	microns^3
2021_06_22 Slide418 S1165 Volume 60x IBZ 2 Fib 6 Pro	S1165	6	Proliferating	339.908	microns^3
2021_06_22 Slide418 S1165 Volume 60x IBZ 3 Fib 4 Pro	S1165	4	Proliferating	279.007	microns^3
2021_06_22 Slide418 S1165 Volume 60x IBZ 3 Fib 5 Pro	S1165	5	Proliferating	282.178	microns^3
2021_06_22 Slide418 S1165 Volume 60x IBZ 3 Fib 6 Pro	S1165	6	Proliferating	176.63	microns^3
2021_06_22 Slide418 S1165 Volume 60x IBZ 3 Fib 8 Pro	S1165	8	Proliferating	137.01	microns^3
2021_06_22 Slide418 S1165 Volume 60x IBZ 4 Fib 1 Pro	S1165	1	Proliferating	239.835	microns^3
2021_06_22 Slide418 S1165 Volume 60x IBZ 4 Fib 3 Pro	S1165	3	Proliferating	226.087	microns^3
2021_06_22 Slide418 S1165 Volume 60x IBZ 4 Fib 4 Pro	S1165	4	Proliferating	293.334	microns^3
2021_06_22 Slide419 F985 Volume 60x IBZ 1 Fib 1 Pro	F985	1	Proliferating	620.569	microns^3
2021_06_22 Slide419 F985 Volume 60x IBZ 1 Fib 2 Pro	F985	2	Proliferating	309.579	microns^3
2021_06_22 Slide419 F985 Volume 60x IBZ 1 Fib 3 Pro	F985	3	Proliferating	163.471	microns^3
2021_06_22 Slide419 F985 Volume 60x IBZ 1 Fib 4 Pro	F985	4	Proliferating	416.875	microns^3
2021_06_22 Slide419 F985 Volume 60x IBZ 1 Fib 5 Pro	F985	5	Proliferating	222.741	microns^3
2021_06_22 Slide419 F985 Volume 60x IBZ 2 Fib 3 Pro	F985	3	Proliferating	375.388	microns^3
2021_06_22 Slide419 F985 Volume 60x IBZ 3 Fib 2 Pro	F985	2	Proliferating	366.199	microns^3
2021_06_22 Slide419 F985 Volume 60x IBZ 3 Fib 4 Pro	F985	4	Proliferating	339.177	microns^3
2021_06_22 Slide418 S1165 Volume 60x IBZ 2 Fib 2 Snt	S1165	2	Senescent	92.7381	microns^3
2021_06_22 Slide418 S1165 Volume 60x IBZ 2 Fib 3 Snt	S1165	3	Senescent	326.2	microns^3
2021_06_22 Slide418 S1165 Volume 60x IBZ 2 Fib 7 Snt	S1165	7	Senescent	608.399	microns^3
2021_06_22 Slide418 S1165 Volume 60x IBZ 2 Fib 8 Snt	S1165	8	Senescent	553.216	microns^3
2021_06_22 Slide418 S1165 Volume 60x IBZ 3 Fib 1 Snt	S1165	1	Senescent	583.384	microns^3
2021_06_22 Slide418 S1165 Volume 60x IBZ 3 Fib 2 Snt	S1165	2	Senescent	416.894	microns^3
2021_06_22 Slide418 S1165 Volume 60x IBZ 3 Fib 3 Snt	S1165	3	Senescent	756.801	microns^3
2021_06_22 Slide418 S1165 Volume 60x IBZ 3 Fib 7 Snt	S1165	7	Senescent	793.458	microns^3
2021_06_22 Slide418 S1165 Volume 60x IBZ 4 Fib 2 Snt	S1165	2	Senescent	787.65	microns^3
2021_06_22 Slide418 S1165 Volume 60x IBZ 4 Fib 5 Snt	S1165	5	Senescent	1120	microns^3
2021_06_22 Slide419 F985 Volume 60x IBZ 2 Fib 1 Snt	F985	1	Senescent	1080.29	microns^3
2021_06_22 Slide419 F985 Volume 60x IBZ 2 Fib 2 Snt	F985	2	Senescent	802.443	microns^3
2021_06_22 Slide419 F985 Volume 60x IBZ 3 Fib 1 Snt	F985	1	Senescent	2296.91	microns^3
2021_06_22 Slide419 F985 Volume 60x IBZ 3 Fib 3 Snt	F985	3	Senescent	566.599	microns^3
			Average Proliferating	282.496
			Average Senescent	770.356
			T Test	0.0038091

## Sheet: Panel A in vitro
Filename	Group	Volume	Unit
C1-2021_05_23 arCFs F1045 p3 pro Cx43 Abcam 1_100 For_Volume 5-1 Cell3	Proliferating	4358.26	microns^3
C1-2021_05_23 arCFs F1045 p3 pro Cx43 Abcam 1_100 For_Volume 5-1 Cell2	Proliferating	3965.64	microns^3
C1-2021_05_23 arCFs F1045 p3 pro Cx43 Abcam 1_100 For_Volume 5-1 Cell1	Proliferating	15659.4	microns^3
C1-2021_05_23 arCFs F1045 p3 pro Cx43 Abcam 1_100 For_Volume 4-1 Cell6	Proliferating	3811.24	microns^3
C1-2021_05_23 arCFs F1045 p3 pro Cx43 Abcam 1_100 For_Volume 4-1 Cell5	Proliferating	3201.25	microns^3
C1-2021_05_23 arCFs F1045 p3 pro Cx43 Abcam 1_100 For_Volume 4-1 Cell4	Proliferating	4674.84	microns^3
C1-2021_05_23 arCFs F1045 p3 pro Cx43 Abcam 1_100 For_Volume 4-1 Cell3	Proliferating	3372.19	microns^3
C1-2021_05_23 arCFs F1045 p3 pro Cx43 Abcam 1_100 For_Volume 4-1 Cell2	Proliferating	3239.55	microns^3
C1-2021_05_23 arCFs F1045 p3 pro Cx43 Abcam 1_100 For_Volume 4-1 Cell1	Proliferating	6508.23	microns^3
C1-2021_05_23 arCFs F1045 p3 pro Cx43 Abcam 1_100 For_Volume 3-1 Cell6	Proliferating	4070.85	microns^3
C1-2021_05_23 arCFs F1045 p3 pro Cx43 Abcam 1_100 For_Volume 3-1 Cell5	Proliferating	2337.82	microns^3
C1-2021_05_23 arCFs F1045 p3 pro Cx43 Abcam 1_100 For_Volume 3-1 Cell4	Proliferating	3182.5	microns^3
C1-2021_05_23 arCFs F1045 p3 pro Cx43 Abcam 1_100 For_Volume 3-1 Cell3	Proliferating	7082.18	microns^3
C1-2021_05_23 arCFs F1045 p3 pro Cx43 Abcam 1_100 For_Volume 3-1 Cell2	Proliferating	2950.07	microns^3
C1-2021_05_23 arCFs F1045 p3 pro Cx43 Abcam 1_100 For_Volume 3-1 Cell1	Proliferating	3837.83	microns^3
C1-2021_05_23 arCFs F1045 p3 pro Cx43 Abcam 1_100 For_Volume 2 Cell3	Proliferating	12404	microns^3
C1-2021_05_23 arCFs F1045 p3 pro Cx43 Abcam 1_100 For_Volume 2 Cell2	Proliferating	3534.02	microns^3
C1-2021_05_23 arCFs F1045 p3 pro Cx43 Abcam 1_100 For_Volume 2 Cell1	Proliferating	5056.8	microns^3
C1-2021_05_23 arCFs F1045 p3 pro Cx43 Abcam 1_100 For_Volume 1 Cell5	Proliferating	2525.89	microns^3
C1-2021_05_23 arCFs F1045 p3 pro Cx43 Abcam 1_100 For_Volume 1 Cell4	Proliferating	3418.64	microns^3
C1-2021_05_23 arCFs F1045 p3 pro Cx43 Abcam 1_100 For_Volume 1 Cell3	Proliferating	2913.52	microns^3
C1-2021_05_23 arCFs F1045 p3 pro Cx43 Abcam 1_100 For_Volume 1 Cell2	Proliferating	2693.82	microns^3
C1-2021_05_23 arCFs F1045 p3 pro Cx43 Abcam 1_100 For_Volume 1 Cell1	Proliferating	11874	microns^3
C3-2021_06_06 arCFs Senescent Cx43 40x 1 Cell1 Threshold	Senescent	7421.2	microns^3
C3-2021_06_06 arCFs Senescent Cx43 40x 5-1 Cell1 Threshold	Senescent	11273.4	microns^3
C3-2021_06_06 arCFs Senescent Cx43 40x 5 Cell2	Senescent	24161.5	microns^3
C3-2021_06_06 arCFs Senescent Cx43 40x 6-2 Cell1	Senescent	25927.1	microns^3
C3-2021_06_06 arCFs Senescent Cx43 40x 6-1 Cell2	Senescent	30295.1	microns^3
C3-2021_06_06 arCFs Senescent Cx43 40x 6 Cell3	Senescent	32118.1	microns^3
C1-2021_06_06 arCFs Senescent Cx43 40x 7-1 Cell1	Senescent	17028.9	microns^3
C1-2021_06_06 arCFs Senescent Cx43 40x 8-2 Cell1	Senescent	38305.9	microns^3
C1-2021_06_06 arCFs Senescent Cx43 40x 8-1 Cell2	Senescent	70983.3	microns^3
C1-2021_06_06 arCFs Senescent Cx43 40x 8 Cell3	Senescent	73475.6	microns^3
C1-2021_06_06 arCFs Senescent Cx43 40x 9-2 Cell1	Senescent	12379.1	microns^3
C1-2021_06_06 arCFs Senescent Cx43 40x 9-1 Cell2	Senescent	21194.8	microns^3
C1-2021_06_06 arCFs Senescent Cx43 40x 9 Cell3	Senescent	38377	microns^3
C1-2021_06_06 arCFs Senescent Cx43 40x 10-2 Cell1	Senescent	10456.6	microns^3
C1-2021_06_06 arCFs Senescent Cx43 40x 10-1 Cell2	Senescent	21669.4	microns^3
C1-2021_06_06 arCFs Senescent Cx43 40x 10 Cell3	Senescent	33972.7	microns^3
