# Supplementary material for: Myofibroblast senescence promotes arrhythmogenic remodeling in the aged infarcted rabbit heart
Source: eLife. 2023 May 19;12:e84088. doi: 10.7554/eLife.84088 (PMC10259375; doi:10.7554/eLife.84088)
Supplement: Supplementary file 1. [file elife-84088-supp1.xlsx]

## Sheet: Sheet1
Target	Host Species	Company	Product Number
αSMA	Mouse	Sigma	A5228-100UL
Troponin T	Mouse	Invitrogen	Ma5-12960
Cx43	Goat	Abcam	ab219493
γH2AX	Rabbit	Cell Signaling	2577
γH2AX	Mouse	Abcam	ab26350
αSMA	Goat	Novus	NB300-978SS
CD31	Goat	R&D Systems	AF3628
vWF	Sheep	Abcam	ab11713
WGA Alexa 594		Thermo	W11262
Mouse Alexa Fluor 647	Goat	Thermo	A21235
Goat Alexa Fluor 488	Donkey	Thermo	A11005
Rabbit Alexa Fluor 594	Goat	Thermo	A110012
Sheep Alexa Fluor 594	Donkey	Thermo	A110016
Sheep Alexa Fluor 647	Donkey	Thermo	A21448
