# Supplementary material for: Myofibroblast senescence promotes arrhythmogenic remodeling in the aged infarcted rabbit heart
Source: eLife. 2023 May 19;12:e84088. doi: 10.7554/eLife.84088 (PMC10259375; doi:10.7554/eLife.84088)
Supplement: Supplementary file 2. [file elife-84088-supp2.xlsx]

## Sheet: Sheet1
Target	Primer/probe Sequences (5’-3’)	Efficiency
SRP14	Accession: XM_002717984.2	1.02
	Forward: 5’ – TTCCAGAAATGCCGGTTGTC – 3’
	Reverse: 5’ – CAAAGCCCTCCACAGAACCTT – 3’
p16	Accession: XM_008255019.2	0.96
	Forward: 5’ – GCCGAAGGCGGTAACCA -3’
	Reverse: 5’ – GCTTCGATGCTGGACTTCTCA – 3’
p21	Accession: XM_002714669.2	0.98
	Forward: 5’ – GAGACTGCGACGCACTCATG – 3’’
	Reverse: 5’ – CGCTCCCAGGCGAAGTT – 3’’
p53	Accession: XM_017348089.1	1
	Forward: 5’ – CCTGGAGCTCTGGTCTGAGATC – 3’
	Reverse: 5’ – CCACCACGTCAAATACCCCTAA – 3’
TGFβ	Accession: XM_008249704.2	0.97
	Forward: 5’ – CACCCGCGTGCTAATGGT – 3’
	Reverse: 5’ – CCGGAGCTCTGACGTGTTAAA – 3’
IL-6	Accession: NM_001082064.2	1.07
	Forward: 5’ – GAAAACACCAGGGTCAGCAT – 3’
	Reverse: 5’ – TGAGGGTGGCTTCTTCATTC – 3’
CCL2	Accession: NM 001082294.1	0.97
	Forward: 5’ – TGAATTCCCCAGTCACCTGC – 3’
	Reverse: 5’ – TTGGGACACTTGGTGCTGTT – 3’
CXCL2	Accession: XM_002717021.3	1.01
	Forward: 5’ – AGACCGTGCAGGGCATTC – 3’
	Reverse: 5’ – GACTTGAGCGTGGCTATGACTTC – 3’
MMP9	Accession: NM_001082203.1	1.09
	Forward: 5’ – TCCAACTTTGACAGCGACA – 3’
	Reverse: 5’ - GGAGTGATCCAAGCCCAGTG – 3’
TIMP1	Accession: XM_008272340.2	1
	Forward: 5’ – GCAACTCCGACCTTGTCATC – 3’
	Reverse: 5’ – AGCGTAGGTCTTGGTGAAGC – 3’
TIMP2	Accession: XM_008252510.2	1.03
	Forward: 5’ – GCGAGAAGGAGGTGGACT – 3’
	Reverse: 5’ – TTGTCGGGGCCTTTGAACAT – 3’
IL-8	Accession: NM_001082293.1	1.04
	Forward: 5’ –CTGTTGGTCAGGCCATGAGT– 3’
	Reverse: 5’ –AAAGTGCTTCCATGTGCCCT– 3’
SDHA	Accession: XM_002723194	1.06
	Forward: 5’ –GGACCAGGACGCCATCCACTAC– 3’
	Reverse: 5’ –TCCACCGAACGCACGCTGATAG– 3’
HPRT1	Accession: NM_001105671	1.01
	Forward: 5’ –CCTTGGTCAAGCAGTATAATC– 3’
	Reverse: 5’ –GGGCATATCCTACAACAAAC– 3’
